# Supplementary material for: Prolonged morphological expansion of spiny-rayed fishes following the end-Cretaceous
Source: Springer Nature journal article supplement (doi:10.1038/s41559-022-01801-3), 2022-07-14
Supplement: 41559_2022_1801_MOESM1_ESM.pdf [file 41559_2022_1801_MOESM1_ESM.pdf]

**Supplementary information**

---

**Prolonged morphological expansion of  
spiny-rayed fishes following the end-  
Cretaceous**

---

In the format provided by the  
authors and unedited

## 1. Supplementary Methods

### *a. Taxon sampling*

The phylogenetic analyses included UCE sequence data sampled from 1,109 specimens that include 1,084 species. For this study, we collected new UCE sequence data from 653 specimens. We retrieved UCE loci from the remaining 456 specimens at NCBI from previous studies of acanthomorph phylogeny<sup>1-5</sup> or from whole genomic data (Supplementary Table 1). This study included representatives of all currently recognized acanthomorph taxonomic orders, 307 of the 331 (92.7%) described taxonomic families of Acanthomorpha and 276 of the 290 (95.2%) families of Percomorpha<sup>6</sup>. Based on previous phylogenetic analyses<sup>7,8</sup>, we sampled two species of Aulopiformes and seven species of Myctophiformes as outgroups for the phylogenetic analyses: *Notolepis coatsi*, *Alepisaurus ferox*, *Scopelengys tristis*, *Neoscopelus macrolepidotus*, *Neoscopelus microchir*, *Dasyscopelus selenops*, *Benthosema glaciale*, *Notoscopelus caudispinosus*, and *Ceratospelus warmingii*. We sampled phenotypic data from 680 of the 1,075-acanthomorph species sampled in the UCE inferred phylogeny. We inferred phylogenies from the UCE dataset for an inclusive taxon sampling of 1,084 species and for a set of 702 species that included the 680 for which corresponding morphological data was obtained. We refer to these UCE datasets and resulting phylogenies as the 1,084- and 702-taxon datasets and trees, respectively.

### *b. Library preparation, target enrichment, and sequencing*

We isolated DNA from tissue biopsies using Qiagen DNeasy Blood and Tissue kits following the manufacturer's protocol. We used a Qubit fluorometer (Life Technologies) to quantify 1-2 uL of all DNA extractions. We sheared approximately 500 ng of genomic DNA from each sampled specimen using a QSonica Q800R3 sonicator to obtain fragment sizes between 300-600 bp. For library preparation and target enrichment of UCE loci, we followed protocols described in a previous study<sup>3</sup> using Kapa HyperPrep kits (Kapa Biosystems) and Illumina TruSeq iTru5 and iTru7 adapters for dual indexing of genomic libraries<sup>9</sup>. We used a bait set from Arbor Biosciences designed to target 1,314 UCE loci in acanthomorph fishes for target-enrichment of UCE loci<sup>3</sup>. Enriched libraries were sequenced using 150 bp paired-end sequencing on Illumina HiSeq platforms.

### ***c. Assembly and alignment construction***

For 96 species, we harvested UCE loci sequences from existing whole genomic data (Supplementary Table 1). We downloaded genomes from NCBI and converted to 2bit format using faToTwoBit from the UCSC Genome Browser Downloads (<https://hgdownload.cse.ucsc.edu/admin/exe/>). We then located UCE loci in each genome assembly by running the PHYLUCe v.1.7.1<sup>10,11</sup> program `run_multiple_lastzs_sqlite.py` with default parameters and the FASTA file containing the UCE bait sequences. From each assembly, we extracted the identified UCE loci along with  $\pm 500$  bp of sequence from each flank using `phyluce_probe_slice_sequence_from_genomes.py` with default parameters.

To process raw read data generated by our own sequencing efforts, construct assemblies, identify orthologous UCE sequences, and construct alignments for each UCE locus, we used the PHYLUCe computer package<sup>10,11</sup>, which uses parallel wrapper functions around external programs to perform tasks required to process high-throughput DNA sequence data. We used the `illumiprocessor` parallel wrapper program (<https://github.com/faircloth-lab/illumiprocessor>) to implement Trimmomatic<sup>12</sup>, which removes adapter index sequences and low-quality bases from demultiplexed raw reads. We constructed assemblies for each sample using *trinity* v.r2013-02-25<sup>13</sup> and used the PHYLUCe program `phyluce_assembly_match_contigs_to_probes` to identify which assembled contigs represented UCE sequences by matching them to a FASTA file containing the UCE bait sequences, and to remove reciprocal and non-reciprocal duplicates.

We used PHYLUCe programs to infer a separate set of alignments and phylogenies for the 702 species including the sampling of morphological data and the full 1,109 specimen sampling using the same protocols. We generated alignments for each UCE locus using MAFFT v7.130b<sup>14</sup> and trimmed with trimAL v1.4.rev<sup>15</sup>. For further downstream phylogenetic analyses, we retained UCE loci that included at least 75% of the total specimens in both the 1,084- and 702-taxon datasets.

### ***d. Phylogenetic analyses***

We inferred phylogenies for both the 1,084-taxon and 702-taxon datasets using maximum likelihood methods as implemented in IQ-TREE v. 1.7<sup>16</sup> and RAxML-ng 0.9.0<sup>17</sup>. In IQ-TREE, we ran tree searches using ultrafast bootstrap approximation until 1,000 bootstrap replicates and

1,000 replicates of the Shimodaira-Hasegawa approximate likelihood ratio test (SH-aLRT) were generated<sup>18</sup>. Phylogenies inferred in IQ-TREE using the unpartitioned alignments described above served as the topological constraints for subsequent divergence time analyses. Maximum likelihood tree searches conducted in IQ-TREE used the ModelFinderPlus<sup>19</sup> option, which applies a relaxed hierarchical clustering search algorithm to determine partitioning schemes and models of molecular evolution.

Before conducting analyses in RAxML-ng v0.9.0<sup>17</sup>, we determined partitioning schemes using PartitionFinder2 v2.1.1<sup>20</sup>, with units of partitioning based on individual UCE loci. We identified these partitioning schemes using a relaxed hierarchical clustering search algorithm with a maximum cluster size set to 1000 data blocks, the Bayesian Information Criterion method for partition model comparison, and GTR+Gamma as the model of molecular evolution. We removed all fully undetermined columns from our partitioned, concatenated alignment using RAxML-ng, compressed the alignment, and converted to binary. We performed maximum likelihood tree searches on these alignments using the extended majority rule criterion method implemented with the autoMRE command to continue bootstrapping until convergence.

We compared the tree topologies inferred in the concatenated analyses described above using the program TOPD\_v4.6<sup>21</sup>. Phylogenies based on the 1,084-species dataset (IQ-TREE single-partition, IQ-TREE multiple partitions, and RAxML-ng multiple partitions) were compared to one another, and separate analyses compared the three phylogenies inferred from the 702-taxon dataset. We utilized TOPD to calculate partition metrics, i.e., TOPD's "Split" method<sup>22</sup>, and path length metrics, i.e., TOPD's "Nodal" method<sup>23</sup>. We produced lists of taxa with different phylogenetic positions among the compared trees using TOPD's "Disagree" method, which removes a single taxon at each iteration and calculates the reduction in trees' split distance.

We inferred a summary species tree in ASTRAL-III v5.6.3<sup>24</sup>, using maximum likelihood gene trees for each UCE locus generated with IQ-TREE v 1.6.12. For individual gene tree inference, we applied the ModelFinder Plus<sup>19</sup> option to determine the optimal model of molecular evolution as well as the ultrafast bootstrap approximation with a maximum of 10,000 bootstrap iterations. We used TreeShrink<sup>25</sup> to identify abnormally long branch lengths in the individual UCE gene trees and to minimize the impact of misspecified sequences. We used a false positive tolerance rate parameter (alpha) of 0.05 in our TreeShrink filtering to automate the

removal of potentially aberrant sequences from the UCE alignment. We re-aligned the TreeShrink-pruned alignments using MAFFT v7.130b<sup>14</sup> and re-inferred gene trees using IQ-TREE, as above. We used these gene trees to infer a species tree in ASTRAL-III.

#### *e. Bayesian concordance factor analyses*

To evaluate the phylogenetic discordance among individual UCE gene trees, we used IQ-TREE to estimate maximum likelihood gene- and site-concordance factors (gCF and sCF, respectively; methods are described in the main text) and BUCKy<sup>26</sup> to estimate Bayesian genome-wide concordance factors. We compared alternative phylogenetic hypotheses among the major lineages of Acanthomorpha using these concordance factors. BUCKy estimates the frequency of topological partitions that occur in a sample of Bayesian gene tree posterior distributions and provides an estimate for their genome-wide frequency and 95% confidence intervals. Because the number of possible topological relationships among taxa increases non-linearly as the number of species included in the analysis increases, large taxonomic datasets are intractable for thorough concordance factor analyses with BUCKy. We therefore used a reduced taxonomic dataset of 82 species that represent each of the major subclades of Acanthomorpha to reduce computational burden. For this reduced dataset, we generated alignments of the 82 species using MAFFT (Supplementary Table 1). We used MrBayes v. 3.2.7<sup>27</sup> to infer a Bayesian gene tree distributions for each UCE locus. We ran MrBayes analyses with a GTR+Gamma molecular evolutionary model for 2 million generations, with trees sampled every 2,000 generations. Using the BUCKy program mbsum, we discarded the first 75% of sampled trees from the posterior sample of each UCE locus as burnin, summarized branching patterns in the remaining post-burnin posterior distribution, and used an alpha value of 1.0 for concordance factor estimation. These gene tree posterior distributions were then used for subsequent BUCKy estimation of concordance factors.

#### *f. Divergence-time estimation*

We estimated divergence times for both the 702- and 1,084-taxon phylogenies using BEAST v.2.5<sup>28</sup> following a protocol used in other UCE studies where BEAST analyses were run using reduced datasets of 30 UCE loci<sup>1,5,29</sup>. We constrained the phylogeny used in the BEAST runs using the IQ-TREE analyses of the 1,084- and 702-taxon datasets. For both datasets, we

performed BEAST analyses on three different sets of 30 loci, each randomly drawn without replacement from the entire set of ~1,000 UCE loci. Exploratory BEAST analyses using sets of 25 and 50 loci yielded similar divergence time estimates, justifying the moderately computationally expensive analyses using the 30 locus datasets. For each subset of 30 loci, we determined the optimum partitioning scheme using the relaxed hierarchical clustering algorithm in PartitionFinder2 v. 2.1.1<sup>20</sup>. For divergence dating analyses performed in BEAST, we employed a relaxed lognormal clock model and a birth-death tree model. We assigned minima for age priors using forty-three fossil occurrences, described below. For each 30-locus dataset, we ran at least three replicate analyses for a minimum of 200 million generations beyond a total burnin of 200 million generations. As MCMC chains progressed, we accepted suggestions provided by BEAST for improving operators' tuning parameter values. We used Tracer v.1.7.1 to observe effective sample size (ESS) values for posterior parameter estimates, to assess convergence among replicate MCMC chains, and to check for directional trends in parameter estimates<sup>30</sup>. Though the large size of the phylogenies created computational limits that resulted in moderate ESS values for some parameters, most parameter estimates reached ESS values well above 200. Some analyses were run up to 900 million generations in length to obtain adequate ESS values and ensure no directional trends in and unimodal distributions of parameter estimates. We used LogCombiner in BEAST v.1.8.4<sup>31,32</sup> to remove a burnin, and trees from each replicate run were randomly thinned. We thinned the sets of 1,084-species trees such that a total of 1,200 trees would remain across all runs, with an equal number of trees from each replicate contributing to the final summary trees. We randomly thinned the sets of 702-species trees such that 10,000 total trees remained across replicate runs. For each set of loci, we used LogCombiner to combine trees from replicate runs and TreeAnnotator in BEAST v.1.8.4 (Drummond et al. 2012) to estimate maximum clade credibility trees.

### ***g. Diversification rate analyses***

We performed diversification rate analyses on the time-calibrated 1,084-taxon phylogeny that was run for the most generations and therefore had the highest ESS values for posterior parameter estimates. Species diversity of acanthomorph lineages used to determine sampling fractions for all diversification rate analyses were based on numbers of species presented in Eschmeyer's Catalog of Fishes<sup>6</sup>, which at the time of the analyses included 19,219 species of

Acanthomorpha. We removed all outgroups and duplicate samples of the same species before performing diversification rate analyses, leaving a phylogeny consisting of 1,075 acanthomorph species and a sampling fraction of 0.056. We performed stepping-stone simulations within TESS<sup>33</sup> to estimate the marginal likelihoods of eight birth-death models and evaluate their fit to the acanthomorph time-calibrated phylogeny. Competing models included those with constant diversification rates, with episodically changing rates, or with decreasing speciation rates. Variants of the constant rate model with and without a mass extinction event were also tested to assess the potential impact of the K-Pg mass extinction on acanthomorph diversification. We tested variants of the competing models that accommodated the effects of incomplete taxon sampling by correcting for uniform (random) or diversified sampling methods.

Using the simulated marginal likelihoods of candidate models, we calculated Bayes factors and compared the relative fits of models to the acanthomorph phylogeny (Extended Data Fig. 6). With the exception of the models assuming a decreasing speciation rate, we ran stepping-stone simulations for 10,000 iterations with 1,000 power posteriors (stepping stones) and a burn-in period of 3,000 generations. Due to limited computational resources, we ran the simulations of marginal likelihoods for the decreasing speciation rate (i.e., continuous) models for 2,000 iterations (a burn-in of 500 generations was removed) with 100 power posteriors. This test of relative model fit greatly favored models assuming uniform (random) sampling methods over diversified methods (Extended Data Fig. 6), informing our model selection in downstream TESS analyses.

We extracted the three branching process-models that were most favored in the tests of relative model fit and assessed their absolute fit to the acanthomorph phylogeny using posterior-predictive simulations. We compared the predictive distributions of the gamma statistic, number of taxa, and lineage-through-time (LTT) plots to the empirical estimates.

We inferred the global speciation, extinction and net-diversification rates through time using the CoMET model as employed by TESS. For CoMET analyses represented in Extended Data Fig. 5, we specified a uniform (random) sampling strategy ( $\rho = 0.056$ ), conditioned the model on taxa survival, discarded a burn-in of 30,000 iterations, and ran three replicate reversible-jump MCMC chains until the effective sample size (ESS) reached 500 or greater. We assessed convergence within each CoMET run by calculating the effective sample sizes and

Geweke diagnostics for the diversification rate, and we assessed convergence of multiple runs using the Rubin-Gelman test.

We inferred global diversification rates and examined rate heterogeneity across clades using BAMM v.2.5.0<sup>34</sup>. Our analyses corrected for incomplete sampling by accounting for the sampling fractions of 304 major representative clades, most of which are taxonomic families, in accordance with the number of species described by Eschmeyer's Catalog of Fishes<sup>6</sup>. We also used the information on species diversity to appropriately adjust these clade-specific sampling fractions for non-monophyletic taxonomic groups. As in the TESS analyses, we set the global sampling fraction for all BAMM analyses to 0.056. We identified appropriate rate priors using the function `setBAMMpriors` in the R package `BAMMtools` v.2.1.6<sup>35</sup>, accounting for incomplete taxon sampling.

We ran Markov chain Monte Carlo simulations for 100 million generations under the default settings. We also used default settings for MCMC scaling operators and move frequencies. We ran BAMM 23 times, each time under different conditions that might be appropriate for a medium-sized tree consisting of ~1,000 taxa. Runs tested different combinations of numbers of MCMC chains (2 or 4), temperature increment parameters ( $\Delta T = 0.05$  or  $0.1$ ) and expected number of diversification rate shifts (1, 5, 10, 15, 20, 25, 30, 35, 40 and 45). We tested the effect of changing the number of expected shifts—despite the `setBAMMpriors` function in `BAMMtools` recommending an input of just one expected shift—because preliminary runs suggested that the number of diversification rate shifts is greater than 20. For each analysis, we compared Bayes factors for competing prior models with different numbers of expected rate shifts.

#### ***h. Body shape trait data***

We pruned a body trait dataset to the 680 species that matched those in the 702-species UCE phylogeny<sup>36</sup>. The body shape dataset included maximum body depth, maximum fish width, head depth, lower-jaw length, mouth width, minimum caudal-peduncle depth, and minimum caudal-peduncle width. We measured maximum body depth as the maximum linear distance from the dorsal to ventral margin of the body, anywhere in the region between the posterior edge of the operculum to the anterior portion of the caudal peduncle. We measured maximum fish width as the maximum width anywhere along the body. We measured head depth as the vertical distance



from the dorsal to ventral margins of the head passing through the center of the eye. We measured lower jaw length as the linear distance from the anterior end of the lower jaw to the articular-quadrato joint. We measured mouth width as the linear distance between the left and right articular-quadrato joints. We measured minimum caudal peduncle depth as the minimum vertical distance from the dorsal to ventral margin of the caudal peduncle. We measured minimum caudal peduncle width as the narrowest point along the caudal peduncle. Lastly, we measured fish standard length as the linear distance from the anterior tip of the upper jaw to the posterior edge of the hypural plate or to the posterior end of the vertebral column (i.e., in species that lack a hypural plate). There were no repeat measurements for samples or species. We accounted for size by regressing log-transformed lengths against log-transformed standard fish length and calculating phylogenetic residuals using the `phyl.resid` function implemented in PHYTOOLS<sup>37</sup>. We used this matrix of residuals for seven traits for phylogenetic comparative analyses using a multivariate framework.

#### *i. Disparity through time analyses*

We assessed disparity through time (DTT) using the `dtc` function implemented in GEIGER<sup>38</sup>. We incorporated uncertainty in divergence times by repeating analyses across 100 trees randomly sampled from the posterior distribution. Since we were specifically interested in patterns around and following the K-Pg boundary, we summarized disparity through time in 1 My intervals as the proportion of trees in which the observed subclade disparity fell below that expected from a Brownian motion process (i.e., the expected pattern if the clade is undergoing significant between-clade ecological divergence) (results in Fig. 2 and Extended Data Fig. 8). Focusing on the time following the K-Pg boundary, we statistically summarized the 1 My time interval during which the observed subclade disparity first dropped below that expected from a Brownian motion process (results in Extended Data Fig. 8). We tested the sensitivity of disparity through time analyses to body shape traits and to the inclusion of major clades by repeating all analyses to the exclusion of clades that arose immediately around the K-Pg boundary and to the exclusion of each trait, as well as repeating the analyses for each trait separately in a univariate framework (results in Fig. 4). We also visualized the evolutionary histories of the following focal lineages using the `phenogram` function implemented in PHYTOOLS<sup>37</sup>: Carangiformes, Lophioidei, Perciformes, Scombriformes, “Squamipinnes” (here defined as the clade containing *Chaetodon*

*kleinii* and *Luvarus imperialis*), Syngnathiformes, and Tetraodontoidei. We visualized body shape morphospace using principal component analysis (PCA) with the *prcomp* function. Since the traits had different variances, we scaled all traits prior to performing PCA.

## 2. Fossil calibrations for relaxed clock BEAST analyses

**i. Node: Stem lineage Lampriformes**, dating the most recent common ancestor (MRCA) of *Lampris guttatus* and *Stylephorus chordatus*, which is the MRCA of Lampriformes and all other paracanthopterygians. *First occurrence*: †*Aipichthys minor*. Sannine Limestone, Hadjula, Lebanon. *Resolution in phylogenetic analyses*: †*Aipichthys minor* is resolved as a lampriform stem lineage in parsimony analyses of morphological characters<sup>39,40</sup>. *Stratigraphy*: The Hadjula fish beds are located below reported occurrence of *Mantelliceras mantelli*, which defines the first complete ammonite zone of the Late Cretaceous. The top of the *Mantelliceras mantelli* Zone is dated at 98.0 Ma<sup>41</sup>, from which we derive a minimum age for *Aipichthys*. *Minimum age*: 98.0 Ma. *Prior setting*: lognormal prior, minimum age 98.0 Ma, mean=1.0, S.D.=1.25, upper 95% CI: 119.0 Ma<sup>1</sup>.

**ii. Node: Stem lineage Polymixiiformes**, dating the MRCA of *Polymixia lowei* and *Aphredoderus sayanus*, which subtends the MRCA of *Polymixia* and Percopsiformes. *First occurrence*: †*Homonotichthys dorsalis*. Lower Chalk of Sussex and Kent, UK<sup>42</sup>. *Resolution in phylogenetic analyses*: none. *Character states*: four full-sized branchiostegals; anterior branchiostegals reduced and forming support for chin barbel<sup>42,43</sup>. *Stratigraphy*: middle-upper Cenomanian, zone of *Holoaster subglobosus*, corresponding to the late Cenomanian<sup>42,44,45</sup>. The minimal age for †*Homonotichthys dorsalis* is provided by the age of Cenomanian-Turonian boundary, which is dated as 93.9 Ma<sup>41</sup>. *Absolute age estimate*: 93.6 Ma (28). *Prior setting*: lognormal prior, minimum age 93.6 Ma, mean = 1.06, S.D.=1.25, upper 95% CI: 116.35 Ma<sup>3</sup>.

**iii. Node: Stem lineage Aphredoderidae**, dating the MRCA of *Aphredoderus sayanus* and *Typhlichthys subterraneus*, which subtends the MRCA of Aphredoderidae and Amblyopsidae. *First occurrence*: †*Trichophanes foliarum*. Florissant Formation, Colorado, USA<sup>46</sup>. *Resolution in phylogenetic analyses*: †*Trichophanes* and *Aphredoderus* form a clade in a maximum parsimony

analysis of 47 morphological characters<sup>47</sup>. *Character states*: ventral margins of lachrymal and infraorbitals spiny; alveolar process of premaxilla divided into separate segments<sup>46-48</sup>.

*Stratigraphy*: The upper Priabonian Florissant Roadcut is dated radiometrically using <sup>40</sup>Ar/<sup>39</sup>Ar isotope ratios as 34.07 Ma<sup>49</sup>. *Absolute age estimate*: 34.1 Ma. *Prior setting*: lognormal prior, minimum age 34.1 Ma, mean=1.0, S.D.= 1.347, upper 95% CI: 59.0 Ma<sup>7</sup>.

**iv. Node: Stem lineage *Zenopsis***, dating the MRCA of *Zenopsis* and *Zeus*. *First occurrence*: †*Zenopsis clarus*, †*Z. tyleri*, and †*Z. hoernesii*. Lower Maikopian series, Psheka Horizon of the Belaya River, Caucasus<sup>50</sup>, and Lower Dysodylic shales, Strujinoasa-Drăgușina and Piatra Neamț, Romania<sup>51</sup>; Lower Dysodylic shales, Piatra Neamț, Romania<sup>51</sup>; Laško (Tüffer), Slovenia<sup>51</sup>. *Resolution in phylogenetic analyses*: maximum parsimony analysis of 45 morphological characters resulted in a phylogeny where †*Zenopsis clarus*, †*Z. tyleri*, and †*Z. hoernesii*, and *Z. oblongus* are resolved in a clade<sup>52</sup>. *Character states*: slender lachrymal; pelvic-fin spines absent; buckler-like plates present along ventral midline of abdomen, and along dorsal ridge from middle of spinous to end of soft dorsal fin<sup>52</sup>. *Stratigraphy*: lower Rupelian [P18], lower Khadumian regional stage<sup>53</sup>. *Absolute age estimate*: 32.0 Ma<sup>54</sup>. *Prior setting*: lognormal prior, minimum age 32.0 Ma, mean=1.0, S.D.= 0.33, upper 95% CI: 36.7 Ma<sup>7</sup>.

**v. Node: Stem lineage Lampridae**, dating the MRCA of *Lampris guttatus* and *Zu elongatus*, which is the MRCA of Lampriformes. *First occurrence*: †*Turkmene finitimus*. Danatinsk Suite, Uyly-Kushlyuk locality, Turkmenistan<sup>55,56</sup>. *Resolution in phylogenetic analysis*: none. *Character states*: first dorsal fin pterygiophore strongly reclined posteriorly; enlarged pectoral fins inserting high on flank; shoulder girdle broad ventrally, with expanded coracoid; long parapophyses absent from abdominal vertebrae<sup>56</sup>. *Stratigraphy*: uppermost Thanetian-lowermost Ypresian<sup>57</sup>. *Absolute age estimate*: 55.8 Ma<sup>54</sup>. *Prior setting*: lognormal prior, minimum age 55.8 Ma, mean=1.0, S.D.= 1.411, upper 95% CI: 83.5 Ma<sup>7</sup>.

**vi. Node: Stem lineage Holocentridae**, dating the MRCA of *Myripristis violacea* and *Rondeletia loricata*, which subtends the MRCA of Holocentridae and Berycoidei. *First occurrence*: †*Stichocentrus liratus* from the Sannine Limestone, Hadjula, Lebanon<sup>58</sup>. *Resolution in phylogenetic analyses*: none. *Character states*: The penultimate anal-fin spine of

†*Stichocentrus* is enlarged and represents a synapomorphy of holocentroids<sup>43,59</sup>. *Stratigraphy*: See discussion for Calibration i, †*Aipichthys minor*. *Absolute age estimate*: 98.0 Ma. *Prior setting*: lognormal prior, minimum age 98.0 Ma, mean=1.0, S.D.= 0.8, upper 95% CI: 108.0 Ma<sup>1</sup>.

**vii. Node: Stem lineage Myripristinae**, dating the MRCA of *Myripristis violacea* and *Sargocentron coruscum*, which subtends the MRCA of Holocentridae. *First occurrence*: †*Eoholocentrum macrocephalum*, †*Berybolcensis leptacanthus*, and †*Tenuicentrum pattersoni*. Pesciara beds of ‘Calcarei nummulitici’, Bolca, Italy<sup>60-62</sup>. *Resolution in phylogenetic analyses*: analysis of 72 morphological characters resolve †*Eoholocentrum*, †*Berybolcensis*, and †*Tenuicentrum* as stem-lineage Myripristinae<sup>63</sup>. *Character states*: tooth-bearing platform expanded and overhangs lateral side of dentary near symphysis; premaxillary tooth field curves dorsally toward ascending process at symphysis; edentulous ectopterygoid (†*Berybolcensis* and †*Tenuicentrum*); spinous procurrent caudal-fin rays reduced to four in the upper and three in the lower lobe (†*Berybolcensis* and †*Tenuicentrum*)<sup>63</sup>. *Stratigraphy*: upper Ypresian [NP14]<sup>64,65</sup>. *Absolute age estimate*: 50 Ma<sup>54</sup>. *Prior setting*: lognormal prior, minimum age 50.0 Ma, mean=1.0, S.D.= 0.6, upper 95% CI: 57.3 Ma<sup>7</sup>.

**viii. Node: Crown lineage Syngnathiformes**, dating the MRCA of *Pegasus volitans* and *Syngnathus scovelli*, which subtends the MRCA of Syngnathiformes. *First occurrence*: †*Gasterorhamphosus zuppichinii*. “Calcarei di Melissano”, Porto Selvaggio, Lecce province, Italy<sup>66</sup>. *Resolution in phylogenetic analyses*: none, but Orr<sup>67</sup> argues that †*Gasterorhamphosus* is a stem lineage of a clade containing Macrorhamphosidae and Centriscidae. *Character states*: anal-fin spine absent; enlarged dorsal-fin spine with serrated posterior margin; elongated tubular snout; pleural ribs absent; cleithrum bears enlarged posterodorsal process; rod-like anteroventral process of coracoid; pectoral rays simple<sup>67,68</sup>. *Stratigraphy*: uppermost Campanian-lowermost Maastrichtia<sup>69</sup>. *Absolute age estimate*: 69.71 Ma<sup>1</sup>. *Prior setting*: lognormal prior, minimum age 69.71 Ma, mean=1.0, S.D.= 0.785, upper 95% CI: 79.6 Ma<sup>1</sup>.

**ix. Node: Stem lineage Centriscidae**, dating the MRCA of *Aeoliscus strigatus* and *Macroramphosus gracilis*, which subtends the MRCA of Centriscidae. *First occurrence*: †*Paramphisile weileri* and †*Paraeoliscus robinetae*. Pesciara beds of ‘Calcarei nummulitici’,

Bolca, Italy<sup>70</sup>. *Resolution in phylogenetic analyses*: none. *Character states*: caudal fin directed posteroventrally (†*Paraeoliscus*); dorsal spine jointed distally<sup>67</sup>. *Stratigraphy*: See discussion for Calibration viii †*Eoholocentrum macrocephalum*. *Absolute age estimate*: 50 Ma<sup>54</sup>. *Prior setting*: lognormal prior, minimum age 50.0 Ma, mean=1.0, S.D.= 0.6, upper 95% CI: 57.3 Ma<sup>7</sup>.

**x. Node: Crown lineage *Ariomma***, dating the MRCA of *Ariomma indica* and *A. melana*. *First occurrence*: †*Ariomma geslini* from the diatomites of St Eugène, Chelif Basin, Algeria<sup>5</sup>.

*Resolution in phylogenetic analyses*: none. *Character states*: extension of pleural ribs onto caudal vertebrae<sup>71,72</sup>, and a distinctive pattern of anal-fin skeleton shared with *A. bondi* and *A. melana*, consisting of anterior pterygiophores that bend posteriorly, overlapping the similarly curved shafts of successive pterygiophores<sup>72,73</sup>. *Stratigraphy*: Details presented in Friedman et al.<sup>5</sup>. *Absolute age estimate*: 5.94 Ma. *Prior setting*: lognormal prior, minimum age 5.94 Ma, mean=1.0, S.D.= 1.299, upper 95% CI: 28.96 Ma<sup>5</sup>.

**xi. Node: stem lineage Stromateidae**, dating the MRCA of *Pampus argenteus* and *Ariomma indica*, which subtends the MRCA Stromateidae and the clade that comprises *Ariomma* and Nomeidae. *First occurrence*: †*Pinichthys pulcher* from the Pshakha Horizon †*Planorbella* Beds, Lower Maikop Caucasus<sup>74</sup>. *Resolution in phylogenetic analyses*: none. *Character states*: †*Pinichthys* has a stellate, bony base of papillae in the region expected to bear pharyngeal sacs<sup>75</sup>. Synapomorphies of stromateiod displayed by †*Pinichthys* include: a continuous dorsal fin; a ventral articulation between the coracoid and ventral tip of the cleithrum; and an elongated first anal fin pterygiophore that is strongly reclined<sup>76</sup>. †*Pinichthys* differs from extant lineages of Stromateidae by having well-developed pelvic fins in adults and lacking extension of the first anal fin pterygiophore posterior to the first haemal spine<sup>5</sup>. †*Pinichthys* is interpreted as a stem-lineages stromateiod, which is consistent with previous interpretations<sup>74</sup> *Stratigraphy*: Details presented in Friedman et al.<sup>5</sup>. *Absolute age estimate*: 32.02 Ma. *Prior setting*: lognormal prior, minimum age 32.02 Ma, mean=1.0, S.D.= 1.2, upper 95% CI: 51.6 Ma<sup>5</sup>.

**xii. Node: stem lineage Chiasmodontidae**, dating the MRCA of *Kali kerberti* and *Tetragonurus atlanticus*, which subtends the MRCA of Chiasmodontidae and *Tetragonurus*. *First occurrence*: †*Bannikovichthys paelignus* from the fish-bearing laminates of Toricella Paligna, Italy<sup>77</sup>.

*Resolution in phylogenetic analyses:* none. *Character states:* The hypothesis that †*Bannikovichthys* is related to living Chiasmodontidae is based on an absence of scales, elongated opercles, delicate ossification of the interopercle and subopercle, and enlarged hourglass-shaped radials<sup>77</sup>. The relationships of †*Bannikovichthys* among living chiasmodontids is uncertain, so it is conservatively treated as a stem-lineage taxon<sup>5</sup>. *Stratigraphy:* Details presented in Friedman et al.<sup>5</sup>. *Absolute age estimate:* 11.9 Ma. *Prior setting:* lognormal prior, minimum age 11.9 Ma, mean=1.0, S.D.= 1.454, upper 95% CI: 41.56 Ma<sup>5</sup>.

**xiii. Node: within crown of *Scomber***, dating the MRCA of *Scomber australasicus* and *Scomber japonicus*. *First occurrence:* *Scomber colias* from the Raz-el-Ain, Oran, Algeria. *Resolution in phylogenetic analyses:* This fossil is attributed to the living species *Scomber colias*, which is resolved as the sister lineage of *S. japonicus* in a molecular phylogenetic analysis<sup>78</sup>. *Stratigraphy:* Details presented in Friedman et al.<sup>5</sup>. *Absolute age estimate:* 5.94 Ma. *Prior setting:* lognormal prior, minimum age 5.94 Ma, mean=1.0, S.D.= 1.255, upper 95% CI: 27.4 Ma<sup>5</sup>.

**xiv. Node: stem lineage *Scomber***, dating the MRCA of *Scomber australasicus* and *Rastrelliger kanagurta*. *First occurrence:* †*Scomber saadii* from the Padbeh Formation of Istehbanât, Iran<sup>79</sup>. *Resolution in phylogenetic analyses:* None. *Character states:* †*Scomber saadii* exhibits serrations on the teeth that is a synapomorphy of *Scomber*<sup>78,80</sup>. *Stratigraphy:* Details presented in Friedman et al.<sup>5</sup>. *Absolute age estimate:* 33.9 Ma. *Prior setting:* lognormal prior, minimum age 33.9 Ma, mean=1.0, S.D.= 1.02, upper 95% CI: 48.45 Ma<sup>5</sup>.

**xv. Node: stem lineage *Acanthocybium***, dating the MRCA of *Acanthocybium solandri* and *Scomberomorus maculatus*. *First occurrence:* †*Palaeocybium proosti* from the London Clay Formation, Isle of Sheppey, UK<sup>81</sup>. *Resolution in phylogenetic analysis:* none. *Character states:* †*Palaeocybium* and *Acanthocybium* share closely spaced teeth with blunt tips and the holotype specimen shows an elongate lower jaw that is similar to *Acanthocybium* and *Scomberomorus*<sup>82-84</sup>. *Stratigraphy:* Details presented in Friedman et al.<sup>5</sup>. *Absolute age estimate:* 50.5 Ma. *Prior setting:* lognormal prior, minimum age 50.5 Ma, mean=1.0, S.D.= 0.5, upper 95% CI: 56.72 Ma<sup>5</sup>.

**xvi. Node: stem lineage Sardini + Thunnini**, dating the MRCA of *Scomberomorus maculatus* and *Euthynnus affinis*. *First occurrence*: †*Eocoelopoma portentosum* from the Danatinsk Formation, Turkmenistan<sup>85</sup>. *Resolution in phylogenetic analyses*: None. *Character states*: Details presented in Friedman et al.<sup>5</sup>. *Stratigraphy*: Details presented in Friedman et al.<sup>5</sup>. *Absolute age estimate*: 54.17 Ma. *Prior setting*: lognormal prior, minimum age 54.17 Ma, mean=1.0, S.D.= 0.698, upper 95% CI: 62.71 Ma<sup>5</sup>.

**xvii. Node: stem lineage Thunnus**, dating the MRCA of *Thunnus orientalis* and *Auxis rochei*, which is the MRCA of Thunnini. *First occurrence*: †*Thunnus abchasicus* from the Kuma Horizon, Pshakha River, Caucasus<sup>86</sup>. *Resolution in phylogenetic analyses*: None. *Character states*: †*Thunnus abchasicus* exhibits several synapomorphies of *Thunnus* that include the presence of small oral teeth and the shortened preural vertebrae<sup>86</sup>. The presence of a spine in the second dorsal fin suggests that †*T. abchasicus* is a stem lineage *Thunnus*<sup>85</sup>. *Stratigraphy*: Details presented in Friedman et al.<sup>5</sup>. *Absolute age estimate*: 38.62 Ma. *Prior setting*: lognormal prior, minimum age 38.62 Ma, mean=1.0, S.D.= 0.91, upper 95% CI: 50.78 Ma<sup>5</sup>.

**xviii. Node: stem lineage Promethichthys**, dating the MRCA of *Promethichthys prometheus* and *Diplospinus multistriatus*. *First occurrence*: †*Hemithyrsites maicopicus* from the Upper Maikop of the Kurdzhips River, Adygea, Caucasus<sup>85</sup>. *Resolution in phylogenetic analyses*: None. *Character states*: Derived traits shared by *Promethichthys* and †*Hemithyrsites maicopicus* include reduction of the pelvic fin to a single spine and the presence of two pairs of dorsal and anal finlets<sup>85</sup>. *Stratigraphy*: Details presented in Friedman et al.<sup>5</sup>. *Absolute age estimate*: 15.97 Ma. *Prior setting*: lognormal prior, minimum age 15.97 Ma, mean=1.0, S.D.= 0.986, upper 95% CI: 29.67 Ma<sup>5</sup>.

**xix. Node: Stem lineage Channidae**, dating the MRCA of *Channa micropeltes* and *Helostoma temminckii*, which subtends the MRCA of Channidae and a clade containing Helostoma, Anabantidae, and Osphronemidae. *First occurrence*: †*Anchichanna kuldanensis* from the Ganda Kas Area, Kuldana Formation, Kala Chitta Hills, Pakistan<sup>87</sup>. *Resolution in phylogenetic analyses*: None. *Character states*: †*Anchichanna kuldanensis* exhibits the Channidae synapomorphy of the outer wall of the auditory bulla formed mainly by the prootic, but is likely

a stem-lineage taxon because it does not share synapomorphies with either *Channa* or *Parachanna*<sup>87</sup>. *Stratigraphy*: The Kuldana Formation and other vertebrate fossil localities of the Kala Chitta Hills straddle the Ypresian-Lutetian boundary<sup>88</sup>. *Absolute age estimate*: 41.3 Ma. *Prior setting*: lognormal prior, minimum age 41.3 Ma, mean=1.0, S.D.= 1.31, upper 95% CI: 64.7 Ma<sup>89</sup>.

**xx. Node: Stem lineage Sphyraenidae**, dating the MRCA of *Sphyraena jello* and *Lactarius lactarius*. *First occurrence*: †*Sphyraena bolcensis*, Pesciara beds of ‘Calcari nummulitici’, Bolca, Italy<sup>90,91</sup>. *Resolution in phylogenetic analyses*: None. *Character states*: three ‘T’-shaped, sutured predorsals or spineless pterygiophores<sup>92</sup>; elongate gape; upper jaw non-protrusible; enlarged fangs on dentary, premaxilla, and palatine. *Stratigraphy*: upper Ypresian [NP14]<sup>64,65</sup>. *Absolute age estimate*: 50.0 Ma<sup>65</sup>. *Prior setting*: lognormal prior, minimum age 50.0 Ma, mean=1.0, S.D.= 0.5999, upper 95% CI: 57.3 Ma<sup>93</sup>.

**xxi. Node: Stem lineage Mene**, dating the MRCA of *Mene maculata* and *Xiphias gladius*. *First occurrence*: †*Mene purdyi*, ‘Mancora Formation’, Perú<sup>94</sup>; †*M. triangulum*, Danatinsk Suite, Uyly-Kushlyuk locality, Turkmenistan<sup>55,57</sup>; and †*Mene* sp., ‘Stolle Klint clay’, Ølst Formation, Denmark<sup>95</sup>. *Resolution in phylogenetic analyses*: None. *Character states*: frontal vault; many small infraorbitals; all anal fin rays short, with anteriormost rays plate like; anal fin spines absent; postcleithrum broad and contacts first anal fin pterygiophore; disc-like body with deep ventral keel; greatly elongated second anal fin ray<sup>94</sup>. *Stratigraphy*: uppermost Thanetian-lowermost Ypresian [NP14]<sup>57,95</sup>. *Absolute age estimate*: 55.2 Ma<sup>96</sup>. *Prior setting*: lognormal prior, minimum age 55.2 Ma, mean=1.0, S.D.= 0.92, upper 95% CI: 67.5 Ma<sup>1,93</sup>.

**xxii. Node: Stem lineage Carangidae**, dating the MRCA of *Caranx caninus* and *Trachinotus goodei*, which subtends the MRCA of the clade comprising Carangidae, *Coryphaena*, *Rachycentron*, Scomberoidinae, and Trachinotinae. *First occurrence*: †*Archaeus oblongus*. Danatinsk Suite, Uyly-Kushlyuk locality, Turkmenistan<sup>55</sup>. *Resolution in phylogenetic analyses*: None. *Character states*: broad gap between second and third anal-fin spines<sup>97</sup>. *Stratigraphy*: uppermost Thanetian-lowermost Ypresian<sup>57</sup>. *Absolute age estimate*: 55.8 Ma<sup>54</sup>. *Prior setting*: lognormal prior, minimum age 55.8 Ma, mean=1.0, S.D.= 0.661, upper 95% CI: 63.9 Ma<sup>93</sup>.



**xxiii. Node: Stem lineage Caranginae**, dating the MRCA of *Caranx caninus* and *Seriola dumerili*, which subtends the MRCA of Carangidae. *First occurrence*: †*Eastmanalepes primaevus*, Pesciara beds of ‘Calcari nummulitici’, Bolca, Italy<sup>98</sup>. *Resolution in phylogenetic analyses*: None. *Character states*: lateral line scales modified as thick scutes<sup>97,99</sup>. *Stratigraphy*: upper Ypresian [NP14]<sup>64</sup>. *Absolute age estimate*: 49.0 Ma<sup>1</sup>. *Prior setting*: lognormal prior, minimum age 49.0 Ma, mean=1.0, S.D.= 0.1, upper 95% CI: 52.2 Ma<sup>1,93</sup>.

**xxiv. Node: Stem lineage Echeneioidei**, dating the MRCA of *Echeneis naucrates* and *Scomberoides lysan*, which subtends the MRCA of the clade comprising Echeneidae, *Coryphaena*, *Rachycentron*, Scomberoidinae, and Trachinotinae. *First occurrence*: †*Ductor vestenae* from the Pesciara locality of Bolca, Italy<sup>90,91</sup>. *Resolution in phylogenetic analyses*: parsimony and Bayesian analyses of morphology and combined molecular and morphological datasets resolve †*Ductor vestenae* as either a stem echeneioid or as the sister the clade containing *Rachycentron* and *Coryphaena*<sup>100</sup>. We follow the conservative consideration of †*Ductor vestenae* as a stem-lineage taxon, as used in Harrington et al.<sup>1</sup>. *Character states*: Discussed in Friedman et al.<sup>100</sup>. *Stratigraphy*: upper Ypresian [between NP14 and SPZ11]<sup>64</sup>. *Absolute age estimate*: 49.0 Ma<sup>1</sup>. *Prior setting*: lognormal prior, minimum age 49.0 Ma, mean=1.0, S.D.= 0.1, upper 95% CI: 52.2 Ma<sup>1</sup>.

**xxv. Node: Stem lineage Echeneidae**, dating the MRCA of *Echeneis naucrates* and *Coryphaena hippurus*, which subtends the MRCA of clade containing Echeneidae, *Coryphaena*, and *Rachycentron*. *First occurrence*: unnamed Echeneidae undet. from the Frauenweiler clay pit, Germany<sup>101</sup>. *Resolution in phylogenetic analyses*: None. *Character states*: no supraneurals; multiple anal fin pterygiophores insert anterior to first haemal spine; spinous dorsal fin modified as adhesion disc<sup>100,102</sup>. *Stratigraphy*: See discussion in Harrington et al.<sup>1</sup>. *Absolute age estimate*: 29.62 Ma<sup>1</sup>. *Prior setting*: lognormal prior, minimum age 29.62 Ma, mean=1.0, S.D.= 0.87, upper 95% CI: 41.0 Ma<sup>1</sup>.

**xxvi. Node: Stem lineage Scomberoides**, dating the MRCA of *Scomberoides lysan* and *Trachinotus goodei*, which subtends the MRCA of Scomberoidinae and Trachinotinae. *First*

*occurrence: Scomberoides spinosus* from the Upper Maikop at Chernaya Rechka, Caucasus<sup>57</sup>. *Resolution in phylogenetic analyses:* None. *Character states:* *Scomberoides spinosus* exhibits two synapomorphies of Scomberoidinae: 26 versus 24 vertebrae and posterior rays of the dorsal and anal fin developed as finlets<sup>97,99,103</sup>. *Stratigraphy:* See discussion in Harrington et al.<sup>1</sup>. *Absolute age estimate:* 19.3 Ma<sup>1</sup>. *Prior setting:* lognormal prior, minimum age 19.3 Ma, mean=1.0, S.D.= 1.095, upper 95% CI: 35.8 Ma<sup>1</sup>.

**xxvii. Node: Stem lineage Citharidae**, dating the MRCA of *Gymnachirus melas* and *Scophthalmus rhombus*, which subtends the MRCA of Citharidae and all other pleuronectoids except *Psettodes*. *First occurrence:* †*Eobothus minimus* from the Pesciara beds of ‘Calcari nummulitici’, Bolca, Italy<sup>104,105</sup>. *Resolution in phylogenetic analyses:* †*Eobothus* is the sister lineage of *Citharus*<sup>104</sup>. *Character states:* complete orbital asymmetry; dorsal fin extends above orbit; hook-shaped urohyal; parahypural not in articulation with pural centrum 1; long neural spine on preural centrum 2<sup>104</sup>. *Stratigraphy:* See discussion in Harrington et al.<sup>1</sup>. *Absolute age estimate:* 49.0 Ma<sup>1</sup>. *Prior setting:* lognormal prior, minimum age 49.0 Ma, mean=1.0, S.D.= 0.68, upper 95% CI: 57.3 Ma<sup>1</sup>.

**xxviii. Node: Stem lineage of the clade containing Soleidae and Cynoglossidae**, dating the MRCA of *Aseraggodes xenicus* and *Poecilopsetta plinthus*. *First occurrence:* †*Eobuglossus eocenicus* from the Mokkatam Formation, Djebel Turah, Egypt<sup>106</sup>. *Resolution in phylogenetic analyses:* none. *Character states:* †*Eobuglossus* shows derived cranial features limited to Soleidae, including blind side preopercular canal terminating on ventral margin of preopercular and convex portion of blind side dentary anterior to angulo-articular<sup>106,107</sup>. *Stratigraphy:* See discussion in Harrington et al.<sup>1</sup>. *Absolute age estimate:* 41.2 Ma<sup>1</sup>. *Prior setting:* lognormal prior, minimum age 41.9 Ma, mean=1.0, S.D.= 0.4, upper 95% CI: 46.4 Ma<sup>1</sup>.

**xxix. Node: Stem lineage Bothidae**, dating the MRCA of *Bothus pantherinus* and *Cyclopsetta frimbriata*, which subtends the MRCA of the clade containing Bothidae and Cyclosettidae. *First occurrence:* †*Oligobothus pristinus* from the Lower Dysodilic shales, Piatra Neamț, Romania<sup>108</sup>. *Resolution in phylogenetic analyses:* None. *Character states:* myorhabdoi present<sup>108</sup>. *Stratigraphy:* See discussion in Harrington et al.<sup>1</sup>. *Absolute age estimate:* 29.62 Ma<sup>1</sup>.

*Prior setting:* lognormal prior, minimum age 29.62 Ma, mean=1.0, S.D.= 0.06, upper 95% CI: 32.6 Ma<sup>1</sup>.

**xxx. Node: Stem lineage Pleuronectidae**, dating the MRCA of *Pleuronichthys cornutus* and *Paralichthys albigutta*, which subtends the MRCA of the clade containing Pleuronectidae and Paralichthyidae. *First occurrence:* †*Oligopleuronectes germanicus* from the Frauenweiler fossil site, Germany<sup>109</sup>. *Resolution in phylogenetic analyses:* None. *Character states:* Suggested as a member of Pleuronectidae based on †*Oligopleuronectes* being right-eyed and having a lateral process on the eye-side frontal<sup>109,110</sup>. *Stratigraphy:* See discussion in Harrington et al.<sup>1</sup>. *Absolute age estimate:* 29.62 Ma<sup>1</sup>. *Prior setting:* lognormal prior, minimum age 29.62 Ma, mean=1.0, S.D.= 0.45, upper 95% CI: 35.3 Ma<sup>1</sup>.

**xxxi. Node: Stem lineage Bothus**, dating the MRCA of *Bothus pantherinus* and *Crossorhombus azureus*. *First occurrence:* *Bothus* sp. from the Middle Tsurevsky Member of the Tsurevsky Formation along the bank of the Psheka River, Caucasus<sup>111</sup>. *Resolution in phylogenetic analyses:* None. *Character states:* A specific affinity to *Bothus* is supported by the presence of robust rectangular haemal spines<sup>111,112</sup>. *Stratigraphy:* See discussion in Harrington et al.<sup>1</sup>. *Absolute age estimate:* 11.056 Ma<sup>1</sup>. *Prior setting:* lognormal prior, minimum age 29.62 Ma, mean=1.0, S.D.= 0.84, upper 95% CI: 39.9 Ma<sup>1</sup>.

**xxxii. Node: Stem lineage Pseudocrenilabrinae**, dating the MRCA of *Bathybates minor* and *Amphilophus citrinellus*, which subtends the MRCA of the clade that contains Pseudocrenilabrinae and Cichlinae. *First occurrence:* †*Mahengechromis plethos* from Mahenge, Tanzania<sup>113</sup>. *Resolution in phylogenetic analyses:* Several phylogenetic resolutions of †*Mahengechromis* place the taxon as either a crown lineage Cichlidae or crown lineage Pseudocrenilabrinae<sup>113,114</sup>. We follow Rabosky et al.<sup>89</sup> in conservatively treating †*Mahengechromis* as a stem-lineage Pseudocrenilabrinae. *Character states:* The identification of †*Mahengechromis* as a cichlid is supported by the morphology of the lower pharyngeal jaw, squamation, and meristics of vertebrae and median fins<sup>113-115</sup>. *Stratigraphy:* The Mahenge fossil deposits accumulated in a crater formed by intrusion of kimberlite and U-Pb of a zircon crystal dates the formation of the kimberlite at 45.83 +/-0.17 Ma<sup>116</sup>. Because the lacustrine sediments

predate the kimberlite emplacement it was suggested the age of the fossil deposits are 0.2 to 0.1 Ma younger<sup>116,117</sup>. We use the conservative date of 45 Ma used in Rabosky et al.<sup>89</sup>. Absolute age estimate: 45.0 Ma. *Prior setting*: lognormal prior, minimum age 45.0 Ma, mean=1.0, S.D.= 1.29, upper 95% CI: 67.3 Ma.

**xxxiii. Node: Crown lineage Exocetoidei**, dating the MRCA of *Xenentodon cancila* and *Hemiramphus far*, which subtends the MRCA of Belonidae and Hemiramphidae. *First occurrence*: †*Rhamphexocoetus volans* from Pesciara beds of ‘Calcari nummulitici’, Bolca, Italy<sup>118</sup>. *Resolution in phylogenetic analyses*: None. *Character states*: lower jaw symphysis extended; ventral lobe of caudal fin enlarged relative to dorsal lobe; pectoral fins greatly expanded<sup>119-121</sup>. *Stratigraphy*: upper Ypresian [NP14]<sup>64,65</sup>. *Absolute age estimate*: 49.0 Ma<sup>3</sup>. *Prior setting*: lognormal prior, minimum age 49.0 Ma, mean=1.0, S.D.= 1.49, upper 95% CI: 80.52 Ma<sup>3</sup>.

**xxxiv. Node: Stem lineage Calotomus (Labridae)**, dating the MRCA of *Calotomus spinidens* and *Sparisoma radians*. *First occurrence*: †*Calotomus preisli* from the Leitha Limestone, St. Margarethen, Austria<sup>122</sup>. *Resolution in phylogenetic analyses*: None. *Character states*: Presence of upper pharyngeal bones bearing 1 to 3 rows of teeth and presence of a lateral canine on the premaxilla are synapomorphies for Scarinae. A conical tooth on the medial face of the premaxilla is a synapomorphy of *Calotomus*<sup>122</sup>. *Stratigraphy*: The Leitha Limestone is constrained by calcareous nannofossils to the standard biozone NN6<sup>122</sup>, which is entirely in the Serravallian stage of the Miocene. The top of NN6 is dated at 11.9 Ma<sup>3</sup>. *Absolute age estimate*: 11.9 Ma<sup>3</sup>. *Prior setting*: lognormal prior, minimum age 11.9 Ma, mean=1.0, S.D.= 1.501, upper 95% CI: 43.95 Ma<sup>3</sup>.

**xxxv. Node: Stem lineage Luvaridae**, dating the MRCA of *Luvarus imperialis* and *Acanthurus bahianus*, which subtends the MRCA of *Luvarus* and the clade containing *Zanclus cornutus* and Acanthuridae. *First occurrence*: †*Avitoluvarus diana*, †*A. mariannae*, †*Kushlukia permira*, and †*Luvarus necopinatus*. Danatinsk Suite, Uyly-Kushlyuk locality, Turkmenistan<sup>123</sup>. *Resolution in phylogenetic analyses*: a parsimony analysis of morphological characters resolves a clade that contains †*Avitoluvarus*, †*Kushlukia*, †*Luvarus necopinatus*, and *L. imperialis*, which is sister to a

clade comprising *Zanclus* and Acanthuridae<sup>123</sup>. *Character states*: median pterygial truss surrounding most of body; two or fewer dorsal-fin spines; no anal-fin spines; distal end of first anal-fin pterygiophore greatly elongated anteriorly; hypurals 1-4 fused; caudal fins broadly overlap hypural(s); pelvic fin rudimentary in adults; teeth absent or greatly reduced<sup>123</sup>.

*Stratigraphy*: uppermost Thanetian-lowermost Ypresian<sup>57</sup>. *Absolute age estimate*: 55.8 Ma<sup>54</sup>.

*Prior setting*: lognormal prior, minimum age 55.8 Ma, mean=1.0, S.D.= 0.661, upper 95% CI: 63.9 Ma<sup>7</sup>.

**xxxvi. Node: Stem lineage Acanthurinae**, dating the MRCA of *Acanthurus bahianus* and *Naso unicornis*, which subtends the MRCA of Acanthuridae. *First occurrence*: †*Proacanthurus tenius* from the ‘Pesciara beds of ‘Calcari nummulitici’, Bolca, Italy<sup>124</sup>. *Resolution in phylogenetic analyses*: None. *Character states*: caudal peduncle bears folding spine<sup>124</sup>. *Stratigraphy*: upper Ypresian [NP14]<sup>64</sup>. *Absolute age estimate*: 50 Ma<sup>64</sup>. *Prior setting*: lognormal prior, minimum age 50.0 Ma, mean=1.0, S.D.= 0.6, upper 95% CI: 57.3 Ma<sup>93</sup>.

**xxxvii. Node: Stem lineage Siganidae**, dating the MRCA of *Siganus spinus* and *Scatophagus argus*. *First occurrence*: †*Siganopygaeus rarus*. Danatinsk Suite, Uylya-Kushlyuk locality, Turkmenistan<sup>125</sup>. *Resolution in phylogenetic analyses*: parsimony analysis of morphological characters resolves four Eocene and Oligocene taxa, including †*Siganopygaeus*, as stem-lineage Siganidae<sup>125</sup>. *Character states*: two pelvic-fin spines; seven or more anal-fin spines; ten or fewer anal-fin rays<sup>125</sup>. *Stratigraphy*: uppermost Thanetian-lowermost Ypresian<sup>57</sup>. *Absolute age estimate*: 55.8 Ma<sup>54</sup>. *Prior setting*: lognormal prior, minimum age 55.8 Ma, mean=1.0, S.D.= 0.661, upper 95% CI: 63.9 Ma<sup>7</sup>.

**xxxviii. Node: Stem lineage of Chaetodontidae**, dating the MRCA of *Chaetodon kleinii* and *Leiognathus equula*, which subtends the MRCA of the clade that contains Chaetodontidae and Leiognathidae. *First occurrence*: Chaetodontidae cf. *Chaetodon* (tholichthys-stage larvae) from the ‘Fish shales’, Frauenweiler clay pit, Germany<sup>101,126</sup>. *Resolution in phylogenetic analyses*: None. *Character states*: overlapping, sequential articulation between first dorsal fin pterygiophores, supraneurals, and supraoccipital crest; second infraorbital excluded from orbital margin; two sets of lateral processes on each side of first dorsal fin pterygiophore define a clear

groove; distal head of second supraneural longer than that of first supraneural<sup>126-128</sup>.

*Stratigraphy*: The ‘Fish shales’ lie within NP23<sup>109</sup>. *Absolute age estimate*: 29.62 Ma<sup>3</sup>. *Prior setting*: lognormal prior, minimum age 29.62 Ma, mean=1.0, S.D.= 1.498, upper 95% CI: 61.6 Ma<sup>3</sup>.

**xxxix. Node: Stem lineage *Chaetodon***, dating the MRCA of *Chaetodon kleinii* and *Prognathodes marcellae*. *First occurrence*: †*Chaetodon fischeuri* from the Saint-Denis du Sig, Raz-el-Aïn, Les Planteurs, and Eugène, Algeria<sup>127</sup>. *Resolution in phylogenetic analyses*: None. *Character states*: overlapping, sequential articulation between first dorsal fin pterygiophores, supraneurals, and supraoccipital crest; second infraorbital excluded from orbital margin; two sets of lateral processes on each side of first dorsal fin pterygiophore define a clear groove; distal head of second supraneural longer than that of first supraneural<sup>127,128</sup>. *Stratigraphy*: Messinian<sup>129-131</sup>. *Absolute age estimate*: 7.1 Ma. *Prior setting*: lognormal prior, minimum age 7.1 Ma, mean=0.26, S.D.= 0.2, upper 95% CI: 8.9 Ma<sup>7</sup>.

**xl. Node: Stem lineage *Gazza***, dating the MRCA of *Gazza minuta* and *Leiognathus equula*. *First occurrence*: †*Euleiognathus tottori* from the Iwami Formation, Tottori Group, Japan<sup>132,133</sup>. *Resolution in phylogenetic analyses*: none. *Character states*: long ascending processes of premaxillae; paddle-like expansions of neural and haemal spine of preural centrum 4; single supraneural; serrated anterior margins of fin spines; caniniform teeth<sup>134</sup>. The final character is unique to *Gazza* within leiognathids<sup>132,135</sup>. The nesting of *Gazza* within the phylogeny of Leiognathidae indicates caniniform teeth are derived within the clade<sup>134,136,137</sup>. See Gill and Michalski<sup>138</sup> who are sceptical that †*Euleiognathus* is a leiognathid. *Stratigraphy*: middle Miocene<sup>132,133</sup>. *Absolute age estimate*: 11.6 Ma<sup>139</sup>. *Prior setting*: lognormal prior, minimum age 11.6 Ma, mean=0.8, S.D.= 1.0, upper 95% CI: 23.1 Ma<sup>7</sup>.

**xli. Node: Stem lineage Diodontidae**, dating the MRCA of *Diodon liturosus* and *Canthigaster rostrata*, which subtends the MRCA of Diodontidae and Tetraodontidae. *First occurrence*: †*Prodiodon tenuispinus*, †*P. erinaceus*, †*Heptadiodon echinus*, and †*Zignodon fornasieroae* from the Pesciara beds of ‘Calcarei nummulitici’, Bolca, Italy<sup>140</sup>. *Resolution in phylogenetic analyses*: parsimony analysis of morphological characters resolves a clade containing

†*Prodiodon tenuispinus*, †*P. erinaceus*, †*Heptadiodon echinus*, †*Zignodon fornasieroae*, *Diodon holocanthus*, and *Chilomycterus schoepfi*<sup>140</sup>. *Character states*: premaxillae fused along midline; dentaries fused along midline; jaws massive<sup>140</sup>. *Stratigraphy*: upper Ypresian [NP14]<sup>64</sup>. *Absolute age estimate*: 50 Ma<sup>54</sup>. *Prior setting*: lognormal prior, minimum age 50.0 Ma, mean=1.0, S.D.=0.6, upper 95% CI: 57.3 Ma<sup>7</sup>.

**xlii. Node: Stem lineage of Balistidae**, dating the MRCA of *Balistes capriscus* and *Aluterus monoceros*, which subtends the MRCA of Balistidae and Monacanthidae. *First occurrence*: †*Gornylistes prodigiosus* from the Kuma Horizon, Krasnodar Region, Caucasus<sup>141</sup>. *Resolution in phylogenetic analyses*: None. *Character states*: ventral shaft of second spine-bearing dorsal pterygiophore absent; supraneural strut present between abdominal neural spine and final spine-bearing dorsal pterygiophore; four anal-fin pterygiophores anterior to the haemal spine of the third caudal vertebra<sup>140</sup>. *Stratigraphy*: Bartonian [NP17] Kumian regional stage<sup>53</sup>. *Absolute age estimate*: 37.2 Ma<sup>54</sup>. *Prior setting*: lognormal prior, minimum age 37.2 Ma, mean=1.0, S.D.=0.42, upper 95% CI: 42.6Ma<sup>7</sup>.

**xliii. Node: Stem lineage Antennarioidei**, dating the MRCA of *Antennarius striatus* and *Ogcocephalus radiatus*. *First occurrence*: †*Eophryne bartutii* from the Pesciara beds of ‘Calcari nummulitici’, Bolca, Italy<sup>142</sup>. *Resolution in phylogenetic analyses*: None. †*Eophryne* was hypothesized to share common ancestry with Antennariidae based on overall morphological similarity<sup>142</sup>. The phylogenetic placement used for this calibration is conservatively applied to the more inclusive Antennarioidei. *Character states*: triradiate ectopterygoid; spatulate postmaxillary process of premaxilla<sup>142-144</sup>. *Stratigraphy*: upper Ypresian [NP14]<sup>64</sup>. *Absolute age estimate*: 50 Ma<sup>54</sup>. *Prior setting*: lognormal prior, minimum age 50.0 Ma, mean=1.0, S.D.=0.6, upper 95% CI: 57.3 Ma<sup>93</sup>.

### 3. Supplementary results and discussion

#### a. Phylogenetic analyses

The maximum likelihood analyses of the 702-taxon and 1,084-taxon UCE datasets confidently resolve the phylogenetic relationships of all sampled acanthomorph families. The phylogeny

inferred from the IQ-TREE analysis of the single-partition, concatenated 1,084-taxon dataset is represented in Supplementary Figs. 1–25. The results of the five other phylogenetic analyses are available on Dryad. Bootstrap support values across the entire IQ-TREE phylogeny are high, with most nodes being supported by 100% bootstrap support and only 76 of 1,107 nodes (6.87%) having values  $\leq 100\%$ . Tree topologies inferred using the different methods described in *Section 1d* are largely consistent according to comparisons conducted in TOPD-FMITS v.4.6<sup>21</sup> (see Supplementary Table 2). Robinson-Foulds metrics across all comparisons were low ( $\leq 0.033$ ), as were nodal distances ( $\leq 1.046$ ). Supplementary Table 2 lists the 19 species that differ in their phylogenetic relationships across the different analyses. Most of these species are found in areas of the tree that have been historically difficult to resolve, such as Anthiadidae (previously Anthiaginae classified in Serranidae), Carangidae and Apogonidae. Tree topologies inferred in IQ-TREE and RAxML using multiple-partition, 700-taxon alignments were identical.

The summary species tree inferred using coalescent methods from individual gene trees (Extended Data Fig. 2) largely corroborates the relationships among the most inclusive lineages of acanthomorphs inferred from the concatenated datasets (Figs. 1,2, Supplementary Figs. 1-25), such as in the resolution of Lampriformes as the sister lineage of a monophyletic Paracanthopterygii and the monophyly of Acanthopterygii. There remain notable topological differences between the concatenated and coalescent approaches. The few nodes in the concatenated dataset phylogenies with moderate bootstrap support are often incongruent with the summary species tree, but discordance also occurs at nodes with 100% BSS. The ASTRAL-III species tree differs from the concatenated-dataset, maximum likelihood phylogeny in the inference of Trachichthyiformes and Beryciformes as a clade that is sister to Percomorpha, the gadiform *Bregmaceros* as the sister lineage of a clade containing *Stylephorus* and all other gadiforms, the placement of *Centrogenys* outside of Labriformes, the position of *Pholidichthys* as the second earliest-diverging blenniform lineage (with Polycentridae sister to Cichlidae), and the non-monophyly of Acropomatiformes (Extended Data Fig. 2). The ASTRAL-III species tree also does not resolve Gerreidae as the sister lineage of all other Acanthuriformes. Further, the phylogenetic placement of major euperuvian clades differ in the summary tree estimated under the multi-species coalescent model.

In contrast to the concatenated-dataset trees, support for the summary species tree is globally low, including for relationships that are classical expectations from pre-phylogenetic



classifications and are resolved in numerous other molecular phylogenetic analyses of acanthomorphs. This pattern is reflective of conflict among gene trees, an expected result given the low phylogenetic informativeness of individual UCE loci<sup>145-147</sup>, particularly at deep time scales<sup>148</sup>. Bayesian estimation of genome-wide concordance factors through BUCKy allow for the examination of the conflict among gene trees at some focal nodes. For example, BUCKy analyses corroborate the monophyly of a clade containing Beryciformes and Percomorpha (Figs. 1, 3c) despite the resolution of a clade containing Beryciformes and Trachichthyiformes in the ASTRAL-III summary tree. For other relationships such as the sister lineage of Acanthopterygii, the BUCKy concordance factor analyses fail to provide confident gene-tree support for all topologies, even those found in both the coalescent- and concatenated-based analyses (Figs. 1,3b and Extended Data Fig. 2).

Further, for the relationships tested with BUCKy and for the branches that differ between the IQ-TREE (Figs. 1,2 and Supplementary Figs. 1–25) and ASTRAL-III (Extended Data Fig. 2) topologies, IQ-TREE site-concordance factor (sCF) values tend to be similar to or lower than the support for alternate topologies (see relevant file in the Dryad repository). Some important relationships such as the monophyly of Paracanthopterygii, its sister relationship to Lampriformes, the common ancestry of *Polymixia* and Percopsiformes, and the position of *Centrogenys* as sister to Labridae have notably higher gene concordance factor (gCF) estimates than the gene discordance factor (gDF) values despite similarities in site support (sDF) for one or more discordant topologies. The effects of ILS are expected to be greater on the branches of other major relationships where  $sCF < 0.33\%$  and  $gCF \leq gDF$  or there is a large difference between  $sDF1$  and  $sDF2$ <sup>260</sup>. Examples include the placement of *Acanthistius* as the earliest-diverging perciform lineage ( $gCF=gDF1=0.11\%$ ;  $sCF=30.61\%$ ;  $sDF1=47.77\%$ ;  $sDF2=21.61\%$ ), the sister relationship between Beryciformes and Percomorpha ( $gCF=4.18\%$ ;  $gDF1=5.2\%$ ;  $sCF=28.63\%$ ;  $sDF1=46.96\%$ ;  $sDF2=24.41\%$ ), and the common-ancestry of Scombriformes and Syngnathiformes ( $gCF=1.42\%$ ;  $gDF1=0.1\%$ ;  $sCF=27.22\%$ ;  $sDF1=49.31\%$ ;  $sDF2=23.46\%$ ). Such branches might be indicative of the anomaly zone and require further examination<sup>260,261</sup>; for these cases, phylogenetic inference using maximum parsimony may be more appropriate than a maximum likelihood or summary species tree approach<sup>261</sup>.

Overall, the strong site support for competing topologies suggests that discordance among gene trees and sites may be partially influenced by ILS, particularly for the branches with

low bootstrap support or those that differ between the ASTRAL-III and IQ-TREE analyses. This result is not unexpected, as incomplete lineage sorting is especially prevalent at deep-time scales in UCE datasets<sup>145</sup> and a number of discrepancies between the presented topologies represent early-diverging relationships. Much of the supposed ILS is likely due to short branches<sup>260,261</sup> at these deep time scales as the maximum likelihood concordance factors are correlated to branch length with a moderate effect size (see legend of Extended Data Fig. 1). In fact, the average length of the branches with site discordance factor (sDF) estimates higher than the sCF values (as shown in Figs. 1,2) and those with sCF values similar to the sDF estimates (i.e. no greater than 15%) is 0.0026 substitutions per sequence site. In contrast, the average branch length for the entire UCE phylogeny is 0.011 substitutions per site. That said, it would be unwise to disregard the potential effects of other drivers of low gene or site support such as missing data or a lack of strong signal among genes and sites.

***b. Classification of Acanthomorpha and a new delimitation of taxonomic orders in Percomorpha***

The non-percomorph acanthomorphs are classified into eight taxonomic orders: Lampriformes, Percopsiformes, Polymixiiformes (a single genus, *Polymixia*) Zeiformes, Gadiformes, Stylephoriformes (a single species, *Stylephorus chordatus*), Trachichthyiformes, and Beryciformes (Fig. 1). The new UCE-inferred phylogeny provides an opportunity to reevaluate the classification of Percomorpha to identify inclusive taxonomic groupings that reflect phylogenetic relationships. An initial effort at building classifications based on molecular phylogenies attempted to preserve the ordinal ranks of the clades such as the Pleuronectiformes, Tetraodontiformes, Atheriniformes, and Synbranchiformes<sup>149</sup>. This classification proposed a delimitation of 33 taxonomic orders in Percomorpha that each contain an average of only 7.4 families and 492.9 species, and resulted in 10% of all percomorph families unassigned to a taxonomic order<sup>149</sup>. In Figs. 1–2 and Supplementary Table 3 we offer an alternative delimitation of 13 clades that we treat as taxonomic orders to accommodate the classification of all 290 percomorph families. In the proposed classification, each taxonomic order comprises an average 2,226.8 species and 18.2 families.

The names of the orders in the proposed percomorph classification are consistent with conventions in ichthyological systematics by establishing a link with one of the constituent

taxonomic families and using the “-iformes” suffix<sup>150,151</sup>. For example, this delimitation of Blenniiformes includes the Blenniidae and 48 other families (e.g., cichlids, livebearers, and mullets) that were previously identified as a monophyletic group in molecular phylogenetic studies<sup>3,8,93,152-154</sup>. Previously named Ovalentaria<sup>154</sup>, this diverse clade of percomorphs had been divided among seven orders<sup>149</sup>, one of which, Mugiliformes, included a single family, Mugilidae (mulletts).

## **b. Phylogeny of non-percomorph acanthomorphs**

### ***i. Monophyly and relationships of Paracanthopterygii***

Similar to other phylogenomic studies, this UCE inferred phylogeny resolves a monophyletic Paracanthopterygii that includes *Polymixia* (beardfishes), Percopsiformes, Zeiformes, *Stylephorus chordatus* (Tube-eye), and Gadiformes (Fig. 1, Supplementary Fig. 1)<sup>3,8,155</sup>. While relationships within Paracanthopterygii differ among phylogenomic studies, the resolution of a clade containing *Polymixia* and Percopsiformes is the best-supported topology in the Bayesian concordance factor analysis, with the 95% credible interval of the two alternative resolutions of *Polymixia* not overlapping with the optimal tree topology (Fig. 3a, Supplementary Fig. 1). Results from the IQ-TREE, maximum likelihood concordance factor analyses also support a sister relationship between *Polymixia* and Percopsiformes (gCF = 15.87%, sCF = 37.78%) as opposed to alternative resolutions (e.g. gDF2 = 6.03, sDF2 = 34.58). There is a relatively low percentage of loci and sites supporting a clade containing *Polymixia* and Percopsiformes, and a chi-squared test comparing the number of genes supporting discordant topologies (gEF\_p = 0.27) suggests that incomplete lineage sorting may contribute to discordance along this branch of the acanthomorph phylogeny.

### ***ii. Phylogenetic relationships of Lampriformes***

The new UCE phylogeny of Acanthomorpha resolves Lampriformes as the sister lineage of Paracanthopterygii (Fig. 1), which agrees with a previous phylogenetic analysis of UCE loci<sup>3</sup>. Other studies offer conflicting phylogenetic positions for Lampriformes; a phylogenomic analysis of ~1,000 exons resolve lampriforms as the sister lineage of the Acanthopterygii<sup>8</sup>, while morphological phylogenies place the lampriforms as the sister lineage of all other Acanthomorpha<sup>156</sup>. The Bayesian concordance factor analyses result in overlapping 95%

credible intervals for the phylogeny that places lampriforms as sister to Paracanthopterygii and the phylogeny that resolves lampriforms as the sister lineage of all other acanthomorphs (Fig. 3b). The phylogeny that resolves lampriforms and Acanthopterygii as sister lineages scored the lowest Bayesian concordance factors and the 95% credible interval of its concordance factors do not overlap with the credible interval of the phylogeny that resolves Lampriformes as the sister lineage of Paracanthopterygii (Fig. 3b). Results of the maximum likelihood gene- and site-concordance factor analyses are the inference from BUCKy, as support for alternate topologies via discordance factors (e.g. sCF1 = 2.68%, sCF2 = 34.59%) are similar to the percent of genes supporting a sister relationship between Lampriformes and Paracanthopterygii (gCF = 6.08%, sCF = 33.65%).

### ***iii. Phylogenetic relationships of Gadiformes***

The new UCE phylogeny of Gadiformes is similar to a recent study that utilized DNA sequences from more than 14,000 portions of protein coding genes<sup>157</sup>. Results from the two analyses are congruent in resolving *Bregmaceros* (codlets) as the sister lineage of all other Gadiformes, though this is not the topology most supported by the maximum likelihood concordance factor analyses (gCF = 34.83%, sCF = 40.48%, gDF2 = 37.08%, sDF2 = 43.45%). The two studies differ in three specific relationships. The UCE phylogeny resolves Muraenolepididae (eel cods) and Trachyrincidae (armored grenadiers) as sister lineages, but the exon phylogeny resolves *Melanonus* (pelagic cods) as the sister lineage of Muraenolepididae. The UCE phylogeny places Merlucciidae (merluccid hakes) as the sister lineage of an inclusive clade containing Phycidae (phycid hakes), Lotidae (hakes and burbots), and Gadidae (cods and haddocks), but the exon phylogeny resolves Merlucciidae as the sister lineage of a clade containing *Eulichthys polynemus* (Eucla cod), Muraenolepididae, *Melanonus*, Trachyrincidae, Moridae, *Macruronus* (blue grenadiers), *Lyconus* (Atlantic hakes), Bathygadidae (rattails), *Steindachneria argenta*, and Macrouridae. Lotidae is resolved as monophyletic in the exon phylogeny<sup>157</sup>, but this lineage is paraphyletic in the UCE phylogeny with *Lota lota* (Burbot) resolved as the sister lineage of a clade containing *Brosme brosme* (Cusk), *Molva* (lings), and Gadidae (true cods) (Fig. 1, Supplementary Fig. 1).

#### ***iv. Phylogenetic relationships of Acanthopterygii and resolution of the sister lineage of the hyper-diverse Percomorpha***

Acanthopterygii includes Trachichthyiformes, Beryciformes, and Percomorpha (Fig. 1). The earliest molecular studies identified the sister lineage of percomorphs as either a monophyletic group consisting of Trachichthyiformes and Beryciformes<sup>7,93</sup> or the beryciform subclade Holocentridae (squirrelfishes)<sup>152</sup>. The UCE inferred phylogeny presented in this study and previous phylogenomic analyses resolve Trachichthyiformes as the sister lineage to all other acanthopterygians and Beryciformes, which includes Holocentridae, as the percomorph sister lineage<sup>3,8,155,158</sup> (Fig. 1, Supplementary Fig. 2). This topology is also the most supported hypothesis in the Bayesian concordance factor analyses (Fig. 3c). The alternative hypotheses, including the phylogeny that places Holocentridae as sister to Percomorpha, produced substantially lower Bayesian concordance factor scores with 95% credible intervals that do not overlap with the scores of the optimal phylogeny (Fig. 3c). The UCE data presented here reject the hypothesis that Holocentridae is the sister lineage of Percomorpha.

#### ***c. Phylogenetic relationships of Percomorpha***

Percomorphs are classified in an astounding 290 taxonomic families<sup>159</sup>, which is more than living birds (252 families) and many more than mammals (167 families), squamates (58 families), amphibians (67 families), and turtles (11 families)<sup>160-162</sup>. By the middle of the 20th century the vast majority of percomorph families were delimited and considered monophyletic groups<sup>150,163</sup>, but relationships among these delimited taxonomic families were woefully unresolved at the start of the 21st century<sup>164,165</sup>. This lack of phylogenetic resolution among the nearly 300 taxonomic families led to the now famous analogy that Percomorpha was the “bush at the top” of the teleost phylogeny<sup>166</sup>. Since the start of the 21st century, however, molecular studies have offered dramatic resolution of percomorph relationships<sup>3,8,93,152</sup>. The UCE phylogeny inferred in this study resolves the species sampled from 276 taxonomic families into one of twelve taxonomic orders that contain more than one family. All 12 of these inclusive lineages are monophyletic and strongly supported in the UCE phylogeny (Figs. 1,2, Supplementary Figs. 3–25). Relationships are consistent with previous efforts using Sanger sequenced loci and phylogenomic analyses, but no prior analysis included a high fraction (276 of 290) of the percomorph families.

The UCE phylogeny has strong node support along the backbone of Percomorpha including Eupercaria, which is an inclusive clade containing Perciformes, Centrarchiformes, Labriformes, Acropomatiformes, and Acanthuriformes (Fig. 2, Supplementary Figs. 16–25). Previous phylogenetic analyses strongly support monophyly of Eupercaria but provide little resolution and node support for the interrelationships of its constituent lineages<sup>8,93,152</sup>. The only node in the UCE percomorph phylogeny shared among the delimited 13 taxonomic orders that is not supported with a bootstrap score of 100% is the resolution of Acropomatiformes and Acanthuriformes as a clade, which is supported with a bootstrap score of 99% (Supplementary Fig. 22).

***i. The deepest node in the phylogeny of percomorphs: the phylogenetic relationships of Ophidiiformes***

Ophidiiformes (cusk eels) is resolved as the sister lineage to all other percomorphs (Fig. 1). Relationships within this species-rich lineage of mostly marine fishes are not well known and the delimitation of taxonomic families is in flux<sup>167</sup>. The UCE phylogeny resolves two clades in Ophidiiformes that correspond to the suborders Bythitoidei and Ophidioidei (Fig. 1, Supplementary Fig. 3). Within Bythitoidei, the families Dinematchthyidae (pygmy brotulas) and Bythitidae (livebearing brotulas) are both monophyletic (Supplementary Fig. 3). As discovered in previous studies<sup>167-169</sup>, the formerly recognized taxonomic families Parabrotulidae and Aphyonidae are phylogenetically nested in Bythitidae (Supplementary Fig. 3). Historically, Ophidioidei contained Ophidiidae and Carapidae, but the UCE phylogeny (Fig. 1, Supplementary Fig. 3) as well as previous studies using whole mtDNA genome sequences and Sanger sequenced nuclear genes resolve Carapidae as phylogenetically nested within Ophidiidae<sup>89,93,152,170</sup>, prompting the synonymization of the family Carapidae with Ophidiidae<sup>149</sup>.

***ii. Phylogenetic relationships of Batrachoididae***

There is limited taxon sampling of Batrachoididae in the UCE phylogeny, but the subfamily Batrachoidinae (sampled with *Batrachoides pacifici* and *Opsanus tau*) is paraphyletic (Supplementary Fig. 3). Porichthyinae is paraphyletic in a phylogeny inferred from Sanger sequenced mitochondrial and nuclear genes<sup>89</sup>.

### **iii. Phylogeny of Gobiiformes**

One of the most surprising results from molecular analyses of percomorph phylogeny was the discovery that gobies, cardinalfishes (Apogonidae), and nurseryfishes (Kurtidae) resolve in a strongly supported monophyletic group<sup>7,171,172</sup>. Subsequent molecular studies resolved two competing hypotheses of relationships among the major lineages of Gobiiformes: 1) *Kurtus* and Apogonidae resolved as a clade, or 2) Apogonidae as the sister lineage of a clade containing *Trichonotus* (sand divers) and Gobiioidei<sup>3,93,152,172-176</sup>. The UCE phylogeny in this study resolves two major lineages in Gobiiformes: the Apogonoidei that contains *Kurtus* and Apogonidae, and a clade containing *Trichonotus* and Gobiioidei (Fig. 1, Supplementary Figs. 3,4). The relationships of the eight taxonomic families classified in Gobiioidei are identical to phylogenies inferred using Sanger sequenced mtDNA and nuclear genes<sup>175,176</sup> (Fig. 1, Supplementary Fig. 4).

### **iv. Phylogenetic relationships of Scombriformes and Syngnathiformes**

Scombriformes (e.g., tunas, cutlassfishes and butterfishes) and Syngnathiformes (e.g., seahorses, flying gurnards and dragonets) are resolved as sister lineages in the UCE phylogeny (Fig. 1), a result that is consistent with other molecular phylogenetic analyses<sup>3,8,93</sup>. This particular result has the surprising implication that relative to all other percomorph teleosts, tunas and seahorses are closely related.

Tunas, barracudas, cutlassfishes and swordfishes were historically classified in Scombroidei. Early phylogenetic analyses of Sanger sequenced mtDNA and nuclear genes resolved species classified in the traditional delimitation of Scombroidei into two distantly related percomorph lineages<sup>177</sup>. Xiphiidae (swordfishes), Istiophoridae (billfishes) and Sphyraenidae (barracudas) were resolved in the clade Carangiformes along with flatfishes, jacks and archerfishes (Fig. 1)<sup>1</sup>. The remaining lineages of the historical Scombroidei— Scombridae (tunas), Gempylinae (snake mackerels), Trichiurinae (cutlassfishes) and *Pomatomus saltatrix* (Bluefish)—are resolved in the clade Scombriformes that also includes the stromatioids, e.g., Stromateidae (butterfishes) and Chiasmodontidae (swallowers)<sup>5</sup>. Other lineages in Scombriformes include the enigmatic *Icosteus aenigmaticus* (Ragfish) and *Amarsipus carlsbergi* (Bagless Glassfish), both of which are deep-branching, monotypic lineages that long evaded phylogenetic resolution among percomorphs (Fig. 1, Supplementary Fig. 5). The UCE phylogeny resolves *Lepidocybium flavobrunneum* (Escolar) as the sister lineage of a clade

containing Gempylidae and Trichiuridae (Fig. 1, Supplementary Fig. 6). *Lepidocybium flavobrunneum* is traditionally classified in Gempylidae, which is paraphyletic in the UCE phylogeny as the remaining gempylids are more closely related to species of Trichiuridae (Fig. 1, Supplementary Fig. 6). This relationship has previously been resolved in a phylogenetic analysis using morphological data<sup>92</sup>.

Syngnathiformes as consisting of seahorses and pipefishes, flying gurnards, goatfishes, and dragonets was first resolved as a clade in phylogenetic analyses of Sanger sequenced mtDNA and nuclear genes<sup>152,178</sup>. Prior to the application of molecular phylogenetics, Callionymidae (dragonets) and Draconettidae (draconettids) were classified as closely related to Gobiesocidae (clingfishes)<sup>179-182</sup>. As reflected in molecular phylogenies, Pietsch<sup>68</sup> proposed that Dactylopteridae (helmet gurnards) were closely related to other syngnathiform lineages, but they were classified by others with the sculpins, rockfishes and scorpionfishes in Scorpaeniformes. Mullidae (goatfishes) were long classified in the wastebasket taxon Perciformes<sup>150,180,183</sup> but thought to be closely related to Haemulidae (grunts) and Sparidae (porgies)<sup>184</sup>. The UCE phylogeny resolves two major lineages of Syngnathiformes: 1) a clade we delimit as Mulloidei that contains Pegasidae (seamoths), Dactylopteridae, Mullidae, Callionymidae, and Draconettidae and 2) a lineage we delimit as Syngnathoidei, consisting of Syngnathidae (pipefishes and seahorses), Solenostomidae (ghost pipefishes), Aulostomidae (trumpetfishes), Fistularidae (cornetfishes), Centriscidae (shrimpfishes) and Macroramphosidae (snipefishes) (Fig. 1, Supplementary Figs. 7–9).

#### ***v. Relationships among Blenniiformes, Synbranchiformes and Carangiformes***

The UCE phylogeny resolves a strongly supported monophyletic group where Blenniiformes (e.g., blennies, cichlids, livebearers, and mullets) is the sister lineage of a clade containing Synbranchiformes (e.g., swamp eels, gouramies, snakeheads, and leaffishes) and Carangiformes (e.g., flatfishes, jacks and pompanos, billfishes, and barracudas). The discovery of this clade is one of the many dramatic results from molecular phylogenetics of percomorphs<sup>93</sup>, as this large and inclusive group contains more than 7,300 species that are classified into 92 taxonomic families.



**vi. Blenniiformes: Phylogenetic relationships of Atherinoidei (Cyprinodontoidea, Belonoidea and Atherinoidea)**

The monophyly of Blenniiformes—originally named Ovalentaria—resulted from a phylogenetic analysis of Sanger sequenced nuclear genes<sup>154</sup>. In the UCE phylogeny, Blenniiformes is monophyletic and contains two major clades: Atherinoidei (formerly Atherinomorpha) and all other lineages of Blenniiformes. Atherinoidei contains three major lineages: 1) Belonoidea (formerly Beloniformes, which includes needlefishes, medakas, halfbeaks, and flying fishes), 2) Cyprinodontoidea (formerly Cyprinodontiformes, which includes killifishes, rivulines, pupfishes, and livebearers), and 3) Atherinoidea (formerly Atheriniformes, which includes silversides and rainbowfishes). Phylogenomic analysis of our UCE dataset results in a well-resolved phylogeny of Atherinoidei, where every node along the backbone of the atherinoid tree is supported with a 100% bootstrap score (Fig. 1, Supplementary Fig. 10). Morphological phylogenies resolve Atherinoidea as the sister lineage of a clade containing Belonoidea and Cyprinodontoidea<sup>120,185</sup>, but the UCE phylogeny resolves Atherinoidea and Belonoidea as sister lineages (Fig. 1, Supplementary Fig. 10).

Over the past 15 years, the number of taxonomic families recognized in Cyprinodontoidea (killifishes, rivulines, pupfishes, and livebearers) increased from 10 to 16<sup>159,164</sup>. The recognition of these six additional families resulted from phylogenetic analyses of Sanger sequenced mtDNA and nuclear genes that overturned the results of morphological studies<sup>186-188</sup> and demonstrated the non-monophyly of Cyprinodontidae (pupfishes) and Poeciliidae (livebearers). The UCE phylogeny (Fig. 1, Supplementary Fig. 10) is consistent with morphological phylogenetic analyses in the resolution of Rivulidae (New World rivulines), Aplocheilidae (Asian rivulines), and Nothobranchiidae (African rivulines) as a monophyletic group, as well as a clade containing Poeciliidae, Anablepidae (four-eyed fishes), *Valencia* (toothcarps), Procatopodidae (African lampeyes), Fundulidae (topminnows), Cyprinodontidae, *Profundulus* (Middle American killifishes), Goodeidae (goodeids), and *Cubanichthys* (Caribbean killifishes)<sup>189,190</sup>. Morphological and molecular phylogenetic studies show congruence on specific relationships within Cyprinodontoidea. For example, the morphological analysis by Costa<sup>190</sup> identified *Profundulus* and Goodeidae as a clade. This result is supported in the UCE phylogeny as well as studies from Sanger sequenced mtDNA and nuclear genes<sup>186-188</sup>. Among the notable differences between molecular and morphological phylogenies of cyprinodontoids is

the resolution of Cyprinodontidae and Fundulidae as sister lineages (Fig. 1, Supplementary Fig. 10).

Belonoidea is monophyletic in the UCE phylogeny, but despite limited taxon sampling the families Zenarchopteridae and Hemiramphidae are found to be paraphyletic (Fig. 1, Supplementary Fig. 10). Five families of Belonoidea are recognized in Eschmeyer's Catalog of Fishes<sup>159</sup>. Phylogenies resulting from analyses of morphological characters and Sanger sequenced mtDNA nest Scomberesocidae (sauries) well within Belonidae (needlefishes) and resolve Hemiramphidae (halfbeaks) as paraphyletic relative to Exocoetidae (flyingfishes)<sup>191,192</sup>. In the UCE phylogeny, the hemiramphid *Oxyporhamphus micropterus* is more closely related to the sampled species of Exocoetidae than the other two sampled hemiramphids (Fig. 1, Supplementary Fig. 10), as previously inferred using morphological data<sup>193</sup>. The new phylogeny also resolves *Zenarchopterus dispar* as more closely related to the sampled belonid species *Xenentodon cancila* than to the other two sampled zenarchopterid species (Fig. 1, Supplementary Fig. 10).

There are 11 taxonomic families of Atherinoidea recognized in Eschmeyer's Catalog of Fishes<sup>159</sup>, but Notocheiridae is well nested in Atherinopsidae in phylogenetic analyses of Sanger sequenced mtDNA and nuclear genes<sup>194,195</sup>. Of the ten other families, eight are sampled in the UCE phylogeny. Missing from the analysis is the monotypic Dentatherinidae (Mercer's tusked silverside) and Telmatherinidae (Celebes rainbowfishes). The UCE phylogeny is consistent with current classifications and previous molecular and morphological phylogenetic analyses in resolving Atherinopsidae (New World silversides) as the sister lineage of all other atherinoids<sup>93,152,194,196</sup> (Fig. 1, Supplementary Fig. 10). Another area of agreement in the UCE phylogeny and previous molecular analyses is the resolution of a clade containing the monogeneric Atherionidae (pricklenose silversides) and Phallostethidae (priapiumfishes)<sup>195</sup> (Fig. 1, Supplementary Fig. 10).

There are differences in the recognition of taxonomic families of Atherinoidea in Eschmeyer's Catalog of Fishes<sup>159</sup> and Nelson et al.<sup>151</sup> that involve lineages associated with Melanotaeniidae (rainbowfishes). Following Dyer and Chernoff<sup>196</sup>, Nelson et al.<sup>151</sup> treat Bedotiidae (Madagascar rainbowfishes), Pseudomugilidae (blue eyes), and Telmatherinidae as subfamilies of Melanotaeniidae. This delimitation of Melanotaeniidae is not supported in the UCE phylogeny as Bedotiidae is resolved as the sister lineage of Atherinidae (Old World

silversides) (Fig. 1, Supplementary Fig. 10). In previous analyses of Sanger sequenced mtDNA and nuclear genes, Melanotaeniidae is paraphyletic because the species *Cairnsichthys rhombosomoides* is resolved as the sister lineage of a clade containing all sampled species of Telmatherinidae and Pseudomugilidae<sup>194,195</sup>; however, in the UCE phylogeny Melanotaeniidae—sampled with *Cairnsichthys* and *Iriatherina wernerii*—is monophyletic with strong node support (Fig. 1, Supplementary Fig. 10). The non-monophyly of Melanotaeniidae in previous phylogenetic analyses is likely driven by limited phylogenetic informativeness of Sanger sequenced genes to resolve relationships among Atherinoidea, as evidenced by the low bootstrap and Bayesian posterior node support values associated with these phylogenies<sup>194,195</sup>.

**vii. Blenniiformes: Phylogenetic relationships of Cichlidae, Pholidichthys and Polycentridae**

Within Blenniiformes, the UCE phylogeny resolves a clade containing Cichlidae, *Pholidichthys* (engineer gobies) and Polycentridae (leaffishes) (Fig. 1, Supplementary Fig. 11). Before the advent of molecular phylogenetics, the morphology of the pharyngeal jaw apparatus was cited as evidence to group Cichlidae with Labridae (wrasses and parrotfishes), Embiotocidae (surfperches), and Pomacentridae (damsel-fishes) in a group named Labroidei<sup>197-200</sup>. Phylogenetic analyses of ten Sanger sequenced nuclear genes strongly resolved *Pholidichthys* (engineer gobies) and Cichlidae as sister lineages, but these analyses did not confidently identify a sister lineage of this clade within the Blenniiformes<sup>93,154</sup>. As recently delimited<sup>201</sup>, Polycentridae contains five species classified among four genera distributed in freshwater habitats in Africa and South America: *Afronandus sheljuzhkoii* (Africa), *Polycentropsis abbreviata* (Africa), *Polycentrus* (two species in South America), and *Monocirrhus polyacanthus* (South America). The resolution of the freshwater Polycentridae as the sister lineage of the clade containing *Pholidichthys*-Cichlidae provides insight into the origin of freshwater blenniiform lineages and the biogeographic relationships of freshwater fishes in South America and Africa<sup>202,203</sup>.

**viii. Blenniiformes: Relationships of Mugilidae, Ambassidae, Pseudochromidae, Congrogadidae and Pomacentridae**

The phylogenetic relationships of Mugilidae (mullet) have long vexed phylogenetic studies of acanthomorphs, leading Stiassny<sup>204</sup> to declare in a morphological phylogenetic study that “without mullets our lives would be a lot simpler.” Morphological analysis of branchial

musculature supported a hypothesis that Mugilidae and Atherinoidei (formerly Atherinomorpha) are sister lineages<sup>205</sup>, but analysis of pelvic girdle morphology supported an affinity with other percomorph lineages<sup>204</sup>. The heterogeneity of relationships inferred from these two different anatomical systems appears explained in the results of molecular phylogenetic analyses with Mugilidae, Atherinoidei, or other “higher” percomorph lineages sensu Johnson and Patterson<sup>156</sup> resolved in Blenniiformes. In Sanger sequencing efforts, the sister lineage of Mugilidae within Blenniiformes varies between Plesiopidae (longfins) and Embiotocidae (surfperches), always with weak node support<sup>93,153,154</sup>. However, analysis of the UCE dataset and phylogenomic inferences based on exon data<sup>8</sup> both resolve Mugilidae and Ambassidae as sister lineages with strong node support (Fig. 1, Supplementary Fig. 11).

In phylogenetic studies of Sanger sequenced mtDNA and nuclear genes, Pseudochromidae (dottybacks) is resolved as paraphyletic relative to Plesiopidae (roundheads) and Pomacentridae (damsel fishes)<sup>93,152</sup>. In the UCE phylogeny, Pseudochromidae is paraphyletic because Congrogadidae (eelblennies) is resolved as the sister lineage of a clade containing the remaining species of Pseudochromidae, Plesiopidae, Pomacentridae, Grammatidae (basslets), Opistognathidae (jawfishes), Gobiesocidae (clingfishes), and Blennioidei (blennies) (Fig. 1, Supplementary Fig. 11).

#### ***ix. Blenniiformes: Phylogenetic relationships of Grammatidae, Opistognathidae, Gobiesocidae and Blennioidei***

The UCE phylogeny is congruent with trees inferred using exon data and Sanger sequenced mtDNA and nuclear genes in resolving a clade containing Grammatidae, Opistognathidae, Gobiesocidae, and Blennioidei<sup>8,93,152</sup>, but differs in resolving Embiotocidae (surfperches) as the sister lineage of this clade (Fig. 1, Supplementary Fig. 11). Grammatidae and Opistognathidae are successive outgroups to a clade containing Gobiesocidae and Blennioidei (Fig. 1, Supplementary Fig. 11). In the UCE phylogeny, the relationships among the families of Blennioidei—Tripterygiidae (triplefin blennies), Dactyloscopidae (sand stargazers), Blenniidae (combtooth blennies), Clinidae (kelp blennies), Labrisomidae (labrisomid blennies), and Chaenopsidae (tube blennies)—are nearly identical to those inferred from Sanger sequenced mtDNA and nuclear genes<sup>93,152</sup> (Fig. 1, Supplementary Fig. 11). However, a study with the

largest sampling of blennioid species indicates that Labrisomidae and Chaenopsidae are both paraphyletic<sup>206</sup>.

#### *x. Phylogenetic relationships of Synbranchiformes*

Previous analyses of Sanger sequenced genes and phylogenomic datasets consistently resolve Synbranchioidei (swamp eels, earthworm eels, armored sticklebacks, and freshwater spiny eels) and Anabantoidei (gouramies, snakeheads, and Asian leaffishes) as a clade<sup>8,93,152-154</sup>.

One of the many surprises to emerge from the molecular phylogenies of percomorphs was the resolution of *Indostomus* (armored sticklebacks) as nested within Synbranchioidei<sup>93,153,170,207,208</sup>. Traditionally, *Indostomus* was classified with seahorses, shrimpfish, and sticklebacks in the polyphyletic Gasterosteiformes based on the presence of dermal bony plates along the side of the body, a reduced cranial skeleton, and a small mouth size<sup>164</sup>. Analysis of developmental ontogeny of several morphological traits led to the conclusion that *Indostomus* is closely related to sticklebacks (Gasterosteidae)<sup>209</sup>. However, *Indostomus* and sticklebacks are distantly related in all molecular phylogenies and Gasterosteidae is classified here in Perciformes. Aside from the resolution of *Indostomus* as a synbranchoid, specifically as the sister lineage of Synbranchidae (swamp eels), the UCE phylogeny of Synbranchioidei is identical to relationships inferred from morphology where Synbranchidae is resolved as the sister lineage of a clade containing Chaudhuriidae (earthworm eels) and Mastacembelidae (freshwater spiny eels)<sup>210</sup> (Fig. 1, Supplementary Fig. 12).

Anabantoidei—delimited here as including Nandidae (Asian leaffishes), Badidae (chameleonfishes), Pristolepididae (Malayan leaffishes), Channidae (snakeheads), Helostomatidae (Kissing Gourami), Anabantidae (climbing gouramies), and Osphronemidae (gouramies and fighting fishes)—is monophyletic in the UCE phylogeny and characterized by the unique possession of teeth on the parasphenoid<sup>201,211:9-12</sup>. The UCE phylogeny resolves a clade containing Pristolepididae, Nandidae, and Badidae (Fig. 1, Supplementary Figs. 12,13), which is supported with a unique morphology of the ventral gill arch musculature where the *rectus ventralis IV* has an additional insertion on the ceratobranchial 5<sup>201,212</sup>. The clade containing Badidae and Nandidae is supported with two morphological traits: 1) a distally divided haemal spine on the second preural centrum and 2) the restriction of the attachments cells in eggs to the ventral side of the yolk sac<sup>201: Figs. 2d-f, 4</sup>. Previous classifications grouped

Pristolepididae and Badidae in Nandidae<sup>164</sup>. Given that the current delimitation of Nandidae and Pristolepididae each contain a single genus and Badidae includes two genera, future classifications can reduce monogeneric families and limit redundant taxonomic group names by classifying all these lineages in Nandidae.

The UCE phylogeny resolves Channidae, Helostomatidae, Anabantidae, and Osphronemidae as a strongly supported monophyletic group (Fig. 1, Supplementary Figs. 12,13). This phylogeny differs from those inferred using Sanger sequenced nuclear genes in resolving Helostomatidae as the sister lineage of a clade containing Anabantidae and Osphronemidae versus Helostomatidae as the sister lineage of Anabantidae or Osphronemidae<sup>93,201</sup>.

#### ***xi. Phylogenetic relationships of Carangiformes***

The UCE phylogeny is broadly congruent with other studies using UCEs<sup>1</sup>, but differs in the relationships of *Lates*, *Centropomus* (snooks), and *Sphyraena* (barracudas) (Fig. 1, Supplementary Fig. 14). Analyses of Sanger sequenced nuclear genes consistently supported the monophyly of Carangiformes<sup>93,152,213,214</sup>, but did not strongly support the relationships among the major carangiform clades. The UCE phylogeny includes a clade containing Centropomidae (sampled with *Lates* and *Centropomus*), *Lactarius lactarius* (False Trevally), and *Sphyraena*. Previous analyses using UCEs also resolved Centropomidae as monophyletic<sup>1</sup>, but placed *Sphyraena* as the sister lineage of all other Carangiformes. A phylogenetic analysis of Carangiformes based on a dataset that combines a smaller number of UCE loci with discretely coded morphological characters resolves Centropomidae as paraphyletic with *Lates* and *Psammoperca*, forming a clade that is sister to a lineage containing *Centropomus*, *Lactarius* and *Sphyraena*<sup>215</sup>.

The UCE phylogeny resolves three major lineages of Carangiformes: 1) an unnamed clade (discussed above) containing Centropomidae, *Lactarius*, and *Sphyraena*, 2) an unnamed clade containing Polynemidae (threadfins) and Pleuronectoidei (flatfishes), and 3) a clade delimited here as Carangoidei that contains *Leptobrama* (beachsalmons), *Toxotes* (archerfishes), *Nematistius pectoralis* (roosterfish), *Mene maculata* (moonfish), *Xiphias gladius* (swordfish), Istiophoridae (billfishes), and Carangoidea (Fig. 1, Supplementary Figs. 14,15).

As resolved in several analyses using Sanger sequenced loci and UCE-based phylogenomic analyses<sup>1,89,93,152,216</sup>, the traditional delimitation of Carangidae (jacks and pompanos) is paraphyletic. Carangidae, limited to the subfamilies Naucratinae and Caranginae, is the sister lineage of a clade containing the former carangid subfamilies Scomberoidinae and Trachinotinae, Echeneidae (remoras), *Rachycentron canadum* (cobia), and *Coryphaena* (dolphinfishes) (Fig. 1, Supplementary Fig. 15).

***xii. Eupercaria: relationships among Perciformes, Centrarchiformes, Labriformes, Acropomatiformes and Acanthuriformes***

Phylogenetic analyses of Sanger sequenced loci led to the resolution of Eupercaria, an inclusive clade that contains more than 37% of species and 53% of all taxonomic families in Percomorpha<sup>149</sup>. While earlier studies resolved a clade containing Perciformes, Centrarchiformes, Labriformes, Acropomatiformes, and Acanthuriformes, phylogenies inferred from Sanger sequenced genes provided little resolution for the relationships among the major lineages of Eupercaria<sup>93,152</sup>. Analysis of the UCE dataset results in a phylogeny where Eupercaria is resolved as a clade with strong support for the relationships among the major lineages; Perciformes, Centrarchiformes, and Labriformes are found to be successive outgroups to a clade containing Acropomatiformes and Acanthuriformes. All of the nodes along the backbone of the eupercarian phylogeny are supported with bootstrap values of 100% except the clade containing Acropomatiformes and Acanthuriformes (BSS = 99%) (Fig. 2, Supplementary Fig. 22). The phylogenomic analyses of the UCE loci resolve this substantial issue of the teleost phylogeny, which was once identified as the new bush on the top of the percomorph phylogeny<sup>152</sup>.

***xiii. Phylogenetic relationships of Perciformes***

Prior to the application of molecular data to investigate the phylogenetic relationships of teleosts, the vast majority of percomorphs were classified in the catchall taxon Perciformes. In addition to perciforms, percomorphs included morphologically unique and disparate lineages such as Pleuronectiformes (flatfishes), Tetraodontiformes (pufferfishes), and Gasterosteiformes (sticklebacks and seahorses). Any lineage of percomorph that was not as morphologically distinctive as a flatfish or seahorse was classified in Perciformes. At the end of the 20th century Perciformes contained more than 10,000 species and 160 taxonomic families<sup>164</sup>. Phylogenetic

analyses of molecular datasets revealed that the perciform wastebasket contained lineages that spanned much of the backbone of the Percomorpha phylogeny. The UCE phylogeny offers a confirmation for the disassembly of Perciformes that involves the migration of more than 100 taxonomic families into nearly all other major lineages of Percomorpha.

An entirely different concept and delimitation of Perciformes emerged from molecular phylogenetic studies<sup>93,152,153,165,171,217-221</sup>. No longer a taxonomic wastebasket, Perciformes (as delimited here) contains more than 3,200 species that are classified among at least 53 taxonomic families and comprises a diverse array of lineages that not only were previously classified as perciforms, but also as scorpaeniforms and gasterosteiforms<sup>6,151</sup>. In addition to the namesake Percidae (perches, walleyes, and darters), the newer concept of Perciformes resulting from molecular phylogenetic analyses includes seabasses, scorpionfishes, rockfishes, sculpins, searobins, weaverfishes, notothenioids, eelpouts, sticklebacks, flatheads, and many others (Supplementary Table 3).

Molecular analyses consistently resolve the traditional delimitation of Serranidae (sea basses), which contains more than 60 genera and 450 species, as non-monophyletic in Perciformes<sup>93,165,221</sup>. In the UCE phylogeny, taxa comprising the traditional Serranidae resolve in four or five different lineages (Supplementary Fig. 16). Epinephelidae (groupers) and Anthiadidae (basslets and anthians) are resolved as successive sister lineages or as a monophyletic group that is the sister lineage of all other Perciformes. The less inclusive delimitation of Serranidae is strongly resolved as the sister lineage of Bembropidae (duckbills). *Acanthistius* is resolved as either the sister lineage of Anthiadidae, where it is traditionally classified, or as the sister lineage of all other perciforms except Epinephelidae and Anthiadidae. The enigmatic *Niphon spinosus*, which has long avoided a confident phylogenetic or taxonomic placement<sup>222,223</sup>, strongly resolves as the sister lineage of Percidae (Fig. 2, Supplementary Fig. 16).

In addition to the non-monophyly of the traditional Serranidae, the molecular phylogeny of Perciformes provides several strongly supported relationships that were not anticipated from inferences using morphological characters<sup>156,183,224</sup>. The UCE phylogeny is congruent with earlier analyses using Sanger sequenced loci but provides greater resolution and node support than obtained in earlier efforts. The commercially and scientifically important freshwater lineage Percidae is resolved in a clade that contains the marine *Niphon spinosus* and Trachinidae



(weaverfishes), a lineage we refer to as Percoidei (Fig. 2, Supplementary Fig. 16, Supplementary Table 3). Notothenioidei includes the well-known Antarctic adaptive radiation as well as *Percophis brasiliensis* (Brazilian Flathead), which is distributed in the Atlantic Ocean from the coast of southern Brazil to central Argentina<sup>225</sup>. Notothenioidei is strongly resolved as the sister lineage of a new delimitation of Scorpaenoidei that includes almost all the lineages traditionally classified in Scorpaeniformes such as Platycephalidae (flatheads), Scorpaenidae (scorpionfishes and rockfishes), Triglidae (searobins), Bembridae (deepwater flatheads), Platycephalidae (flatheads), Hoplichthyidae (ghost flatheads), Hexagrammidae (greenlings), Trichodontidae (sandfishes), Cyclopteridae (lumpfishes), Liparidae (snailfishes), and Cottidae (sculpins). In addition to these classic scorpaeniform lineages the new delimitation of Scorpaenoidei includes Zoarcoidea (eelpouts, ronquils, and wolffishes) and Gasterosteidea (sand eel, tubesnouts, and sticklebacks) (Fig. 2, Supplementary Figs. 17, 18).

The UCE phylogeny of Scorpaenoidei is quite different from trees inferred using a dataset of morphological characters and Sanger sequenced mtDNA and nuclear genes<sup>226</sup>. For example, Smith et al.<sup>226</sup> resolved Platycephalidae as the sister lineage of Triglidae, but the UCE phylogeny places Platycephalidae as the sister lineage of all other scorpaenoids (Fig. 2, Supplementary Fig. 17). In the UCE tree there are three major clades of Scorpaenoidei that contain multiple taxonomic families, but several families resolve along the backbone of the scorpaenoid phylogeny. Scorpaenoidea is here delimited as a strongly supported clade that includes *Normanichthys crockeri* (Mote Sculpin), Neosebastidae (gurnard scorpionfishes), Congiopodidae (horsefishes), Synanceiidae (stonefishes), and Scorpaenidae (Fig. 2, Supplementary Fig. 17). Bembridae, Triglidae, and Anoplopomatidae (sablefishes) resolve as successive sister lineages to a large clade containing all the lineages classified in Cottoidea (sculpins), Gasterosteidea, and Zoarcoidea (Fig. 2, Supplementary Figs. 18, 19, Supplementary Table 3).

Gasterosteidea and Zoarcoidea resolve as sister lineages with strong node support, which is a result supported in earlier phylogenetic analyses of Sanger sequenced mtDNA and nuclear genes<sup>93,152</sup>. Within Zoarcoidea the Bathymasteridae (ronquils) are resolved as the sister lineage of all other zoarcoids. In an earlier study using Sanger sequenced loci, Bathymasteridae was resolved as paraphyletic<sup>93</sup>, but the UCE phylogenetic analyses sample all three bathymasterid genera and strongly support the lineage as a monophyletic group (Supplementary

Fig. 18). *Scytalina cerdale* (Graveldiver) is nested well within Stichaeidae (Supplementary Fig. 18) while *Gymnoclinus cristulatus* (Trident Prickleback) is distantly related to other stichaeids (Supplementary Fig. 19), resolving as the sister lineage of Neozoarcidae. Previous phylogenetic analyses of morphology and Sanger sequenced mtDNA and nuclear genes resolve Stichaeidae as paraphyletic<sup>227-229</sup>. The zoarcoid lineages *Cryptacanthodes* (wrymouths), Lumpenidae (pricklebacks), *Zaprora silenus* (Prowfish), Opisthocentridae (ocellated blennies), *Ptilichthys goodei* (Quillfish), Pholidae (gunnels), *Gymnoclinus*, Neozoarcidae, Anarhichadidae (wolffishes), and Zoarcidae (eelpouts) resolve as a strongly supported clade that is the sister lineage of the paraphyletic Stichaeidae (Fig. 2, Supplementary Figs. 18,19).

### ***xiii. Phylogenetic relationships of Centrarchiformes***

Phylogenetic analyses of Sanger sequenced mtDNA and nuclear genes led to the discovery of Centrarchiformes, a clade of approximately 300 species classified in at least 16 taxonomic families<sup>93,152,214,230,231</sup>. Consistent with these earlier phylogenetic studies<sup>93,152,230,231</sup>, the UCE phylogeny resolves *Percalates* as the sister lineage of all other Centrarchiformes (Fig. 2, Supplementary Fig. 20). Terapontoidei includes Girellidae (nibblers), Scorpididae (halfmoons), *Dichistius*, Microcanthidae, *Oplegnathus* (knifejaws), Kyphosidae (sea chubs), *Kuhlia* (flagtails), and Terapontidae (grunters) (Supplementary Fig. 20). Centrachoidei is delimited here as a clade that includes *Enoplosus armatus* (Oldwife) and Percichthyidae (temperate perches), Centrachoidea which includes Centrarchidae (sunfishes, blackbasses, and pygmy sunfishes) and Siniperceidae (Chinese perches), and Cirrhitoidea which includes Cirrhitidae (hawkfishes), Latridae (trumpeters), *Chironemus* (kelpfishes), *Cheilodactylus*, and *Aplodactylus* (marblefishes) (Fig. 2, Supplementary Fig. 20, Supplementary Table 3).

The classification of Centrarchiformes is dynamic and unsettled, reflected in part by a high proportion of families that contain a single genus. Molecular phylogenies consistently resolve two sets of traditionally delimited centrarchiform families as non-monophyletic. First, the two species of *Percalates* were traditionally classified as Percichthyidae<sup>224</sup>, but resolve as the sister lineage of all other centrarchiforms<sup>93,149,152,214,230</sup>. There is no described taxonomic family to accommodate the classification of *Percalates*. Second, the classification of families within Cirrhitoidea was dramatically realigned as a result of molecular phylogenetic analyses. Traditionally, Cheilodactylidae (morwongs) contained three to five genera and approximately 20

species<sup>180,232</sup>. Previous phylogenetic analyses of mtDNA genes, morphological characters, and UCE data resolved Cheilodactylidae as polyphyletic, with all but two of the species traditionally classified as cheilodactylids nested within a paraphyletic Latridae<sup>233-235</sup>. The findings of these phylogenetic analyses resulted in a transfer of these species to Latridae from Cheilodactylidae. The new UCE phylogeny is consistent with these previous results, but differs from the phylogeny presented in Ludt et al.<sup>235</sup> in resolving *Aplodactylus* rather than *Chironemus* as the sister lineage of *Cheilodactylus* (Fig. 2, Supplementary Fig. 20).

#### ***xiv. Phylogenetic relationships of Labriformes***

The UCE phylogeny strongly resolves a clade we delimit as Labriformes which contains two major lineages: Uranoscoipoidei and Labroidei (Supplementary Fig. 21). As resolved in previous phylogenies inferred from Sanger sequenced nuclear genes<sup>176</sup>, Uranoscoipoidei contains Uranoscopidae (stargazers), Ammodytidae (sandlances), and Pinguipedidae (sandperches) as successive sister lineages to a clade containing the enigmatic *Cheimarrichthys fosteri* (Torrentfish) and Leptoscopidae (southern sandfishes) (Fig. 2, Supplementary Fig. 21). Morphological studies place *Cheimarrichthys* as closely related to Pinguipedidae or as the sister lineage of all “trachinoids,” which include all the lineages delimited here as Uranoscoipoidei<sup>236-238</sup>. The hypothesis that *Cheimarrichthys* and Pinguipedidae share common ancestry was rejected through the discovery that *Cheimarrichthys* shares more derived morphological character states with Leptoscopidae than any other “trachinoid” or uranoscopoid lineage<sup>239</sup>. Reflective of their shared common ancestry, *Cheimarrichthys* and Leptoscopidae have a similar geographic distribution; *Cheimarrichthys* is an anadromous species widely distributed among the rivers of New Zealand and leptoscopids are distributed along the Pacific and Indian coasts of Australia and New Zealand<sup>240,241</sup>.

Labroidei includes the sister lineages *Centrogenys vaigiensis* (False Scorpionfish) and Labridae (wrasses and parrotfishes) (Fig. 2, Supplementary Fig. 21). As discussed above regarding Blenniiformes, the species rich marine Labridae and the freshwater Cichlidae were hypothesized as closely related based on the morphology of the modified “labroid” pharyngeal jaw apparatus<sup>197-199</sup>, which is now known to have originated multiple times in Percomorpha<sup>154</sup>. Previous molecular phylogenetic analyses using Sanger sequenced nuclear genes demonstrated that labrids and cichlids are not closely related despite both having modified “labroid”

pharyngeal jaws, but these early molecular studies resulted in an ambiguous and poorly supported resolution of the species rich Labridae<sup>93,154</sup>. The resolution of Labridae and *Centrogenys vaigiensis* as sister lineages in the UCE phylogeny is interesting as both lineages have all three components of the modified labroid pharyngeal jaw apparatus<sup>154</sup>.

#### ***xv. Phylogenetic relationships of Acropomatiformes***

The discovery of Acropomatiformes resulted entirely from phylogenetic analyses of Sanger sequenced mtDNA and nuclear and genes<sup>93,176,214,225</sup> and was never intimated through the study of morphology<sup>183,224</sup>. The lineage is an odd assortment of deep sea and near shore percomorph lineages that were previously classified in the wastebasket version of Perciformes and the demonstrably polyphyletic Trachinoidei<sup>93,176,225</sup>. While molecular studies consistently resolve Acropomatiformes as a clade, its monophyly is not strongly supported with Bayesian posteriors or bootstrap values and relationships within the clade differ dramatically across studies<sup>93,176,214,225,242</sup>.

The UCE phylogeny resolves Acropomatiformes as monophyletic with 100% bootstrap support (Fig. 2, Supplementary Fig. 22). All but two nodes within Acropomatiformes are present in 100% of the bootstrap replicates. First, the clade containing *Bathyclupea* (deepsea herrings), *Champsodon* (gapers), Creediidae (sandburrowers), and Hemerocoetidae (signalfishes) is supported with a bootstrap score of 97%. Second, the clade containing *Scombrops* (gnomefishes), Symphysanodontidae (slopefishes), Epigonidae (deepwater cardinalfishes), and Howellidae (oceanic basslets) is supported with a 99% bootstrap score (Fig. 2, Supplementary Fig. 22). The relationships among acropomatiforms in the UCE tree are quite different from any previous study and include the non-monophyly of Polyprionidae (wreckfishes) as *Polyprion* is resolved as the sister lineage of a clade containing *Glaucosoma* (pearl perches), Pempheridae (sweepers), and *Lateolabrax* (Asian seaperches) while *Stereolepis* is the sister lineage of a clade containing *Banjos* (banjofishes) and Pentacerotidae (armorheads). The resolution of Howellidae and Epigonidae as sister lineages in the UCE phylogeny is interesting in the context of four osteological traits shared between these two lineages and the possibility of additional shared traits in Howellidae and other acropomatiform lineages<sup>243</sup>. Future phylogenetic studies will round out the sampling of Acropomatiformes by including *Dinolestes lewini* (Long-finned Pike),

Malakichthyidae (temperate ocean-basses), and Synagropidae (splitfin ocean-basses) to take advantage of the strong phylogenetic resolution provided by the UCE loci for this clade.

#### *xvi. Phylogenetic relationships of Acanthuriformes*

The first wave of molecular phylogenetic analyses of percomorphs was based on whole mitochondrial genomes and small sets of Sanger sequenced mitochondrial and nuclear genes. The major lineages of percomorphs and their composition began to emerge because of these molecular phylogenetic analyses. The monophyly of the major percomorph lineages and their relationships to one another are well resolved in the UCE phylogeny and we delimit these inclusive clades as taxonomic orders (e.g., Gobiiformes, Scombriformes, and Perciformes). Hampering these earliest molecular phylogenetic studies of percomorphs was a lack of phylogenetic resolution for relationships within and between major lineages of Eupercaria which include Perciformes, Centrarchiformes, Acropomatiformes, and what Smith et al.<sup>216</sup> delimit as Acanthuriformes. The lack of phylogenetic resolution was particularly acute in Acanthuriformes, a lineage that includes more than 2,320 species classified in 56 taxonomic families. The phylogenies resulting from earlier molecular studies resolved taxonomic families within Acanthuriformes as monophyletic with high bootstrap support [e.g., Chaetodontidae (butterflyfishes), Acanthuridae (surgeonfishes), and Sparidae (porgies)], but had very poor support for relationships among these lineages<sup>93,152,216</sup>.

Acanthuriformes is monophyletic in the UCE phylogeny with strong bootstrap node support; however, six nodes along the backbone of the acanthuriform phylogeny have bootstrap scores ranging from 70% to 94% (Fig. 2, Supplementary Figs. 22–24). Despite this lower support for a small portion of the acanthuriform phylogeny, the UCE tree provides insight into several issues not resolved in earlier molecular studies of percomorph phylogenetics. First, Gerreidae (morjarras), which long evaded phylogenetic resolution, is the sister lineage of all other Acanthuriformes (Fig. 2, Supplementary Fig. 22). Second, Moronidae (temperate basses) and Sillaginidae (whitings) are resolved here as sister lineages (Fig. 2, Supplementary Fig. 22). Though they were resolved as a closely related in earlier molecular studies<sup>93</sup>, Lutjanidae and Haemulidae are distantly related in the UCE phylogeny (Fig. 2, Supplementary Figs. 22,23). Finally, ten lineages identified as *incertae sedis* within Eupercaria by Betancur-R et al.<sup>149</sup> are

phylogenetically resolved with moderate to high bootstrap support in Acanthuriformes (Fig. 2, Supplementary Figs. 22–24).

One of the most surprising findings from molecular studies of the teleost phylogeny was the resolution of Lophioidei (anglerfishes, formerly Lophiiformes) and Tetraodontoidei (puffers and molas, formerly Tetraodontiformes) as sister lineages<sup>3,7,8,93,152,170,219</sup>. An analogous rearrangement within Mammalia in terms of divergence times might be recognition of a clade of marsupials as the sister lineage of primates. In morphology-based classifications, the lophioids were placed in Paracanthopterygii<sup>164,244</sup>, phylogenetically distant from other percomorph lineages. This migration of lophioids as paracanthopterygians into a derived clade of percomorphs is among the most significant changes in 21st century vertebrate phylogenetics. While the discovery that Lophioidei and Tetraodontoidei are closely related was based on phylogenetic analyses of molecular data, subsequent investigation of their morphology identified several soft tissue characters that are likely synapomorphies of a lophioid-tetraodontoid clade<sup>245</sup>. It has also been discovered that the larvae of these two lineages exhibit unique morphology and pigmentation<sup>246</sup>. Congruent with earlier studies, the UCE tree resolves an inclusive lineage containing *Siganus* (rabbitfishes), Scatophagidae (scats), Priacanthidae (bigeyes), Cepolidae (bandfishes), and Caproidae (boarfishes) as the sister lineage of the Lophioidei-Tetraodontoidei clade. These nodes in the UCE phylogeny are all characterized by high bootstrap support values (Fig. 2, Supplementary Figs. 24,25).

#### ***xvii. Acanthuriformes: phylogenetic relationships of Tetraodontoidei***

Some of the earliest phylogenetic analyses of ray-finned fishes focused on relationships within Tetraodontoidei, resulting in numerous phylogenetic analyses based on morphological and molecular datasets<sup>140,152,247-254</sup>. While there are important differences among nearly all the phylogenies of tetraodontoids, most analyses consistently resolve three to four sets of sister lineages that include Triacanthodidae (spikefishes)-Triacanthidae (triplespines), Diodontidae (porcupinefishes)-Tetraodontidae (puffers), Balistidae (triggerfishes)-Monacanthidae (filefishes), and Aracanidae (deepwater boxfishes)-Ostraciidae (boxfishes)<sup>93,140,152,247,254</sup>, but all these phylogenies differ in how these lineages relate to one another. They are also incongruent regarding the relationships of *Triodon macropterus* (Threetooth Puffer) and Molidae (molas and ocean sunfishes). The UCE phylogeny and most of the earlier molecular phylogenies do not

resolve the subclade formerly named Tetraodontoidei, which contained Triodontidae, Molidae, Diodontidae, and Tetraodontidae<sup>93,152,249-252</sup>. The monophyly of this group was inferred, in part, based on the beak-like teeth in the upper and lower jaws and on a non-protractile upper jaw<sup>140</sup>.

The relationships of Tetraodontoidei in the UCE phylogeny are strongly supported with high bootstrap values at every node (Fig. 2, Supplementary Fig. 24), but differ from all previous topologies inferred using morphology, molecules, or combined morphological and molecular datasets. The UCE phylogeny resolves the relationships of *Triodon* and Molidae and contains three major lineages: 1) a clade containing *Triodon*, Aracanidae, and Ostraciidae, 2) a clade containing Triacanthodidae, Triacanthidae, Balistidae, and Monacanthidae, and 3) a clade containing Molidae, Diodontidae, and Tetraodontidae (Fig. 2, Supplementary Fig. 24).

### ***xviii. Acanthuriformes: phylogenetic relationships of Lophioidei***

The UCE phylogeny includes 16 of 18 recognized taxonomic families of Lophioidei; the monotypic Centrophrynidae and Lophichthyidae are not sampled. Phylogenies of Lophioidei inferred from morphological characters, whole mtDNA genome sequences, and Sanger sequenced mtDNA and nuclear genes all differ from one another<sup>93,152,255,256</sup>. Congruent with all other phylogenetic analyses, the UCE phylogeny resolves the Lophiidae (goosefishes) as the sister lineage of all other Lophioidei (Fig. 2, Supplementary Fig. 25). It is also congruent with a previous phylogenetic analysis of lophioids in resolving Ogocephalidae (batfishes) as the sister lineage of a clade previously named Antennarioidei that contains Antennariidae (frogfishes), Tetrabrachiidae (tetrabranchid frogfishes), and Brachionichthyidae (handfishes)<sup>257</sup>. All nodes along the backbone of the UCE lophioid phylogeny have high bootstrap support (Fig. 2, Supplementary Fig. 25).

The UCE phylogeny is congruent with previous molecular phylogenetic analyses in resolving Chaunacidae (coffinfishes) as the sister lineage of the eleven taxonomic families that comprise the deepsea anglerfishes<sup>93,152,255</sup>, delimited here as Ceratioidea (Fig. 2, Supplementary Fig. 25, Supplementary Table 3). The UCE phylogeny and previous molecular analyses using whole mitochondrial genomes resolve Thaumathichthyidae (wolftrap anglers) as paraphyletic with *Lasiognathus* nested within Oneirodidae (dreamers)<sup>255</sup>. Within the ceratioids, the UCE phylogeny resolves *Neoceratias spinifer* (Toothed Seadevil), Linophrynidae (leftvents), and Ceratiidae (seadevils) as a monophyletic group (Fig. 2, Supplementary Fig. 25). These three

lineages all exhibit male obligate sexual parasitism and dramatically altered their immune systems through losing the capacity for somatic diversification of antigen receptor genes<sup>258</sup>. All previous morphological and molecular phylogenetic analyses of ceratioids resulted in the non-monophyly of the lineages exhibiting obligate male sexual parasitism, implying multiple origins of this unique reproductive mode<sup>255,258,259</sup>. In contrast, the UCE phylogeny implies a single evolutionary origin of this unique trait (Fig. 2, Supplementary Fig. 25).

#### *e. Divergence-time estimates*

For both the 702- and 1,084-taxon phylogenies, our relaxed-clock molecular dating analyses estimated similar stem lineage ages across the multiple subsamples of UCE loci, with overlapping 95% highest posterior densities for most nodes (Supplementary Table 4). There were also no observable differences in the median node heights reported in Maximum Clade Credibility trees built using post-burn-in trees that were randomly sampled (as in the tree represented in Figs. 1,2), or using post-burn-in trees that were systematically sampled after a certain number of MCMC iterations (Supplementary Table 4).

Our age estimates are largely in agreement with those presented in previous phylogenomic analyses of ~1,000 UCE loci<sup>3</sup> and ~1,100 exons<sup>8</sup> (Extended Data Fig. 3). For most major clades, we infer slightly older stem ages, but with 95% highest posterior density credible intervals that overlap with the dates reported in these previous studies (Extended Data Fig. 3). However, our analyses inferred comparably younger stem lineage ages for *Polymixia*, Percopsiformes, and clades within Eupercaria<sup>3,8</sup>. Our stem lineage age estimates are significantly older for Gobiiformes and the Syngnathiformes-Scobriformes clade<sup>3</sup>. Perhaps as a result of incongruent phylogenetic topologies, our analyses inferred younger stem age estimates for Acanthuriformes than estimated in the phylogenomic analysis of exon data<sup>8</sup>.

We similarly estimate crown lineage ages for major clades with 95% highest posterior densities that largely overlap with previous phylogenomic analyses<sup>3,8</sup>. Exceptions include the crown age estimates of Acanthuriformes, Syngnathiformes and Scobriformes, Trachichthyiformes, Beryciformes, Gobiiformes, Syngnathiformes and Blenniiformes. Many of the discrepancies in crown ages likely result from differences among inferred phylogenetic trees (especially within Eupercaria), or from the relatively sparse taxon sampling in previous phylogenomic studies<sup>3,8</sup>.



### *f. Diversification rate analyses*

Our results do not support a significant effect of the K-Pg on acanthomorph lineage diversification rates. TESS-CoMET results indicate constant tree-wide diversification rates through most of the history of Acanthomorpha, with no evidence of a mass extinction (Extended Data Fig. 5). Although Extended Data Fig. 5e suggest a brief increase in the global net-diversification (speciation minus extinction) rate at approximately 50 mya (followed by a decline), we observe very low Bayesian support for these rate shifts (Extended Data Fig. 5b,d). Parameter estimates for speciation and extinction rates converged in all TESS-CoMET runs (ESS values  $> 200$  and Geweke statistics within the 95% confidence intervals for all time points). Convergence results for the CoMET run visualized in Extended Data Fig. 5 are available in Supplementary Fig. 26. All replicate analyses produced diversification plots that were virtually indistinguishable from one another. The results of the Gelman-Rubin test, which calculates the ratio of within-sample variance to between-sample variance, ensured that rate parameters and shift time parameters converged across the independent, replicate analyses (Rubin-Gelman statistic  $< 1.05$ ) (Supplementary Fig. 27).

The CoMET results do report moderately supported shifts ( $2 \leq 2\ln \text{Bayes Factors} \leq 6$ ) in speciation and extinction rates in the last 10 million years (Extended Data Fig. 5a–e). We strongly suspect, however, that these shifts are an artefact of the CoMET model, perhaps due to how it accounts for incomplete taxon sampling. This suspicion is supported by diversification patterns reported in numerous other studies<sup>262-265</sup>, which all demonstrate (often dramatic) rate shifts close to the present-day. It remains unclear how these recent patterns may affect the inference of older rate shifts. May et al.<sup>266</sup> describe that more recent mass extinction events may cause a “shadow effect” that diminishes the signal of earlier mass extinctions. As it stands, we have no evidence that the rate shift we observe in the mid- to late-Neogene could be overshadowing or weakening a signal for an earlier shift in diversification rates.

Indeed, our tests of relative model fit in TESS corroborate CoMET’s estimate of constant diversification rates (Extended Data Fig. 6). Pairwise comparisons of marginal likelihoods using Bayes Factors suggested that a constant branching-process model best represents the pattern of diversification in Acanthomorpha. In general, this test of relative model fit strongly favored models assuming uniform sampling methods over diversified methods. Therefore, after

the model assuming a constant birth-death process and uniform sampling, the next most-favored branching process models were an episodic model that accounted for a rate shift 50 mya (in accordance with the blip in net-diversification rates from the CoMET analysis) and a model with speciation rates that decreased through time, both of which assumed uniform sampling. The predictive distributions of the gamma statistic, number of taxa, and lineage-through-time (LTT) plots for the three most-favored branching process models are reported in Supplementary Fig. 28. The models assuming a tree-wide rate shift at 50 my or a decreasing speciation rate produce posterior-predictive distributions that are in accordance with the empirical estimates from the time-calibrated acanthomorph phylogeny (Supplementary Fig. 28b,c,e,f,h,i). However, the distribution under a simpler, constant rate model is also in agreement and appears to produce the most similar LTT plots to the empirical data (Supplementary Fig. 28a,d,g).

There is controversy surrounding the popular macroevolutionary modeling program BAMM<sup>267,268</sup>, so indications of lineage diversification rate heterogeneity in the time-calibrated acanthomorph phylogeny are viewed with a degree of skepticism. Since the size of the phylogeny is so large, in every analysis BAMM estimated multiple shift configurations that were relatively equiprobable. We therefore chose not to examine configurations with the maximum a posteriori probability. Rather, for each analysis we chose to interrogate the maximum shift credibility (MSC) configuration, which considers only configurations sampled in the reversible-jump MCMC simulations and maximizes the product of the marginal branch-specific shift probabilities. In the 23 BAMM analyses that were conducted using the time-calibrated 1,084-taxon phylogeny, MSC configurations inferred anywhere between 22 and 33 well-supported rate shifts (Supplementary Fig. 29). The regression line in Supplementary Fig. 29, calculated using base R, demonstrates that the prior number of shifts specified in BAMM does not dramatically affect the estimated number of rate shifts (slope = 0.105) and only weakly predicts the posterior variation ( $y = 0.149x + 25.063$ ;  $R^2 = 0.217$ ). The average number of rate shifts among the MSC configurations was approximately 28. Bayes factor comparisons for each analysis, however, supported models with a number of diversification rate shifts in the upper 30s or low 40s, depending on the specified priors. This was true even for analyses with prior models that expected one rate shift in the phylogeny.

In Extended Data Fig. 7, we present the MSC configuration resulting from an analysis with a prior model that expected 15 rate shifts and ran a 2-chain MCMC simulation with a deltaT

value of 0.5. Log-likelihood values across all analyses were similar, but the analyses with prior models assuming 15 or 40 expected shifts displayed the highest effective sample sizes (ESS) for their log-likelihoods and for the number of shift events. Since the estimated number and positions of the rate shifts were similar across analyses with different priors, we take note of the 19 clades with leading branches that were estimated to have undergone rate shifts by at least 16 ( $\geq 70\%$ ) of the 23 BAMM analyses. The 19 shared clades, several of which (e.g. zoarcoids, darters, notothenioids, labrids, cichlids and gobies) have previously been described as having undergone radiations, are labeled with blue numbers in Extended Data Fig. 7. They include: 1) Dinematchthyidae, 2) Apogoninae (Apogonidae to the exclusion of *Pseudamia*), 3) Gobiidae and Oxudercidae, 4) Mastacembelidae, 5) the clade defined by Scopthalmidae and Soleidae, 6) Carangidae (to the exclusion of *Seriola*), 7) Pseudocrenilabrinae (in Cichlidae), 8) Poeciliidae, 9) Labridae, 10) Sciaenidae, 11) Chaetodontidae, 12) Acanthuridae (to the exclusion of *Naso*), 13) Anthiadae and Epinephelidae, 14.) darters (Etheostomatinae), 15) the clade defined by “Nototheniidae” and Channichthyidae (see Supplementary Fig. 17 for clarification), 16) *Sebastes*, 17) the clade defined by Trichodontidae and Psychrolutidae, 18) Lycodinae (in Zoarcidae), and 19) the clade defined by Stichaeidae and Zoarcidae. We chose to present the configuration in Extended Data Fig. 7 because the analysis assuming 40 rate shifts had more rate shifts beyond these 19 clades than the analysis assuming 15 expected rate shifts. Still, the MSC configuration presented in Extended Data Fig. 7 highlights eight additional rate shifts that are labelled with black numbers and are not present in this list of 19. Furthermore, while the MSC configuration in Extended Data Fig. 7 identifies rate shifts occurring within Acanthuridae and Zoarcidae, these shifts occur along a different-yet-nearby internal branch than in most of the other configurations. Specifically, the configuration in Extended Data Fig. 7 flags one rate shift in the branch leading to Acanthuridae to the exclusion of *Naso* and *Prionurus*, and another in the lineage defined by *Bothrocara* and *Lycodes concolor* (within Zoarcidae).

The fact that many of the rate shifts identified by BAMM occur along tipwards branches may indicate that the species richness of Acanthomorpha is driven by relatively recent, more phylogenetically or geographically localized radiations instead of a burst of diversification after the K-Pg. This pattern does not seem to be unique to acanthomorphs; numerous radiations have shown to have a similar pattern of constant diversification across the K-Pg boundary despite bursts in the origin of disparity in morphological and ecological traits<sup>269</sup>. Nevertheless, there is a

chance that this pattern is the by-product of analytical corrections for incomplete sampling. Such corrections may reduce the statistical power to infer shifts in diversification rates and increase the probability of Type II error when rate variation is present<sup>270</sup>. It is also known that Bayesian methods of diversification rate estimation, including BAMM and TESS, penalize parameter-rich diversification models and favor less-complex models even under liberal priors. Given the infinite number of possible diversification scenarios that could result in the observed phylogeny<sup>271</sup>, it is therefore possible that TESS estimated a constant-rate model to best fit our data because of its simplicity rather than its accuracy.

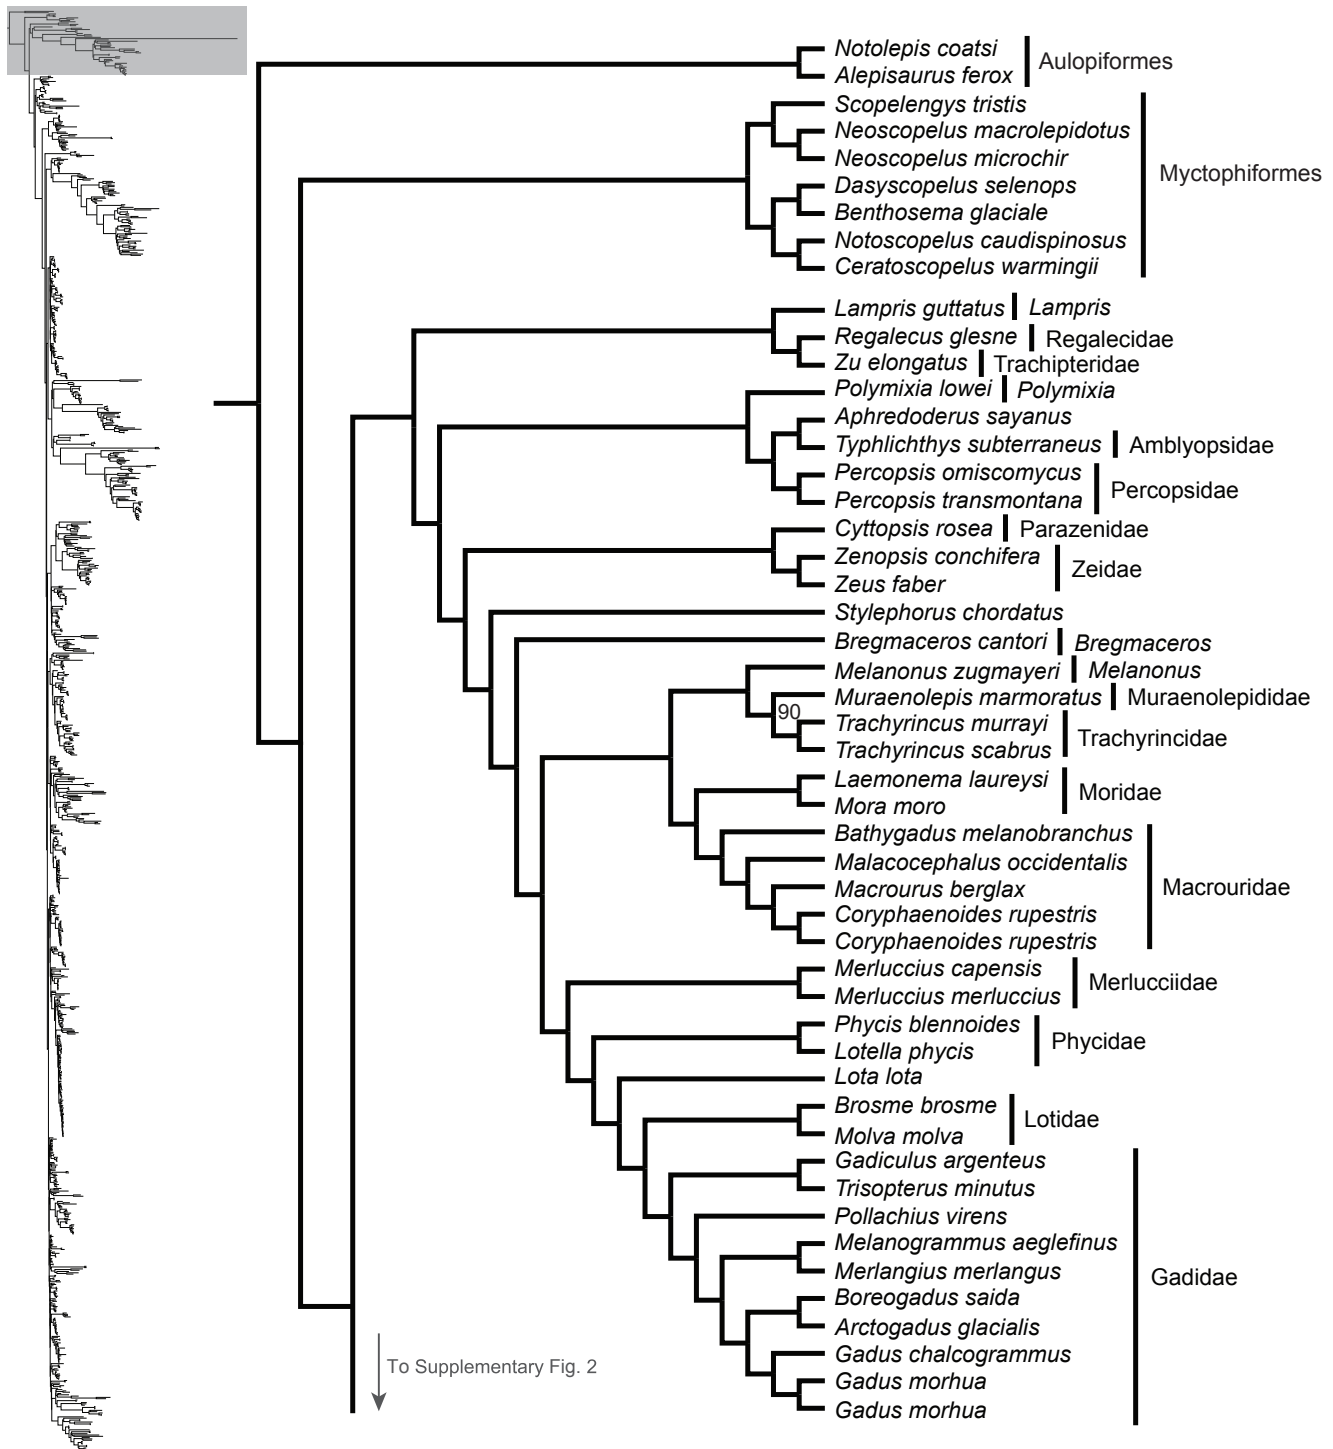

**Supplementary Fig. 1: Maximum likelihood phylogeny inferred in IQ-TREE.**

A guide tree on the left marks (with a gray rectangle), the region of the acanthomorph tree represented in the figure. Numbers at nodes reflect bootstrap support values. All nodes without a numerical annotation have 100% bootstrap support. Orders, families or genera for taxa are listed to the right of the vertical black bars. Any tips left unassigned to a higher taxon are monospecific or monogeneric taxa.

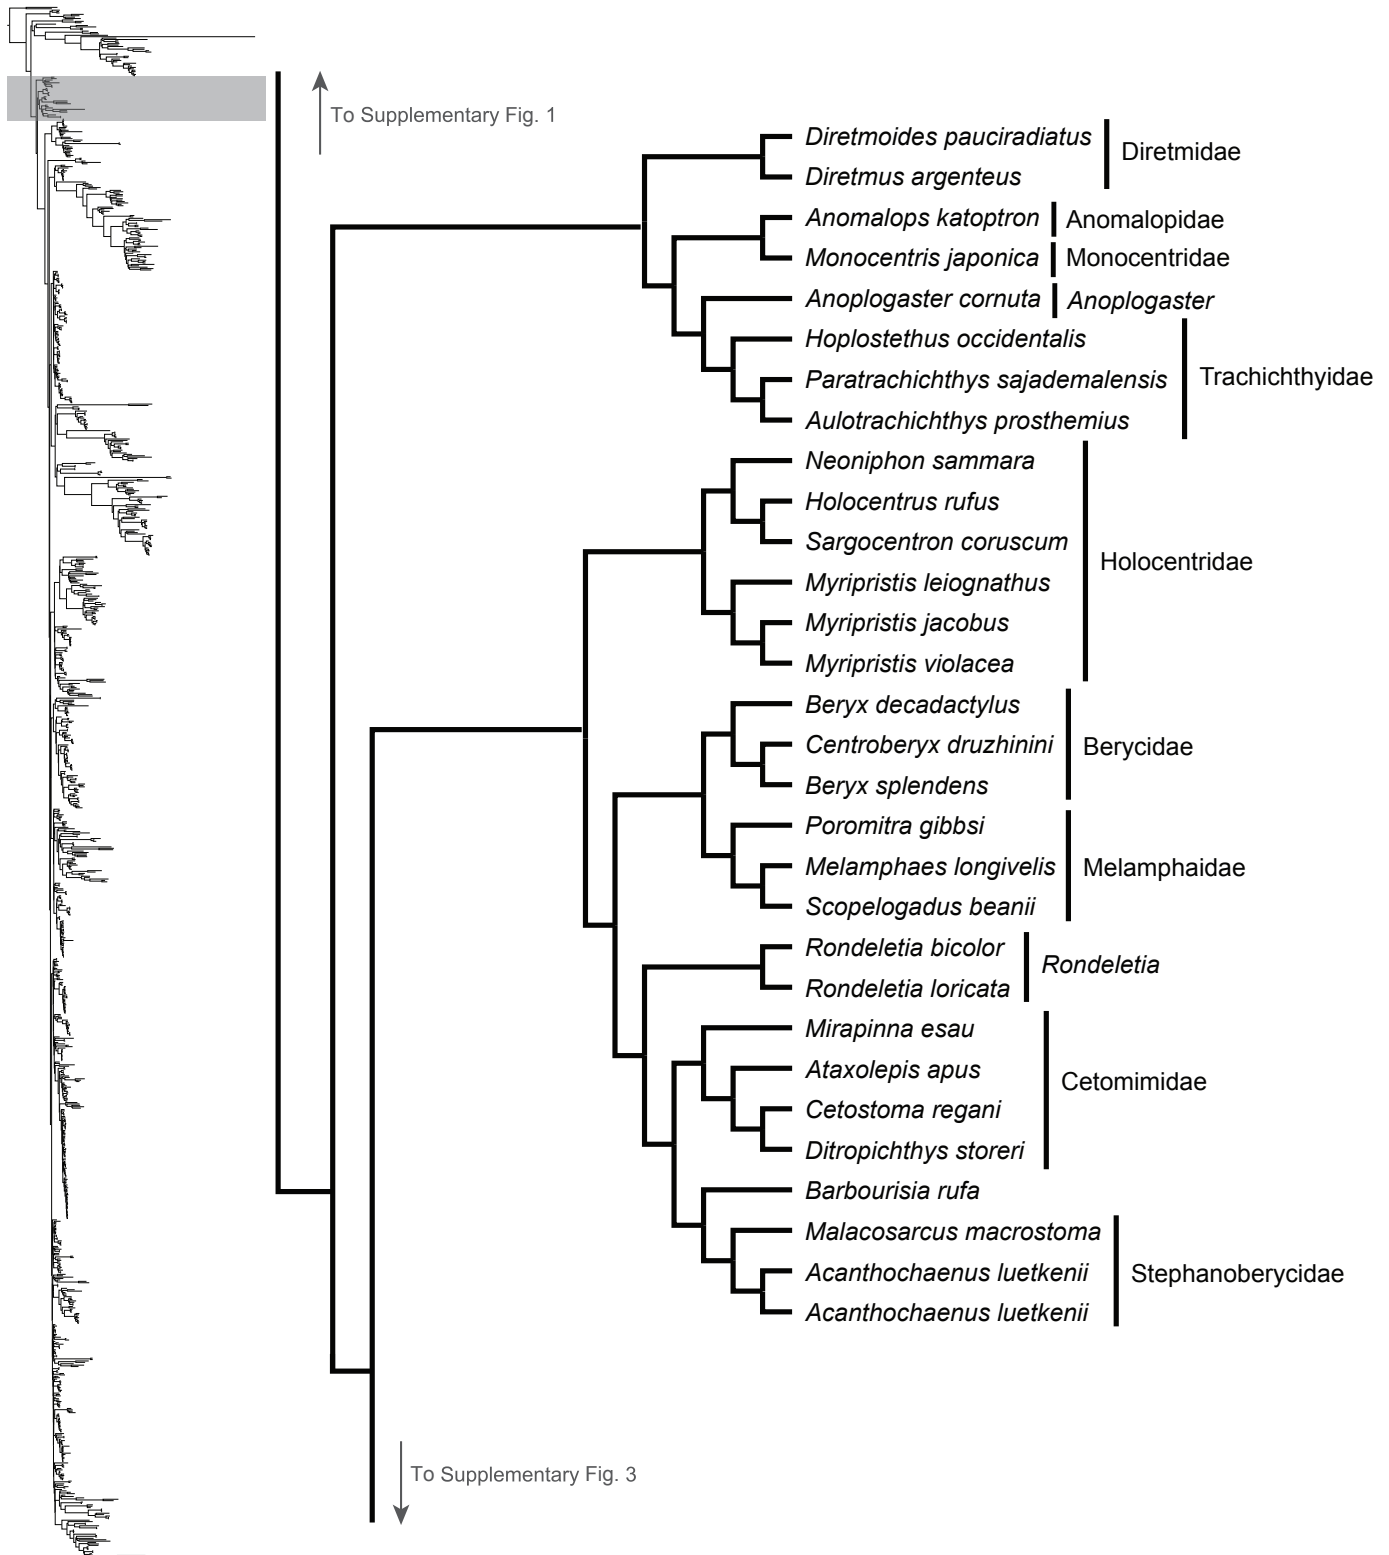

**Supplementary Fig. 2: Maximum likelihood phylogeny inferred in IQ-TREE.**

A guide tree on the left marks (with a gray rectangle), the region of the acanthomorph tree represented in the figure. All nodes have 100% bootstrap support. Orders, families or genera for taxa are listed to the right of the vertical black bars. Any tips left unassigned to a higher taxon are monospecific or monogeneric taxa.

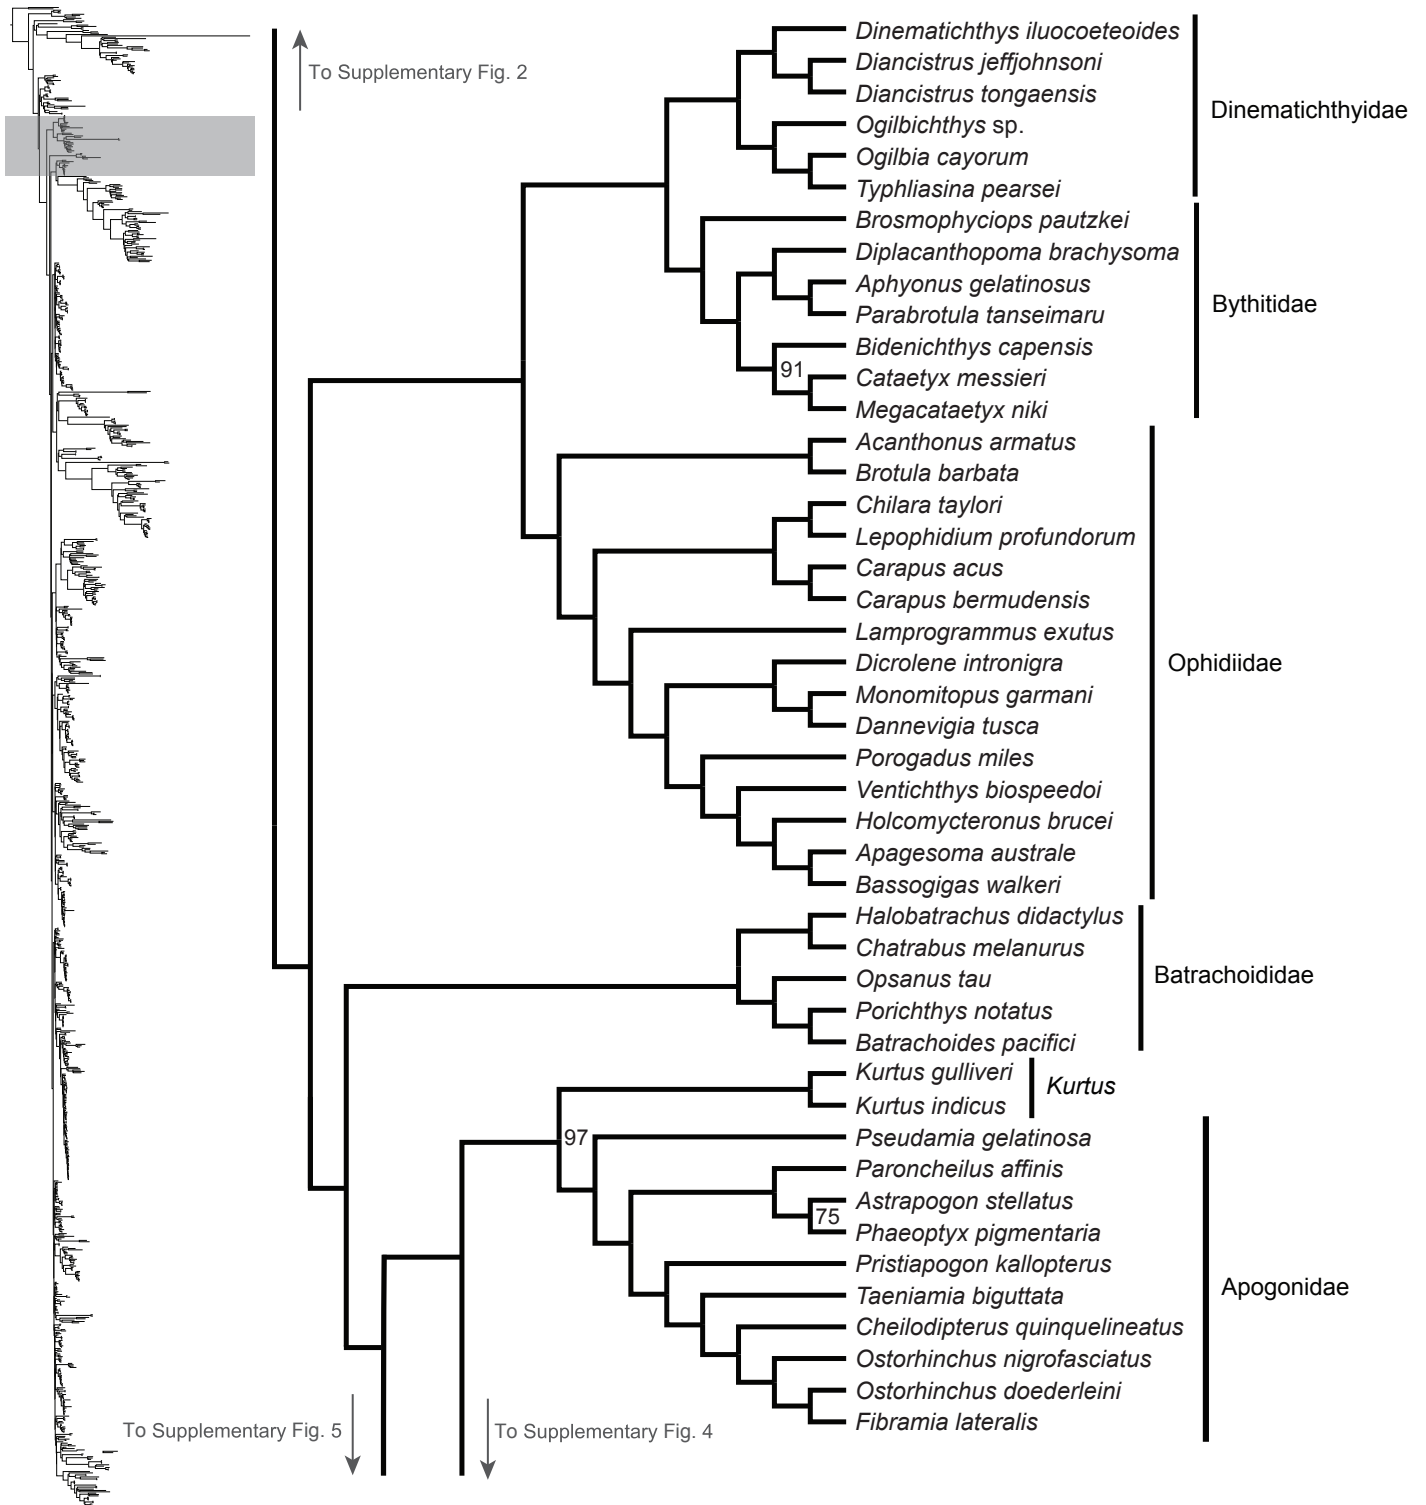

**Supplementary Fig. 3: Maximum likelihood phylogeny inferred in IQ-TREE.**

A guide tree on the left marks (with a gray rectangle), the region of the acanthomorph tree represented in the figure. Numbers at nodes reflect bootstrap support values. All nodes without a numerical annotation have 100% bootstrap support. Orders, families or genera for taxa are listed to the right of the vertical black bars.

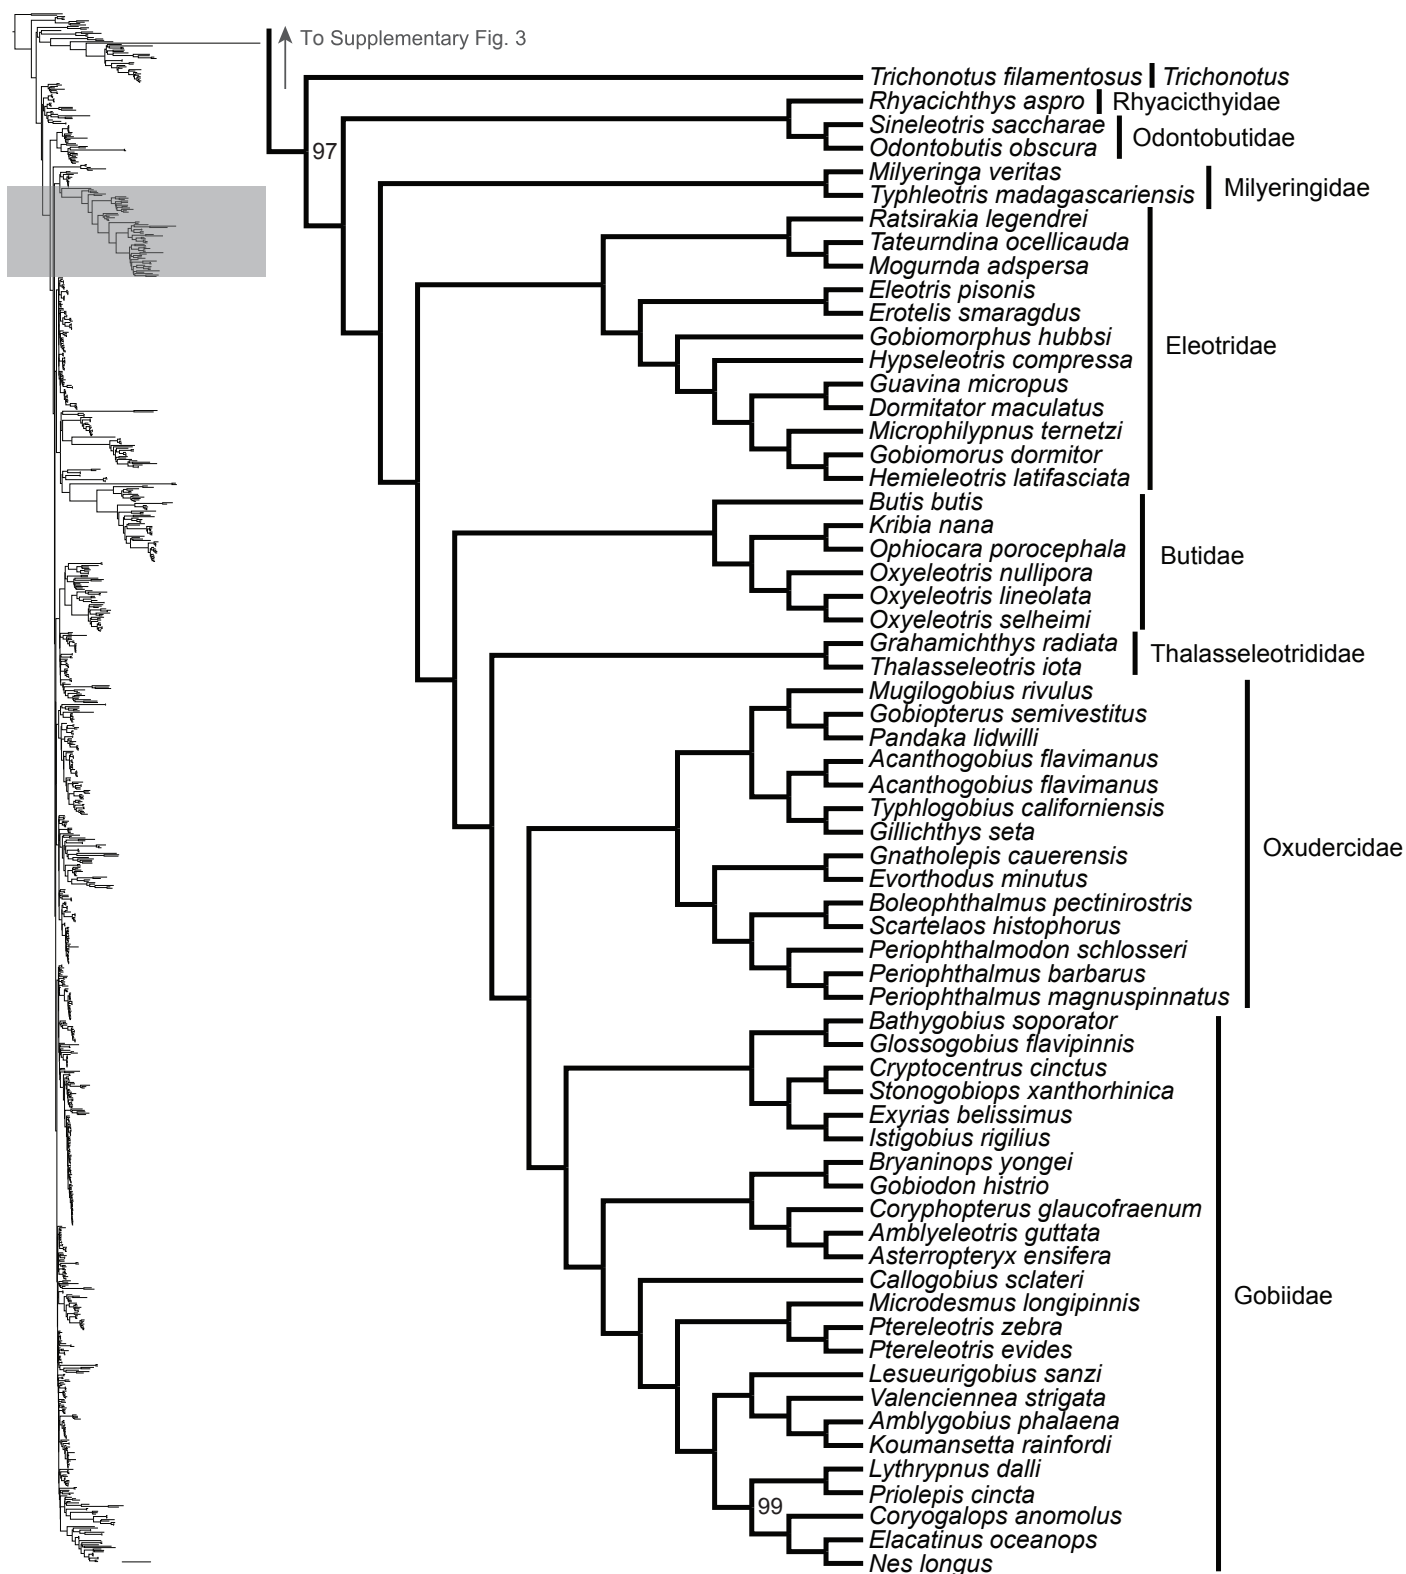

**Supplementary Fig. 4: Maximum likelihood phylogeny inferred in IQ-TREE.**

A guide tree on the left marks (with a gray rectangle), the region of the acanthomorph tree represented in the figure. Numbers at nodes reflect bootstrap support values. All nodes without a numerical annotation have 100% bootstrap support. Orders, families or genera for taxa are listed to the right of the vertical black bars.



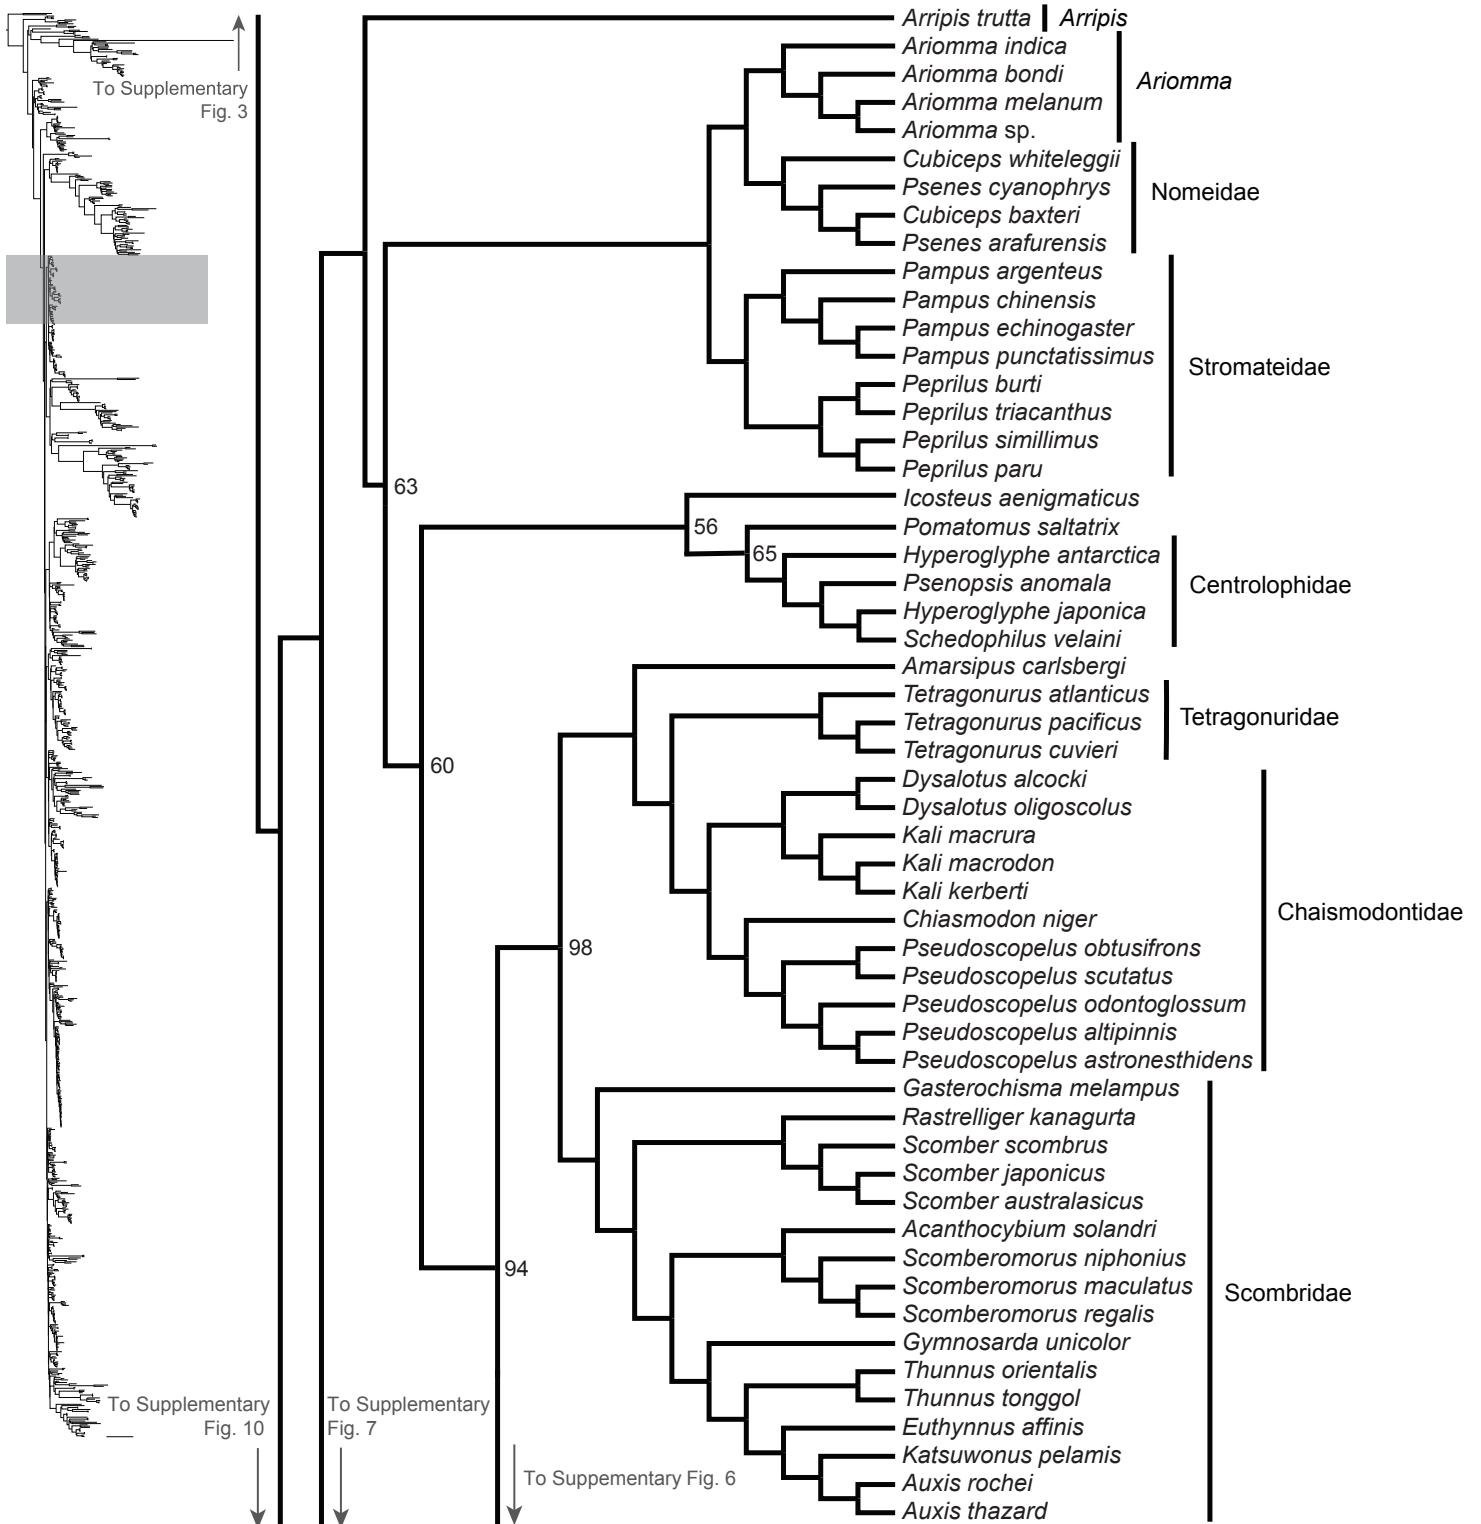

**Supplementary Fig. 5: Maximum likelihood phylogeny inferred in IQ-TREE.**

A guide tree on the left marks (with a gray rectangle), the region of the acanthomorph tree represented in the figure. Numbers at nodes reflect bootstrap support values. All nodes without a numerical annotation have 100% bootstrap support. Orders, families or genera for taxa are listed to the right of the vertical black bars. Any tips left unassigned to a higher taxon are monospecific or monogeneric taxa.

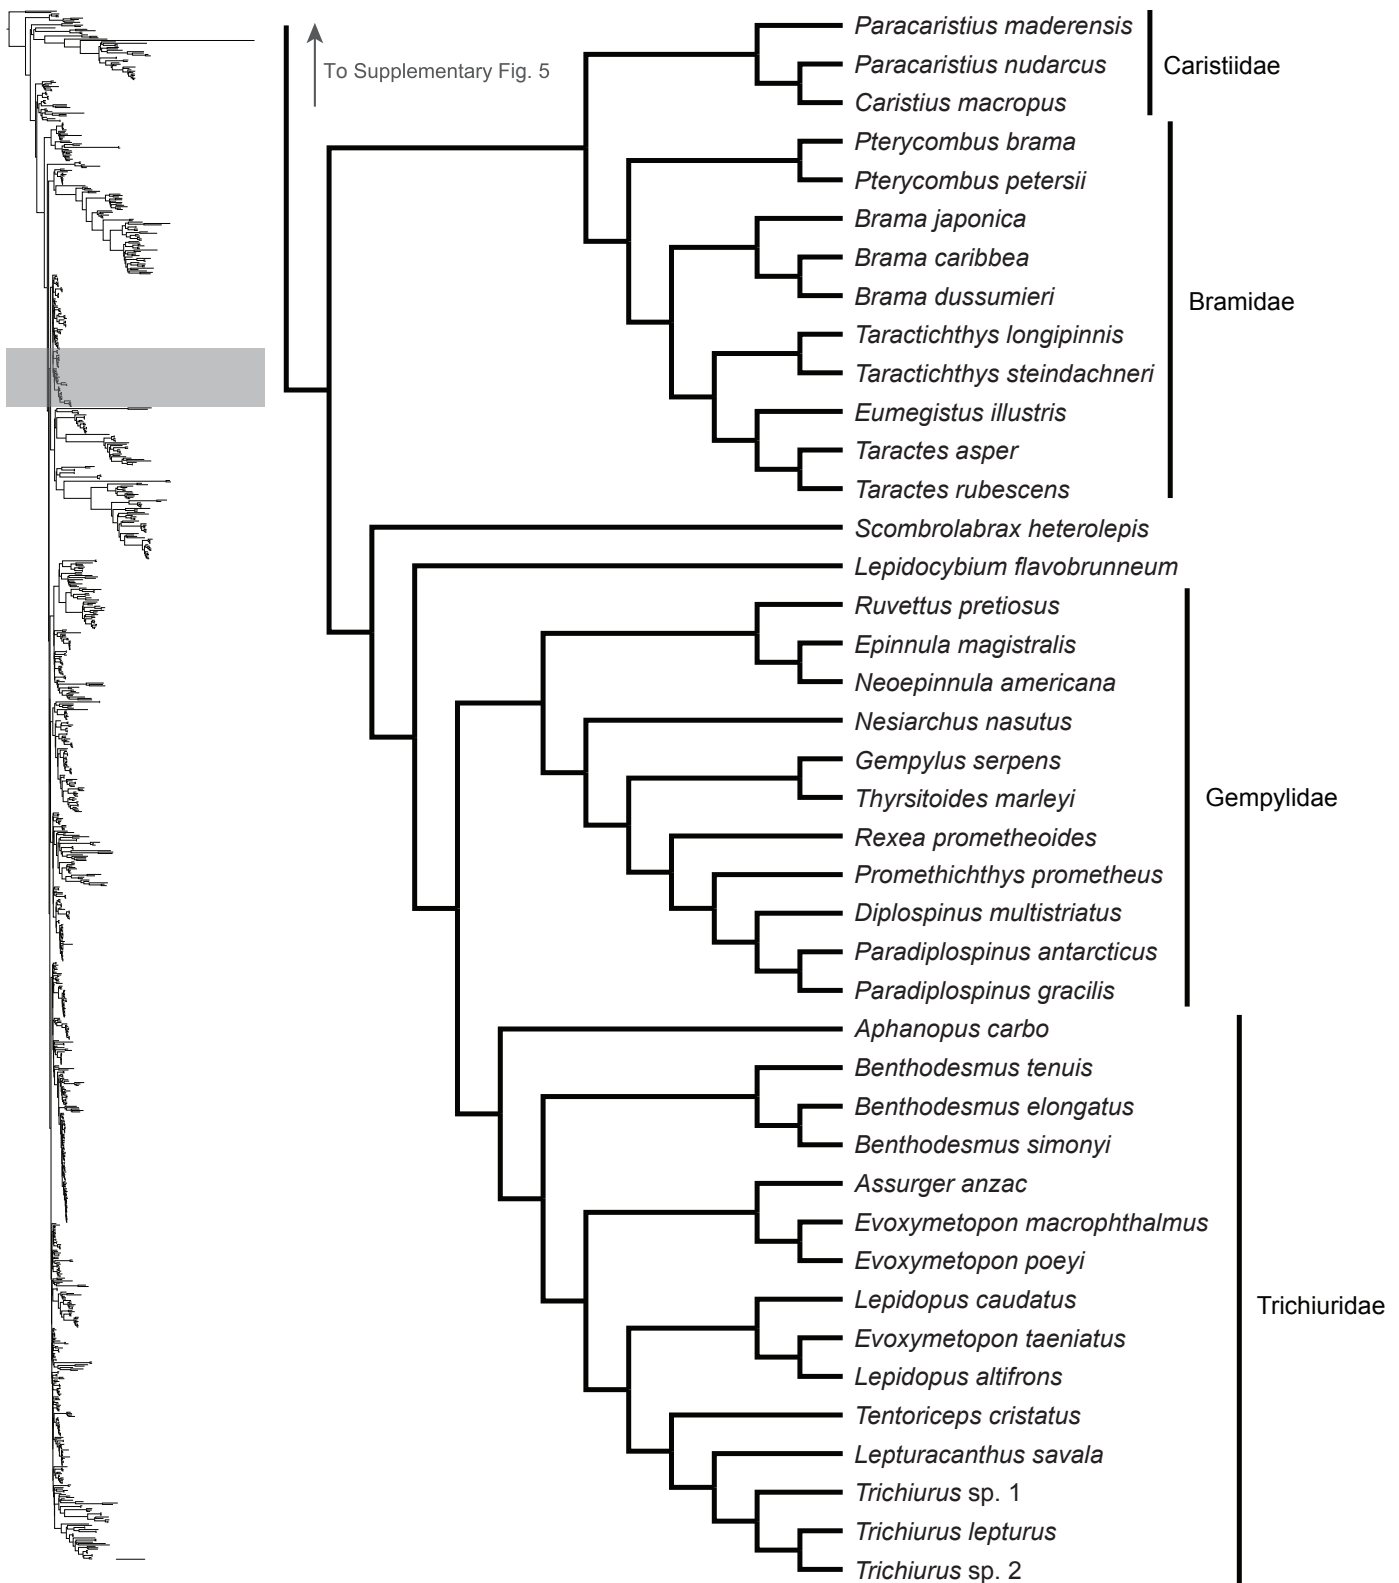

**Supplementary Fig. 6: Maximum likelihood phylogeny inferred in IQ-TREE.**

A guide tree on the left marks (with a gray rectangle), the region of the acanthomorph tree represented in the figure. All nodes have 100% bootstrap support. Orders, families or genera for taxa are listed to the right of the vertical black bars. Any tips left unassigned to a higher taxon are monospecific or monogeneric taxa.

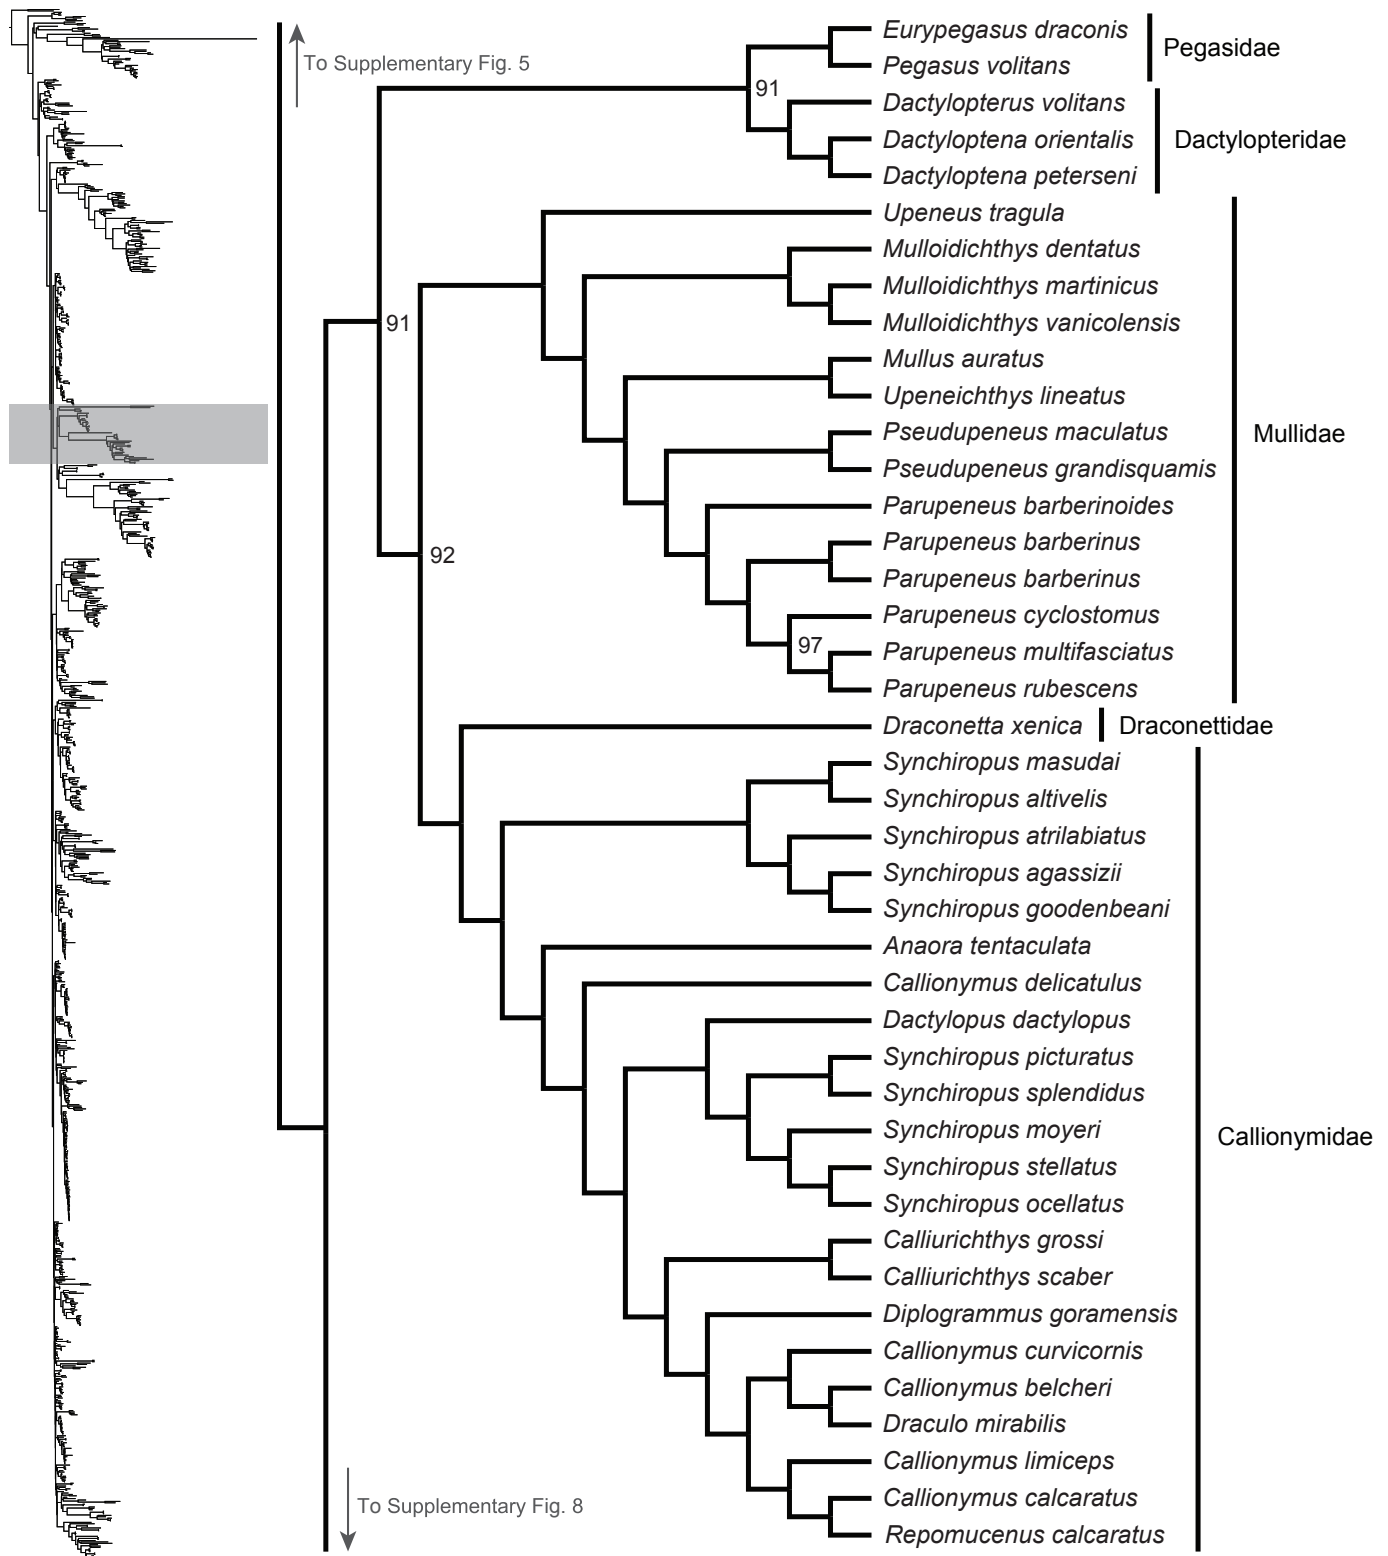

**Supplementary Fig. 7: Maximum likelihood phylogeny inferred in IQ-TREE.**

A guide tree on the left marks (with a gray rectangle), the region of the acanthomorph tree represented in the figure. Numbers at nodes reflect bootstrap support values. All nodes without a numerical annotation have 100% bootstrap support. Orders, families or genera for taxa are listed to the right of the vertical black bars.

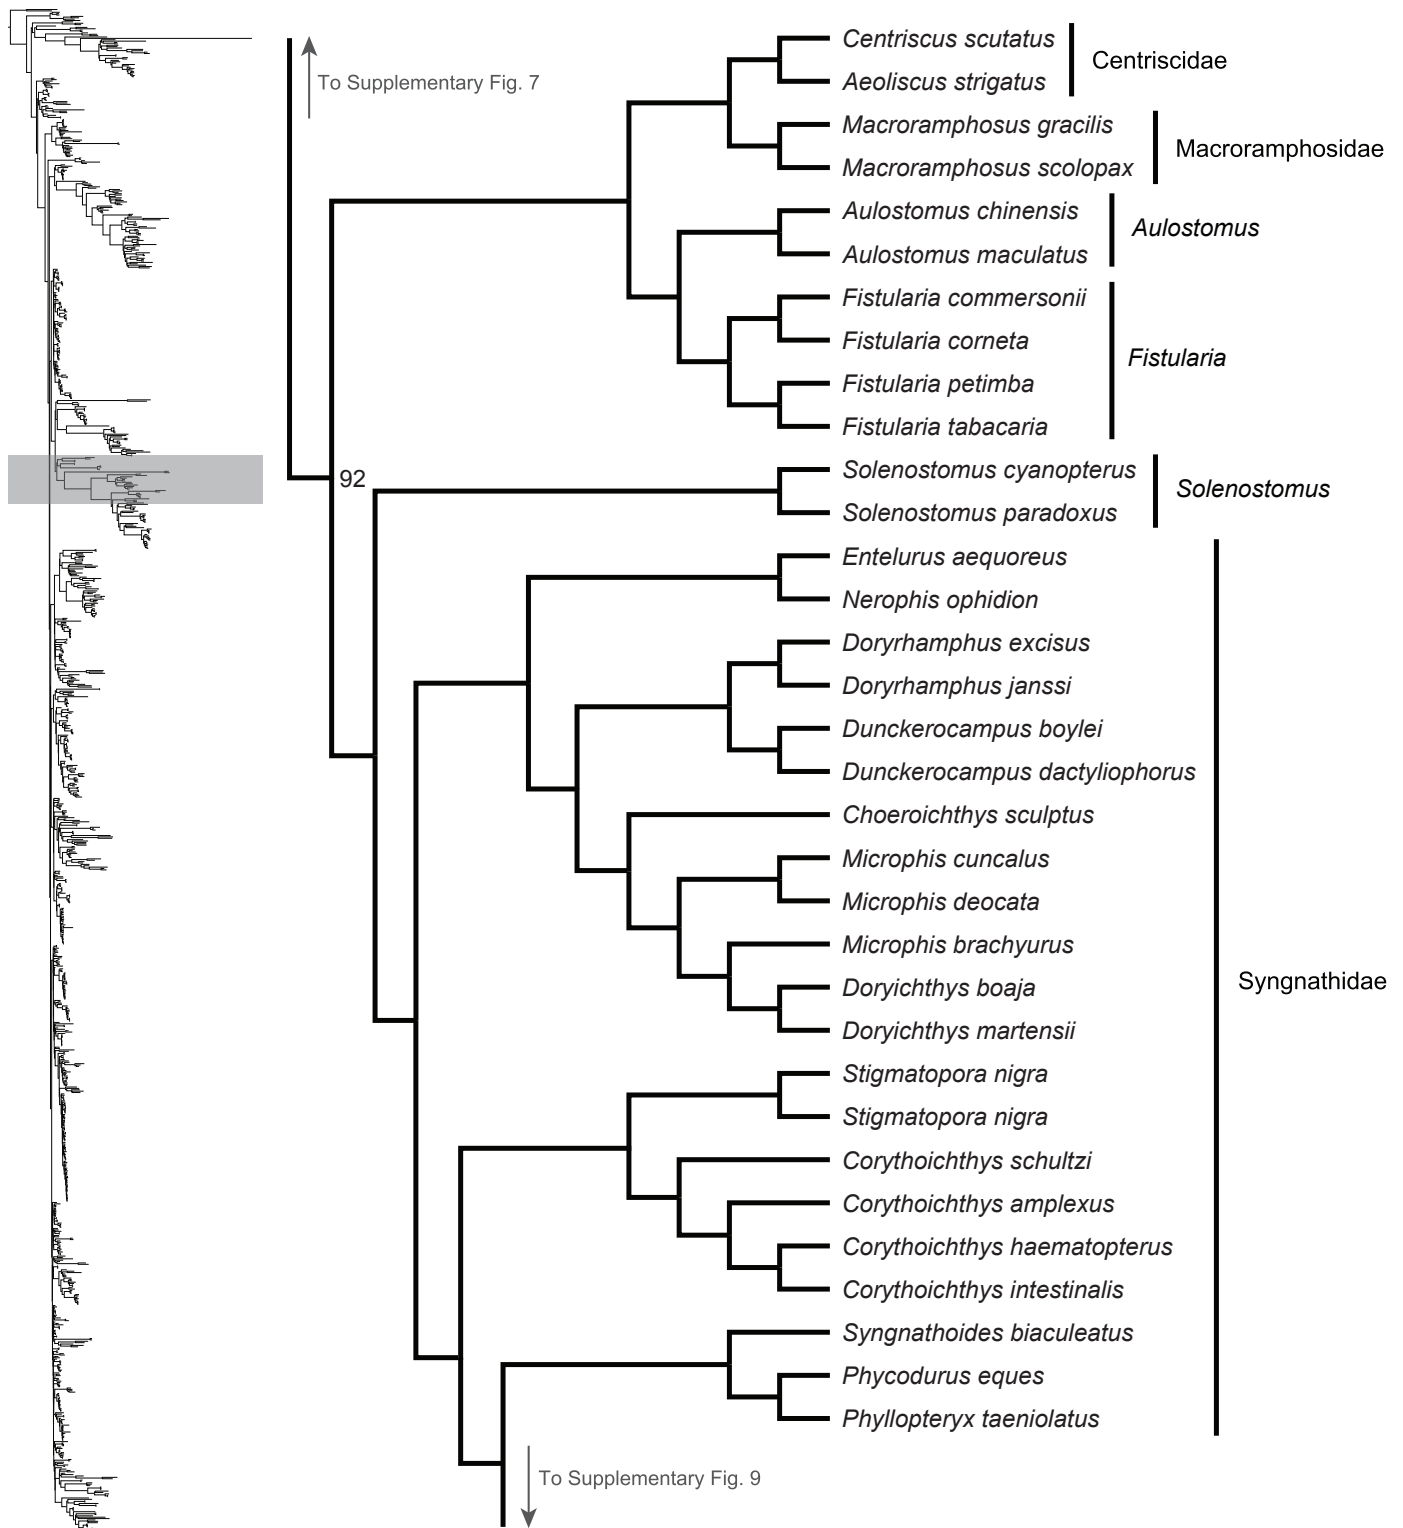

**Supplementary Fig. 8: Maximum likelihood phylogeny inferred in IQ-TREE.**

A guide tree on the left marks (with a gray rectangle), the region of the acanthomorph tree represented in the figure. Numbers at nodes reflect bootstrap support values. All nodes without a numerical annotation have 100% bootstrap support. Orders, families or genera for taxa are listed to the right of the vertical black bars.

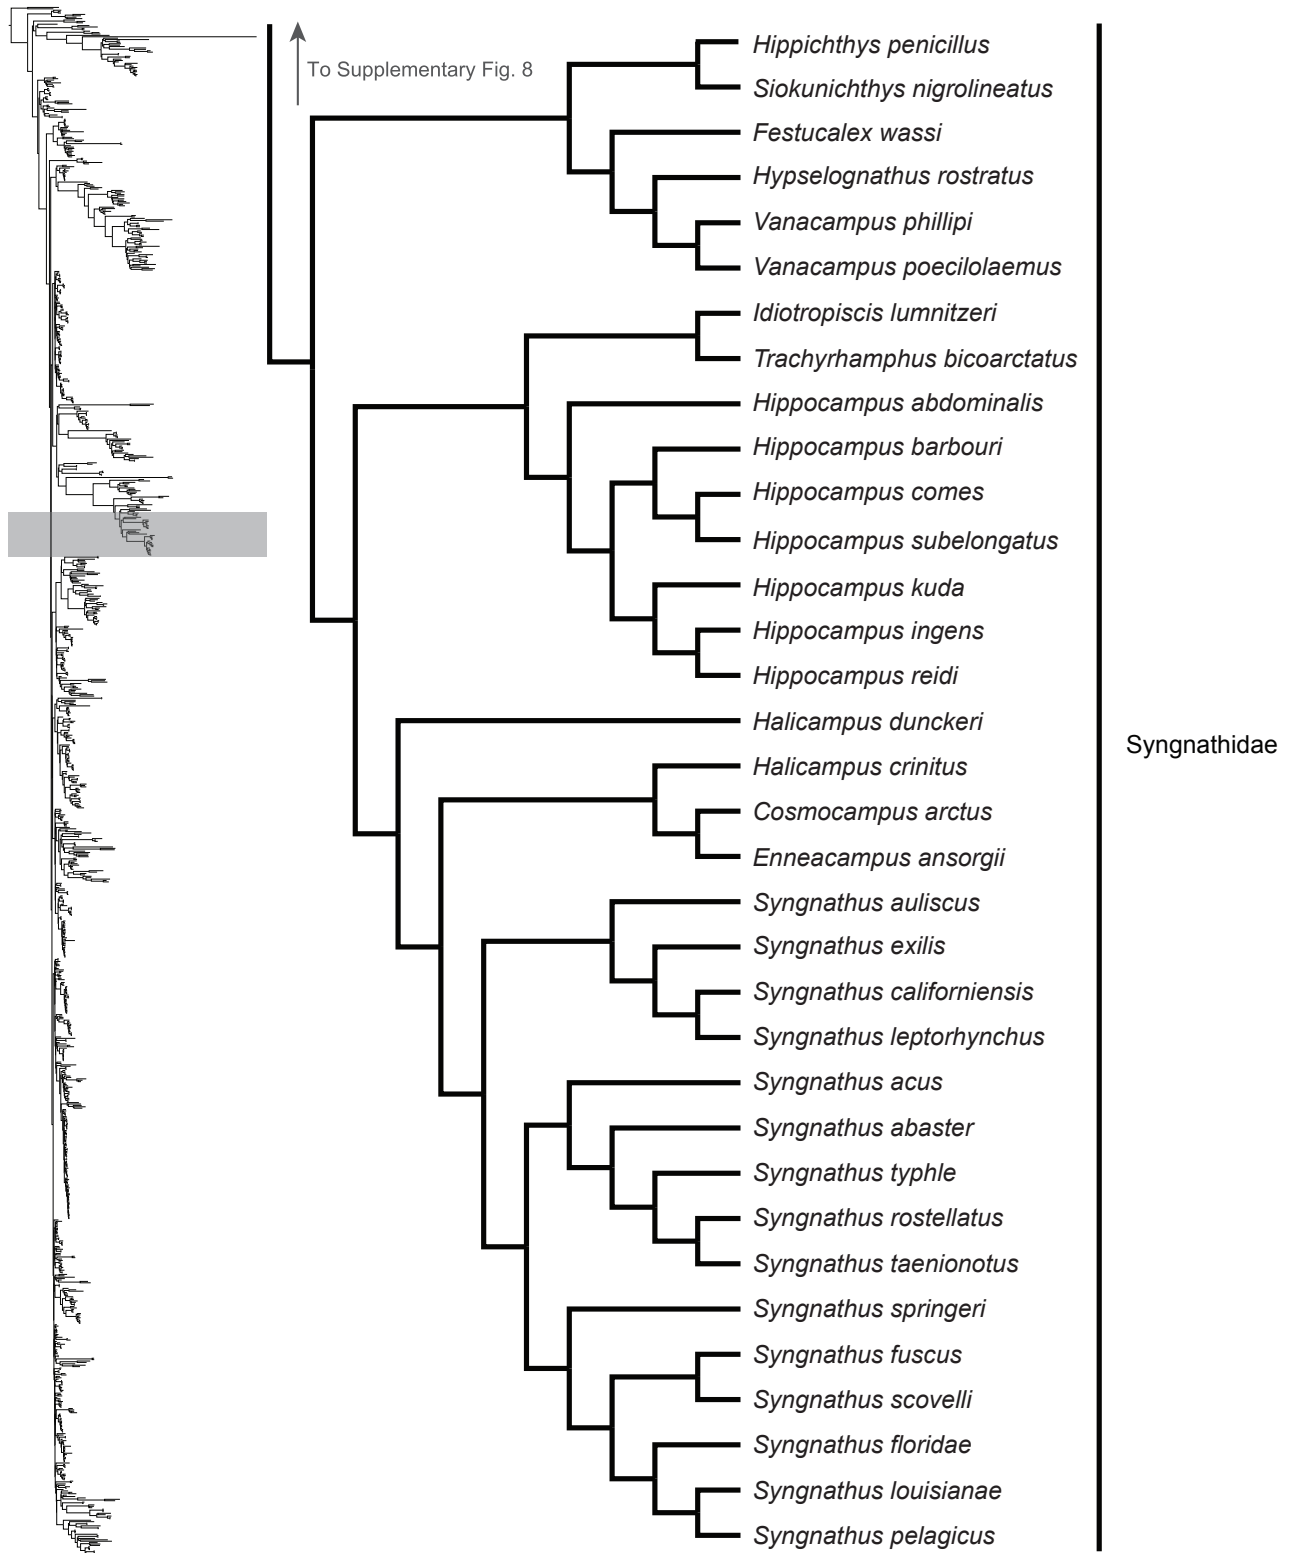

**Supplementary Fig. 9: Maximum likelihood phylogeny inferred in IQ-TREE.**

A guide tree on the left marks (with a gray rectangle), the region of the acanthomorph tree represented in the figure. All nodes have 100% bootstrap support. Orders, families or genera for taxa are listed to the right of the vertical black bars.

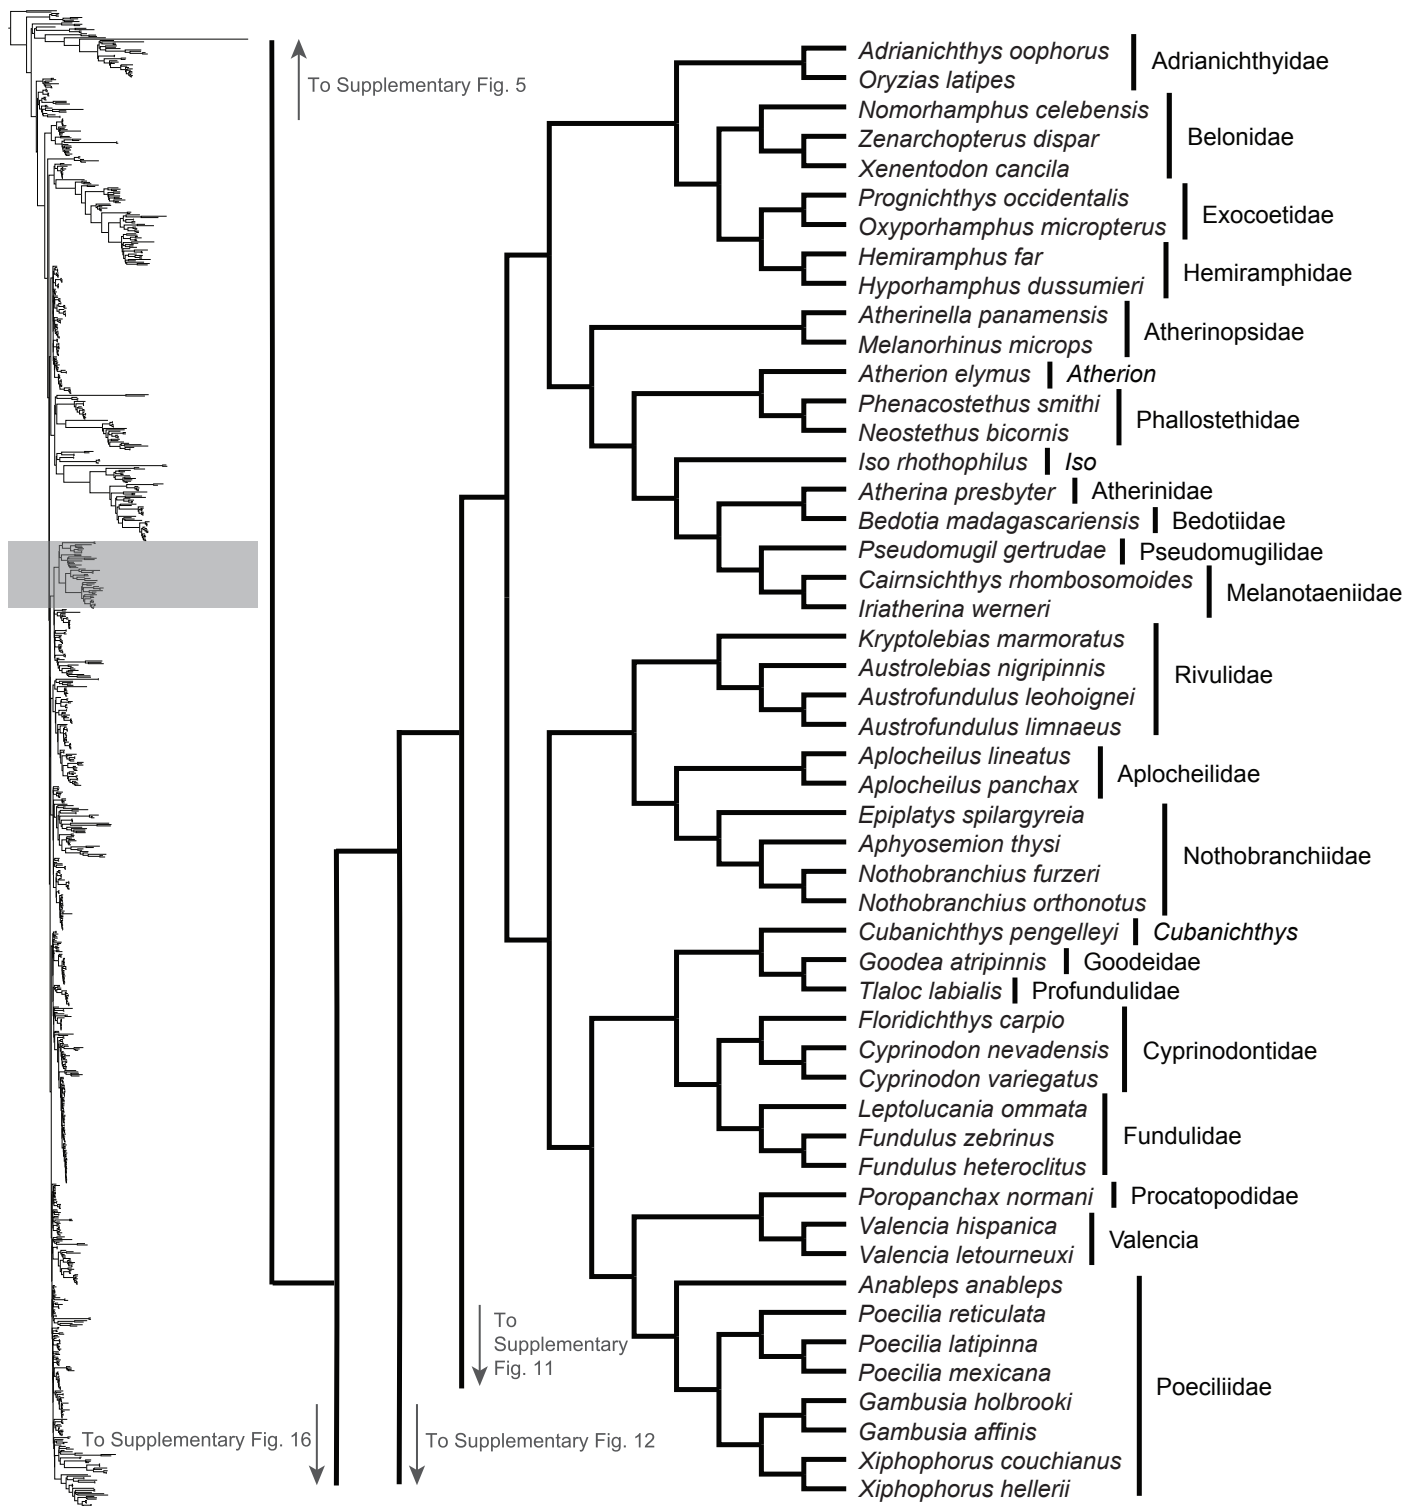

**Supplementary Fig. 10: Maximum likelihood phylogeny inferred in IQ-TREE.**

A guide tree on the left marks (with a gray rectangle), the region of the acanthomorph tree represented in the figure. All nodes have 100% bootstrap support. Orders, families or genera for taxa are listed to the right of the vertical black bars.

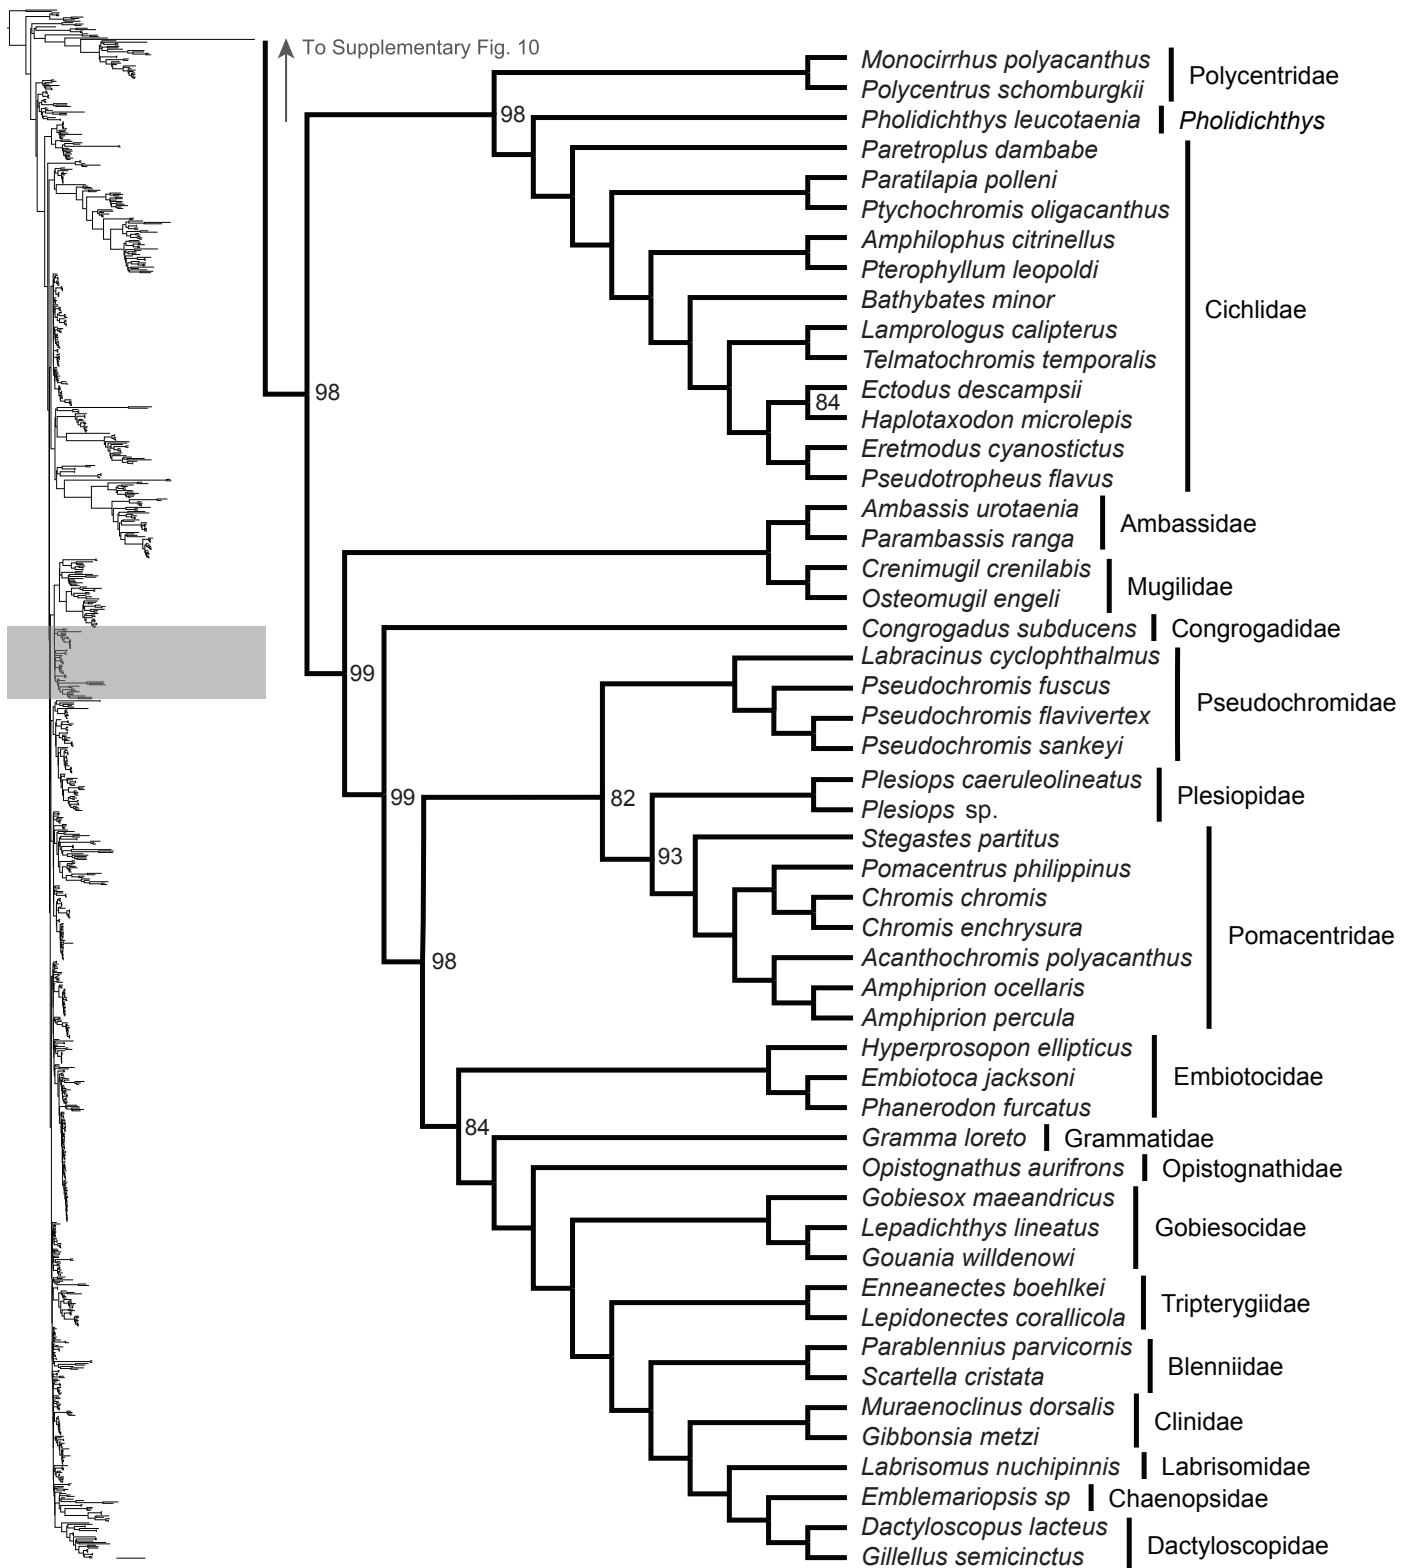

**Supplementary Fig. 11: Maximum likelihood phylogeny inferred in IQ-TREE.**

A guide tree on the left marks (with a gray rectangle), the region of the acanthomorph tree represented in the figure. Numbers at nodes reflect bootstrap support values. All nodes without a numerical annotation have 100% bootstrap support. Orders, families or genera for taxa are listed to the right of the vertical black bars.

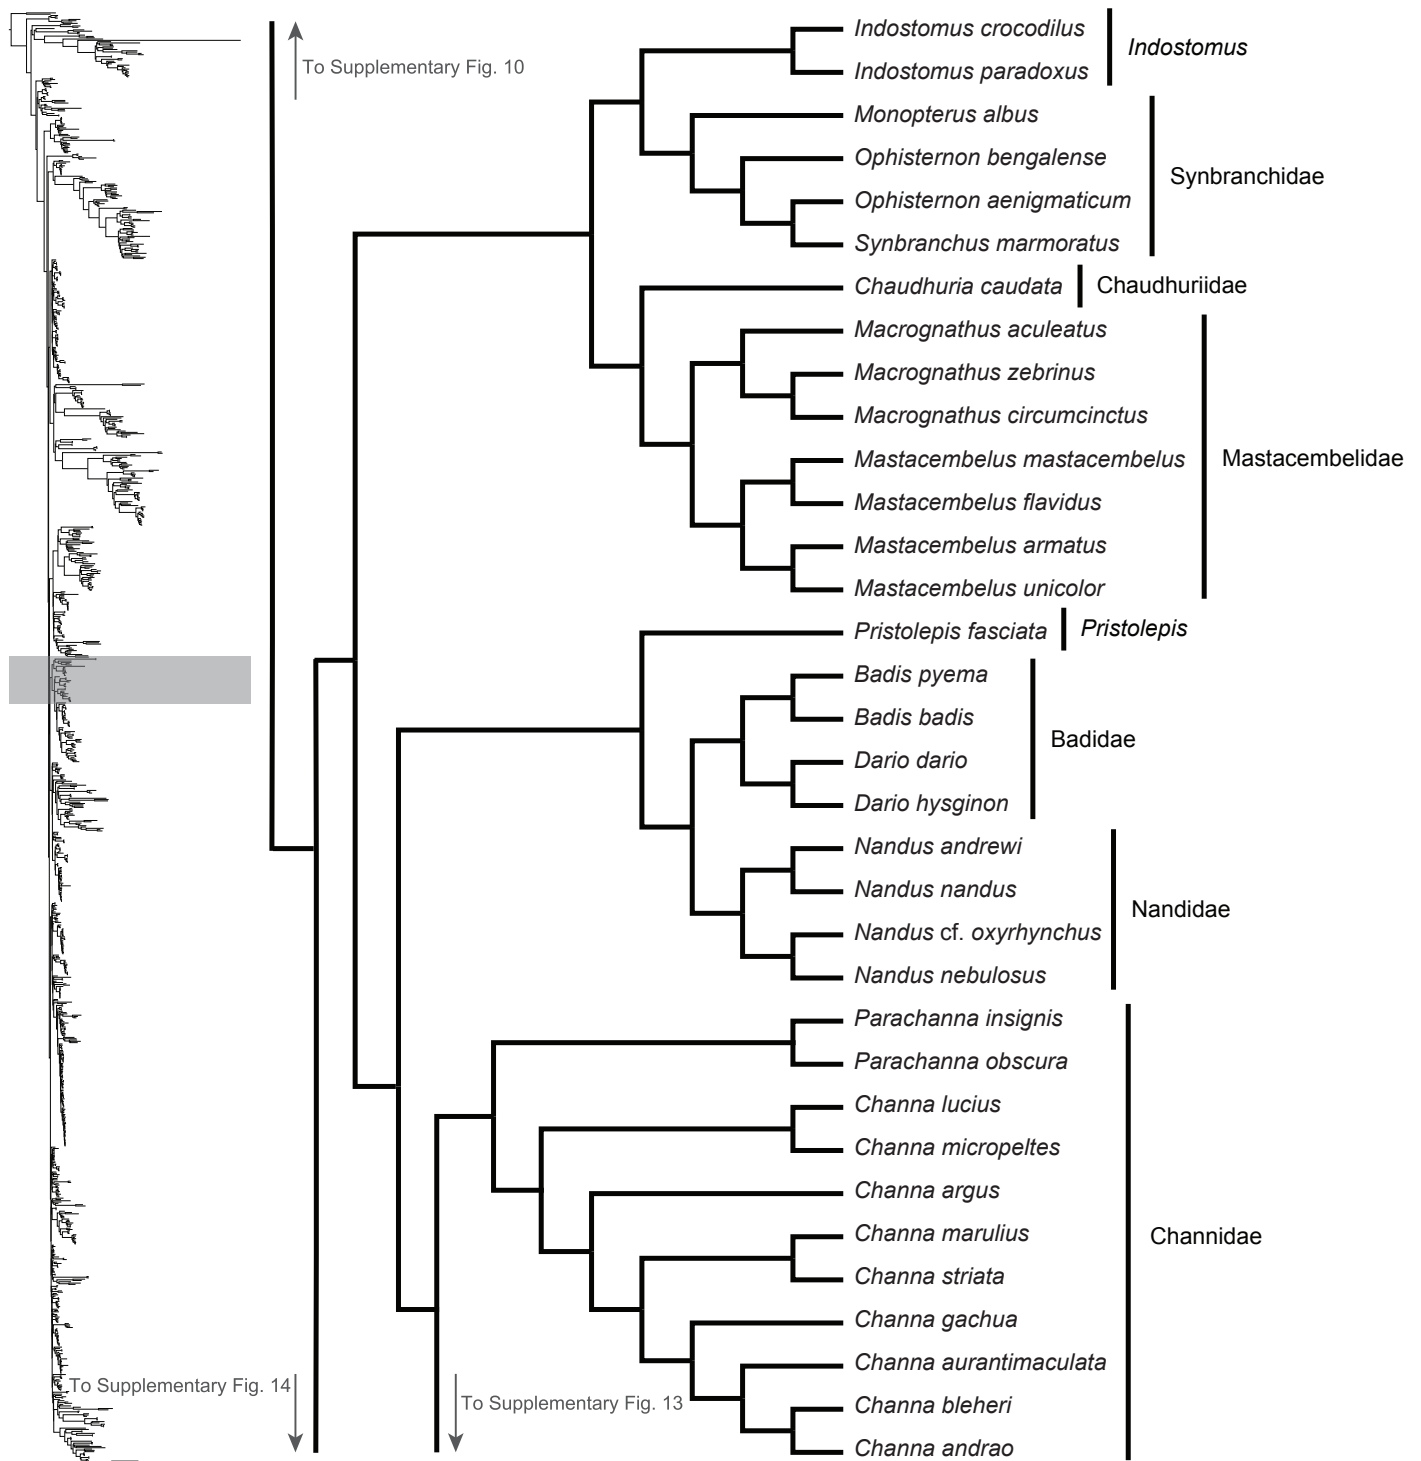

**Supplementary Fig. 12: Maximum likelihood phylogeny inferred in IQ-TREE.**

A guide tree on the left marks (with a gray rectangle), the region of the acanthomorph tree represented in the figure. All nodes have 100% bootstrap support. Orders, families or genera for taxa are listed to the right of the vertical black bars.



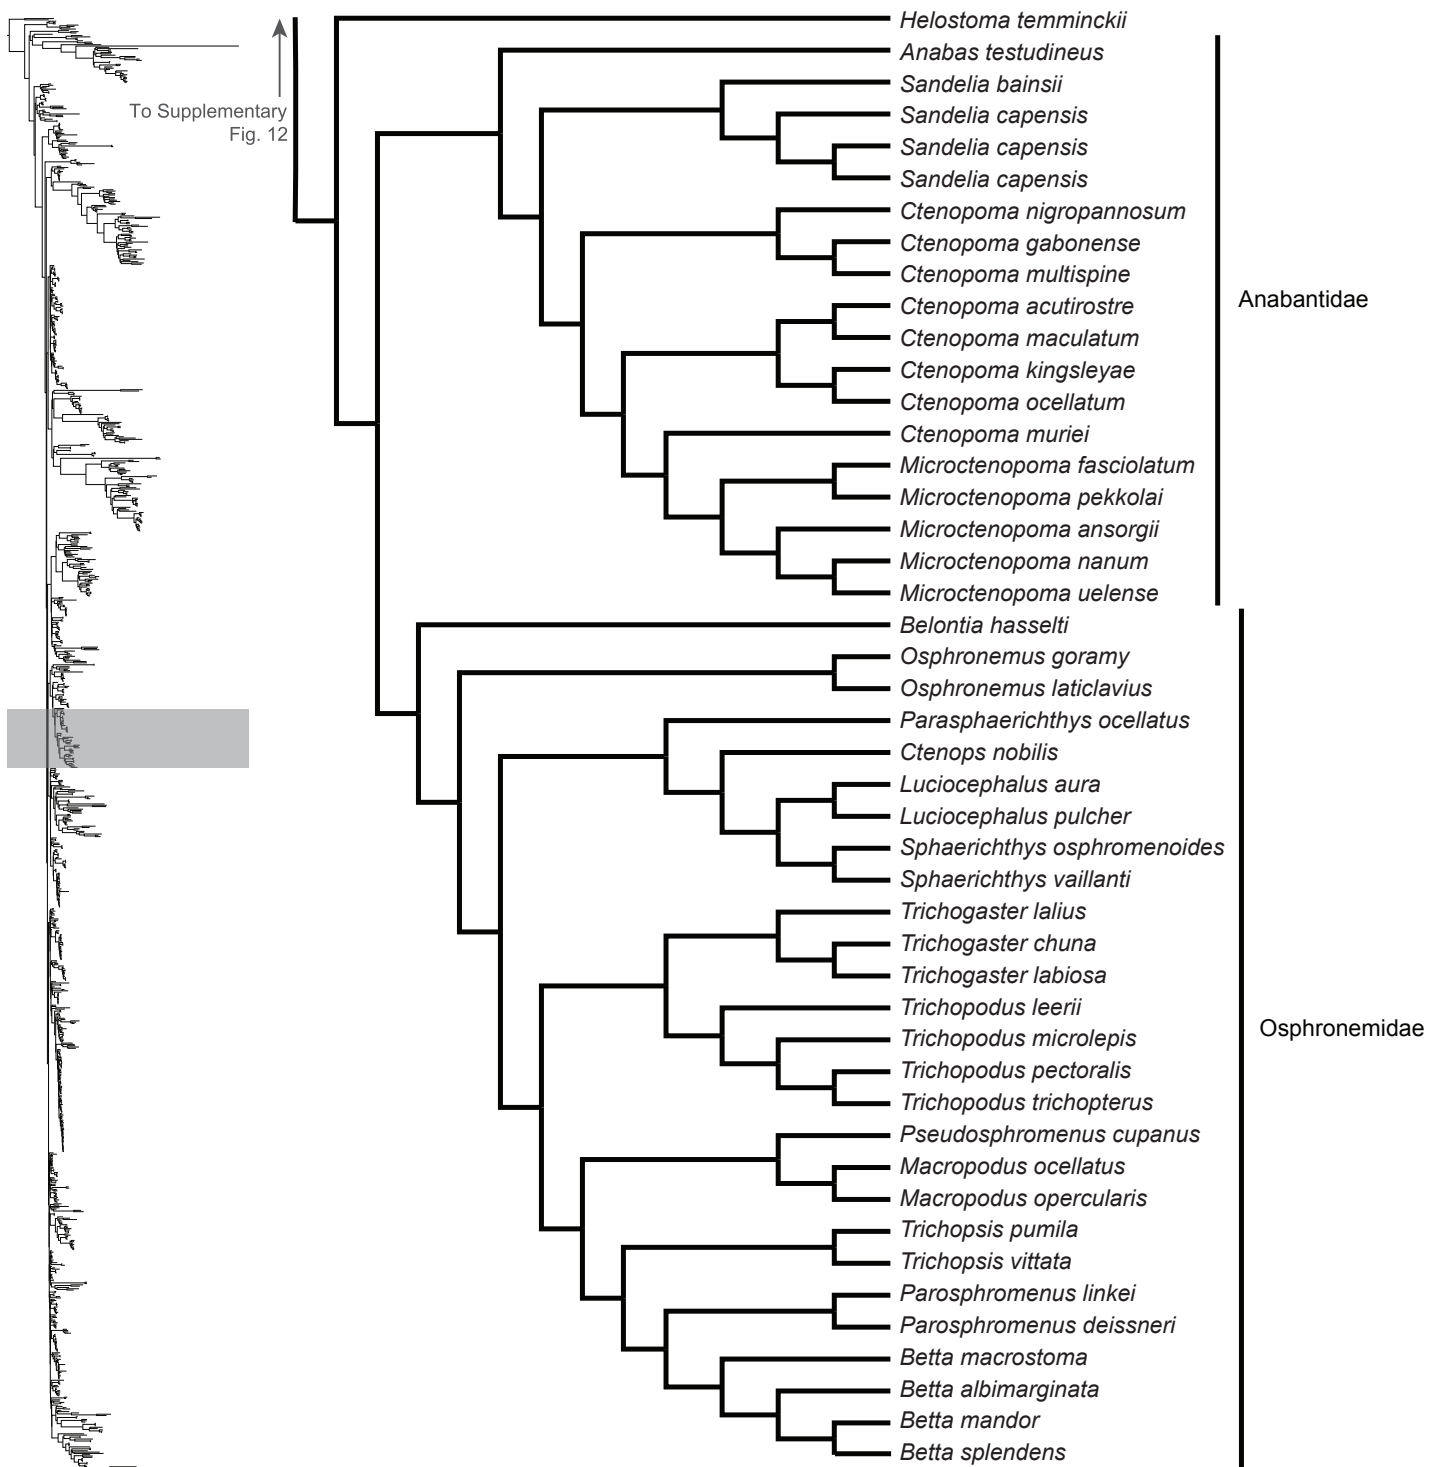

**Supplementary Fig. 13: Maximum likelihood phylogeny inferred in IQ-TREE.**

A guide tree on the left marks (with a gray rectangle), the region of the acanthomorph tree represented in the figure. All nodes have 100% bootstrap support. Orders, families or genera for taxa are listed to the right of the vertical black bars. Any tips left unassigned to a higher taxon are monospecific or monogeneric taxa.

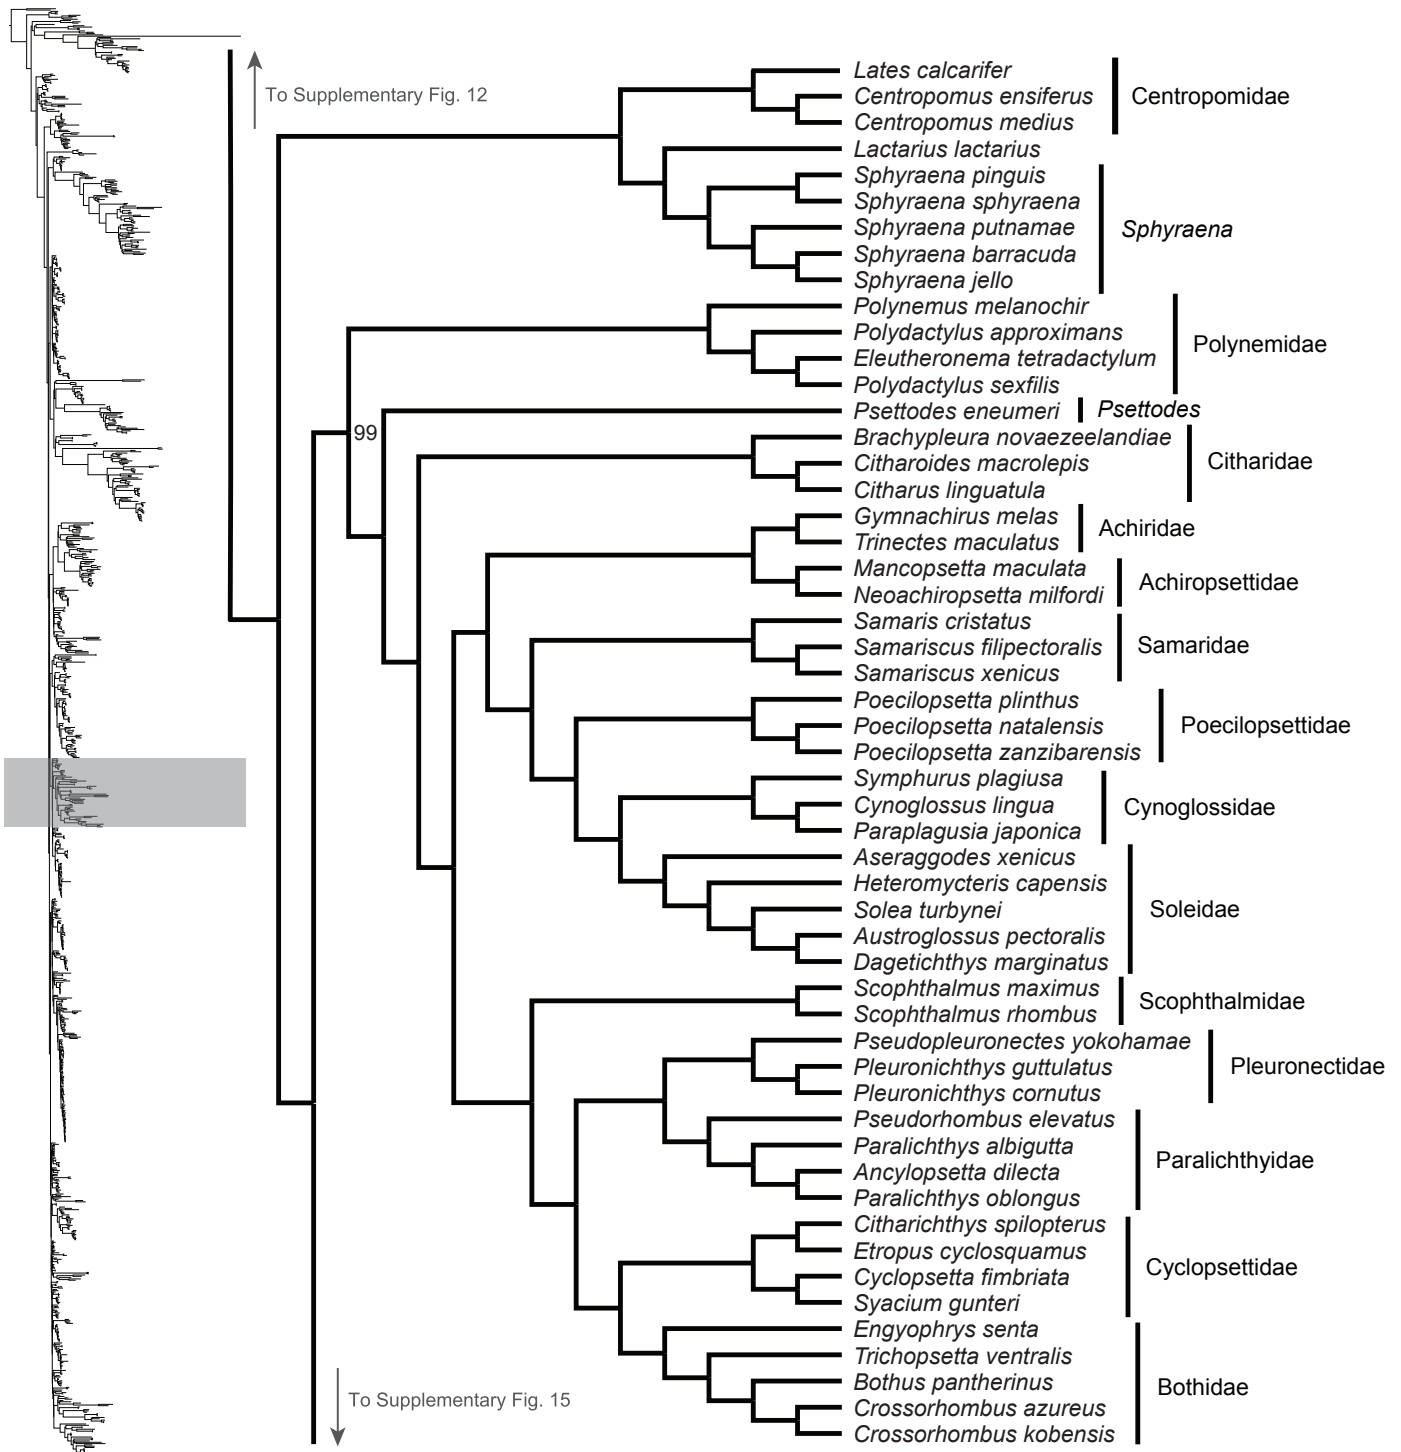

**Supplementary Fig. 14: Maximum likelihood phylogeny inferred in IQ-TREE.**

A guide tree on the left marks (with a gray rectangle), the region of the acanthomorph tree represented in the figure. Numbers at nodes reflect bootstrap support values. All nodes without a numerical annotation have 100% bootstrap support. Orders, families or genera for taxa are listed to the right of the vertical black bars. Any tips left unassigned to a higher taxon are monospecific or monogeneric taxa.

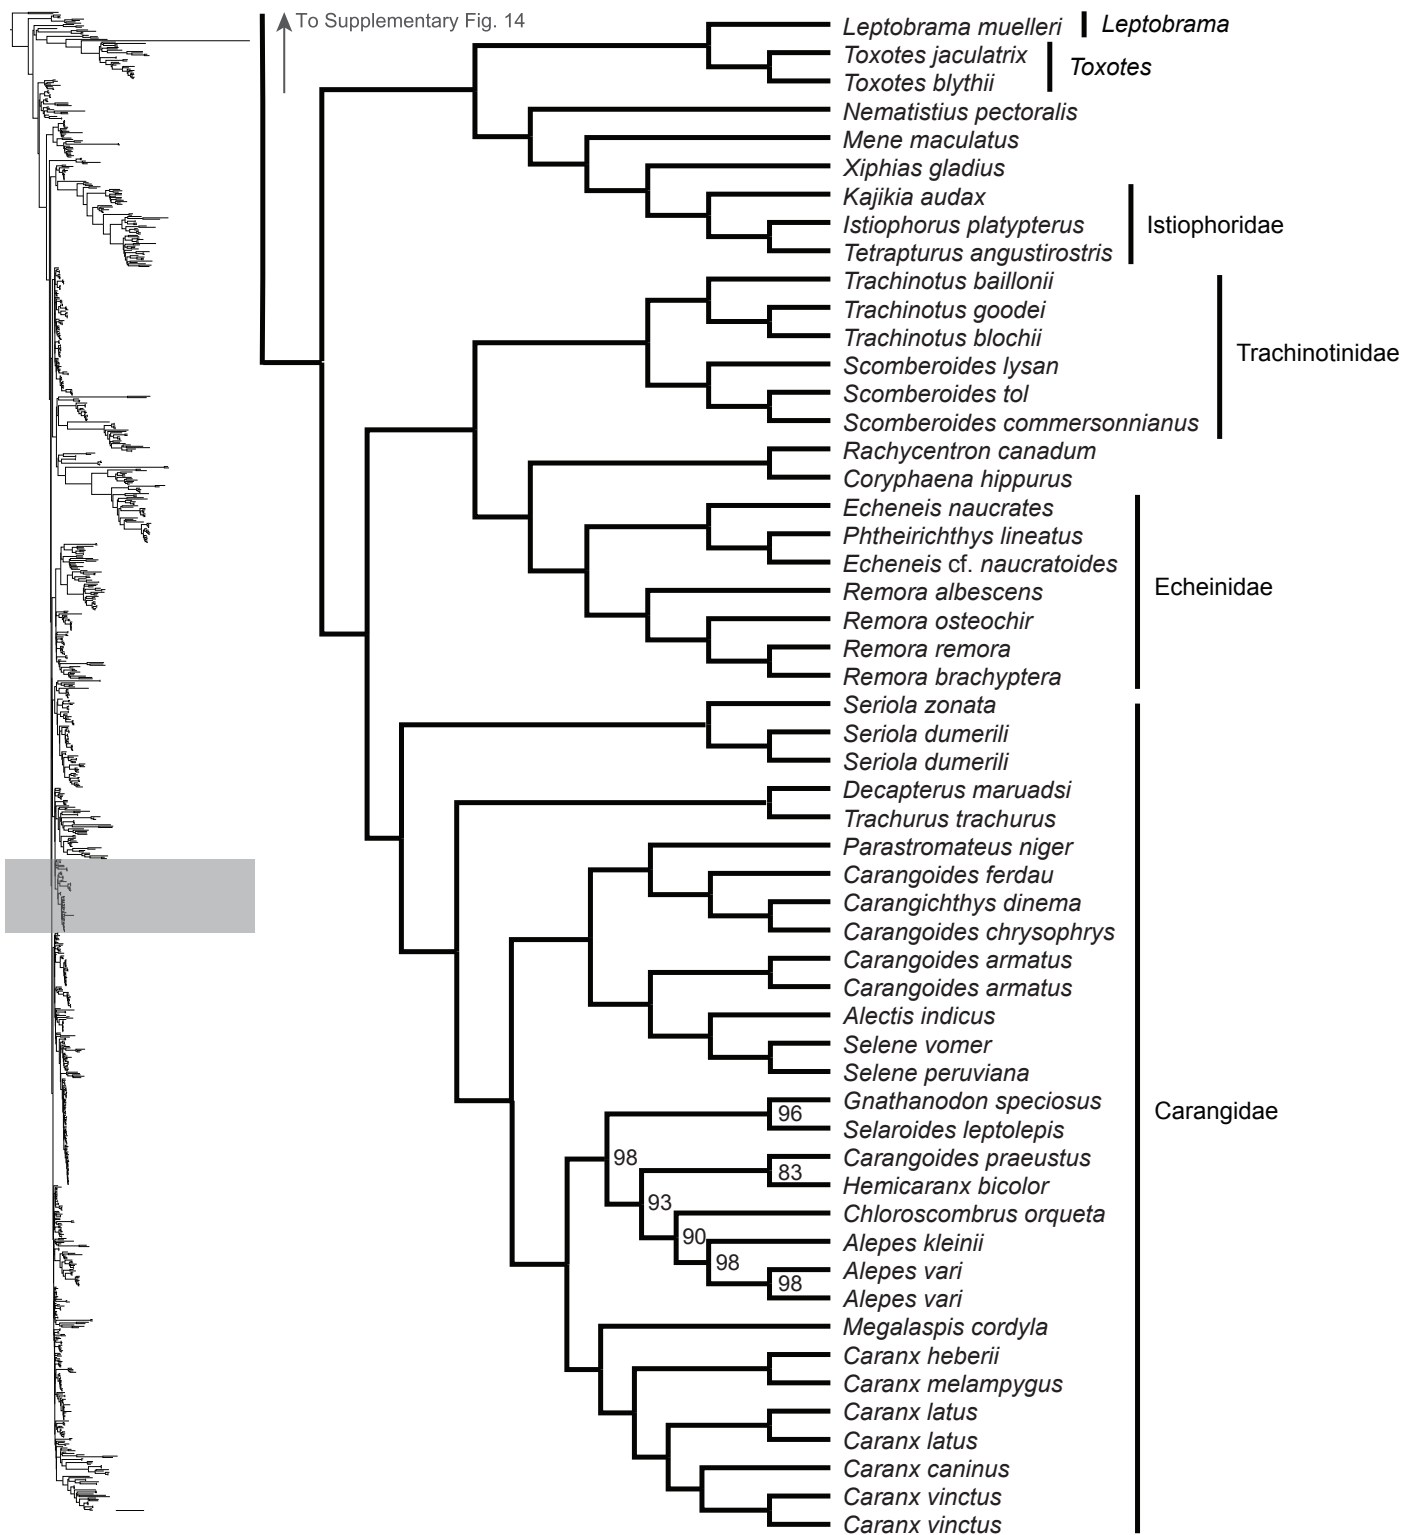

**Supplementary Fig. 15: Maximum likelihood phylogeny inferred in IQ-TREE**

A guide tree on the left marks (with a gray rectangle), the region of the acanthomorph tree represented in the figure. Numbers at nodes reflect bootstrap support values. All nodes without a numerical annotation have 100% bootstrap support. Orders, families or genera for taxa are listed to the right of the vertical black bars. Any tips left unassigned to a higher taxon are monospecific or monogeneric taxa.

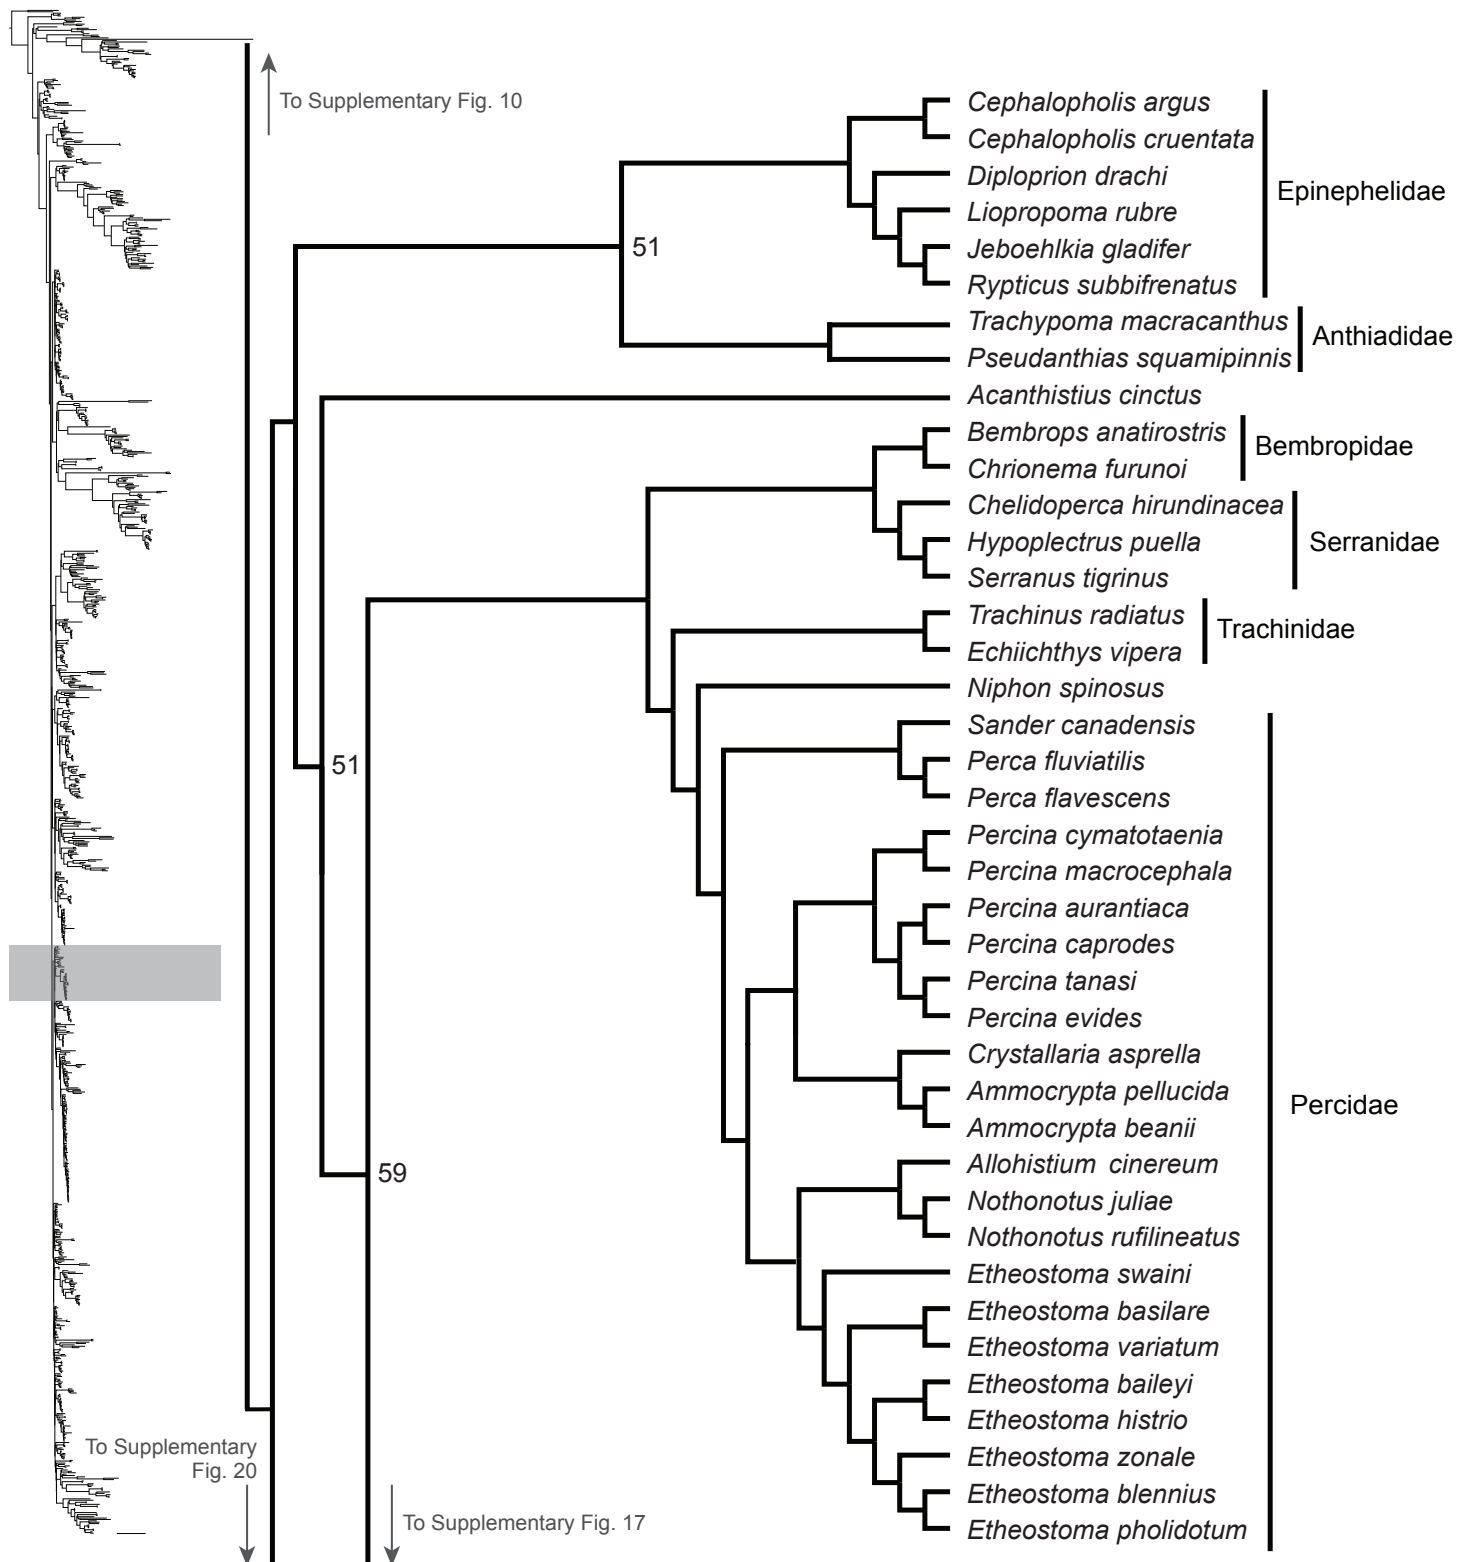

**Supplementary Fig. 16: Maximum likelihood phylogeny inferred in IQ-TREE.**

A guide tree on the left marks (with a gray rectangle), the region of the acanthomorph tree represented in the figure. Numbers at nodes reflect bootstrap support values. All nodes without a numerical annotation have 100% bootstrap support. Orders, families or genera for taxa are listed to the right of the vertical black bars. Any tips left unassigned to a higher taxon are monospecific or monogeneric taxa.

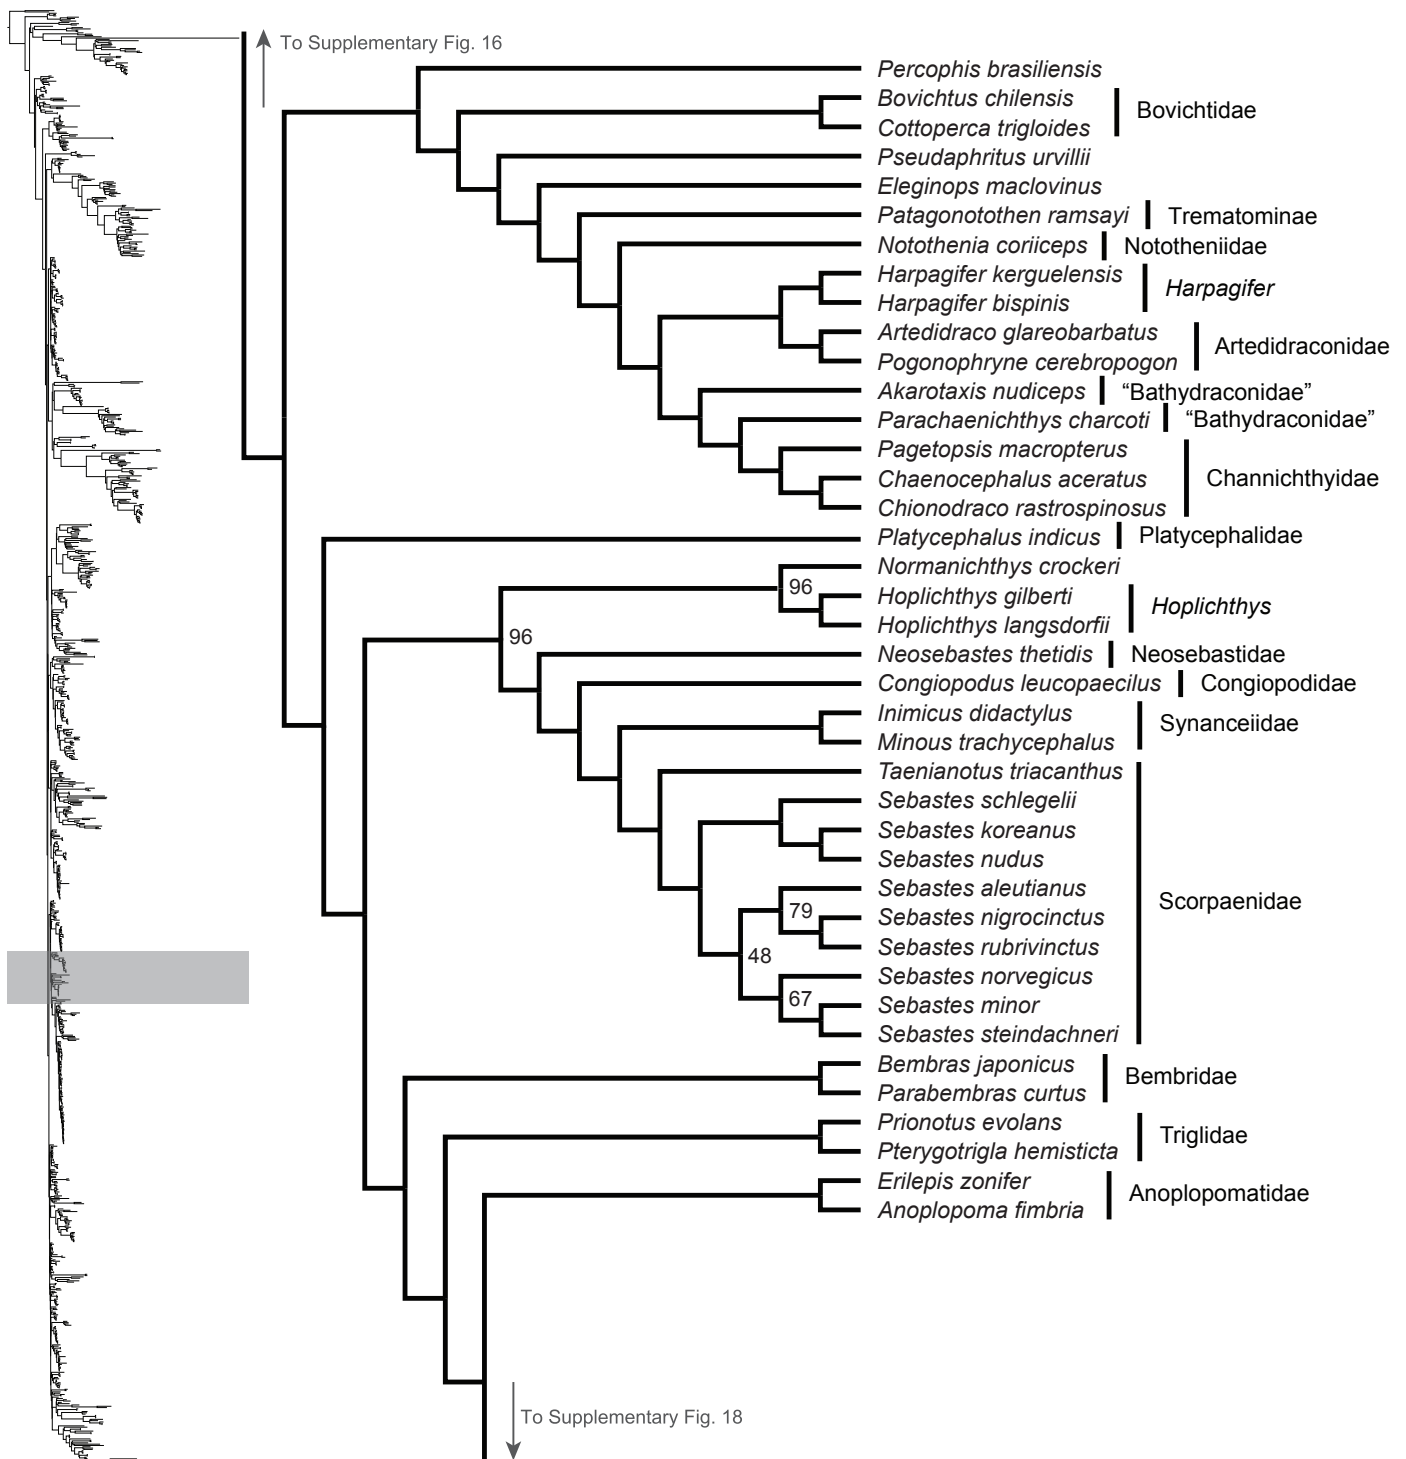

**Supplementary Fig. 17: Maximum likelihood phylogeny inferred in IQ-TREE.**

A guide tree on the left marks (with a gray rectangle), the region of the acanthomorph tree represented in the figure. Numbers at nodes reflect bootstrap support values. All nodes without a numerical annotation have 100% bootstrap support. Orders, families or genera for taxa are listed to the right of the vertical black bars. Any tips left unassigned to a higher taxon are monospecific or monogeneric taxa.

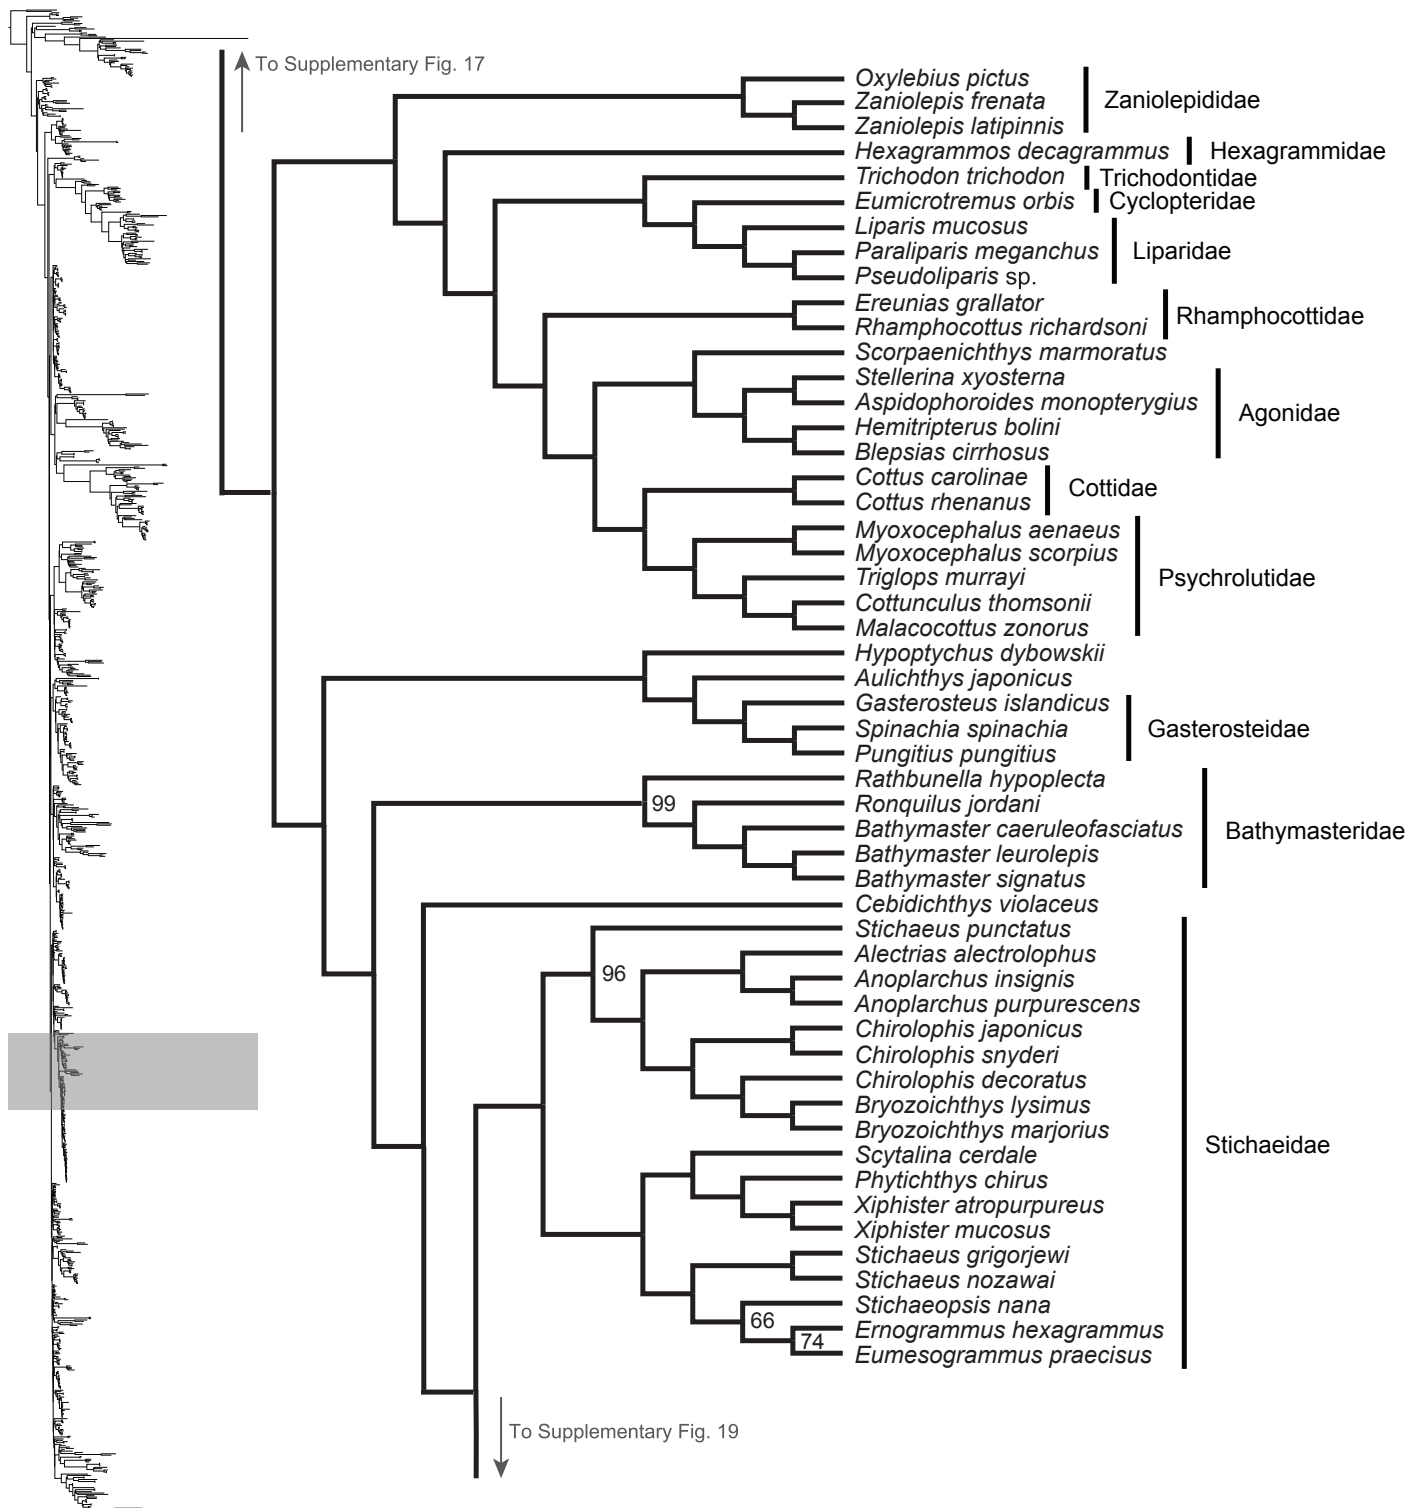

**Supplementary Fig. 18: Maximum likelihood phylogeny inferred in IQ-TREE.**

A guide tree on the left marks (with a gray rectangle), the region of the acanthomorph tree represented in the figure. Numbers at nodes reflect bootstrap support values. All nodes without a numerical annotation have 100% bootstrap support. Orders, families or genera for taxa are listed to the right of the vertical black bars. Any tips left unassigned to a higher taxon are monospecific or monogeneric taxa.

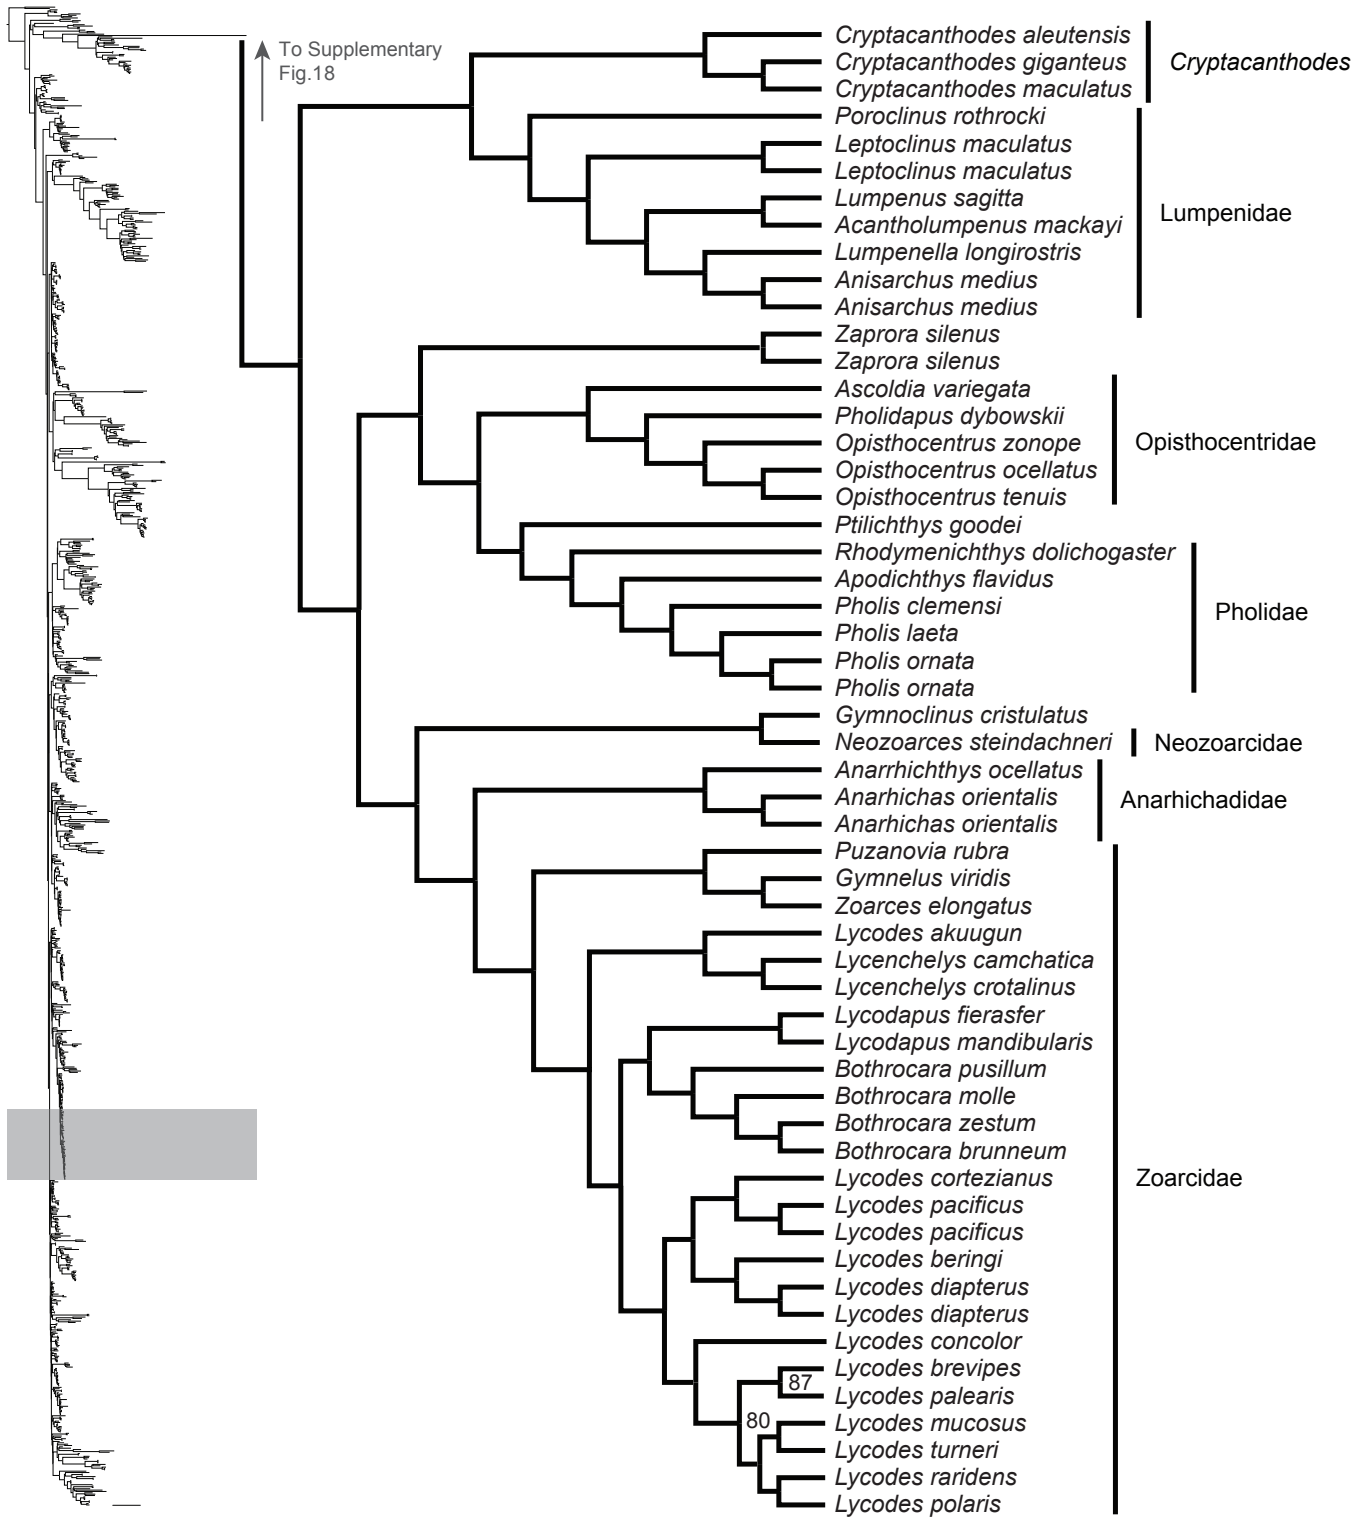

**Supplementary Fig. 19: Maximum likelihood phylogeny inferred in IQ-TREE.**

A guide tree on the left marks (with a gray rectangle), the region of the acanthomorph tree represented in the figure. Numbers at nodes reflect bootstrap support values. All nodes without a numerical annotation have 100% bootstrap support. Orders, families or genera for taxa are listed to the right of the vertical black bars. Any tips left unassigned to a higher taxon are monospecific or monogeneric taxa.

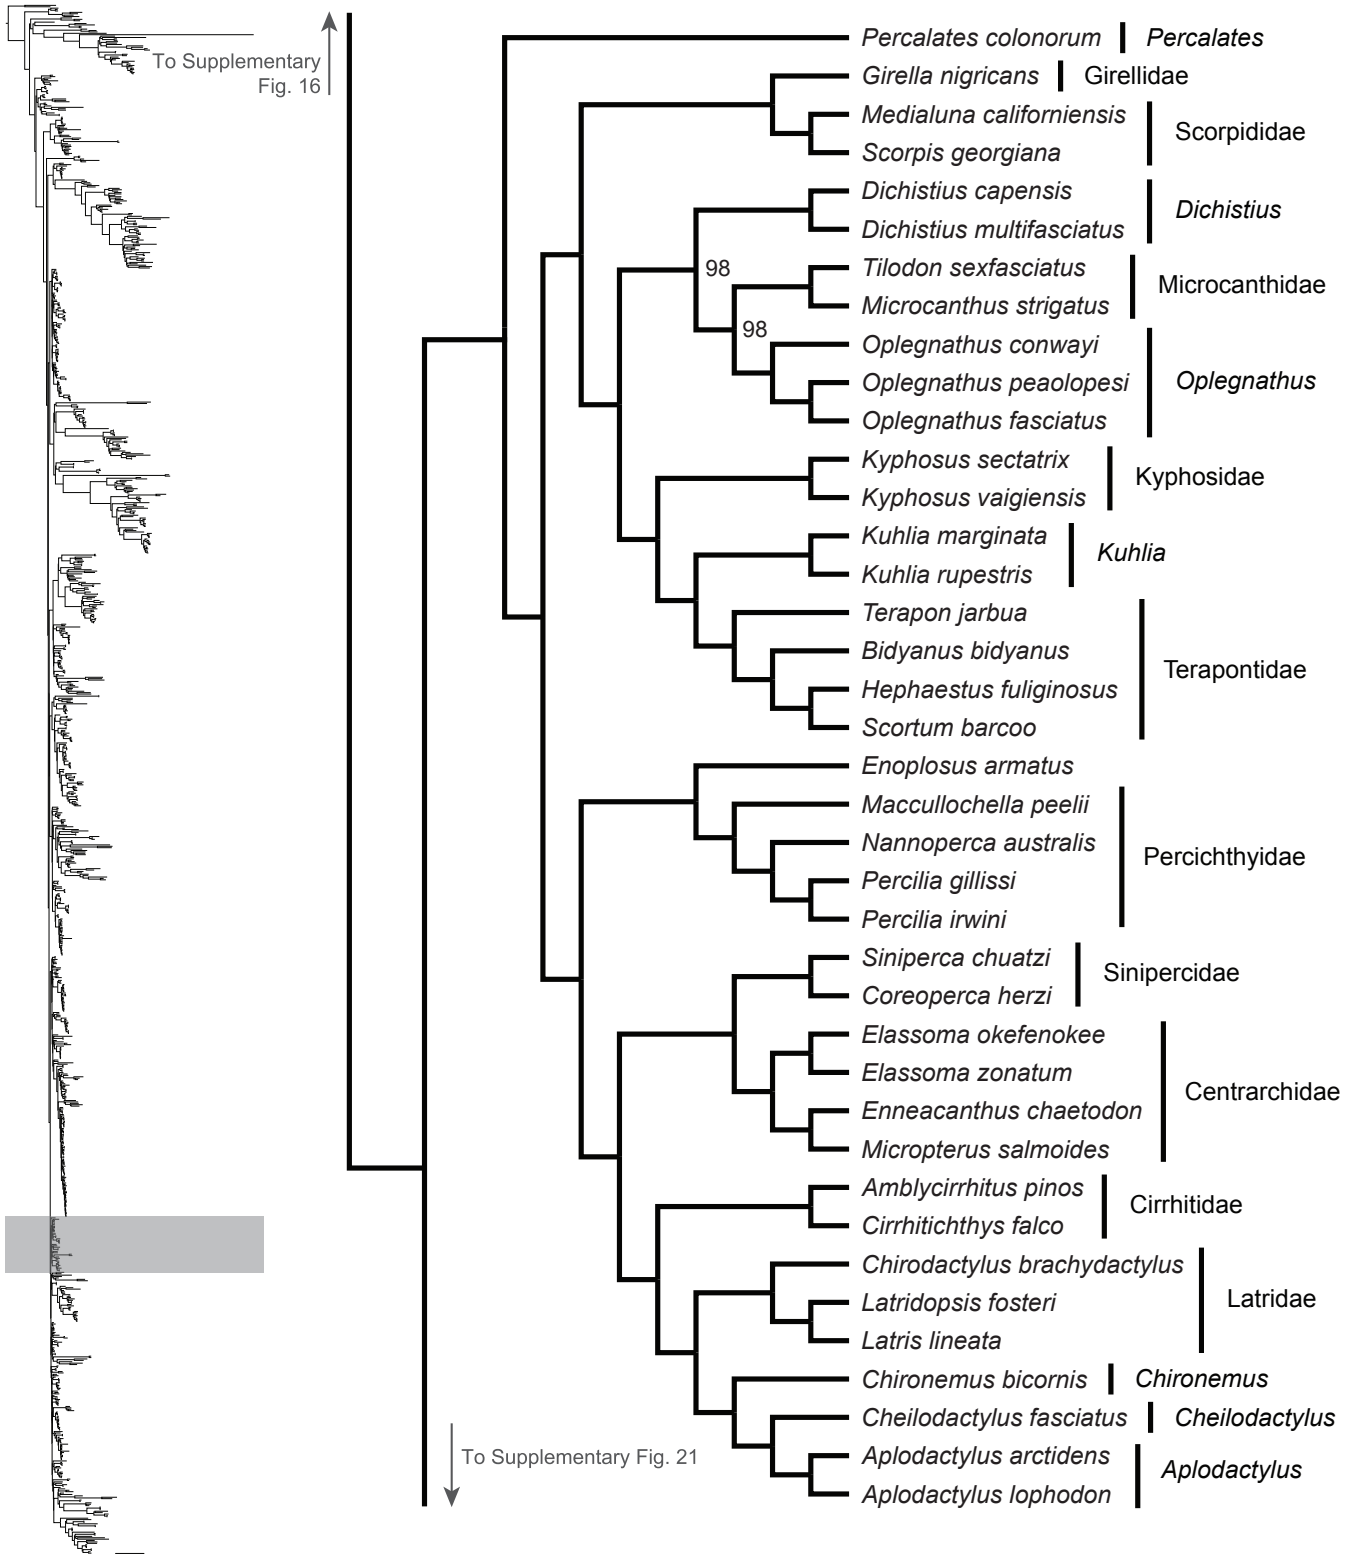

**Supplementary Fig. 20: Maximum likelihood phylogeny inferred in IQ-TREE.**

A guide tree on the left marks (with a gray rectangle), the region of the acanthomorph tree represented in the figure. Numbers at nodes reflect bootstrap support values. All nodes without a numerical annotation have 100% bootstrap support. Orders, families or genera for taxa are listed to the right of the vertical black bars. Any tips left unassigned to a higher taxon are monospecific or monogeneric taxa.



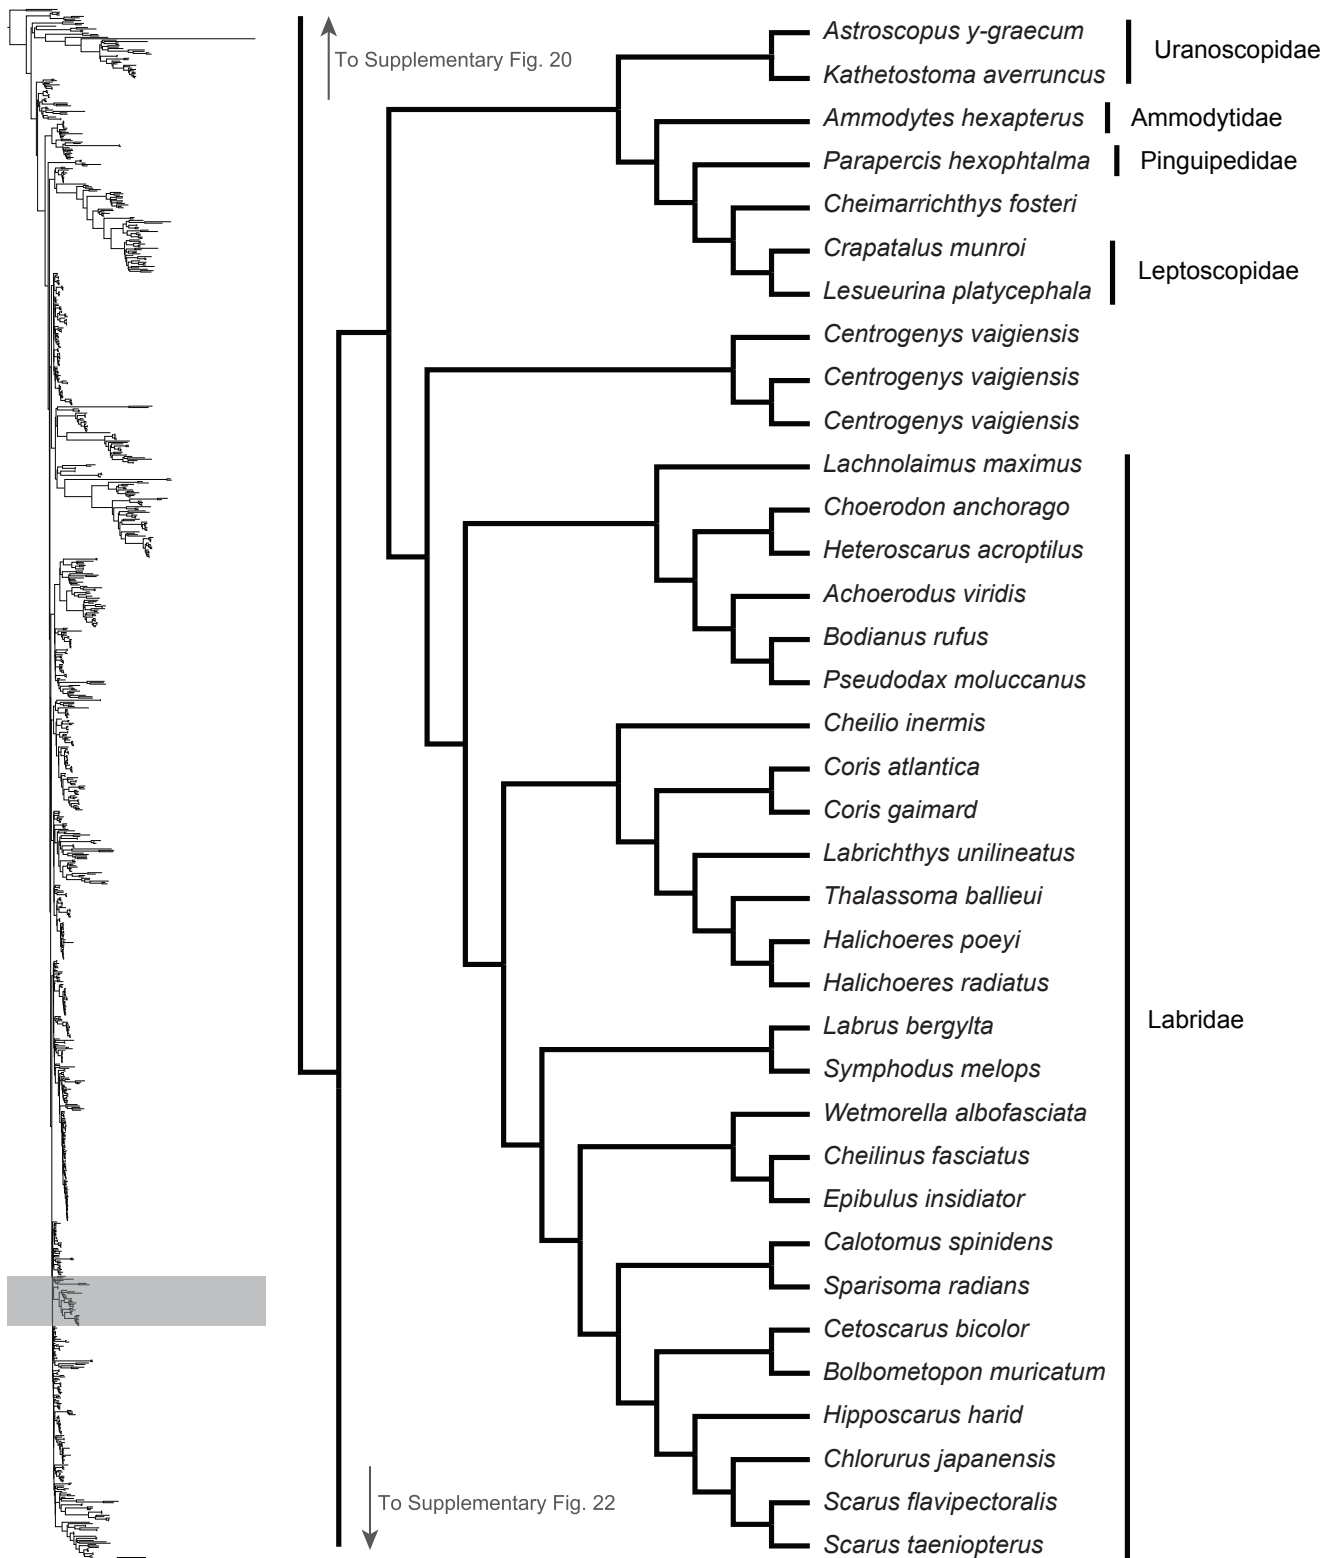

**Supplementary Fig. 21: Maximum likelihood phylogeny inferred in IQ-TREE.**

A guide tree on the left marks (with a gray rectangle), the region of the acanthomorph tree represented in the figure. All nodes have 100% bootstrap support. Orders, families or genera for taxa are listed to the right of the vertical black bars. Any tips left unassigned to a higher taxon are monospecific or monogeneric taxa.

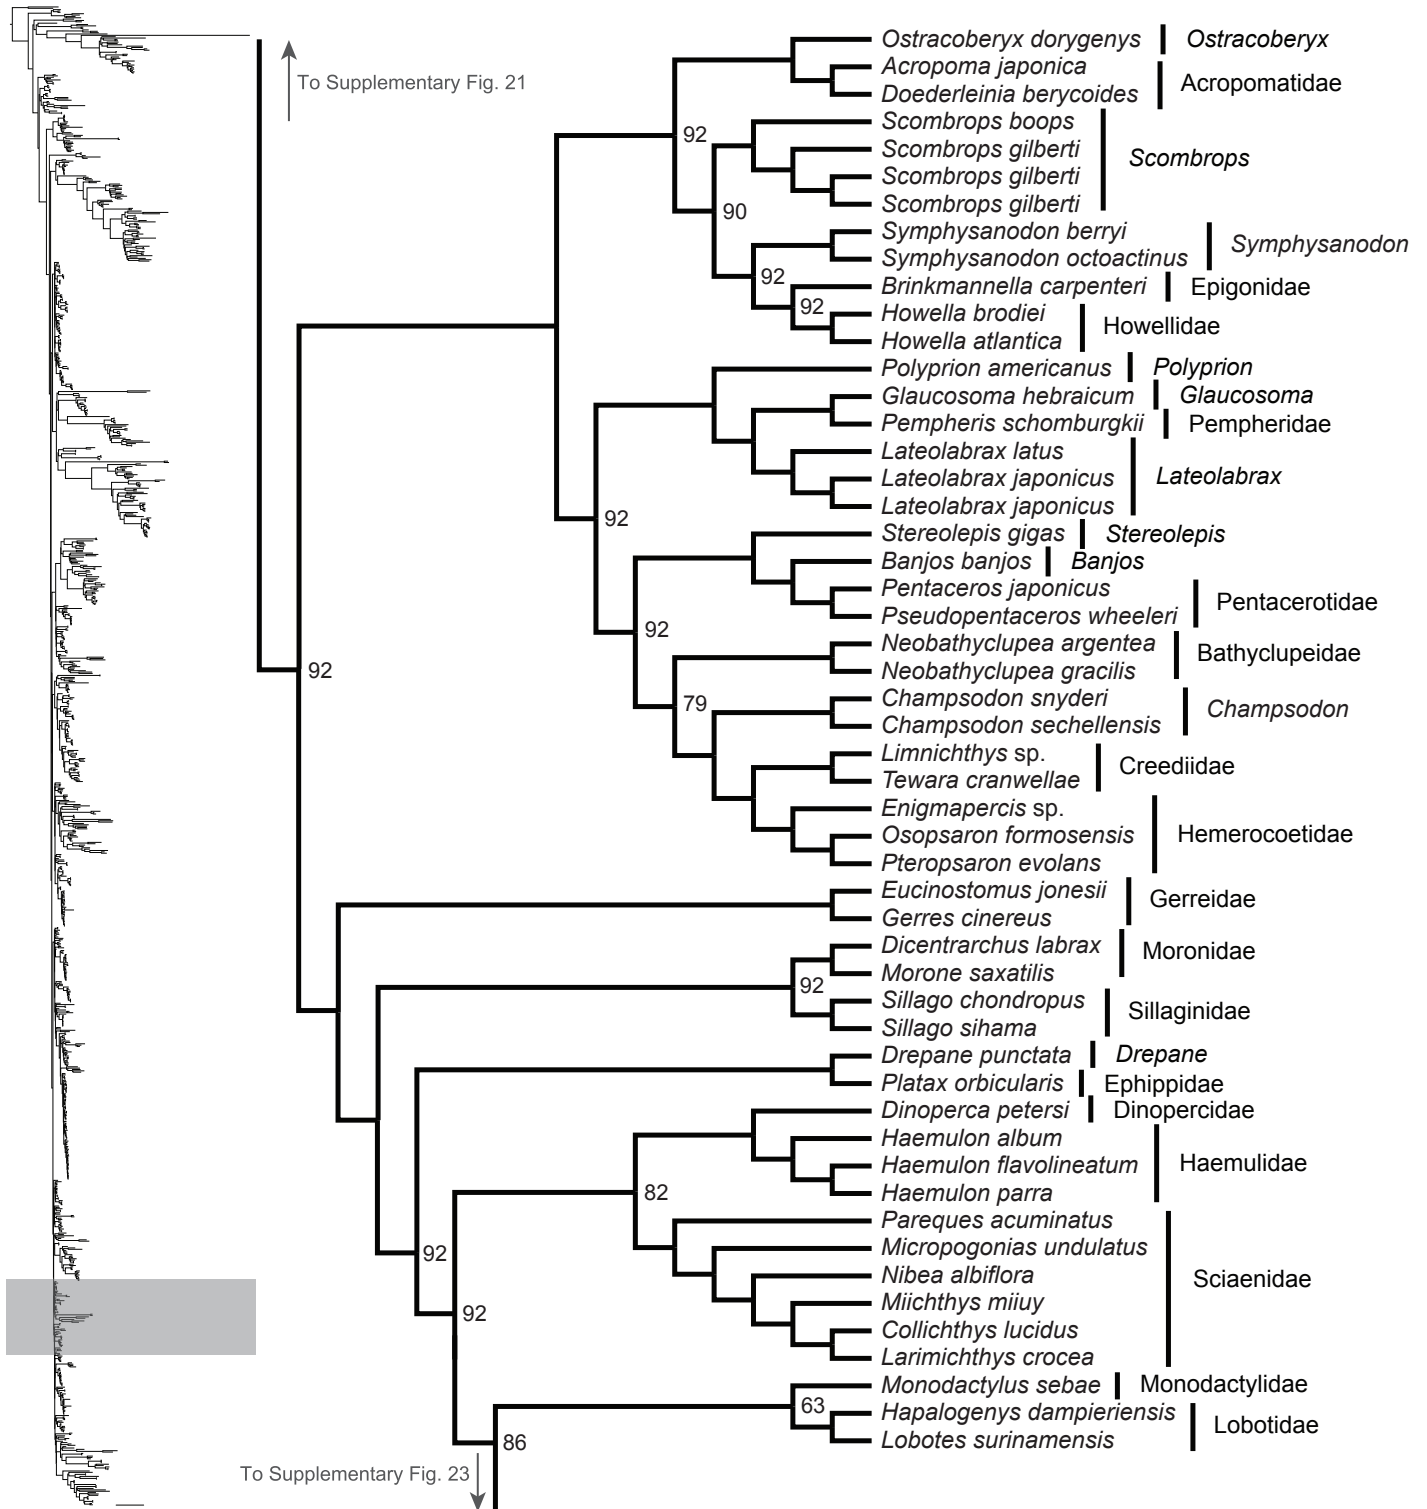

**Supplementary Fig. 22: Maximum likelihood phylogeny inferred in IQ-TREE.**

A guide tree on the left marks (with a gray rectangle), the region of the acanthomorph tree represented in the figure. Numbers at nodes reflect bootstrap support values. All nodes without a numerical annotation have 100% bootstrap support. Orders, families or genera for taxa are listed to the right of the vertical black bars.

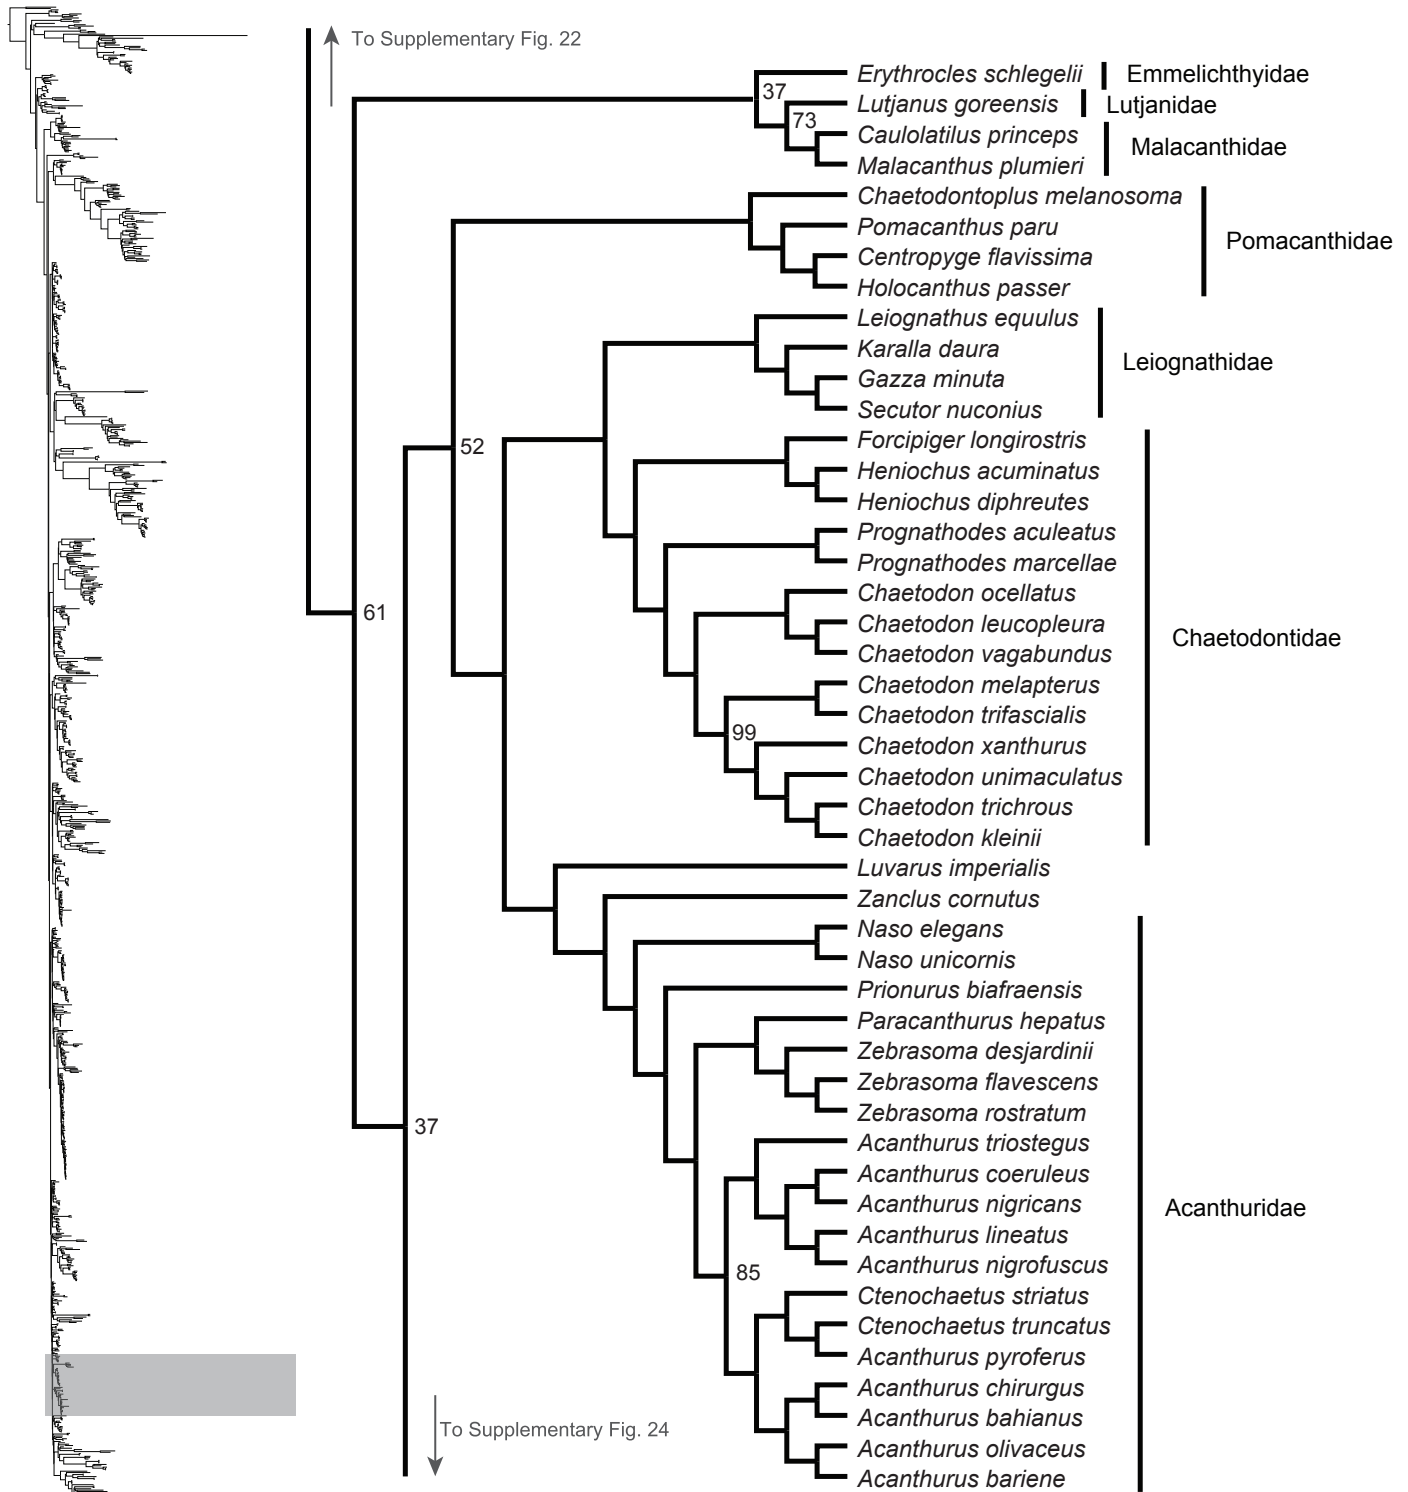

**Supplementary Fig. 23: Maximum likelihood phylogeny inferred in IQ-TREE.**

A guide tree on the left marks (with a gray rectangle), the region of the acanthomorph tree represented in the figure. Numbers at nodes reflect bootstrap support values. All nodes without a numerical annotation have 100% bootstrap support. Orders, families or genera for taxa are listed to the right of the vertical black bars. Any tips left unassigned to a higher taxon are monospecific or monogeneric taxa.

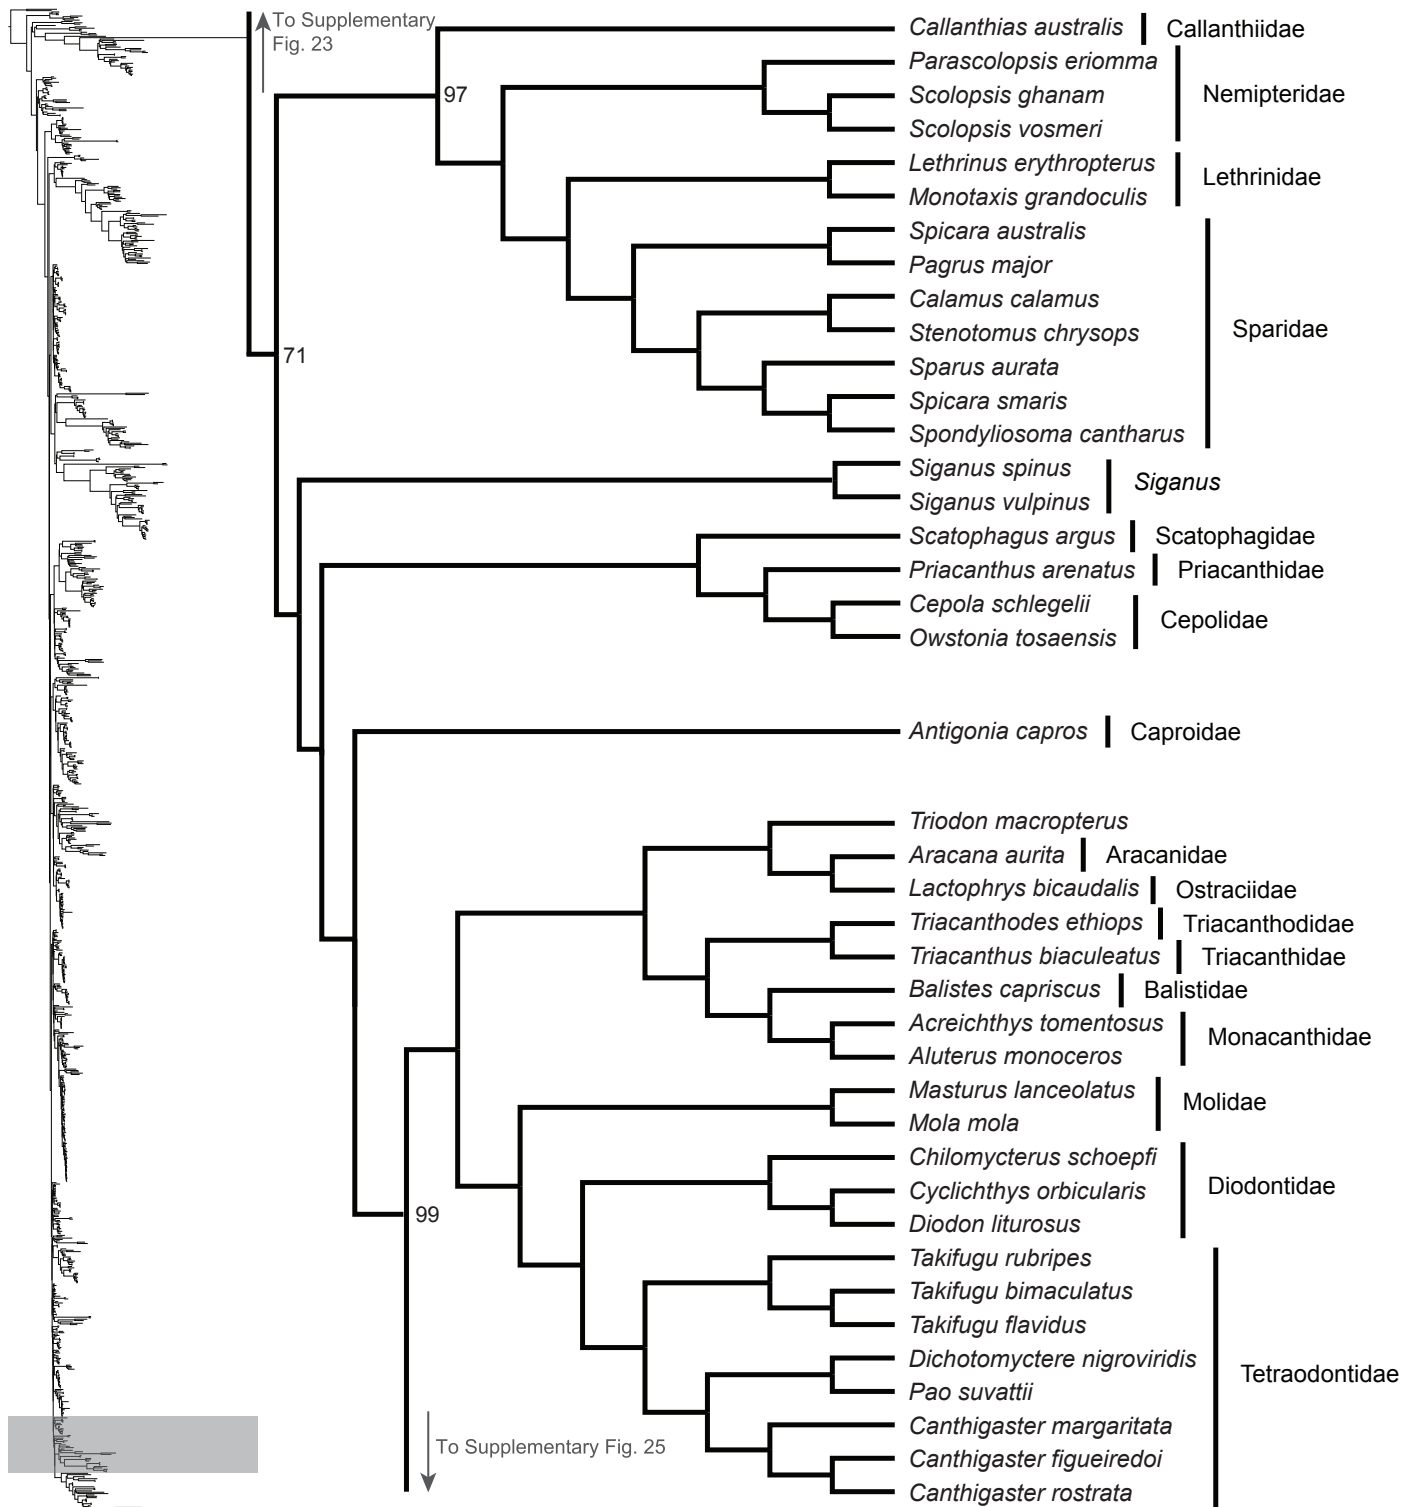

**Supplementary Fig. 24: Maximum likelihood phylogeny inferred in IQ-TREE.**

A guide tree on the left marks (with a gray rectangle), the region of the acanthomorph tree represented in the figure. Numbers at nodes reflect bootstrap support values. All nodes without a numerical annotation have 100% bootstrap support. Orders, families or genera for taxa are listed to the right of the vertical black bars. Any tips left unassigned to a higher taxon are monospecific taxa.

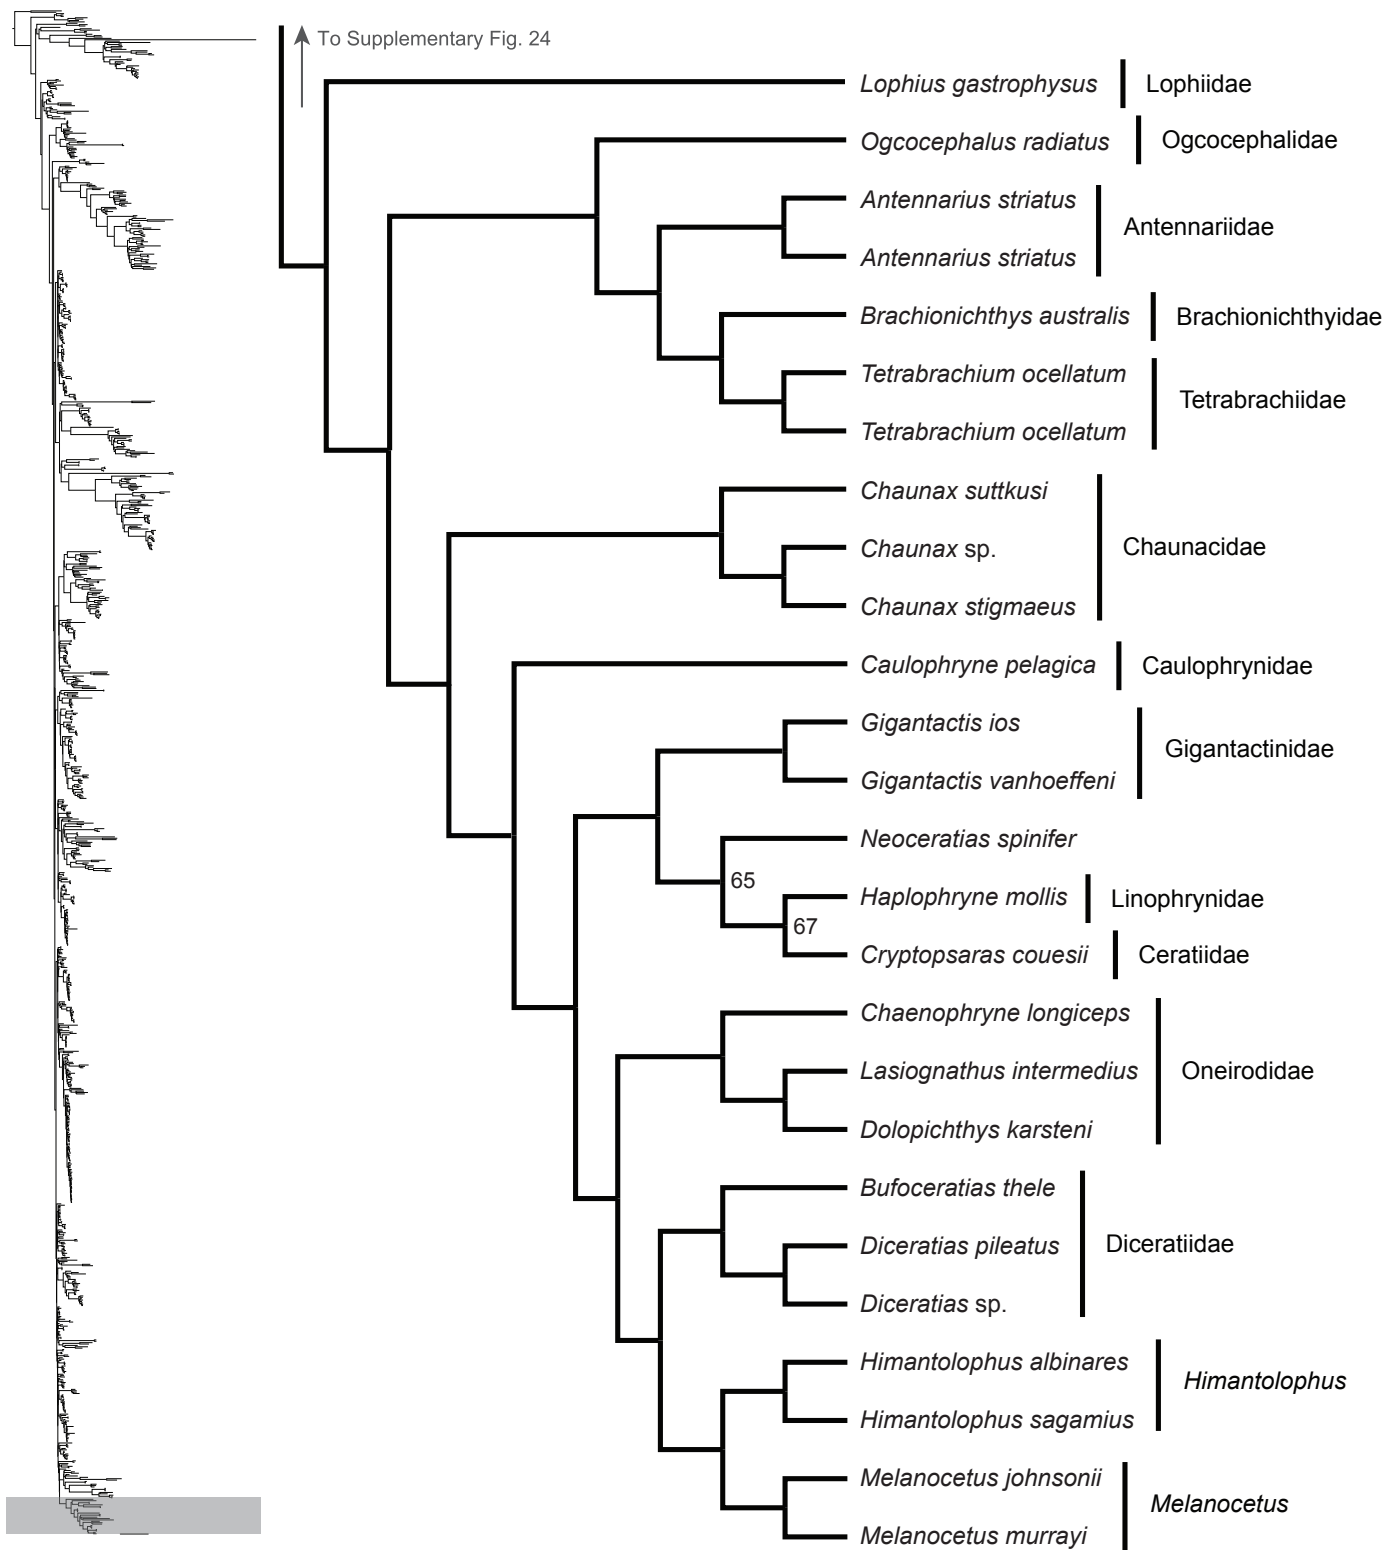

**Supplementary Fig. 25: Maximum likelihood phylogeny inferred in IQ-TREE.**

A guide tree on the left marks (with a gray rectangle), the region of the acanthomorph tree represented in the figure. Numbers at nodes reflect bootstrap support values. All nodes without a numerical annotation have 100% bootstrap support. Orders, families or genera for taxa are listed to the right of the vertical black bars. Any tips left unassigned to a higher taxon are monospecific or monogeneric taxa.

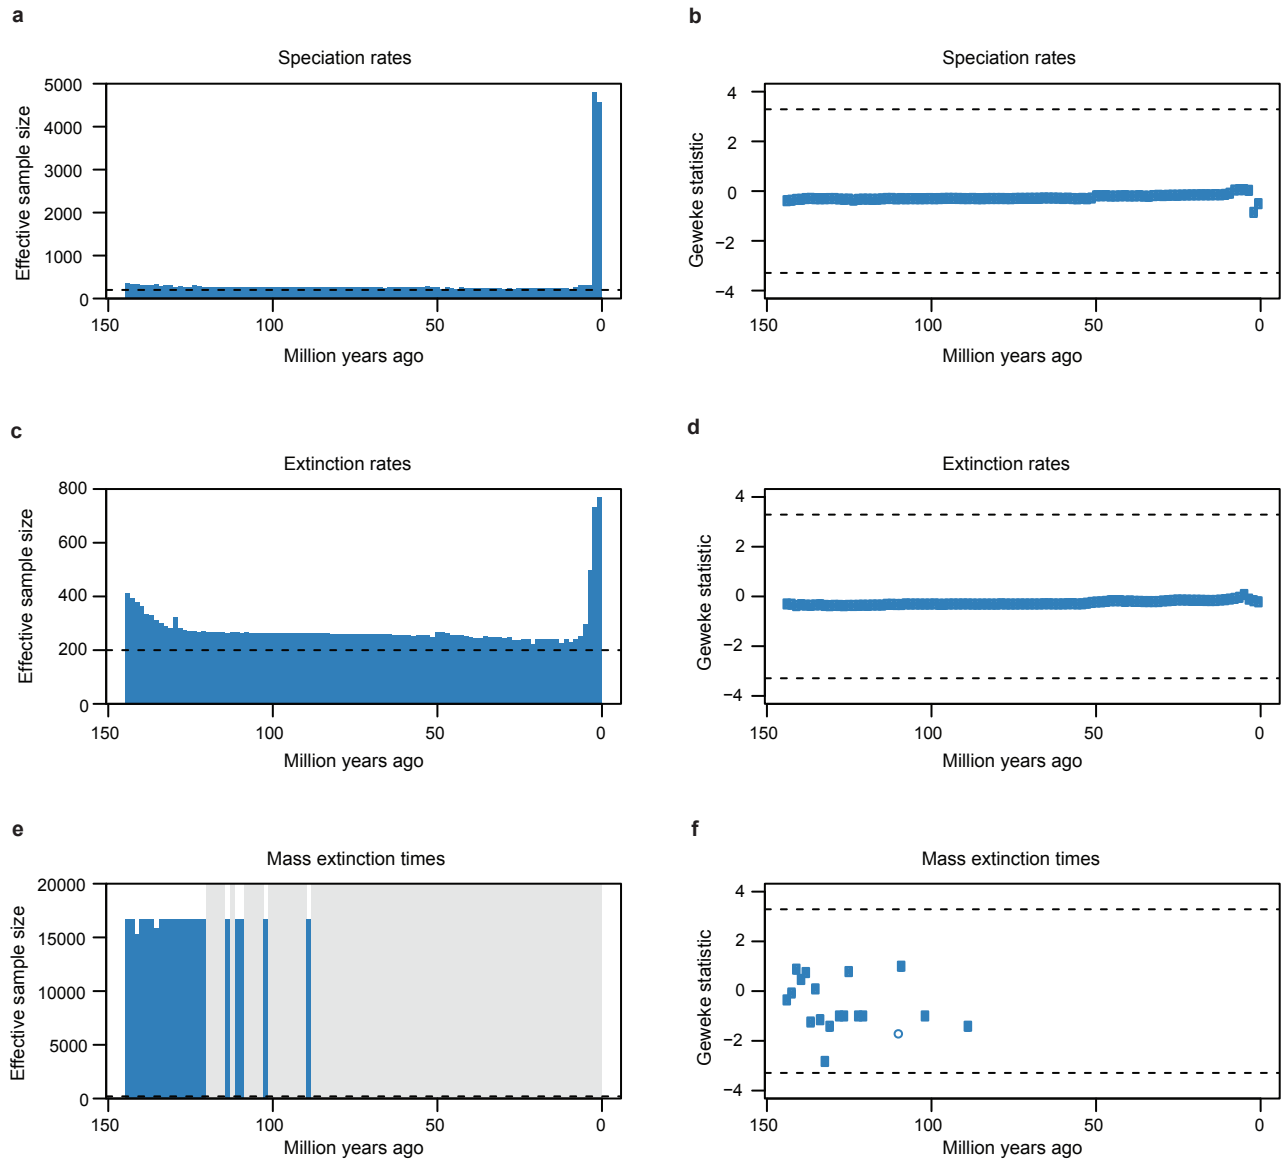

**Supplementary Fig. 26: Effective sample sizes (ESS) of parameters and Geweke diagnostics reflect within-chain convergence in the TESS-CoMET analysis depicted in Extended Data Fig. 1.**

Blue bars and dots reflect that the run successfully converged for the parameter at a given time interval. Horizontal dashed lines reflect canonical, acceptable threshold values or 95% confidence intervals for the two diagnostics (ESS  $\geq 200$  for **a**, **c**, and **e**;  $P > 0.05$  for **b**, **d**, and **f**). **a**, Effective sample size for speciation rate estimates. **b**, Geweke statistic for post-burn-in speciation rate estimates. **c**, Effective sample size for extinction rate estimates. **d**, Geweke statistic for post-burn-in extinction rate estimates. **e**, Effective sample size for mass extinction times. **f**, Geweke statistic for post-burn-in mass extinction times.

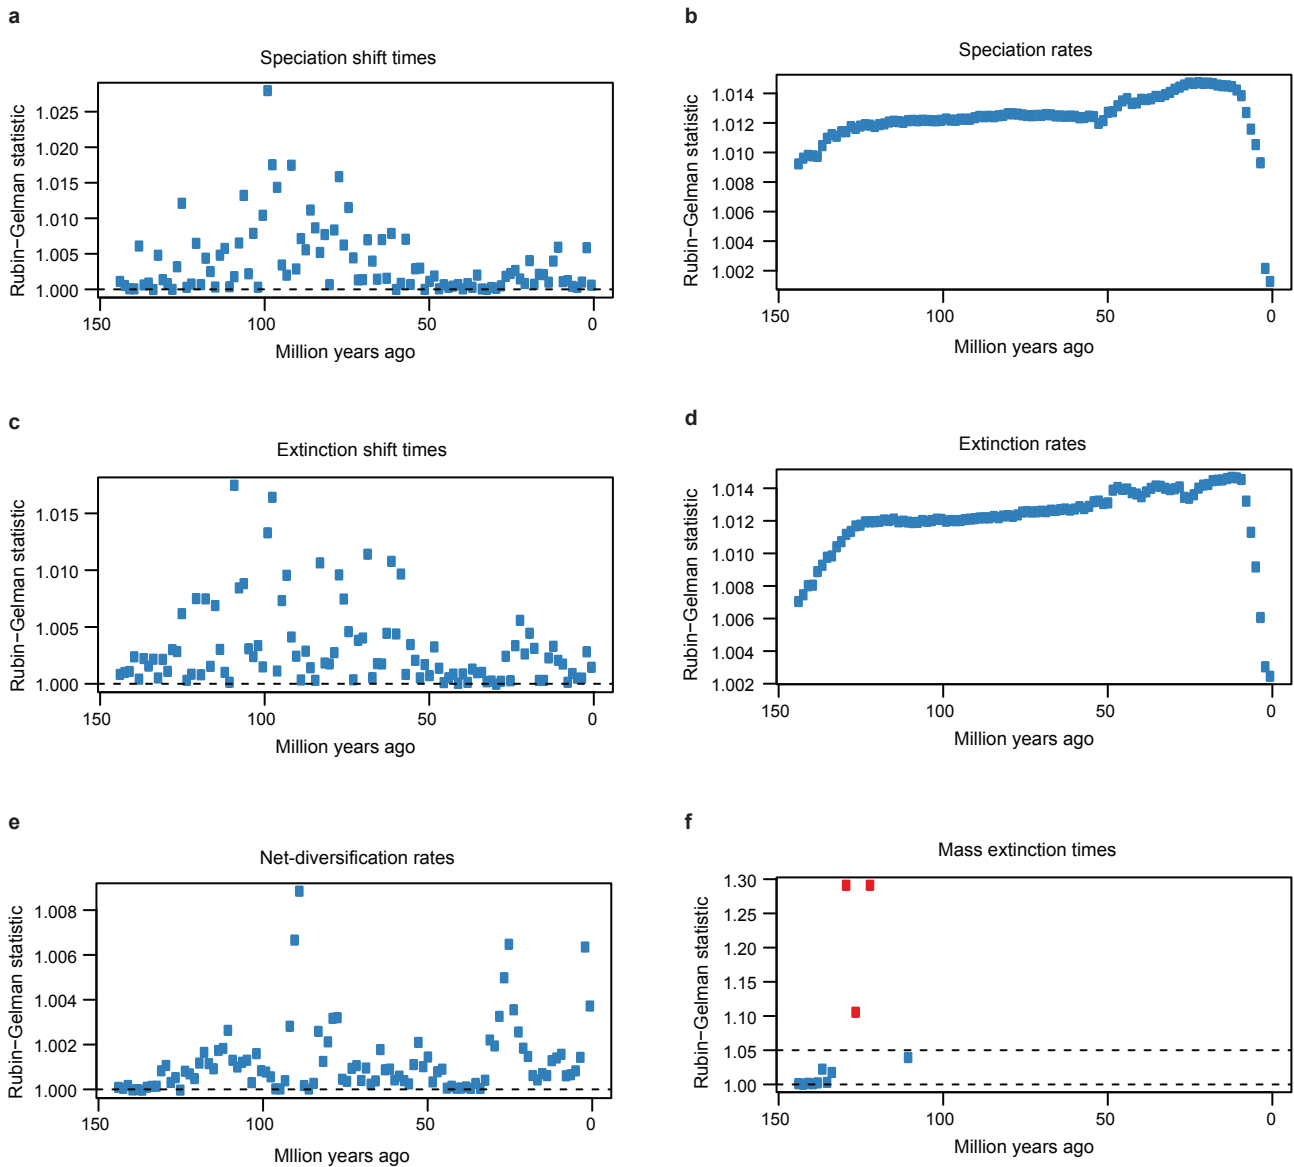

**Supplementary Fig. 27: Results of the Gelman-Rubin test show convergence of three independent replicates of the TESS-CoMET analysis represented in Extended Data Fig. 1.** Blue dots indicate that the ratio of within-chain variance to between-chain variance is  $<1.05$ , suggesting the independent MCMC simulations have converged on the same distribution of parameter values. Red dots indicate failed convergence of runs for those time interval-specific parameter estimates. Horizontal dashed lines represent the ideal value (1.00) for the diagnostic. **a**, Rubin-Gelman statistic for speciation shift times. **b**, Rubin-Gelman statistic for speciation rates. **c**, Rubin-Gelman statistic for extinction shift times. **d**, Rubin-Gelman statistic for extinction rates. **e**, Rubin-Gelman statistic for net-diversification rates. **f**, Rubin-Gelman statistic for mass extinction time estimates. A second horizontal dashed line marks the critical value (1.05) above which the test is considered to have failed for that estimate.

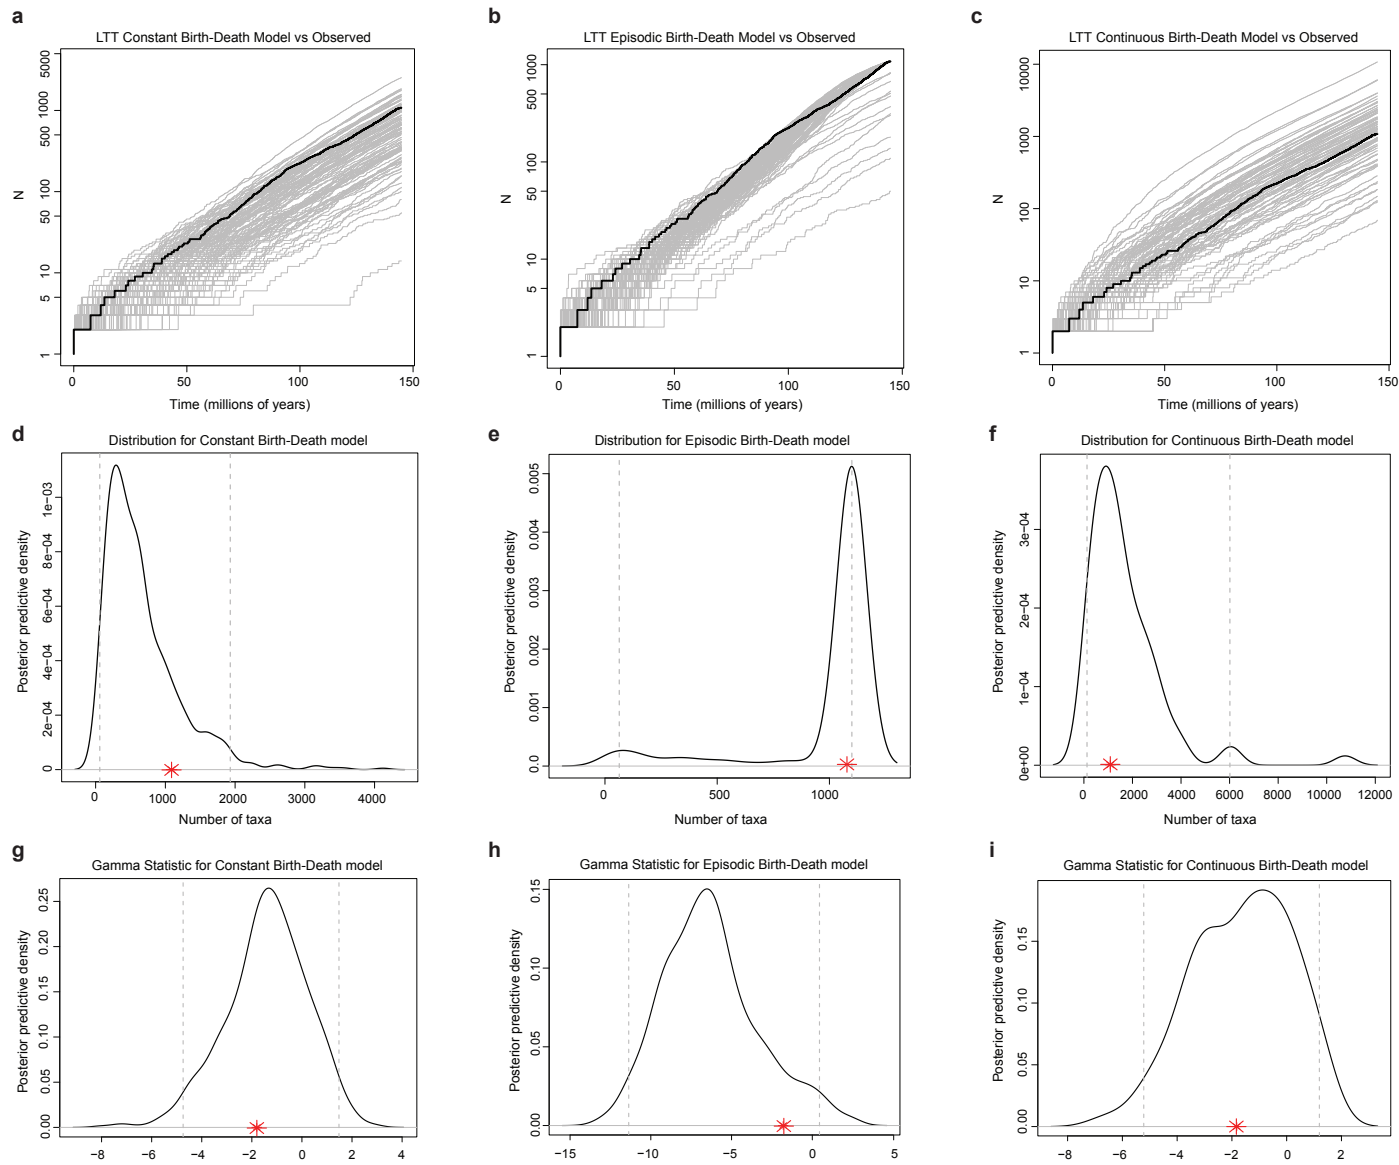

**Supplementary Fig. 28: Assessment of the absolute fit of three candidate birth-death (BD) models to the time-calibrated phylogeny of Acanthomorpha.**

Figures **a-c** compare lineage-through-time (LTT) curves for simulated trees under a given model (grey lines) to the LTT curve observed for the acanthomorph phylogeny (black line). Figures **d-e** plot the posterior-predictive distributions for the total number of species estimated to exist in the tree under each model. Dashed lines represent the 95% credible interval for the distribution and red asterisks indicate the total number of acanthomorph species (1,075) in the empirical dataset. Figures **g-i** plot the posterior-predictive distributions for the gamma statistic. Dashed lines represent the 95% credible interval for the distribution and red asterisks indicate the value of the gamma statistic empirically calculated for the acanthomorph phylogeny. Candidate models include: 1.) a constant rate birth-death model, 2.) an episodic birth-death model with a rate shift 50 Mya and 3.) a birth-death model with decreasing speciation rates through time. All three candidate models assume uniform (random) incomplete taxon sampling.



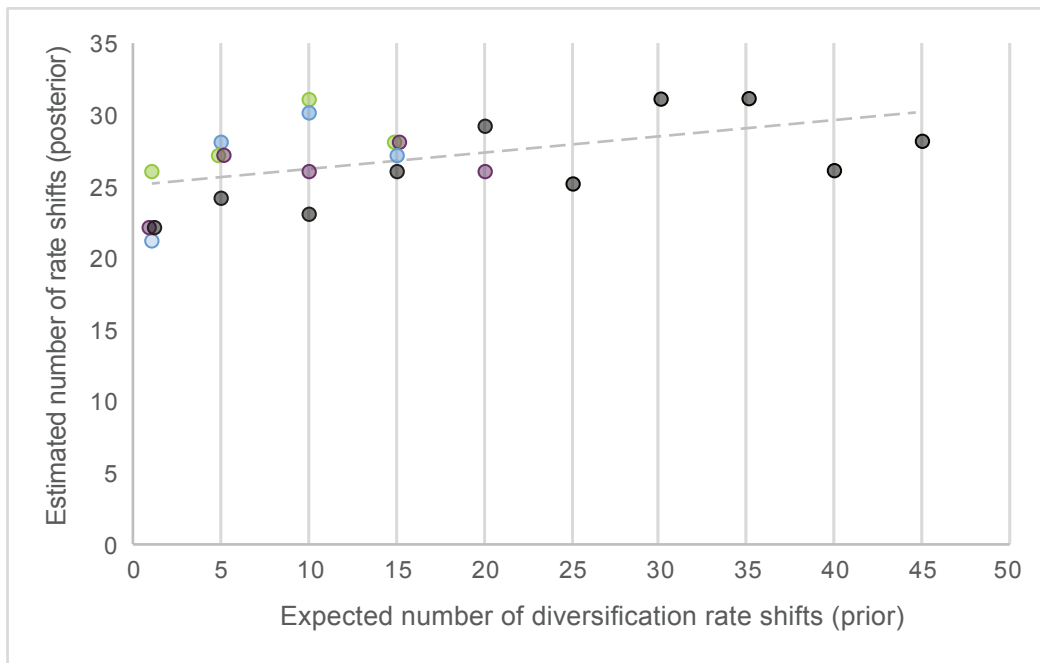

**Supplementary Fig. 29: The posterior number of shifts in speciation rates inferred in BAMM is weakly predicted by the prior.**

Our BAMM analyses used varying numbers of expected speciation rate shifts, and so the resulting maximum shift credibility (MSC) configurations displayed different numbers of estimated rate shifts, shown here as a scatterplot. The slope of the dashed, regression line (0.1049) suggests that changing the inputted prior parameter does not greatly affect the posterior prediction ( $y = 0.1049x + 25.063$ ; R-squared= 0.217). The standard error of the prior coefficient is 0.0436 and of the intercept is 0.8393. This correlation analysis was performed using base R functions. Colors of data points correspond to the settings used when running Markov Chain Monte Carlo (MCMC) simulations in BAMM: black corresponds to 4 MCMC chains in the analysis with a deltaT of 0.05, purple corresponds to 4 MCMC chains in the analysis with a deltaT of 0.1, blue corresponds to 2 MCMC chains in the analysis with a deltaT of 0.05, and green corresponds to 2 MCMC chains in the analysis with a deltaT of 0.1.

**Supplementary Table 1: Binomial names and higher taxonomic classification of species included in the phylogeny, institutional voucher information for specimens (if applicable), and NCBI SRA BioSample accession numbers.** The sixth column (‘Morphology Analyses’) denotes whether species were included in the body shape analyses, and the seventh column (‘Concordance Analyses’) denotes if samples were included in the BUCKy concordance factor analyses. NCBI BioSample numbers denoted with an asterisk (\*) indicate samples for which UCE data were extracted from whole genome sequence data.

| Order            | Higher Taxa (Family or Genus) | Species Name                      | Voucher ID                               | NCBI BioSample | Morphology Analyses | Concordance Analyses |
|------------------|-------------------------------|-----------------------------------|------------------------------------------|----------------|---------------------|----------------------|
| Aulopiformes     | Alepisauridae                 | <i>Alepisaurus ferox</i>          | YPM ICH 25657                            | SAMN05915027   | ✓                   |                      |
| Aulopiformes     | Paralepididae                 | <i>Notolepis coatsi</i>           | YPM ICH 022576                           | SAMN22936233   | ✓                   |                      |
| Myctophiformes   | Myctophidae                   | <i>Benthoosema glaciale</i>       | See NCBI SRA                             | SAMEA4028768*  | ✓                   |                      |
| Myctophiformes   | Myctophidae                   | <i>Ceratoscopelus warmingii</i>   | SIO 0510-09-28                           | SAMN05915048   | ✓                   |                      |
| Myctophiformes   | Myctophidae                   | <i>Dasyscopelus selenops</i>      | YPM ICH 25697                            | SAMN22936213   | ✓                   | ✓                    |
| Myctophiformes   | Myctophidae                   | <i>Notoscopelus caudispinosus</i> | YPM ICH 028430                           | SAMN22936234   | ✓                   |                      |
| Myctophiformes   | Neoscopelidae                 | <i>Neoscopelus macrolepidotus</i> | ASIZP 0913636                            | SAMN22936223   | ✓                   |                      |
| Myctophiformes   | Neoscopelidae                 | <i>Neoscopelus microchir</i>      | ASIZO 0910701                            | SAMN22936223   | ✓                   | ✓                    |
| Myctophiformes   | Neoscopelidae                 | <i>Scopelengys tristis</i>        | UW 115136                                | SAMN22936364   | ✓                   |                      |
| Lampriformes     | <i>Lampris</i>                | <i>Lampris guttatus</i>           | SIO 04-195                               | SAMN05915079   | ✓                   | ✓                    |
| Lampriformes     | Regalecidae                   | <i>Regalecus glesne</i>           | YPM ICH 26237                            | SAMN05915116   |                     |                      |
| Lampriformes     | Trachipteridae                | <i>Zu elongatus</i>               | NMNZ P.042029/TS3                        | SAMN05915140   | ✓                   | ✓                    |
| Polymixiiformes  | <i>Polymixia</i>              | <i>Polymixia lowei</i>            | YPM ICH 025498                           | SAMN05915104   | ✓                   | ✓                    |
| Percopsiformes   |                               | <i>Aphredoderus sayanus</i>       | YPM ICH 25183                            | SAMN05915031   | ✓                   | ✓                    |
| Percopsiformes   | Amblyopsidae                  | <i>Typhlichthys subterraneus</i>  | See NCBI SRA                             | SAMEA4028771*  | ✓                   |                      |
| Percopsiformes   | Percopsidae                   | <i>Percopsis omiscomycus</i>      | YPM ICH 017307                           | SAMN05915097   |                     | ✓                    |
| Percopsiformes   | Percopsidae                   | <i>Percopsis transmontana</i>     | See NCBI SRA                             | SAMEA4028770*  |                     |                      |
| Zeiformes        | Parazenidae                   | <i>Cyttopsis rosea</i>            | See NCBI SRA<br>KUIT 2929, MCZ<br>155779 | SAMEA4028773*  | ✓                   | ✓                    |
| Zeiformes        | Zeidae                        | <i>Zenopsis conchifera</i>        |                                          | SAMN05915138   | ✓                   |                      |
| Zeiformes        | Zeidae                        | <i>Zeus faber</i>                 | NSMT 62233                               | SAMN05915139   | ✓                   | ✓                    |
| Stylephoriformes |                               | <i>Stylephorus chordatus</i>      | YPM ICH 25672                            | SAMN05915127   | ✓                   | ✓                    |
| Gadiformes       | <i>Bregmaceros</i>            | <i>Bregmaceros cantori</i>        | See NCBI SRA                             | SAMEA4028775*  | ✓                   | ✓                    |
| Gadiformes       | <i>Melanonus</i>              | <i>Melanonus zugmayeri</i>        | See NCBI SRA                             | SAMEA4028779*  | ✓                   |                      |
| Gadiformes       | Muraenolepididae              | <i>Muraenolepis marmoratus</i>    | See NCBI SRA                             | SAMEA4028780*  |                     |                      |
| Gadiformes       | Trachyrincidae                | <i>Trachyrincus murrayi</i>       | See NCBI SRA                             | SAMEA4028782*  |                     |                      |
| Gadiformes       | Trachyrincidae                | <i>Trachyrincus scabrurus</i>     | See NCBI SRA                             | SAMEA4028781*  |                     |                      |
| Gadiformes       | Moridae                       | <i>Laemonema laureysi</i>         | See NCBI SRA                             | SAMEA4028784*  | ✓                   |                      |
| Gadiformes       | Moridae                       | <i>Mora moro</i>                  | See NCBI SRA                             | SAMEA4028783*  | ✓                   |                      |
| Gadiformes       | Macrouridae                   | <i>Bathygadus melanobranchus</i>  | See NCBI SRA                             | SAMEA4028785*  | ✓                   |                      |
| Gadiformes       | Macrouridae                   | <i>Coryphaenoides rupestris</i>   | YPM ICH 025367                           | SAMN05915057   | ✓                   |                      |

|                    |                     |                                        |                                            |                 |     |
|--------------------|---------------------|----------------------------------------|--------------------------------------------|-----------------|-----|
| Gadiformes         | Macrouridae         | <i>Coryphaenoides rupestris</i>        | See NCBI SRA                               | SAMN08010939*   |     |
| Gadiformes         | Macrouridae         | <i>Macrourus berglax</i>               | See NCBI SRA                               | SAMEA4028786*   | ✓   |
| Gadiformes         | Macrouridae         | <i>Malacocephalus occidentalis</i>     | See NCBI SRA                               | SAMEA4028787*   | ✓   |
| Gadiformes         | Merlucciidae        | <i>Merluccius capensis</i>             | See NCBI SRA                               | SAMEA4028778*   |     |
| Gadiformes         | Merlucciidae        | <i>Merluccius merluccius</i>           | See NCBI SRA                               | SAMEA4028777*   | ✓   |
| Gadiformes         | Phycidae            | <i>Lotella phycis</i>                  | See NCBI SRA                               | SAMEA4028789*   |     |
| Gadiformes         | Phycidae            | <i>Phycis blennoides</i>               | See NCBI SRA                               | SAMEA4028788*   | ✓   |
| Gadiformes         |                     | <i>Lota lota</i>                       | See NCBI SRA                               | SAMEA4028790*   | ✓   |
| Gadiformes         | Lotidae             | <i>Brosme brosme</i>                   | See NCBI SRA                               | SAMEA4028792*   | ✓   |
| Gadiformes         | Lotidae             | <i>Molva molva</i>                     | See NCBI SRA                               | SAMEA4028791*   | ✓   |
| Gadiformes         | Gadidae             | <i>Arctogadus glacialis</i>            | See NCBI SRA                               | SAMEA4028798*   |     |
| Gadiformes         | Gadidae             | <i>Boreogadus saida</i>                | See NCBI SRA                               | SAMEA4028799*   | ✓   |
| Gadiformes         | Gadidae             | <i>Gadiculus argenteus</i>             | See NCBI SRA                               | SAMEA4028794*   | ✓   |
| Gadiformes         | Gadidae             | <i>Gadus chalcogrammus</i>             | See NCBI SRA                               | SAMEA4028800*   |     |
| Gadiformes         | Gadidae             | <i>Gadus morhua</i>                    | YPM ICH 020859                             | SAMN05915065    | ✓ ✓ |
| Gadiformes         | Gadidae             | <i>Gadus morhua</i>                    | See NCBI SRA                               | SAMEA4028801*   |     |
| Gadiformes         | Gadidae             | <i>Melanogrammus aeglefinus</i>        | See NCBI SRA                               | SAMEA104602249* | ✓   |
| Gadiformes         | Gadidae             | <i>Merlangius merlangus</i>            | See NCBI SRA                               | SAMEA4028797*   | ✓   |
| Gadiformes         | Gadidae             | <i>Pollachius virens</i>               | See NCBI SRA                               | SAMEA4028795*   | ✓   |
| Gadiformes         | Gadidae             | <i>Trisopterus minutus</i>             | See NCBI SRA                               | SAMEA4028793*   | ✓   |
| Trachichthyiformes | Diretmidae          | <i>Diretmoides pauciradiatus</i>       | YPM ICH 028266<br>Pers. Coll.: N. Merrett, | SAMN22936030    | ✓   |
| Trachichthyiformes | Diretmidae          | <i>Diretmus argenteus</i>              | "JMS"                                      | SAMN22936031    | ✓   |
| Trachichthyiformes | Anomalopidae        | <i>Anomalops katoptron</i>             | YPM ICH 020676                             | SAMN22935859    |     |
| Trachichthyiformes | Monocentridae       | <i>Monocentris japonica</i>            | YFTC 13715                                 | SAMN22936203    | ✓   |
| Trachichthyiformes | <i>Anoplogaster</i> | <i>Anoplogaster cornuta</i>            | YPM ICH 025640                             | SAMN05915028    | ✓ ✓ |
| Trachichthyiformes | Trachichthyidae     | <i>Aulotrachichthys prosthemiis</i>    | ASIZD 0910678                              | SAMN22935879    |     |
| Trachichthyiformes | Trachichthyidae     | <i>Hoplostethus occidentalis</i>       | YFTC 14563, n.v.                           | SAMN22936107    | ✓   |
| Trachichthyiformes | Trachichthyidae     | <i>Paratrachichthys sajademalensis</i> | YFTC 14534, n.v.                           | SAMN22935880    |     |
| Beryciformes       | Holocentridae       | <i>Holocentrus rufus</i>               | See NCBI SRA                               | SAMEA4028806*   | ✓ ✓ |
| Beryciformes       | Holocentridae       | <i>Myripristis jacobus</i>             | See NCBI SRA                               | SAMEA4028805*   | ✓   |
| Beryciformes       | Holocentridae       | <i>Myripristis leiognathus</i>         | Pers. Coll.: M.Alfaro,<br>Alfaro 875       | SAMN05915086    | ✓   |
| Beryciformes       | Holocentridae       | <i>Myripristis violacea</i>            | Pers. Coll.:<br>P.Wainwright, PW2260B      | SAMN05915087    | ✓ ✓ |
| Beryciformes       | Holocentridae       | <i>Neoniphon sammara</i>               | See NCBI SRA                               | SAMEA4028807*   | ✓   |
| Beryciformes       | Holocentridae       | <i>Sargocentron coruscum</i>           | YPM ICH 23957                              | SAMN05915119    | ✓   |
| Beryciformes       | Berycidae           | <i>Beryx decadactylus</i>              | YFTC 13731, n.v.                           | SAMN22935898    | ✓   |
| Beryciformes       | Berycidae           | <i>Beryx splendens</i>                 | See NCBI SRA                               | SAMEA4028808*   | ✓   |
| Beryciformes       | Berycidae           | <i>Centroberyx druzhinini</i>          | ASIZD 0911026                              | SAMN22935940    | ✓   |
| Beryciformes       | Melamphaidae        | <i>Melamphaes longivelis</i>           | YPM ICH 028501                             | SAMN22936191    | ✓   |
| Beryciformes       | Melamphaidae        | <i>Poromitra gibbsi</i>                | YPM ICH 028486                             | SAMN22936312    | ✓   |

|               |                   |                                      |                                     |               |   |   |
|---------------|-------------------|--------------------------------------|-------------------------------------|---------------|---|---|
| Beryciformes  | Melamphaidae      | <i>Scopelogadus beanii</i>           | YPM ICH 028434                      | SAMN22936365  | ✓ |   |
| Beryciformes  | <i>Rondeletia</i> | <i>Rondeletia bicolor</i>            | YPM ICH 027515                      | SAMN22936342  | ✓ |   |
| Beryciformes  | <i>Rondeletia</i> | <i>Rondeletia loricata</i>           | YPM ICH 25674                       | SAMN05915117  | ✓ |   |
| Beryciformes  | Cetomimidae       | <i>Ataxolepis apus</i>               | YPM ICH 025531                      | SAMN22935874  |   |   |
| Beryciformes  | Cetomimidae       | <i>Cetostoma regani</i>              | YPM ICH 028287                      | SAMN22935948  | ✓ |   |
| Beryciformes  | Cetomimidae       | <i>Ditropichthys storeri</i>         | YPM ICH 028280                      | SAMN22936032  | ✓ |   |
| Beryciformes  | Cetomimidae       | <i>Mirapinna esau</i>                | YFTC 26026, n.v.                    | SAMN22936319  |   |   |
| Beryciformes  |                   | <i>Barbourisia rufa</i>              | YPM ICH 010068                      | SAMN22935887  | ✓ | ✓ |
| Beryciformes  | Stephanoberycidae | <i>Acanthochaenus luetkenii</i>      | YFTC 24122, n.v.                    | SAMN22935827  | ✓ |   |
| Beryciformes  | Stephanoberycidae | <i>Acanthochaenus luetkenii</i>      | YFTC 24124, n.v.                    | SAMN22935828  |   |   |
| Beryciformes  | Stephanoberycidae | <i>Malacosarcus macrostoma</i>       | USNM 400019                         | SAMN22936184  |   |   |
| Ophidiiformes | Dinematichthyidae | <i>Diancistrus jeffjohnsoni</i>      | YFTC 32439, n.v.<br>KUIT 674, USNM  | SAMN22936017  | ✓ |   |
| Ophidiiformes | Dinematichthyidae | <i>Dinematichthys iluocoeteoides</i> | 334123<br>KUIT 676, USNM            | SAMN22936025  |   | ✓ |
| Ophidiiformes | Dinematichthyidae | <i>Diancistrus tongaensis</i>        | 374200                              | SAMN22936018  | ✓ |   |
| Ophidiiformes | Dinematichthyidae | <i>Ogilbia cayorum</i>               | ZMUC P771463<br>KUIT 168, USNM      | SAMN22936237  |   |   |
| Ophidiiformes | Dinematichthyidae | <i>Ogilbichthys</i> sp.              | 349073                              | SAMN22936238  |   |   |
| Ophidiiformes | Dinematichthyidae | <i>Typhliasina pearsei</i>           | ZMUC P771455                        | SAMN22936435  |   |   |
| Ophidiiformes | Bythitidae        | <i>Aphyonus gelatinosus</i>          | ZMUB/MAR 3880                       | SAMN22935862  |   |   |
| Ophidiiformes | Bythitidae        | <i>Bidenichthys capensis</i>         | KUIT 6466, n.v.<br>KUIT 3292, SAIAB | SAMN22935903  |   |   |
| Ophidiiformes | Bythitidae        | <i>Brosmophyciops pautzkei</i>       | 86260                               | SAMN22935916  |   |   |
| Ophidiiformes | Bythitidae        | <i>Cataetyx messieri</i>             | ZMUC P771617<br>KUIT 3292, MCZ      | SAMN22935935  | ✓ |   |
| Ophidiiformes | Bythitidae        | <i>Diplacanthopoma brachysoma</i>    | 155341                              | SAMN22936028  |   |   |
| Ophidiiformes | Bythitidae        | <i>Megacataetyx niki</i>             | NMNZ P.41257                        | SAMN22935936  |   |   |
| Ophidiiformes | Bythitidae        | <i>Parabrotula tanseimaru</i>        | CBM 10557                           | SAMN18716611* |   |   |
| Ophidiiformes | Ophidiidae        | <i>Acanthonus armatus</i>            | MNHN 2004-1311                      | SAMN22935831  |   |   |
| Ophidiiformes | Ophidiidae        | <i>Apagesoma australe</i>            | ZMUC P771525                        | SAMN22935861  |   |   |
| Ophidiiformes | Ophidiidae        | <i>Bassogigas walkeri</i>            | SIO 08-109                          | SAMN22935888  |   | ✓ |
| Ophidiiformes | Ophidiidae        | <i>Brotula barbata</i>               | See NCBI SRA                        | SAMEA4028811* | ✓ |   |
| Ophidiiformes | Ophidiidae        | <i>Carapus acus</i>                  | See NCBI SRA                        | SAMEA4028813* |   |   |
| Ophidiiformes | Ophidiidae        | <i>Carapus bermudensis</i>           | KUIT 1172, KUI 27038                | SAMN05915045  |   |   |
| Ophidiiformes | Ophidiidae        | <i>Chilara taylori</i>               | KUIT 2201, KUI 28277                | SAMN22935972  | ✓ |   |
| Ophidiiformes | Ophidiidae        | <i>Dannevigia tusca</i>              | YFTC 32428, n.v.<br>KUIT 3677, MCZ  | SAMN22936013  |   |   |
| Ophidiiformes | Ophidiidae        | <i>Dicrolene intronigra</i>          | 158834                              | SAMN22936024  | ✓ |   |
| Ophidiiformes | Ophidiidae        | <i>Holcomycteronus brucei</i>        | ZMUC P771528                        | SAMN22936103  |   |   |
| Ophidiiformes | Ophidiidae        | <i>Lamprogrammus exutus</i>          | See NCBI SRA                        | SAMEA4028812* | ✓ |   |
| Ophidiiformes | Ophidiidae        | <i>Lepophidium profundorum</i>       | KUIT 1571, KUI 27197                | SAMN22936140  | ✓ |   |
| Ophidiiformes | Ophidiidae        | <i>Monomitopus garmani</i>           | ZMUC P771573                        | SAMN22936206  |   |   |
| Ophidiiformes | Ophidiidae        | <i>Porogadus miles</i>               | ZMUB/MAR 2661                       | SAMN22936311  |   |   |

|                   |                    |                                       |                                                       |               |   |   |
|-------------------|--------------------|---------------------------------------|-------------------------------------------------------|---------------|---|---|
| Ophidiiformes     | Ophidiidae         | <i>Ventichthys biospeedoi</i>         | MNHN 2004-2038                                        | SAMN22936438  |   |   |
| Batrachoidiformes | Batrachoididae     | <i>Batrachoides pacifici</i>          | See NCBI SRA                                          | SAMN05915038  |   |   |
| Batrachoidiformes | Batrachoididae     | <i>Chatrabus melanurus</i>            | See NCBI SRA                                          | SAMEA4028814* | ✓ |   |
| Batrachoidiformes | Batrachoididae     | <i>Halobatrachus didactylus</i>       | YFTC 17238, n.v.                                      | SAMN22936085  | ✓ | ✓ |
| Batrachoidiformes | Batrachoididae     | <i>Opsanus tau</i>                    | YPM ICH 24156<br>Pers. Coll.:<br>P.Wainwright, PW267: | SAMN22936248  | ✓ | ✓ |
| Batrachoidiformes | Batrachoididae     | <i>Porichthys notatus</i>             | B50                                                   | SAMN22936309  | ✓ |   |
| Gobiiformes       | <i>Kurtus</i>      | <i>Kurtus gulliveri</i>               | TMB 09-2                                              | SAMN05915077  | ✓ | ✓ |
| Gobiiformes       | <i>Kurtus</i>      | <i>Kurtus indicus</i>                 | AMNH 251591                                           | SAMN22936124  |   |   |
| Gobiiformes       | Apogonidae         | <i>Astrapogon stellatus</i>           | YPM ICH 021834<br>Pers. Coll.:                        | SAMN22935872  | ✓ |   |
| Gobiiformes       | Apogonidae         | <i>Cheilodipterus quinquelineatus</i> | P.Wainwright, PW1704B<br>Pers. Coll.:                 | SAMN22935969  | ✓ |   |
| Gobiiformes       | Apogonidae         | <i>Fibramia lateralis</i>             | P.Wainwright, PW2294B                                 | SAMN05915032  |   |   |
| Gobiiformes       | Apogonidae         | <i>Ostorhinchus doederleini</i>       | LACM 000974                                           | SAMN22568987  |   | ✓ |
| Gobiiformes       | Apogonidae         | <i>Ostorhinchus nigrofasciatus</i>    | LACM-T 000970<br>Pers. Coll: M. Alfaro,<br>MEA        | SAMN05915092  | ✓ |   |
| Gobiiformes       | Apogonidae         | <i>Paroncheilus affinis</i>           | LACM-T 000493                                         | SAMN05915099  | ✓ |   |
| Gobiiformes       | Apogonidae         | <i>Phaeoptyx pigmentaria</i>          | YPM ICH 026618                                        | SAMN22936317  | ✓ |   |
| Gobiiformes       | Apogonidae         | <i>Pseudamia gelatinosa</i>           | n.v.                                                  | SAMN22569001  | ✓ | ✓ |
| Gobiiformes       | Apogonidae         | <i>Taeniamia biguttata</i>            | LACM 000975                                           | SAMN22568902  |   |   |
| Gobiiformes       | <i>Trichonotus</i> | <i>Trichonotus filamentosus</i>       | LSUMZ 14120                                           | SAMN22936425  | ✓ | ✓ |
| Gobiiformes       | Rhyacichthyidae    | <i>Rhyacichthys aspro</i>             | NSMT-P 97135                                          | SAMN22936341  |   |   |
| Gobiiformes       | Odontobutidae      | <i>Odontobutis obscura</i>            | See NCBI SRA                                          | SAMN05915089  | ✓ | ✓ |
| Gobiiformes       | Odontobutidae      | <i>Sineleotris saccharae</i>          | LACM-T, n.v.                                          | SAMN22569008  |   |   |
| Gobiiformes       | Milyeringidae      | <i>Milyeringa veritas</i>             | SAMA, n.v.                                            | SAMN22568978  |   |   |
| Gobiiformes       | Milyeringidae      | <i>Typhleotris madagascariensis</i>   | FMNH 116498                                           | SAMN22569011  |   |   |
| Gobiiformes       | Eleotridae         | <i>Dormitator maculatus</i>           | LACM 000017                                           | SAMN22568918  | ✓ |   |
| Gobiiformes       | Eleotridae         | <i>Eleotris pisonis</i>               | LACM 000019                                           | SAMN22568924  | ✓ |   |
| Gobiiformes       | Eleotridae         | <i>Erotelis smaragdus</i>             | LACM-T 000042                                         | SAMN05915063  | ✓ |   |
| Gobiiformes       | Eleotridae         | <i>Gobiomorphus hubbsi</i>            | LACM-T, n.v.                                          | SAMN15908306  | ✓ |   |
| Gobiiformes       | Eleotridae         | <i>Gobiomorus dormitor</i>            | NCSM 068278                                           | SAMN22568929  | ✓ |   |
| Gobiiformes       | Eleotridae         | <i>Guavina micropus</i>               | Pers. Coll.: VanTass/Rob                              | SAMN22568932  | ✓ |   |
| Gobiiformes       | Eleotridae         | <i>Hemieleotris latifasciata</i>      | LACM 000018                                           | SAMN22568933  | ✓ |   |
| Gobiiformes       | Eleotridae         | <i>Hypseleotris compressa</i>         | LACM 000104                                           | SAMN15908312  | ✓ |   |
| Gobiiformes       | Eleotridae         | <i>Microphilypnus ternetzi</i>        | ANSP 180643                                           | SAMN22568977  |   |   |
| Gobiiformes       | Eleotridae         | <i>Mogurnda adspersa</i>              | LACM-T 000069                                         | SAMN05915085  | ✓ |   |
| Gobiiformes       | Eleotridae         | <i>Ratsirakia legendrei</i>           | LACM 000007                                           | SAMN22569003  |   |   |
| Gobiiformes       | Eleotridae         | <i>Tateurndina ocellicauda</i>        | LACM 000066                                           | SAMN22569010  | ✓ |   |
| Gobiiformes       | Butidae            | <i>Butis butis</i>                    | LACM 000045                                           | SAMN22568909  |   |   |
| Gobiiformes       | Butidae            | <i>Kribia nana</i>                    | LACM 000077                                           | SAMN22568971  | ✓ |   |

|             |                     |                                      |               |               |   |
|-------------|---------------------|--------------------------------------|---------------|---------------|---|
| Gobiiformes | Butidae             | <i>Ophiocara porocephala</i>         | LACM-T 000001 | SAMN05915091  |   |
| Gobiiformes | Butidae             | <i>Oxyeleotris lineolata</i>         | LACM-T 000021 | SAMN22936255  | ✓ |
| Gobiiformes | Butidae             | <i>Oxyeleotris nullipora</i>         | LACM-T 000596 | SAMN22568992  |   |
| Gobiiformes | Butidae             | <i>Oxyeleotris selheimi</i>          | LACM-T 000006 | SAMN22568993  | ✓ |
| Gobiiformes | Thalasseleotrididae | <i>Grahamichthys radiata</i>         | YPM ICH 26585 | SAMN22936082  | ✓ |
| Gobiiformes | Thalasseleotrididae | <i>Thalasseleotris iota</i>          | YPM ICH 26584 | SAMN22936412  |   |
| Gobiiformes | Oxudercidae         | <i>Acanthogobius flavimanus</i>      | LACM-T 000295 | SAMN22568897  | ✓ |
| Gobiiformes | Oxudercidae         | <i>Boleophthalmus pectinirostris</i> | See NCBI SRA  | SAMN03201692* | ✓ |
| Gobiiformes | Oxudercidae         | <i>Evorthodus minutus</i>            | LACM-T 000265 | SAMN05915064  | ✓ |
| Gobiiformes | Oxudercidae         | <i>Gillichthys seta</i>              | LACM-T 000281 | SAMN05915066  | ✓ |
| Gobiiformes | Oxudercidae         | <i>Gnatholepis cauerensis</i>        | LACM 001122   | SAMN22568926  | ✓ |
| Gobiiformes | Oxudercidae         | <i>Gobiopterus semivestitus</i>      | LACM 000090   | SAMN22568930  |   |
| Gobiiformes | Oxudercidae         | <i>Mugilogobius rivulus</i>          | LACM 000262   | SAMN22568983  | ✓ |
| Gobiiformes | Oxudercidae         | <i>Pandaka lidwilli</i>              | LACM 000254   | SAMN22568994  |   |
| Gobiiformes | Oxudercidae         | <i>Periophthalmodon schlosseri</i>   | See NCBI SRA  | SAMN03201695* |   |
| Gobiiformes | Oxudercidae         | <i>Periophthalmus barbarus</i>       | LACM-T 000273 | SAMN05915098  | ✓ |
| Gobiiformes | Oxudercidae         | <i>Periophthalmus magnuspinnatus</i> | See NCBI SRA  | SAMN03201694* |   |
| Gobiiformes | Oxudercidae         | <i>Scartelaos histophorus</i>        | See NCBI SRA  | SAMN03201693* | ✓ |
| Gobiiformes | Oxudercidae         | <i>Typhlogobius californiensis</i>   | LACM 000025   | SAMN22569012  | ✓ |
| Gobiiformes | Gobiidae            | <i>Amblyeleotris guttata</i>         | LACM 001025   | SAMN22568899  | ✓ |
| Gobiiformes | Gobiidae            | <i>Amblygobius phalaena</i>          | LACM 000195   | SAMN22568900  | ✓ |
| Gobiiformes | Gobiidae            | <i>Asterropteryx ensifera</i>        | LACM 001050   | SAMN22568903  | ✓ |
| Gobiiformes | Gobiidae            | <i>Bathygobius soporator</i>         | LACM-T 000511 | SAMN05915037  | ✓ |
| Gobiiformes | Gobiidae            | <i>Bryaninops yongei</i>             | LACM 000164   | SAMN22568907  | ✓ |
| Gobiiformes | Gobiidae            | <i>Callogobius sclateri</i>          | LACM 000172   | SAMN22568911  | ✓ |
| Gobiiformes | Gobiidae            | <i>Coryogalops anomolus</i>          | LACM 000243   | SAMN22568914  |   |
| Gobiiformes | Gobiidae            | <i>Coryphopterus glaucofraenum</i>   | LACM 000578   | SAMN22568915  | ✓ |
| Gobiiformes | Gobiidae            | <i>Cryptocentrus cinctus</i>         | LACM 001086   | SAMN22568916  | ✓ |
| Gobiiformes | Gobiidae            | <i>Elacatinus oceanops</i>           | LACM 000230   | SAMN22568931  | ✓ |
| Gobiiformes | Gobiidae            | <i>Exyrias belissimus</i>            | LACM 000168   | SAMN22568924  | ✓ |
| Gobiiformes | Gobiidae            | <i>Glossogobius flavipinnis</i>      | LACM 000311   | SAMN22568925  | ✓ |
| Gobiiformes | Gobiidae            | <i>Gobiodon histrio</i>              | LACM 000239   | SAMN22568927  | ✓ |
| Gobiiformes | Gobiidae            | <i>Istigobius rigilius</i>           | LACM 001078   | SAMN22568968  | ✓ |
| Gobiiformes | Gobiidae            | <i>Koumansetta rainfordi</i>         | n.v.          | SAMN22568969  |   |
| Gobiiformes | Gobiidae            | <i>Lesueurigobius sanzi</i>          | See NCBI SRA  | SAMEA4028816* | ✓ |
| Gobiiformes | Gobiidae            | <i>Lythrypnus dalli</i>              | LACM 000190   | SAMN22568974  | ✓ |
| Gobiiformes | Gobiidae            | <i>Microdesmus longipinnis</i>       | LACM 000617   | SAMN22568975  |   |
| Gobiiformes | Gobiidae            | <i>Nes longus</i>                    | LACM 000222   | SAMN22568985  | ✓ |
| Gobiiformes | Gobiidae            | <i>Priolepis cincta</i>              | LACM 000904   | SAMN22568999  | ✓ |

|               |                 |                                       |                                       |                |   |   |
|---------------|-----------------|---------------------------------------|---------------------------------------|----------------|---|---|
| Gobiiformes   | Gobiidae        | <i>Ptereleotris evides</i>            | Pers. Coll.:<br>P.Wainwright, PW2064B | SAMN05915113   | ✓ | ✓ |
| Gobiiformes   | Gobiidae        | <i>Ptereleotris zebra</i>             | LACM 000594                           | SAMN22569002   | ✓ |   |
| Gobiiformes   | Gobiidae        | <i>Stonogobiops xanthorhinica</i>     | LACM 001049                           | SAMN22569009   |   |   |
| Gobiiformes   | Gobiidae        | <i>Valenciennea strigata</i>          | LACM-T 000898                         | SAMN05915136   | ✓ |   |
| Scombriformes | <i>Arripis</i>  | <i>Arripis trutta</i>                 | FAKU 82391                            | SAMN13222433   | ✓ | ✓ |
| Scombriformes | <i>Ariomma</i>  | <i>Ariomma bondi</i>                  | YPM ICH 025637                        | SAMN13222429   | ✓ |   |
| Scombriformes | <i>Ariomma</i>  | <i>Ariomma indica</i>                 | NSMT 64808<br>KUIT 5304, MCZ          | SAMN13222430   | ✓ |   |
| Scombriformes | <i>Ariomma</i>  | <i>Ariomma melana</i>                 | 161902                                | SAMN13222431   | ✓ |   |
| Scombriformes | <i>Ariomma</i>  | <i>Ariomma</i> sp.                    | YPM ICH 027642                        | SAMN13222432   |   |   |
| Scombriformes | Nomeidae        | <i>Cubiceps whiteleggii</i>           | SNFR 14797                            | SAMN13222449   | ✓ |   |
| Scombriformes | Nomeidae        | <i>Cubiceps baxteri</i>               | SIO 98-26                             | SAMN13222448   | ✓ |   |
| Scombriformes | Nomeidae        | <i>Psenes cyanophrys</i>              | YPM ICH 025740                        | SAMN13222496   | ✓ |   |
| Scombriformes | Nomeidae        | <i>Psenes arafurensis</i>             | SNFR 14835                            | SAMN13222495   | ✓ |   |
| Scombriformes | Stromateidae    | <i>Pampus argenteus</i>               | LSUMZ 5282                            | SAMN13222483   | ✓ |   |
| Scombriformes | Stromateidae    | <i>Pampus chinensis</i>               | LSUMZ 5300                            | SAMN13222484   |   |   |
| Scombriformes | Stromateidae    | <i>Pampus echinogaster</i>            | KAUM 64926                            | SAMN13222485   |   |   |
| Scombriformes | Stromateidae    | <i>Pampus punctatissimus</i>          | CBM 12672                             | SAMN13222531   |   |   |
| Scombriformes | Stromateidae    | <i>Peprilus burti</i>                 | KUIT 5086, KUI 30083                  | SAMN13222490   | ✓ |   |
| Scombriformes | Stromateidae    | <i>Peprilus paru</i>                  | KUIT 5169, KUI 30096                  | SAMN13222489   | ✓ |   |
| Scombriformes | Stromateidae    | <i>Peprilus simillimus</i>            | KUIT 9394, KUI 23694                  | SAMN13222491   | ✓ |   |
| Scombriformes | Stromateidae    | <i>Peprilus triacanthus</i>           | YPM ICH 024677                        | SAMN13222492   |   |   |
| Scombriformes |                 | <i>Pomatomus saltatrix</i>            | Pers. Coll.:<br>P.Wainwright, PW1568  | SAMN05915106   | ✓ |   |
| Scombriformes | Centrolophidae  | <i>Hyperoglyphe antarctica</i>        | SNFR 16241                            | SAMN13222465   | ✓ |   |
| Scombriformes | Centrolophidae  | <i>Hyperoglyphe japonica</i>          | CBM 13628                             | SAMN13222466   | ✓ |   |
| Scombriformes | Centrolophidae  | <i>Psenopsis anomala</i>              | Miya-11-231                           | SAMN05915108   | ✓ |   |
| Scombriformes | Centrolophidae  | <i>Schedophilus velaini</i>           | SNFR 16403                            | SAMN13222508   | ✓ |   |
| Scombriformes | Icosteidae      | <i>Icosteus aenigmaticus</i>          | SIO 99-95                             | SAMN13222467   | ✓ |   |
| Scombriformes |                 | <i>Amarsipus carlsbergi</i>           | CBM 17750                             | SAMN10081044 * | ✓ |   |
| Scombriformes | Tetragonuridae  | <i>Tetragonurus atlanticus</i>        | YPM ICH 027663                        | SAMN13222521   | ✓ |   |
| Scombriformes | Tetragonuridae  | <i>Tetragonurus cuvieri</i>           | NSMT 65749                            | SAMN13222522   |   |   |
| Scombriformes | Tetragonuridae  | <i>Tetragonurus pacificus</i>         | SNFR 15336                            | SAMN13222523   |   |   |
| Scombriformes | Chiasmodontidae | <i>Chiasmodon niger</i>               | YPM ICH 25663                         | SAMN05915052   | ✓ |   |
| Scombriformes | Chiasmodontidae | <i>Dysalotus alcocki</i>              | YPM ICH 025665                        | SAMN13222451   | ✓ |   |
| Scombriformes | Chiasmodontidae | <i>Dysalotus oligoscolus</i>          | YPM ICH 025654                        | SAMN13222452   |   |   |
| Scombriformes | Chiasmodontidae | <i>Kali kerberti</i>                  | UW 115135                             | SAMN05915076   | ✓ |   |
| Scombriformes | Chiasmodontidae | <i>Kali macrodon</i>                  | YPM ICH 027772<br>KUIT 8140, MCZ      | SAMN13222468   | ✓ |   |
| Scombriformes | Chiasmodontidae | <i>Kali macrura</i>                   | 165931                                | SAMN13222469   |   |   |
| Scombriformes | Chiasmodontidae | <i>Pseudoscopelus altipinnis</i>      | YPM ICH 027632                        | SAMN13222498   |   |   |
| Scombriformes | Chiasmodontidae | <i>Pseudoscopelus astronesthicens</i> | KUIT 6518, MCZ<br>164170              | SAMN13222499   |   |   |

|               |                 |                                     |                                      |              |   |
|---------------|-----------------|-------------------------------------|--------------------------------------|--------------|---|
| Scombriformes | Chiasmodontidae | <i>Pseudoscopelus obtusifrons</i>   | YPM ICH 027787                       | SAMN13222501 |   |
| Scombriformes | Chiasmodontidae | <i>Pseudoscopelus odontoglossum</i> | YPM ICH 027854                       | SAMN13222500 |   |
| Scombriformes | Chiasmodontidae | <i>Pseudoscopelus scutatus</i>      | YPM ICH 025805                       | SAMN13222503 |   |
| Scombriformes | Scombridae      | <i>Acanthocybium solandri</i>       | KUIT 5425                            | SAMN13222425 | ✓ |
| Scombriformes | Scombridae      | <i>Auxis rochei</i>                 | CBM 14077                            | SAMN13222436 | ✓ |
| Scombriformes | Scombridae      | <i>Auxis thazard</i>                | CBM 12877                            | SAMN13222437 |   |
| Scombriformes | Scombridae      | <i>Euthynnus affinis</i>            | CBM 12671                            | SAMN13222455 | ✓ |
| Scombriformes | Scombridae      | <i>Gasterochisma melampus</i>       | NSMT 93197                           | SAMN13222462 |   |
| Scombriformes | Scombridae      | <i>Gymnosarda unicolor</i>          | NSMT 62530                           | SAMN13222464 | ✓ |
| Scombriformes | Scombridae      | <i>Katsuwonus pelamis</i>           | CBM 12672                            | SAMN13222471 | ✓ |
| Scombriformes | Scombridae      | <i>Rastrelliger kanagurta</i>       | NSMT 76071                           | SAMN13222505 | ✓ |
| Scombriformes | Scombridae      | <i>Scomber australasicus</i>        | CBM 12636                            | SAMN22936357 | ✓ |
| Scombriformes | Scombridae      | <i>Scomber japonicus</i>            | CBM 12641                            | SAMN13222509 | ✓ |
| Scombriformes | Scombridae      | <i>Scomber scombrus</i>             | YPM ICH 020681                       | SAMN05915123 | ✓ |
| Scombriformes | Scombridae      | <i>Scomberomorus maculatus</i>      | Pers. Coll.:<br>P.Wainwright, PW1207 | SAMN05915124 | ✓ |
| Scombriformes | Scombridae      | <i>Scomberomorus niphonius</i>      | CBM 14469                            | SAMN13222512 |   |
| Scombriformes | Scombridae      | <i>Scomberomorus regalis</i>        | KUIT 5159, KUI 30178                 | SAMN13222513 | ✓ |
| Scombriformes | Scombridae      | <i>Thunnus orientalis</i>           | NSMT-P 93077                         | SAMN13222524 | ✓ |
| Scombriformes | Scombridae      | <i>Thunnus tonggol</i>              | SNFR 16558                           | SAMN13222525 |   |
| Scombriformes | Caristiidae     | <i>Caristius macropus</i>           | UW 113533                            | SAMN13222445 |   |
| Scombriformes | Caristiidae     | <i>Paracaristius maderensis</i>     | YPM ICH 027617                       | SAMN13222486 |   |
| Scombriformes | Caristiidae     | <i>Paracaristius nudarcus</i>       | YPM ICH 25618                        | SAMN22936261 |   |
| Scombriformes | Bramidae        | <i>Brama caribbea</i>               | YPM ICH 025808                       | SAMN13222442 | ✓ |
| Scombriformes | Bramidae        | <i>Brama dussumieri</i>             | CBM 15373                            | SAMN13222443 | ✓ |
| Scombriformes | Bramidae        | <i>Brama japonica</i>               | SIO 01-183                           | SAMN05915040 | ✓ |
| Scombriformes | Bramidae        | <i>Eumegistus illustris</i>         | n.v. tissue only<br>KUIT 8137, MCZ   | SAMN13222454 |   |
| Scombriformes | Bramidae        | <i>Pterycombus brama</i>            | 165918                               | SAMN13222504 | ✓ |
| Scombriformes | Bramidae        | <i>Pterycombus petersii</i>         | OCF-P 20071225                       | SAMN13222532 | ✓ |
| Scombriformes | Bramidae        | <i>Taractes asper</i>               | SIO 00-165                           | SAMN05915132 |   |
| Scombriformes | Bramidae        | <i>Taractes rubescens</i>           | CBM 14224                            | SAMN13222517 |   |
| Scombriformes | Bramidae        | <i>Taractichthys longipinnis</i>    | KUIT 5403                            | SAMN13222518 |   |
| Scombriformes | Bramidae        | <i>Taractichthys steindachneri</i>  | CBM 14163                            | SAMN13222519 | ✓ |
| Scombriformes |                 | <i>Scombrolabrax heterolepis</i>    | NMNZ 40456                           | SAMN13222514 |   |
| Scombriformes |                 | <i>Lepidocybium flavobrunneum</i>   | CBM 12751                            | SAMN13222474 |   |
| Scombriformes | Gempylidae      | <i>Diplospinus multistriatus</i>    | YPM ICH 025671                       | SAMN13222450 | ✓ |
| Scombriformes | Gempylidae      | <i>Epinnula magistralis</i>         | NSMT 62524                           | SAMN13222453 |   |
| Scombriformes | Gempylidae      | <i>Gempylus serpens</i>             | NSMT 62526<br>KUIT 3543, MCZ         | SAMN13222463 | ✓ |
| Scombriformes | Gempylidae      | <i>Neoepinnula americana</i>        | 158587                               | SAMN13222480 | ✓ |
| Scombriformes | Gempylidae      | <i>Nesiarchus nasutus</i>           | NSMT 75668                           | SAMN13222481 | ✓ |



|                |                 |                                    |                                  |              |   |
|----------------|-----------------|------------------------------------|----------------------------------|--------------|---|
| Scombriformes  | Gempylidae      | <i>Paradiplospinus antarcticus</i> | KUIT 925, MCZ 131300             | SAMN13222487 | ✓ |
| Scombriformes  | Gempylidae      | <i>Paradiplospinus gracilis</i>    | YPM ICH 022377                   | SAMN13222488 |   |
| Scombriformes  | Gempylidae      | <i>Promethichthys prometheus</i>   | CBM 13627                        | SAMN13222494 | ✓ |
| Scombriformes  | Gempylidae      | <i>Rexea prometheoides</i>         | OCF-P 20140707-2                 | SAMN13222506 |   |
| Scombriformes  | Gempylidae      | <i>Ruvettus pretiosus</i>          | SIO 06-116                       | SAMN05915118 | ✓ |
| Scombriformes  | Gempylidae      | <i>Thyrsitoides marleyi</i>        | NSMT 73382                       | SAMN13222526 |   |
| Scombriformes  | Trichiuridae    | <i>Aphanopus carbo</i>             | HUMZ 220745                      | SAMN13222427 | ✓ |
| Scombriformes  | Trichiuridae    | <i>Assurger anzac</i>              | SIO 18126                        | SAMN05915034 |   |
| Scombriformes  | Trichiuridae    | <i>Benthodesmus elongatus</i>      | YPM ICH 025649<br>KUIT 3542, MCZ | SAMN13222438 | ✓ |
| Scombriformes  | Trichiuridae    | <i>Benthodesmus simonyi</i>        | 158586                           | SAMN13222439 | ✓ |
| Scombriformes  | Trichiuridae    | <i>Benthodesmus tenuis</i>         | HUMZ 220516                      | SAMN13222440 |   |
| Scombriformes  | Trichiuridae    | <i>Evoxymetopon macrophthalmus</i> | SNFR 14546                       | SAMN13222456 |   |
| Scombriformes  | Trichiuridae    | <i>Evoxymetopon poeyi</i>          | NSMT 77666<br>KUIT 5249, MCZ     | SAMN13222457 |   |
| Scombriformes  | Trichiuridae    | <i>Evoxymetopon taeniatus</i>      | 160934<br>KUIT 3546, MCZ         | SAMN13222458 | ✓ |
| Scombriformes  | Trichiuridae    | <i>Lepidopus altifrons</i>         | 158590                           | SAMN13222475 | ✓ |
| Scombriformes  | Trichiuridae    | <i>Lepidopus caudatus</i>          | KUIT 8084, n.v.                  | SAMN13222476 | ✓ |
| Scombriformes  | Trichiuridae    | <i>Lepturacanthus savala</i>       | LSUMZ 78                         | SAMN13222477 | ✓ |
| Scombriformes  | Trichiuridae    | <i>Tentoriceps cristatus</i>       | SNFR 17729                       | SAMN13222520 | ✓ |
| Scombriformes  | Trichiuridae    | <i>Trichiurus lepturus</i>         | CBM 12994                        | SAMN13222527 | ✓ |
| Scombriformes  | Trichiuridae    | <i>Trichiurus</i> sp. 1            | SNFR 17528                       | SAMN13222528 |   |
| Scombriformes  | Trichiuridae    | <i>Trichiurus</i> sp. 2            | SNFR 17533                       | SAMN13222529 |   |
| Sygnathiformes | Pegasidae       | <i>Eurypegus draconis</i>          | See NCBI SRA                     | SAMN06563069 |   |
| Sygnathiformes | Pegasidae       | <i>Pegasus volitans</i>            | See NCBI SRA                     | SAMN06563109 | ✓ |
| Sygnathiformes | Dactylopteridae | <i>Dactyloptena orientalis</i>     | See NCBI SRA                     | SAMN06563054 | ✓ |
| Sygnathiformes | Dactylopteridae | <i>Dactyloptena peterseni</i>      | See NCBI SRA                     | SAMN06563055 | ✓ |
| Sygnathiformes | Dactylopteridae | <i>Dactylopterus volitans</i>      | See NCBI SRA                     | SAMN06563056 | ✓ |
| Sygnathiformes | Mullidae        | <i>Mulloidichthys dentatus</i>     | See NCBI SRA                     | SAMN06563097 |   |
| Sygnathiformes | Mullidae        | <i>Mulloidichthys martinicus</i>   | See NCBI SRA                     | SAMN06563098 | ✓ |
| Sygnathiformes | Mullidae        | <i>Mulloidichthys vanicolensis</i> | See NCBI SRA                     | SAMN06563099 | ✓ |
| Sygnathiformes | Mullidae        | <i>Mullus auratus</i>              | See NCBI SRA                     | SAMN22936211 | ✓ |
| Sygnathiformes | Mullidae        | <i>Parupeneus barberinoides</i>    | See NCBI SRA                     | SAMN06563103 | ✓ |
| Sygnathiformes | Mullidae        | <i>Parupeneus barberinus</i>       | See NCBI SRA                     | SAMN22936275 | ✓ |
| Sygnathiformes | Mullidae        | <i>Parupeneus barberinus</i>       | See NCBI SRA                     | SAMN06563108 |   |
| Sygnathiformes | Mullidae        | <i>Parupeneus cyclostomus</i>      | See NCBI SRA                     | SAMN06563105 | ✓ |
| Sygnathiformes | Mullidae        | <i>Parupeneus multifasciatus</i>   | See NCBI SRA                     | SAMN06563106 | ✓ |
| Sygnathiformes | Mullidae        | <i>Parupeneus rubescens</i>        | See NCBI SRA                     | SAMN06563107 |   |
| Sygnathiformes | Mullidae        | <i>Pseudupeneus grandisquamis</i>  | See NCBI SRA                     | SAMN06563113 | ✓ |
| Sygnathiformes | Mullidae        | <i>Pseudupeneus maculatus</i>      | See NCBI SRA                     | SAMN06563112 | ✓ |
| Sygnathiformes | Mullidae        | <i>Upeneichthys lineatus</i>       | See NCBI SRA                     | SAMN06563144 | ✓ |

|                |                     |                                     |                                                          |              |   |   |
|----------------|---------------------|-------------------------------------|----------------------------------------------------------|--------------|---|---|
| Sygnathiformes | Mullidae            | <i>Upeneus tragula</i>              | See NCBI SRA<br>YFTC 25957; Pers.<br>Coll.: Eri Katayama | SAMN06563145 | ✓ |   |
| Sygnathiformes | Draconettidae       | <i>Draconetta xenica</i>            |                                                          | SAMN22936035 |   |   |
| Sygnathiformes | Callionymidae       | <i>Anaora tentaculata</i>           | See NCBI SRA                                             | SAMN06563036 |   |   |
| Sygnathiformes | Callionymidae       | <i>Callionymus belcheri</i>         | See NCBI SRA                                             | SAMN06563039 | ✓ | ✓ |
| Sygnathiformes | Callionymidae       | <i>Callionymus calcaratus</i>       | See NCBI SRA                                             | SAMN06563114 |   |   |
| Sygnathiformes | Callionymidae       | <i>Callionymus curvicornis</i>      | See NCBI SRA                                             | SAMN06563040 | ✓ |   |
| Sygnathiformes | Callionymidae       | <i>Callionymus delicatulus</i>      | See NCBI SRA                                             | SAMN06563041 | ✓ |   |
| Sygnathiformes | Callionymidae       | <i>Callionymus limiceps</i>         | See NCBI SRA                                             | SAMN06563042 | ✓ |   |
| Sygnathiformes | Callionymidae       | <i>Calliurichthys grossi</i>        | See NCBI SRA                                             | SAMN06563043 |   |   |
| Sygnathiformes | Callionymidae       | <i>Calliurichthys scaber</i>        | See NCBI SRA                                             | SAMN06563044 |   |   |
| Sygnathiformes | Callionymidae       | <i>Dactylopus dactylopus</i>        | See NCBI SRA                                             | SAMN06563057 | ✓ |   |
| Sygnathiformes | Callionymidae       | <i>Diplogrammus goramensis</i>      | See NCBI SRA                                             | SAMN06563058 | ✓ |   |
| Sygnathiformes | Callionymidae       | <i>Draculo mirabilis</i>            | See NCBI SRA                                             | SAMN06563066 |   |   |
| Sygnathiformes | Callionymidae       | <i>Repomucenus calcaratus</i>       | See NCBI SRA                                             | SAMN22936338 |   |   |
| Sygnathiformes | Callionymidae       | <i>Synchiropus agassizii</i>        | See NCBI SRA                                             | SAMN06563075 |   |   |
| Sygnathiformes | Callionymidae       | <i>Synchiropus ativelis</i>         | See NCBI SRA                                             | SAMN06563120 |   |   |
| Sygnathiformes | Callionymidae       | <i>Synchiropus atrilabiatus</i>     | See NCBI SRA                                             | SAMN06563121 | ✓ |   |
| Sygnathiformes | Callionymidae       | <i>Synchiropus goodenbeani</i>      | See NCBI SRA                                             | SAMN22936067 |   |   |
| Sygnathiformes | Callionymidae       | <i>Synchiropus masudai</i>          | See NCBI SRA                                             | SAMN06563077 |   |   |
| Sygnathiformes | Callionymidae       | <i>Synchiropus moyeri</i>           | See NCBI SRA                                             | SAMN06563122 |   |   |
| Sygnathiformes | Callionymidae       | <i>Synchiropus ocellatus</i>        | See NCBI SRA                                             | SAMN06563123 |   |   |
| Sygnathiformes | Callionymidae       | <i>Synchiropus picturatus</i>       | See NCBI SRA                                             | SAMN06563124 | ✓ |   |
| Sygnathiformes | Callionymidae       | <i>Synchiropus splendidus</i>       | See NCBI SRA                                             | SAMN06563125 | ✓ |   |
| Sygnathiformes | Callionymidae       | <i>Synchiropus stellatus</i>        | See NCBI SRA                                             | SAMN06563101 | ✓ |   |
| Sygnathiformes | Centriscidae        | <i>Aeoliscus strigatus</i>          | See NCBI SRA                                             | SAMN06563035 | ✓ |   |
| Sygnathiformes | Centriscidae        | <i>Centriscus scutatus</i>          | See NCBI SRA                                             | SAMN06563045 |   | ✓ |
| Sygnathiformes | Centriscidae        | <i>Macroramphosus gracilis</i>      | See NCBI SRA                                             | SAMN06563091 | ✓ |   |
| Sygnathiformes | Centriscidae        | <i>Macroramphosus scolopax</i>      | See NCBI SRA<br>KUIT 6839, SAIAB<br>77945                | SAMN06563092 | ✓ |   |
| Sygnathiformes | <i>Aulostomus</i>   | <i>Aulostomus chinensis</i>         |                                                          | SAMN13222435 | ✓ |   |
| Sygnathiformes | <i>Aulostomus</i>   | <i>Aulostomus maculatus</i>         | See NCBI SRA                                             | SAMN06563038 | ✓ |   |
| Sygnathiformes | <i>Fistularia</i>   | <i>Fistularia commersonii</i>       | See NCBI SRA                                             | SAMN06563071 | ✓ |   |
| Sygnathiformes | <i>Fistularia</i>   | <i>Fistularia corneta</i>           | See NCBI SRA                                             | SAMN06563072 | ✓ |   |
| Sygnathiformes | <i>Fistularia</i>   | <i>Fistularia petimba</i>           | See NCBI SRA                                             | SAMN06563073 | ✓ |   |
| Sygnathiformes | <i>Fistularia</i>   | <i>Fistularia tabacaria</i>         | See NCBI SRA                                             | SAMN06563074 |   |   |
| Sygnathiformes | <i>Solenostomus</i> | <i>Solenostomus cyanopterus</i>     | See NCBI SRA                                             | SAMN06563117 |   |   |
| Sygnathiformes | <i>Solenostomus</i> | <i>Solenostomus paradoxus</i>       | See NCBI SRA                                             | SAMN06563118 |   |   |
| Sygnathiformes | Syngnathidae        | <i>Choeroichthys sculptus</i>       | See NCBI SRA                                             | SAMN06563046 |   |   |
| Sygnathiformes | Syngnathidae        | <i>Corythoichthys amplexus</i>      | See NCBI SRA                                             | SAMN06563047 | ✓ |   |
| Sygnathiformes | Syngnathidae        | <i>Corythoichthys haematopterus</i> | See NCBI SRA                                             | SAMN06563049 | ✓ |   |

|                |              |                                      |              |              |     |
|----------------|--------------|--------------------------------------|--------------|--------------|-----|
| Sygnathiformes | Syngnathidae | <i>Corythoichthys intestinalis</i>   | See NCBI SRA | SAMN06563050 | ✓   |
| Sygnathiformes | Syngnathidae | <i>Corythoichthys schultzi</i>       | See NCBI SRA | SAMN06563051 | ✓   |
| Sygnathiformes | Syngnathidae | <i>Cosmocampus arctus</i>            | See NCBI SRA | SAMN06563052 | ✓   |
| Sygnathiformes | Syngnathidae | <i>Doryichthys boaja</i>             | See NCBI SRA | SAMN06563059 |     |
| Sygnathiformes | Syngnathidae | <i>Doryichthys martensii</i>         | See NCBI SRA | SAMN06563060 |     |
| Sygnathiformes | Syngnathidae | <i>Doryrhamphus excisus</i>          | See NCBI SRA | SAMN06563061 | ✓   |
| Sygnathiformes | Syngnathidae | <i>Doryrhamphus janssi</i>           | See NCBI SRA | SAMN06563062 |     |
| Sygnathiformes | Syngnathidae | <i>Dunckerocampus boylei</i>         | See NCBI SRA | SAMN06563064 |     |
| Sygnathiformes | Syngnathidae | <i>Dunckerocampus dactyliophorus</i> | See NCBI SRA | SAMN22936037 |     |
| Sygnathiformes | Syngnathidae | <i>Enneacampus ansorgii</i>          | See NCBI SRA | SAMN06563067 |     |
| Sygnathiformes | Syngnathidae | <i>Entelurus aequoreus</i>           | See NCBI SRA | SAMN06563068 | ✓   |
| Sygnathiformes | Syngnathidae | <i>Festucalex wassi</i>              | See NCBI SRA | SAMN06563070 |     |
| Sygnathiformes | Syngnathidae | <i>Halicampus crinitus</i>           | See NCBI SRA | SAMN06563093 | ✓   |
| Sygnathiformes | Syngnathidae | <i>Halicampus dunckeri</i>           | See NCBI SRA | SAMN06563078 | ✓   |
| Sygnathiformes | Syngnathidae | <i>Hippichthys penicillus</i>        | See NCBI SRA | SAMN06563079 | ✓   |
| Sygnathiformes | Syngnathidae | <i>Hippocampus abdominalis</i>       | See NCBI SRA | SAMN06563080 | ✓   |
| Sygnathiformes | Syngnathidae | <i>Hippocampus barbouri</i>          | See NCBI SRA | SAMN22936099 | ✓   |
| Sygnathiformes | Syngnathidae | <i>Hippocampus comes</i>             | See NCBI SRA | SAMN06563082 | ✓ ✓ |
| Sygnathiformes | Syngnathidae | <i>Hippocampus ingens</i>            | See NCBI SRA | SAMN22936100 | ✓   |
| Sygnathiformes | Syngnathidae | <i>Hippocampus kuda</i>              | See NCBI SRA | SAMN22936101 | ✓   |
| Sygnathiformes | Syngnathidae | <i>Hippocampus reidi</i>             | See NCBI SRA | SAMN06563087 | ✓   |
| Sygnathiformes | Syngnathidae | <i>Hippocampus subelongatus</i>      | See NCBI SRA | SAMN06563088 |     |
| Sygnathiformes | Syngnathidae | <i>Hypselognathus rostratus</i>      | See NCBI SRA | SAMN06563089 |     |
| Sygnathiformes | Syngnathidae | <i>Idiotropiscis lumnitzeri</i>      | See NCBI SRA | SAMN06563090 |     |
| Sygnathiformes | Syngnathidae | <i>Microphis brachyurus</i>          | See NCBI SRA | SAMN06563094 | ✓   |
| Sygnathiformes | Syngnathidae | <i>Microphis cuncalus</i>            | See NCBI SRA | SAMN06563095 |     |
| Sygnathiformes | Syngnathidae | <i>Microphis deocata</i>             | See NCBI SRA | SAMN06563096 |     |
| Sygnathiformes | Syngnathidae | <i>Nerophis ophidion</i>             | See NCBI SRA | SAMN06563102 | ✓   |
| Sygnathiformes | Syngnathidae | <i>Phycodurus eques</i>              | See NCBI SRA | SAMN06563110 |     |
| Sygnathiformes | Syngnathidae | <i>Phyllopteryx taeniolatus</i>      | See NCBI SRA | SAMN06563111 |     |
| Sygnathiformes | Syngnathidae | <i>Siokunichthys nigrolineatus</i>   | See NCBI SRA | SAMN06563116 |     |
| Sygnathiformes | Syngnathidae | <i>Stigmatopora nigra</i>            | See NCBI SRA | SAMN06563119 |     |
| Sygnathiformes | Syngnathidae | <i>Stigmatopora nigra</i>            | See NCBI SRA | SAMN22936400 |     |
| Sygnathiformes | Syngnathidae | <i>Syngnathoides biaculeatus</i>     | See NCBI SRA | SAMN06563126 | ✓   |
| Sygnathiformes | Syngnathidae | <i>Syngnathus abaster</i>            | See NCBI SRA | SAMN06563127 | ✓   |
| Sygnathiformes | Syngnathidae | <i>Syngnathus acus</i>               | See NCBI SRA | SAMN06563128 |     |
| Sygnathiformes | Syngnathidae | <i>Syngnathus auliscus</i>           | See NCBI SRA | SAMN06563129 |     |
| Sygnathiformes | Syngnathidae | <i>Syngnathus californiensis</i>     | See NCBI SRA | SAMN06563130 | ✓   |
| Sygnathiformes | Syngnathidae | <i>Syngnathus exilis</i>             | See NCBI SRA | SAMN06563131 |     |
| Sygnathiformes | Syngnathidae | <i>Syngnathus floridae</i>           | See NCBI SRA | SAMN06563132 | ✓   |

|                |                  |                                     |                                                                  |               |     |
|----------------|------------------|-------------------------------------|------------------------------------------------------------------|---------------|-----|
| Sygnathiformes | Syngnathidae     | <i>Syngnathus fuscus</i>            | See NCBI SRA                                                     | SAMN06563133  | ✓   |
| Sygnathiformes | Syngnathidae     | <i>Syngnathus leptorhynchus</i>     | see Longo <i>et al.</i> 2017                                     | SAMN22936406  | ✓   |
| Sygnathiformes | Syngnathidae     | <i>Syngnathus louisianae</i>        | See NCBI SRA                                                     | SAMN06563135  |     |
| Sygnathiformes | Syngnathidae     | <i>Syngnathus pelagicus</i>         | see Longo <i>et al.</i> 2017                                     | SAMN22936407  | ✓   |
| Sygnathiformes | Syngnathidae     | <i>Syngnathus rostellatus</i>       | See NCBI SRA                                                     | SAMN06563137  | ✓   |
| Sygnathiformes | Syngnathidae     | <i>Syngnathus scovelli</i>          | See NCBI SRA                                                     | SAMN06563138  | ✓   |
| Sygnathiformes | Syngnathidae     | <i>Syngnathus springeri</i>         | See NCBI SRA                                                     | SAMN06563139  |     |
| Sygnathiformes | Syngnathidae     | <i>Syngnathus taenionotus</i>       | See NCBI SRA                                                     | SAMN06563140  |     |
| Sygnathiformes | Syngnathidae     | <i>Syngnathus typhle</i>            | See NCBI SRA                                                     | SAMN06563141  | ✓   |
| Sygnathiformes | Syngnathidae     | <i>Trachyrhamphus bicoarctatus</i>  | See NCBI SRA                                                     | SAMN06563143  | ✓   |
| Sygnathiformes | Syngnathidae     | <i>Vanacampus phillipi</i>          | See NCBI SRA                                                     | SAMN06563146  | ✓   |
| Sygnathiformes | Syngnathidae     | <i>Vanacampus poecilolaemus</i>     | See NCBI SRA                                                     | SAMN06563147  |     |
| Blenniiformes  | Adrianichthyidae | <i>Adrianichthys oophorus</i>       | USNM 38982                                                       | SAMN22935841  | ✓   |
| Blenniiformes  | Adrianichthyidae | <i>Oryzias latipes</i>              | YFTC 32445, n.v.                                                 | SAMN22936249  | ✓ ✓ |
| Blenniiformes  | Belonidae        | <i>Nomorhamphus celebensis</i>      | YPM ICH 021568                                                   | SAMN22936229  |     |
| Blenniiformes  | Belonidae        | <i>Xenentodon cancila</i>           | Pers. Coll.: M.Alfaro,<br>Alfaro 586<br>KUIT 4504, CAS<br>222403 | SAMN05915137  | ✓   |
| Blenniiformes  | Belonidae        | <i>Zenarchopterus dispar</i>        | 222403                                                           | SAMN22936451  |     |
| Blenniiformes  | Exocoetidae      | <i>Prognichthys occidentalis</i>    | KUIT 5173, KUI 30212                                             | SAMN22935970  | ✓   |
| Blenniiformes  | Exocoetidae      | <i>Oxyporhamphus micropterus</i>    | LACM 46125.003                                                   | SAMN22936257  | ✓ ✓ |
| Blenniiformes  | Hemiramphidae    | <i>Hyporhamphus dussumieri</i>      | KUIT 4269, KUI 37091<br>KUIT 6756, SAIAB                         | SAMN22936112  | ✓   |
| Blenniiformes  | Hemiramphidae    | <i>Hemiramphus far</i>              | 77898                                                            | SAMN22936092  | ✓   |
| Blenniiformes  | Atherinopsidae   | <i>Atherinella panamensis</i>       | YFTC 16681, n.v.                                                 | SAMN22935876  | ✓   |
| Blenniiformes  | Atherinopsidae   | <i>Melanorhinus microps</i>         | LACM T-000545                                                    | SAMN22936194  |     |
| Blenniiformes  | Atherion         | <i>Atherion elymus</i>              | YFTC 16683, n.v.                                                 | SAMN22935877  |     |
| Blenniiformes  | Phallostethidae  | <i>Neostethus bicornis</i>          | YFTC 16684, n.v.<br>KUIT 2700, USNM                              | SAMN22936226  | ✓   |
| Blenniiformes  | Phallostethidae  | <i>Phenacostethus smithi</i>        | 329346                                                           | SAMN22936290  |     |
| Blenniiformes  | Iso              | <i>Iso rhothophilus</i>             | YFTC 16682, n.v.                                                 | SAMN22936117  | ✓   |
| Blenniiformes  | Atherinidae      | <i>Atherina presbyter</i>           | KUIT 8637                                                        | SAMN22935875  |     |
| Blenniiformes  | Bedotiidae       | <i>Bedotia madagascariensis</i>     | YFTC 21585, n.v.                                                 | SAMN22935894  | ✓   |
| Blenniiformes  | Pseudomugilidae  | <i>Pseudomugil gertrudae</i>        | KUIT 1696, KUI 29882                                             | SAMN22936323  | ✓   |
| Blenniiformes  | Melanotaeniidae  | <i>Cairnsichthys rhombosomoides</i> | YFTC 16675, n.v.                                                 | SAMN22935920  |     |
| Blenniiformes  | Melanotaeniidae  | <i>Iriatherina wernerii</i>         | YPM ICH 025213<br>Pers. Coll.: Reznick Lab                       | SAMN22936116  | ✓   |
| Blenniiformes  | Rivulidae        | <i>Austrofundulus lehoignei</i>     | UCRiverside                                                      | SAMN22935881  | ✓   |
| Blenniiformes  | Rivulidae        | <i>Austrofundulus limnaeus</i>      | See NCBI SRA<br>Pers. Coll.: Reznick Lab                         | SAMN03490872* | ✓   |
| Blenniiformes  | Rivulidae        | <i>Austrolebias nigripinnis</i>     | UCRiverside                                                      | SAMN22935883  |     |
| Blenniiformes  | Rivulidae        | <i>Kryptolebias marmoratus</i>      | See NCBI SRA                                                     | SAMN04622665* | ✓   |
| Blenniiformes  | Aplocheilidae    | <i>Aplocheilus lineatus</i>         | YPM ICH 025213                                                   | SAMN22935864  | ✓   |
| Blenniiformes  | Aplocheilidae    | <i>Aplocheilus panchax</i>          | YPM ICH 025220                                                   | SAMN22935865  | ✓   |

|               |                      |                                   |                                      |               |   |   |
|---------------|----------------------|-----------------------------------|--------------------------------------|---------------|---|---|
| Blenniiformes | Nothobranchiidae     | <i>Aphyosemion thysi</i>          | AMNH 258919                          | SAMN22935863  | ✓ |   |
| Blenniiformes | Nothobranchiidae     | <i>Epiplatys spilargyrea</i>      | AMNH 257025                          | SAMN22936049  | ✓ | ✓ |
| Blenniiformes | Nothobranchiidae     | <i>Nothobranchius furzeri</i>     | See NCBI SRA                         | SAMEA2698544* |   |   |
| Blenniiformes | Nothobranchiidae     | <i>Nothobranchius orthonotus</i>  | See NCBI SRA                         | SAMEA2698544* |   |   |
| Blenniiformes | <i>Cubanichthys</i>  | <i>Cubanichthys pengelleyi</i>    | YFTC 16678, n.v.                     | SAMN22936009  |   |   |
| Blenniiformes | Goodeidae            | <i>Goodea atripinnis</i>          | SLU 6644                             | SAMN22936081  | ✓ |   |
| Blenniiformes | Profundulidae        | <i>Tlaloc labialis</i>            | SLU 8114                             | SAMN22936320  |   |   |
| Blenniiformes | Cyprinodontidae      | <i>Cyprinodon nevadensis</i>      | See NCBI SRA                         | SAMN03072616* | ✓ |   |
| Blenniiformes | Cyprinodontidae      | <i>Cyprinodon variegatus</i>      | See NCBI SRA                         | SAMN02736898* | ✓ |   |
| Blenniiformes | Cyprinodontidae      | <i>Floridichthys carpio</i>       | KUIT 6534, KUI 35360                 | SAMN22936066  | ✓ |   |
| Blenniiformes | Fundulidae           | <i>Fundulus heteroclitus</i>      | See NCBI SRA                         | SAMN03277211* |   |   |
| Blenniiformes | Fundulidae           | <i>Fundulus zebrinus</i>          | YFTC 16686, n.v.                     | SAMN22936068  | ✓ | ✓ |
| Blenniiformes | Fundulidae           | <i>Leptolucania ommata</i>        | YFTC 23708, n.v.                     | SAMN22936142  |   |   |
| Blenniiformes | Procatopodidae       | <i>Poropanchax normani</i>        | YPM ICH 025212                       | SAMN22936313  |   |   |
| Blenniiformes | <i>Valencia</i>      | <i>Valencia hispanica</i>         | MNCN/ADN 63424                       | SAMN22936436  | ✓ |   |
| Blenniiformes | <i>Valencia</i>      | <i>Valencia letourneuxi</i>       | YFTC 25747, n.v.                     | SAMN22936437  |   |   |
| Blenniiformes | Poeciliidae          | <i>Anableps anableps</i>          | YPM ICH 024513                       | SAMN22935853  | ✓ |   |
| Blenniiformes | Poeciliidae          | <i>Gambusia affinis</i>           | See NCBI SRA                         | SAMN07157452* | ✓ | ✓ |
| Blenniiformes | Poeciliidae          | <i>Gambusia holbrooki</i>         | MNCN/ADN 59090                       | SAMN22936069  | ✓ |   |
| Blenniiformes | Poeciliidae          | <i>Poecilia latipinna</i>         | See NCBI SRA                         | SAMN02048973* | ✓ |   |
| Blenniiformes | Poeciliidae          | <i>Poecilia mexicana</i>          | See NCBI SRA                         | SAMN02048972* | ✓ |   |
| Blenniiformes | Poeciliidae          | <i>Poecilia reticulata</i>        | See NCBI SRA                         | SAMN02404645* | ✓ |   |
| Blenniiformes | Poeciliidae          | <i>Xiphophorus couchianus</i>     | See NCBI SRA                         | SAMN03922721* | ✓ |   |
| Blenniiformes | Poeciliidae          | <i>Xiphophorus hellerii</i>       | See NCBI SRA                         | SAMN09545741* | ✓ |   |
| Blenniiformes | Polycentridae        | <i>Monocirrhus polyacanthus</i>   | P.Wainwright, PW1656<br>Pers. Coll.: | SAMN22936204  | ✓ | ✓ |
| Blenniiformes | Polycentridae        | <i>Polycentrus schomburgkii</i>   | P.Wainwright, PW1659<br>Pers. Coll.: | SAMN22936304  |   |   |
| Blenniiformes | <i>Pholidichthys</i> | <i>Pholidichthys leucotaenia</i>  | P.Wainwright, PW1329                 | SAMN05915100  | ✓ | ✓ |
| Blenniiformes | Cichlidae            | <i>Amphilophus citrinellus</i>    | See NCBI SRA                         | SAMEA2698536* | ✓ |   |
| Blenniiformes | Cichlidae            | <i>Bathybates minor</i>           | See NCBI SRA                         | SAMN04011497  | ✓ |   |
| Blenniiformes | Cichlidae            | <i>Ectodus descampsi</i>          | See NCBI SRA                         | SAMN04011500  |   |   |
| Blenniiformes | Cichlidae            | <i>Eretmodus cyanostictus</i>     | See NCBI SRA                         | SAMN04011501  | ✓ |   |
| Blenniiformes | Cichlidae            | <i>Haplotaxodon microlepis</i>    | See NCBI SRA                         | SAMN04011503  |   |   |
| Blenniiformes | Cichlidae            | <i>Lamprologus calipterus</i>     | See NCBI SRA                         | SAMN04011505  | ✓ |   |
| Blenniiformes | Cichlidae            | <i>Paratilapia polleni</i>        | YPM ICH 023179                       | SAMN22936271  |   |   |
| Blenniiformes | Cichlidae            | <i>Paretroplus dambabe</i>        | YPM ICH 023180                       | SAMN22936272  | ✓ | ✓ |
| Blenniiformes | Cichlidae            | <i>Pseudotropheus flavus</i>      | See NCBI SRA                         | SAMN04011494  |   |   |
| Blenniiformes | Cichlidae            | <i>Pterophyllum leopoldi</i>      | YPM ICH 023150                       | SAMN05915114  |   | ✓ |
| Blenniiformes | Cichlidae            | <i>Ptychochromis oligacanthus</i> | YPM ICH 023177                       | SAMN22936331  | ✓ |   |
| Blenniiformes | Cichlidae            | <i>Telmatochromis temporalis</i>  | See NCBI SRA                         | SAMN04011535  | ✓ |   |

|               |                 |                                    |                                             |                 |   |   |
|---------------|-----------------|------------------------------------|---------------------------------------------|-----------------|---|---|
| Blenniiformes | Ambassidae      | <i>Ambassis urotaenia</i>          | YPM ICH 020542                              | SAMN22935847    | ✓ |   |
| Blenniiformes | Ambassidae      | <i>Parambassis ranga</i>           | YFTC 1064, n.v.                             | SAMN22935953    | ✓ | ✓ |
| Blenniiformes | Mugilidae       | <i>Crenimugil crenilabis</i>       | YPM ICH 026701                              | SAMN22935994    |   |   |
| Blenniiformes | Mugilidae       | <i>Osteomugil engeli</i>           | YFTC 23617, n.v.                            | SAMN22936209    |   |   |
| Blenniiformes | Congrogadidae   | <i>Congrogadus subducens</i>       | YPM ICH 25208                               | SAMN22935986    |   |   |
| Blenniiformes | Plesiopidae     | <i>Plesiops caeruleolineatus</i>   | YPM ICH 026606                              | SAMN22936299    |   |   |
| Blenniiformes | Plesiopidae     | <i>Plesiops</i> sp.                | Pers. Coll.: M.Alfaro,<br>Alfaro 13MS4      | SAMN05915101    |   |   |
| Blenniiformes | Pseudochromidae | <i>Labracinus cyclophthalmus</i>   | Pers. Coll.:<br>P.Wainwright, PW1689        | SAMN22936127    |   | ✓ |
| Blenniiformes | Pseudochromidae | <i>Pseudochromis flavivertex</i>   | CAS LR151                                   | SAMN05915110    | ✓ |   |
| Blenniiformes | Pseudochromidae | <i>Pseudochromis fuscus</i>        | See NCBI SRA                                | SAMEA4028829*   | ✓ |   |
| Blenniiformes | Pseudochromidae | <i>Pseudochromis sankeyi</i>       | CAS LR117                                   | SAMN05915111    | ✓ |   |
| Blenniiformes | Pomacentridae   | <i>Acanthochromis polyacanthus</i> | See NCBI SRA                                | SAMN06347167*   | ✓ | ✓ |
| Blenniiformes | Pomacentridae   | <i>Amphiprion ocellaris</i>        | See NCBI SRA                                | SAMN07982614*   | ✓ |   |
| Blenniiformes | Pomacentridae   | <i>Amphiprion percula</i>          | See NCBI SRA                                | SAMN08615572*   | ✓ |   |
| Blenniiformes | Pomacentridae   | <i>Chromis chromis</i>             | See NCBI SRA                                | SAMEA4028828*   | ✓ |   |
| Blenniiformes | Pomacentridae   | <i>Chromis enchrysur</i>           | CAS CEN01                                   | SAMN05915054    | ✓ |   |
| Blenniiformes | Pomacentridae   | <i>Pomacentrus philippinus</i>     | YPM ICH 026633                              | SAMN22936308    | ✓ |   |
| Blenniiformes | Pomacentridae   | <i>Stegastes partitus</i>          | YPM ICH 24711                               | SAMN22936392    | ✓ |   |
| Blenniiformes | Embiotocidae    | <i>Embiotoca jacksoni</i>          | Pers. Coll.:<br>P.Wainwright, PW227:<br>B09 | SAMN22936043    | ✓ | ✓ |
| Blenniiformes | Embiotocidae    | <i>Hyperprosopon ellipticus</i>    | INHS 45420                                  | SAMN22936110    | ✓ |   |
| Blenniiformes | Embiotocidae    | <i>Phanerodon furcatus</i>         | Pers. Coll.:<br>P.Wainwright, PW269:<br>B52 | SAMN22936289    | ✓ |   |
| Blenniiformes | Grammatidae     | <i>Gramma loreto</i>               | CAS GLO01                                   | SAMN05915067    | ✓ |   |
| Blenniiformes | Opistognathidae | <i>Opistognathus aurifrons</i>     | YPM ICH 025216                              | SAMN22936245    | ✓ |   |
| Blenniiformes | Gobiesocidae    | <i>Gobiesox maeandricus</i>        | Pers. Coll.:<br>P.Wainwright, PW2497        | SAMN22936080    | ✓ | ✓ |
| Blenniiformes | Gobiesocidae    | <i>Gouania willdenowi</i>          | See NCBI SRA                                | SAMEA104026382* | ✓ |   |
| Blenniiformes | Gobiesocidae    | <i>Lepadichthys lineatus</i>       | KUIT 4109, CAS<br>224422                    | SAMN22936138    |   |   |
| Blenniiformes | Tripterygiidae  | <i>Enneanectes boehlkei</i>        | KUIT 166, USNM<br>327602                    | SAMN22936047    |   |   |
| Blenniiformes | Tripterygiidae  | <i>Lepidonectes corallicola</i>    | SIO 02-82                                   | SAMN22936139    |   |   |
| Blenniiformes | Blenniidae      | <i>Parablennius parvicornis</i>    | See NCBI SRA                                | SAMEA4028827*   | ✓ | ✓ |
| Blenniiformes | Blenniidae      | <i>Scartella cristata</i>          | CAS SCR01                                   | SAMN05915120    | ✓ |   |
| Blenniiformes | Clinidae        | <i>Gibbonsia metzi</i>             | Pers. Coll.:<br>P.Wainwright, PW221:<br>B03 | SAMN22936073    | ✓ |   |
| Blenniiformes | Clinidae        | <i>Muraenoclinus dorsalis</i>      | KUIT 6488                                   | SAMN22936212    |   |   |
| Blenniiformes | Labrisomidae    | <i>Labrisomus nuchipinnis</i>      | CAS LNU08                                   | SAMN05915078    |   |   |
| Blenniiformes | Chaenopsidae    | <i>Emblemariopsis</i> sp.          | CAS EMB01                                   | SAMN05915061    |   |   |
| Blenniiformes | Dactyloscopidae | <i>Dactyloscopus lacteus</i>       | SIO 02-88-1                                 | SAMN22936012    |   |   |
| Blenniiformes | Dactyloscopidae | <i>Gillellus semicinctus</i>       | SIO 01-167                                  | SAMN22936076    | ✓ |   |

|                  |                    |                                    |                                      |              |   |   |
|------------------|--------------------|------------------------------------|--------------------------------------|--------------|---|---|
| Synbranchiformes | <i>Indostomus</i>  | <i>Indostomus crocodilus</i>       | YPM ICH 23894                        | SAMN22936113 |   |   |
| Synbranchiformes | <i>Indostomus</i>  | <i>Indostomus paradoxus</i>        | n.v. tissue whole                    | SAMN22936114 | ✓ | ✓ |
| Synbranchiformes | Synbranchidae      | <i>Monopterus albus</i>            | Per. Coll.: W.L.Smith 22             | SAMN22936207 | ✓ |   |
| Synbranchiformes | Synbranchidae      | <i>Ophisternon aenigmaticum</i>    | LSUMZ 16237                          | SAMN22936239 |   |   |
| Synbranchiformes | Synbranchidae      | <i>Ophisternon bengalense</i>      | UF 235970                            | SAMN22936240 |   |   |
| Synbranchiformes | Synbranchidae      | <i>Synbranchus marmoratus</i>      | KUIT 10406, KUI 41318                | SAMN22936405 |   |   |
| Synbranchiformes | Chaudhuriidae      | <i>Chaudhuria caudata</i>          | UF 173154                            | SAMN22935963 |   |   |
| Synbranchiformes | Mastacembelidae    | <i>Macrogathus aculeatus</i>       | UF 161615                            | SAMN22936177 |   |   |
| Synbranchiformes | Mastacembelidae    | <i>Macrogathus circumcinctus</i>   | UF 170247                            | SAMN22936178 |   |   |
| Synbranchiformes | Mastacembelidae    | <i>Macrogathus zebrinus</i>        | Pers. Coll.: J.Day                   | SAMN22936179 | ✓ |   |
| Synbranchiformes | Mastacembelidae    | <i>Mastacembelus armatus</i>       | Pers. Coll.: J.Day                   | SAMN22936185 | ✓ |   |
| Synbranchiformes | Mastacembelidae    | <i>Mastacembelus flavidus</i>      | SAIAB 79915                          | SAMN22936186 |   |   |
| Synbranchiformes | Mastacembelidae    | <i>Mastacembelus mastacembelus</i> | Pers. Coll.: J.Day JF1390            | SAMN22936187 |   |   |
| Synbranchiformes | Mastacembelidae    | <i>Mastacembelus unicolor</i>      | UF 166011                            | SAMN22936188 |   | ✓ |
| Synbranchiformes | <i>Pristolepis</i> | <i>Pristolepis fasciata</i>        | UF 162364                            | SAMN22936318 | ✓ |   |
| Synbranchiformes | Badidae            | <i>Badis badis</i>                 | Pers. Coll.: J.Day                   | SAMN22935884 | ✓ |   |
| Synbranchiformes | Badidae            | <i>Badis pyema</i>                 | YFTC 18189, n.v.                     | SAMN22935885 | ✓ |   |
| Synbranchiformes | Badidae            | <i>Dario dario</i>                 | YFTC 18190, n.v.                     | SAMN22936014 |   |   |
| Synbranchiformes | Badidae            | <i>Dario hysginon</i>              | YFTC 20196, n.v.                     | SAMN22936015 | ✓ |   |
| Synbranchiformes | Nandidae           | <i>Nandus andrewi</i>              | Pers. Coll.:<br>P.Wainwright, PW1657 | SAMN22936215 |   |   |
| Synbranchiformes | Nandidae           | <i>Nandus nandus</i>               | Pers. Coll.:<br>P.Wainwright, PW1663 | SAMN22936217 | ✓ |   |
| Synbranchiformes | Nandidae           | <i>Nandus nebulosus</i>            | Pers. Coll.:<br>P.Wainwright, PW1660 | SAMN22936218 | ✓ |   |
| Synbranchiformes | Nandidae           | <i>Nandus cf. oxyrhynchus</i>      | Pers. Coll.: W.L.Smith<br>488        | SAMN22936216 | ✓ |   |
| Synbranchiformes | Channidae          | <i>Channa andrao</i>               | Pers. Coll.: J.Day                   | SAMN22935954 |   |   |
| Synbranchiformes | Channidae          | <i>Channa argus</i>                | CBM 12593                            | SAMN22935955 |   |   |
| Synbranchiformes | Channidae          | <i>Channa aurantimaculata</i>      | Pers. Coll.: J.Day                   | SAMN22935956 |   |   |
| Synbranchiformes | Channidae          | <i>Channa bleheri</i>              | Pers. Coll.: J.Day                   | SAMN22935957 |   |   |
| Synbranchiformes | Channidae          | <i>Channa gachua</i>               | Pers. Coll.: J.Day                   | SAMN22935958 | ✓ |   |
| Synbranchiformes | Channidae          | <i>Channa lucius</i>               | UF 236121                            | SAMN22935959 |   |   |
| Synbranchiformes | Channidae          | <i>Channa marulius</i>             | UF 237264                            | SAMN22935960 | ✓ |   |
| Synbranchiformes | Channidae          | <i>Channa micropeltes</i>          | Pers. Coll.: W.L.Smith<br>355        | SAMN22935961 | ✓ |   |
| Synbranchiformes | Channidae          | <i>Channa striata</i>              | UF 173357                            | SAMN22935962 | ✓ |   |
| Synbranchiformes | Channidae          | <i>Parachanna insignis</i>         | CUMV 96133                           | SAMN22936263 |   |   |
| Synbranchiformes | Channidae          | <i>Parachanna obscura</i>          | CUMV 96491                           | SAMN22936264 |   |   |
| Synbranchiformes |                    | <i>Helostoma temminckii</i>        | Pers. Coll.: W.L.Smith<br>36         | SAMN22936090 | ✓ |   |
| Synbranchiformes | Anabantidae        | <i>Anabas testudineus</i>          | UF 237404                            | SAMN22935852 | ✓ |   |
| Synbranchiformes | Anabantidae        | <i>Ctenopoma acutirostre</i>       | CUMV 93049                           | SAMN22936000 | ✓ |   |
| Synbranchiformes | Anabantidae        | <i>Ctenopoma gabonense</i>         | CUMV 87803                           | SAMN22936001 |   |   |

|                  |               |                                     |                                              |              |   |
|------------------|---------------|-------------------------------------|----------------------------------------------|--------------|---|
| Synbranchiformes | Anabantidae   | <i>Ctenopoma kingsleyae</i>         | CUMV 91505                                   | SAMN22936002 | ✓ |
| Synbranchiformes | Anabantidae   | <i>Ctenopoma maculatum</i>          | CUMV 92275                                   | SAMN22936003 |   |
| Synbranchiformes | Anabantidae   | <i>Ctenopoma multispine</i>         | CUMV 91229                                   | SAMN22936004 |   |
| Synbranchiformes | Anabantidae   | <i>Ctenopoma muriei</i>             | CUMV 94531                                   | SAMN22936005 | ✓ |
| Synbranchiformes | Anabantidae   | <i>Ctenopoma nigropannosum</i>      | CUMV 96662<br>Pers. Coll.: W.L.Smith         | SAMN22936006 | ✓ |
| Synbranchiformes | Anabantidae   | <i>Ctenopoma ocellatum</i>          | 279                                          | SAMN22936007 |   |
| Synbranchiformes | Anabantidae   | <i>Microctenopoma ansorgii</i>      | YPM ICH 025197                               | SAMN22936196 | ✓ |
| Synbranchiformes | Anabantidae   | <i>Microctenopoma fasciolatum</i>   | YPM ICH 32030                                | SAMN22936197 |   |
| Synbranchiformes | Anabantidae   | <i>Microctenopoma nanum</i>         | CUMV 93021                                   | SAMN22936198 | ✓ |
| Synbranchiformes | Anabantidae   | <i>Microctenopoma pekkolai</i>      | CUMV 94529                                   | SAMN22936199 |   |
| Synbranchiformes | Anabantidae   | <i>Microctenopoma uelense</i>       | CUMV 91502                                   | SAMN22936200 |   |
| Synbranchiformes | Anabantidae   | <i>Sandelia bainsii</i>             | SAIAB 199798                                 | SAMN22936347 |   |
| Synbranchiformes | Anabantidae   | <i>Sandelia capensis</i>            | SAIAB 186085                                 | SAMN22936349 | ✓ |
| Synbranchiformes | Anabantidae   | <i>Sandelia capensis</i>            | SAIAB 186114                                 | SAMN22936349 |   |
| Synbranchiformes | Anabantidae   | <i>Sandelia capensis</i>            | SAIAB 186029                                 | SAMN22936348 |   |
| Synbranchiformes | Osphronemidae | <i>Belontia hasselti</i>            | UF 165962                                    | SAMN22935895 | ✓ |
| Synbranchiformes | Osphronemidae | <i>Betta albimarginata</i>          | Pers. Coll.: J.Day                           | SAMN22935899 |   |
| Synbranchiformes | Osphronemidae | <i>Betta macrostoma</i>             | Pers. Coll.: J.Day                           | SAMN22935900 | ✓ |
| Synbranchiformes | Osphronemidae | <i>Betta mandor</i>                 | YPM ICH 34720                                | SAMN22935901 |   |
| Synbranchiformes | Osphronemidae | <i>Betta splendens</i>              | Pers. Coll.: J.Day                           | SAMN22935902 | ✓ |
| Synbranchiformes | Osphronemidae | <i>Ctenops nobilis</i>              | YPM ICH 33735                                | SAMN22936008 | ✓ |
| Synbranchiformes | Osphronemidae | <i>Luciocephalus aura</i>           | UF 167012<br>Pers. Coll.: W.L.Smith          | SAMN22936150 |   |
| Synbranchiformes | Osphronemidae | <i>Luciocephalus pulcher</i>        | 718                                          | SAMN22936151 |   |
| Synbranchiformes | Osphronemidae | <i>Macropodus ocellatus</i>         | CBM 12607                                    | SAMN22936180 |   |
| Synbranchiformes | Osphronemidae | <i>Macropodus opercularis</i>       | Pers. Coll.: J.Day<br>Pers. Coll.: W.L.Smith | SAMN22936181 | ✓ |
| Synbranchiformes | Osphronemidae | <i>Osphronemus goramy</i>           | 536                                          | SAMN22936251 | ✓ |
| Synbranchiformes | Osphronemidae | <i>Osphronemus latyclavius</i>      | YFTC 20201, n.v.                             | SAMN22936252 |   |
| Synbranchiformes | Osphronemidae | <i>Parasphaerichthys ocellatus</i>  | YPM ICH 32028                                | SAMN22936269 | ✓ |
| Synbranchiformes | Osphronemidae | <i>Parosphromenus deissneri</i>     | Pers. Coll.: J.Day                           | SAMN22936273 | ✓ |
| Synbranchiformes | Osphronemidae | <i>Parosphromenus linkei</i>        | YFTC 20193, n.v.                             | SAMN22936274 |   |
| Synbranchiformes | Osphronemidae | <i>Pseudosphromenus cupanus</i>     | YPM ICH 33699<br>Pers. Coll.: W.L.Smith      | SAMN22936327 |   |
| Synbranchiformes | Osphronemidae | <i>Sphaerichthys osphromenoides</i> | 308                                          | SAMN22936384 | ✓ |
| Synbranchiformes | Osphronemidae | <i>Sphaerichthys vaillanti</i>      | Pers. Coll.: J.Day                           | SAMN22936385 |   |
| Synbranchiformes | Osphronemidae | <i>Trichogaster chuna</i>           | Pers. Coll.: J.Day                           | SAMN22936422 |   |
| Synbranchiformes | Osphronemidae | <i>Trichogaster labiosa</i>         | YPM ICH 32029                                | SAMN22936423 | ✓ |
| Synbranchiformes | Osphronemidae | <i>Trichogaster lalius</i>          | Pers. Coll.: J.Day                           | SAMN22936424 | ✓ |
| Synbranchiformes | Osphronemidae | <i>Trichopodus leerii</i>           | Pers. Coll.: J.Day                           | SAMN22936426 | ✓ |
| Synbranchiformes | Osphronemidae | <i>Trichopodus microlepis</i>       | Pers. Coll.: J.Day                           | SAMN22936427 |   |
| Synbranchiformes | Osphronemidae | <i>Trichopodus pectoralis</i>       | YPM ICH 021566                               | SAMN22936428 | ✓ |



|                  |                  |                                     |                               |              |   |
|------------------|------------------|-------------------------------------|-------------------------------|--------------|---|
| Synbranchiformes | Osphronemidae    | <i>Trichopodus trichopterus</i>     | LSUMZ 13914                   | SAMN22936429 | ✓ |
| Synbranchiformes | Osphronemidae    | <i>Trichopsis pumila</i>            | n.v.                          | SAMN22936431 | ✓ |
| Synbranchiformes | Osphronemidae    | <i>Trichopsis vittata</i>           | UF 162202                     | SAMN22936432 | ✓ |
| Carangiformes    | Centropomidae    | <i>Lates calcarifer</i>             | NTM 92                        | SAMN05785344 | ✓ |
| Carangiformes    | Centropomidae    | <i>Centropomus ensiferus</i>        | LSUMZ 16022                   | SAMN22935943 | ✓ |
| Carangiformes    | Centropomidae    | <i>Centropomus medius</i>           | KUIT 8498, KUI 40301          | SAMN05915046 | ✓ |
| Carangiformes    |                  | <i>Lactarius lactarius</i>          | NSMT-P 91244                  | SAMN22936130 |   |
| Carangiformes    | <i>Sphyraena</i> | <i>Sphyraena barracuda</i>          | LSUMZ 15881                   | SAMN22936386 | ✓ |
| Carangiformes    | <i>Sphyraena</i> | <i>Sphyraena jello</i>              | LSUMZ 17037                   | SAMN22936387 | ✓ |
| Carangiformes    | <i>Sphyraena</i> | <i>Sphyraena pinguis</i>            | LSUMZ 17074                   | SAMN22936388 | ✓ |
| Carangiformes    | <i>Sphyraena</i> | <i>Sphyraena putnamae</i>           | KUIT 6785, photo<br>voucher   | SAMN05915126 | ✓ |
| Carangiformes    | <i>Sphyraena</i> | <i>Sphyraena sphyraena</i>          | Pers. Coll.: W.L.Smith<br>499 | SAMN05785363 |   |
| Carangiformes    | Polynemidae      | <i>Eleutheronema tetradactylum</i>  | Pers. Coll.: H.Larson         | SAMN05785336 | ✓ |
| Carangiformes    | Polynemidae      | <i>Polydactylus approximans</i>     | LSUMZ 17875                   | SAMN22936305 | ✓ |
| Carangiformes    | Polynemidae      | <i>Polydactylus sexfilis</i>        | KUIT 6829, SAIAB<br>77939     | SAMN05915103 |   |
| Carangiformes    | Polynemidae      | <i>Polynemus melanochir</i>         | LSUMZ 14165                   | SAMN22936306 |   |
| Carangiformes    | <i>Psettodes</i> | <i>Psettodes enumeeri</i>           | LSUMZ 5295                    | SAMN05785354 | ✓ |
| Carangiformes    | Citharidae       | <i>Brachypleura novaezeelandiae</i> | LSUMZ 13790                   | SAMN22935914 |   |
| Carangiformes    | Citharidae       | <i>Citharus linguatula</i>          | Pers. Coll.: W.L.Smith<br>596 | SAMN05785330 |   |
| Carangiformes    | Citharidae       | <i>Citharoides macrolepis</i>       | KUIT 2468, KUI 27264          | SAMN05915055 | ✓ |
| Carangiformes    | Achiridae        | <i>Gymnachirus melas</i>            | KUIT 5187, KUI 30098          | SAMN05785338 | ✓ |
| Carangiformes    | Achiridae        | <i>Trinectes maculatus</i>          | KUIT 1501, KUI 27162          | SAMN05785371 | ✓ |
| Carangiformes    | Achiropsettidae  | <i>Mancopsetta maculata</i>         | Pers. Coll.: W.L.Smith<br>714 | SAMN05785346 |   |
| Carangiformes    | Achiropsettidae  | <i>Neoachiropsetta milfordi</i>     | Pers. Coll.: W.L.Smith<br>715 | SAMN05785350 |   |
| Carangiformes    | Samaridae        | <i>Samaris cristatus</i>            | SAIAB 82287                   | SAMN22936345 | ✓ |
| Carangiformes    | Samaridae        | <i>Samariscus filipectoralis</i>    | LSUMZ 13484                   | SAMN22936346 |   |
| Carangiformes    | Samaridae        | <i>Samariscus xenicus</i>           | KUIT 2484, KUI 27266          | SAMN05785357 | ✓ |
| Carangiformes    | Poecilopsettidae | <i>Poecilopsetta natalensis</i>     | SAIAB 81888                   | SAMN22936301 |   |
| Carangiformes    | Poecilopsettidae | <i>Poecilopsetta plinthus</i>       | KUIT 2473, KUI 27256          | SAMN05915102 | ✓ |
| Carangiformes    | Poecilopsettidae | <i>Poecilopsetta zanzibarensis</i>  | SAIAB 82402                   | SAMN22936302 |   |
| Carangiformes    | Cynoglossidae    | <i>Cynoglossus lingua</i>           | LSUMZ 17034                   | SAMN22936011 | ✓ |
| Carangiformes    | Cynoglossidae    | <i>Paraplagusia japonica</i>        | LSUMZ 17060                   | SAMN22936267 |   |
| Carangiformes    | Cynoglossidae    | <i>Symphurus plagiusa</i>           | AMNH 474                      | SAMN05785364 |   |
| Carangiformes    | Soleidae         | <i>Aseraggodes xenicus</i>          | KUIT 5719, KUI 32536          | SAMN05915093 | ✓ |
| Carangiformes    | Soleidae         | <i>Austroglossus pectoralis</i>     | SAIAB 200601                  | SAMN22935882 |   |
| Carangiformes    | Soleidae         | <i>Dagetichthys marginatus</i>      | SAIAB 200744                  | SAMN22936404 |   |
| Carangiformes    | Soleidae         | <i>Heteromycteris capensis</i>      | SAIAB 191581                  | SAMN22936095 |   |
| Carangiformes    | Soleidae         | <i>Solea turbynei</i>               | SAIAB 82350                   | SAMN22936382 | ✓ |

|               |                   |                                     |                                   |               |   |
|---------------|-------------------|-------------------------------------|-----------------------------------|---------------|---|
| Carangiformes | Scophthalmidae    | <i>Scophthalmus maximus</i>         | See NCBI SRA                      | SAMN08049846* | ✓ |
| Carangiformes | Scophthalmidae    | <i>Scophthalmus rhombus</i>         | KUIT 5416, n.v.                   | SAMN05785360  | ✓ |
| Carangiformes | Pleuronectidae    | <i>Pleuronichthys cornutus</i>      | LSUMZ 17067                       | SAMN22936300  | ✓ |
| Carangiformes | Pleuronectidae    | <i>Pleuronichthys guttulatus</i>    | SIO 01-179                        | SAMN05785340  |   |
| Carangiformes | Pleuronectidae    | <i>Pseudopleuronectes yokohamae</i> | LSUMZ 17053                       | SAMN22936325  | ✓ |
| Carangiformes | Paralichthyidae   | <i>Ancylosetta dilecta</i>          | LSUMZ 15797                       | SAMN22935857  |   |
| Carangiformes | Paralichthyidae   | <i>Paralichthys albigutta</i>       | AMNH Uncat E172                   | SAMN05785351  | ✓ |
| Carangiformes | Paralichthyidae   | <i>Paralichthys oblongus</i>        | KUIT 1493, KUI 27158              | SAMN05915073  | ✓ |
| Carangiformes | Paralichthyidae   | <i>Pseudorhombus elevatus</i>       | LSUMZ 16603                       | SAMN22936326  | ✓ |
| Carangiformes | Cyclopsettidae    | <i>Citharichthys spilopterus</i>    | LSUMZ 15927                       | SAMN22935984  |   |
| Carangiformes | Cyclopsettidae    | <i>Cyclopsetta fimbriata</i>        | KUIT 3985, KUI 29710              | SAMN05785333  | ✓ |
| Carangiformes | Cyclopsettidae    | <i>Etropus cyclosquamus</i>         | KUIT 5241, KUI 30193              | SAMN05785337  | ✓ |
| Carangiformes | Cyclopsettidae    | <i>Syacium gunteri</i>              | LSUMZ 15543                       | SAMN22936401  | ✓ |
| Carangiformes | Bothidae          | <i>Bothus pantherinus</i>           | KUIT 5642, SAIAB<br>86150         | SAMN05915039  | ✓ |
| Carangiformes | Bothidae          | <i>Crossorhombus azureus</i>        | LSUMZ 14148                       | SAMN22935995  | ✓ |
| Carangiformes | Bothidae          | <i>Crossorhombus kobensis</i>       | KUIT 2485, KUI 27267              | SAMN05785332  |   |
| Carangiformes | Bothidae          | <i>Engyophrys senta</i>             | LSUMZ 15538                       | SAMN22936044  |   |
| Carangiformes | Bothidae          | <i>Trichopsetta ventralis</i>       | LSUMZ 15806                       | SAMN22936430  |   |
| Carangiformes | <i>Leptobrama</i> | <i>Leptobrama muelleri</i>          | FMNH 119722                       | SAMN05785345  | ✓ |
| Carangiformes | <i>Toxotes</i>    | <i>Toxotes blythii</i>              | YPM ICH 32036                     | SAMN22936414  | ✓ |
| Carangiformes | <i>Toxotes</i>    | <i>Toxotes jaculatrix</i>           | YPM ICH 020543                    | SAMN05915135  | ✓ |
| Carangiformes |                   | <i>Nematistius pectoralis</i>       | LSUMZ 18084                       | SAMN22936221  |   |
| Carangiformes |                   | <i>Mene maculatus</i>               | Pers. Coll.: W.L.Smith<br>370     | SAMN05915082  | ✓ |
| Carangiformes |                   | <i>Xiphias gladius</i>              | Pers. Coll.: W.L.Smith<br>787     | SAMN05785372  | ✓ |
| Carangiformes | Istiophoridae     | <i>Istiophorus platypterus</i>      | KUIT 5428                         | SAMN05915075  |   |
| Carangiformes | Istiophoridae     | <i>Kajikia audax</i>                | SIO 06-38                         | SAMN22936119  |   |
| Carangiformes | Istiophoridae     | <i>Tetrapturus angustirostris</i>   | SIO 05-31                         | SAMN05785366  |   |
| Carangiformes | Trachinotinae     | <i>Scomberoides commersonianus</i>  | KUIT 8988, photo<br>voucher       | SAMN05785359  | ✓ |
| Carangiformes | Trachinotinae     | <i>Scomberoides lysan</i>           | LSUMZ 14159                       | SAMN22936358  | ✓ |
| Carangiformes | Trachinotinae     | <i>Scomberoides tol</i>             | SAIAB AV-2010-091                 | SAMN22936359  | ✓ |
| Carangiformes | Trachinotinae     | <i>Trachinotus baillonii</i>        | SAIAB RB-09-160                   | SAMN22936415  | ✓ |
| Carangiformes | Trachinotinae     | <i>Trachinotus blochii</i>          | KUIT 6793, SAIAB<br>77903         | SAMN05785368  |   |
| Carangiformes | Trachinotinae     | <i>Trachinotus goodei</i>           | YFTC 1994, n.v.<br>KUIT 3521, MCZ | SAMN22936416  | ✓ |
| Carangiformes |                   | <i>Rachycentron canadum</i>         | 157656<br>KUIT 7212, SAIAB        | SAMN05915115  |   |
| Carangiformes |                   | <i>Coryphaena hippurus</i>          | 77983                             | SAMN05915056  | ✓ |
| Carangiformes | Echeneidae        | <i>Echeneis naucrates</i>           | SAIAB HM07-581                    | SAMN22936038  | ✓ |
| Carangiformes | Echeneidae        | <i>Echeneis neucratoides</i>        | KUIT 1201, KUI 27104              | SAMN05785335  |   |
| Carangiformes | Echeneidae        | <i>Phtheichthys lineatus</i>        | SAIAB ACEP-09-224                 | SAMN22936295  | ✓ |

|               |               |                                   |                                                     |              |   |   |
|---------------|---------------|-----------------------------------|-----------------------------------------------------|--------------|---|---|
| Carangiformes | Echeneidae    | <i>Remora albescens</i>           | SIO 05-37                                           | SAMN22936334 | ✓ |   |
| Carangiformes | Echeneidae    | <i>Remora brachyptera</i>         | SIO 07-91                                           | SAMN22936335 | ✓ |   |
| Carangiformes | Echeneidae    | <i>Remora osteochir</i>           | SIO 11-34                                           | SAMN22936336 | ✓ |   |
| Carangiformes | Echeneidae    | <i>Remora remora</i>              | SAIAB ACEP-08-1660                                  | SAMN22936337 | ✓ |   |
| Carangiformes | Carangidae    | <i>Alectis indicus</i>            | KUIT 8966, photo<br>voucher                         | SAMN05915025 | ✓ |   |
| Carangiformes | Carangidae    | <i>Alepes kleinii</i>             | KUIT 8986, photo<br>voucher                         | SAMN05915026 |   |   |
| Carangiformes | Carangidae    | <i>Alepes vari</i>                | QM A01251                                           | SAMN22935844 |   |   |
| Carangiformes | Carangidae    | <i>Alepes vari</i>                | QM I39515                                           | SAMN22935845 |   |   |
| Carangiformes | Carangidae    | <i>Carangichthys dinema</i>       | FRLM 48738                                          | SAMN22935924 |   |   |
| Carangiformes | Carangidae    | <i>Carangoides armatus</i>        | LSUMZ 16745                                         | SAMN22935925 |   |   |
| Carangiformes | Carangidae    | <i>Carangoides armatus</i>        | LSUMZ 16745                                         | SAMN22935925 |   |   |
| Carangiformes | Carangidae    | <i>Carangoides chrysocephalus</i> | SAIAB Event Number:<br>AV/2010-04; n.v.             | SAMN22935926 | ✓ |   |
| Carangiformes | Carangidae    | <i>Carangoides ferdau</i>         | SAIAB Event Number:<br>PCH 2005-27; n.v.            | SAMN22935927 | ✓ |   |
| Carangiformes | Carangidae    | <i>Carangoides praeustus</i>      | FRLM 51405                                          | SAMN22935928 |   |   |
| Carangiformes | Carangidae    | <i>Caranx caninus</i>             | LSUMZ 17829                                         | SAMN22935929 | ✓ |   |
| Carangiformes | Carangidae    | <i>Caranx heberii</i>             | SAIAB Event Number<br>JRG-PDO-15-215; n.v.          | SAMN22935930 |   |   |
| Carangiformes | Carangidae    | <i>Caranx latus</i>               | UF 180908                                           | SAMN22935931 | ✓ | ✓ |
| Carangiformes | Carangidae    | <i>Caranx latus</i>               | UF 183512                                           | SAMN22935932 |   |   |
| Carangiformes | Carangidae    | <i>Caranx melampygus</i>          | KUIT 5657, SAIAB<br>86154                           | SAMN05915044 | ✓ |   |
| Carangiformes | Carangidae    | <i>Caranx vinctus</i>             | LSUMZ 14570                                         | SAMN22935933 |   |   |
| Carangiformes | Carangidae    | <i>Caranx vinctus</i>             | LSUMZ 14585                                         | SAMN22935934 |   |   |
| Carangiformes | Carangidae    | <i>Chloroscombrus orqueta</i>     | KUIT 8495, KUI 40296<br>KUIT 8984, photo<br>voucher | SAMN05915053 | ✓ |   |
| Carangiformes | Carangidae    | <i>Decapterus maruadsi</i>        | LSUMZ 17993                                         | SAMN05785334 | ✓ |   |
| Carangiformes | Carangidae    | <i>Gnathanodon speciosus</i>      | LSUMZ 17993                                         | SAMN22936079 | ✓ |   |
| Carangiformes | Carangidae    | <i>Hemicaranx bicolor</i>         | MNHN 1913-0110                                      | SAMN22936091 | ✓ |   |
| Carangiformes | Carangidae    | <i>Megalaspis cordyla</i>         | KUIT 4705                                           | SAMN05785347 | ✓ |   |
| Carangiformes | Carangidae    | <i>Parastromateus niger</i>       | LSUMZ 17039                                         | SAMN22936270 | ✓ |   |
| Carangiformes | Carangidae    | <i>Selaroides leptolepis</i>      | LSUMZ 14065                                         | SAMN22936371 | ✓ |   |
| Carangiformes | Carangidae    | <i>Selene peruviana</i>           | SIO 07-88L                                          | SAMN22936372 |   |   |
| Carangiformes | Carangidae    | <i>Selene vomer</i>               | LSUMZ 14271                                         | SAMN22936373 | ✓ |   |
| Carangiformes | Carangidae    | <i>Seriola dumerili</i>           | Pers. Coll.:<br>P.Wainwright, PW2629                | SAMN22936374 | ✓ |   |
| Carangiformes | Carangidae    | <i>Seriola dumerili</i>           | SAIAB ACEP-09-314                                   | SAMN22936375 |   |   |
| Carangiformes | Carangidae    | <i>Seriola zonata</i>             | KUIT 1188, KUI 27046                                | SAMN05915125 | ✓ |   |
| Carangiformes | Carangidae    | <i>Trachurus trachurus</i>        | KUIT 8077, n.v.                                     | SAMN05785370 | ✓ |   |
| Perciformes   | Epinephelidae | <i>Cephalopholis argus</i>        | CAS CAG01                                           | SAMN05915047 | ✓ | ✓ |
| Perciformes   | Epinephelidae | <i>Cephalopholis cruentata</i>    | YPM ICH 24718                                       | SAMN22935945 | ✓ |   |
| Perciformes   | Epinephelidae | <i>Diploprion drachi</i>          | Pers. Coll.: G. Bernardi                            | SAMN22936029 | ✓ |   |
| Perciformes   | Epinephelidae | <i>Jeboehlkia gladifer</i>        | AMNH CUR13192                                       | SAMN22936118 |   | ✓ |

|             |               |                                  |                                                 |               |   |   |
|-------------|---------------|----------------------------------|-------------------------------------------------|---------------|---|---|
| Perciformes | Epinephelidae | <i>Liopropoma rubre</i>          | YPM ICH 24752                                   | SAMN22936146  | ✓ |   |
| Perciformes | Epinephelidae | <i>Rypticus subbfrenatus</i>     | YPM ICH 24697                                   | SAMN22936344  | ✓ |   |
| Perciformes | Anthiidae     | <i>Acanthistius cinctus</i>      | Pers. Coll.: L.Liggins,<br>KER-427              | SAMN22935826  | ✓ | ✓ |
| Perciformes | Anthiidae     | <i>Pseudanthias squamipinnis</i> | Pers. Coll.: M.Alfaro,<br>Alfaro-969            | SAMN05915109  | ✓ | ✓ |
| Perciformes | Anthiidae     | <i>Trachypoma macracanthus</i>   | Pers. Coll.: L.Liggins,<br>KER-433              | SAMN22936418  |   |   |
| Perciformes | Bembropidae   | <i>Bembrops anatirostris</i>     | YFTC 14558, n.v.                                | SAMN22935897  | ✓ |   |
| Perciformes | Bembropidae   | <i>Chrionema furunoi</i>         | NSMT-P 78494                                    | SAMN22935982  |   |   |
| Perciformes | Serranidae    | <i>Chelidoperca hirundinacea</i> | NSMT-P115036                                    | SAMN22935971  |   |   |
| Perciformes | Serranidae    | <i>Hypoplectrus puella</i>       | Pers. Coll.: M.Alfaro,<br>Alfaro-1010.1         | SAMN05915074  | ✓ |   |
| Perciformes | Serranidae    | <i>Serranus tigrinus</i>         | Pers. Coll.:<br>P.Wainwright, PW1343:<br>mea207 | SAMN22936376  | ✓ | ✓ |
| Perciformes | Trachinidae   | <i>Echiichthys vipera</i>        | YFTC 24258, n.v.                                | SAMN22936039  |   |   |
| Perciformes | Trachinidae   | <i>Trachinus radiatus</i>        | n.v.                                            | SAMN22936417  | ✓ |   |
| Perciformes |               | <i>Nippon spinosus</i>           | SIO 00-174                                      | SAMN22936228  | ✓ | ✓ |
| Perciformes | Percidae      | <i>Allohistium cinereum</i>      | UT 91.7531                                      | SAMN22936057  | ✓ |   |
| Perciformes | Percidae      | <i>Ammocrypta beanii</i>         | INHS 38611                                      | SAMN22935849  | ✓ |   |
| Perciformes | Percidae      | <i>Ammocrypta pellucida</i>      | YPM ICH 017573                                  | SAMN22935850  | ✓ |   |
| Perciformes | Percidae      | <i>Crystallaria asprella</i>     | YFTC 686, n.v.                                  | SAMN22935997  | ✓ |   |
| Perciformes | Percidae      | <i>Etheostoma baileyi</i>        | UT 91.7240                                      | SAMN22936054  | ✓ |   |
| Perciformes | Percidae      | <i>Etheostoma basilare</i>       | n.v.                                            | SAMN22936055  | ✓ |   |
| Perciformes | Percidae      | <i>Etheostoma blennioides</i>    | YPM ICH 024144                                  | SAMN22936056  |   |   |
| Perciformes | Percidae      | <i>Etheostoma histrio</i>        | YPM ICH 016102                                  | SAMN22936058  | ✓ |   |
| Perciformes | Percidae      | <i>Etheostoma pholidotum</i>     | YPM ICH 015608                                  | SAMN22936059  |   |   |
| Perciformes | Percidae      | <i>Etheostoma swaini</i>         | YPM ICH 027128                                  | SAMN22936060  |   |   |
| Perciformes | Percidae      | <i>Etheostoma variatum</i>       | YPM ICH 23724                                   | SAMN22936061  | ✓ |   |
| Perciformes | Percidae      | <i>Etheostoma zonale</i>         | UT 91.6631                                      | SAMN22936062  | ✓ |   |
| Perciformes | Percidae      | <i>Nothonotus juliae</i>         | INHS 38559                                      | SAMN22936231  |   |   |
| Perciformes | Percidae      | <i>Nothonotus rufilineatus</i>   | UT 91.7011                                      | SAMN22936232  |   |   |
| Perciformes | Percidae      | <i>Perca flavescens</i>          | YPM ICH 027384                                  | SAMN22936278  | ✓ |   |
| Perciformes | Percidae      | <i>Perca fluviatilis</i>         | See NCBI SRA                                    | SAMN08954933* | ✓ |   |
| Perciformes | Percidae      | <i>Percina aurantiaca</i>        | INHS 64349                                      | SAMN22936282  | ✓ |   |
| Perciformes | Percidae      | <i>Percina caprodes</i>          | YPM ICH 27964                                   | SAMN22936283  | ✓ | ✓ |
| Perciformes | Percidae      | <i>Percina cymatotaenia</i>      | YPM ICH 018551                                  | SAMN22936284  | ✓ |   |
| Perciformes | Percidae      | <i>Percina evides</i>            | YPM ICH 023560                                  | SAMN22936285  | ✓ |   |
| Perciformes | Percidae      | <i>Percina macrocephala</i>      | YPM ICH 024352; ex<br>UT 91.7318                | SAMN22936286  | ✓ |   |
| Perciformes | Percidae      | <i>Percina tanasi</i>            | YFTC 25474, n.v.                                | SAMN22936287  | ✓ |   |
| Perciformes | Percidae      | <i>Sander canadensis</i>         | n.v.                                            | SAMN22936351  | ✓ |   |
| Perciformes |               | <i>Percophis brasiliensis</i>    | LBP 8654 T35304                                 | SAMN22936288  | ✓ |   |
| Perciformes | Bovichtidae   | <i>Bovichtus chilensis</i>       | YPM ICH 027476                                  | SAMN22935912  | ✓ |   |

|             |                    |                                   |                                                            |               |   |
|-------------|--------------------|-----------------------------------|------------------------------------------------------------|---------------|---|
| Perciformes | Bovichtidae        | <i>Cottoperca trigloides</i>      | YFTC 3925, n.v.                                            | SAMN22935990  | ✓ |
| Perciformes |                    | <i>Pseudaphritus urvillii</i>     | YFTC 16619, n.v.                                           | SAMN22936321  | ✓ |
| Perciformes |                    | <i>Eleginops maclovinus</i>       | YPM ICH 016549                                             | SAMN22936042  | ✓ |
| Perciformes | "Nototheniidae"    | <i>Notothenia coriiceps</i>       | YPM ICH 016542                                             | SAMN22936235  | ✓ |
| Perciformes | "Nototheniidae"    | <i>Patagonotothen ramsayi</i>     | YFTC 24090, n.v.                                           | SAMN22936276  | ✓ |
| Perciformes | <i>Harpagifer</i>  | <i>Harpagifer bispinis</i>        | YFTC 21691, n.v.                                           | SAMN22936088  | ✓ |
| Perciformes | <i>Harpagifer</i>  | <i>Harpagifer kerguelensis</i>    | YFTC 4830, n.v.                                            | SAMN22936089  |   |
| Perciformes | Artedidraconidae   | <i>Artedidraco glareobarbatus</i> | YFTC 14511, n.v.                                           | SAMN22935869  | ✓ |
| Perciformes | Artedidraconidae   | <i>Pogonophryne cerebropogon</i>  | YFTC 24233, n.v.                                           | SAMN22936303  | ✓ |
| Perciformes | "Bathdraconidae"   | <i>Akarotaxis nudiceps</i>        | YPM ICH 024118                                             | SAMN22935842  | ✓ |
| Perciformes | "Bathdraconidae"   | <i>Parachaenichthys charcoti</i>  | YPM ICH 022368                                             | SAMN22936262  |   |
| Perciformes | Channichthyidae    | <i>Chaenocephalus aceratus</i>    | See NCBI SRA                                               | SAMEA4028820* | ✓ |
| Perciformes | Channichthyidae    | <i>Chionodraco rastrispinosus</i> | YPM ICH 016672                                             | SAMN22935974  | ✓ |
| Perciformes | Channichthyidae    | <i>Pagetopsis macropterus</i>     | NZNM 043556                                                | SAMN22936258  |   |
| Perciformes | Platycephalidae    | <i>Platycephalus indicus</i>      | ASIZ 10910261<br>Pers. Coll.: Leonardo<br>Castro           | SAMN22936298  | ✓ |
| Perciformes |                    | <i>Normanichthys crockeri</i>     |                                                            | SAMN22936230  | ✓ |
| Perciformes | <i>Hoplichthys</i> | <i>Hoplichthys gilberti</i>       | ASIZP 9010790                                              | SAMN22936105  | ✓ |
| Perciformes | <i>Hoplichthys</i> | <i>Hoplichthys langsdorfi</i>     | ASIZP 0913594                                              | SAMN22936106  | ✓ |
| Perciformes | Neosebastidae      | <i>Neosebastes thetidis</i>       | NMV A 22113                                                | SAMN22936225  | ✓ |
| Perciformes | Congiopodidae      | <i>Congiopodus leucopaecilus</i>  | NMNZ P.044580<br>Pers. Coll.:<br>P.Wainwright, PCW<br>3785 | SAMN22935985  | ✓ |
| Perciformes | Synanceiidae       | <i>Inimicus didactylus</i>        |                                                            | SAMN22936115  | ✓ |
| Perciformes | Synanceiidae       | <i>Minous trachycephalus</i>      | NMV A 29712-004                                            | SAMN22936201  | ✓ |
| Perciformes | Scorpaenidae       | <i>Sebastes aleutianus</i>        | See NCBI SRA                                               | SAMN03964772* | ✓ |
| Perciformes | Scorpaenidae       | <i>Sebastes koreanus</i>          | See NCBI SRA                                               | SAMN10490951* |   |
| Perciformes | Scorpaenidae       | <i>Sebastes minor</i>             | See NCBI SRA                                               | SAMN03354192* |   |
| Perciformes | Scorpaenidae       | <i>Sebastes nigrocinctus</i>      | See NCBI SRA                                               | SAMN02981553* | ✓ |
| Perciformes | Scorpaenidae       | <i>Sebastes norvegicus</i>        | See NCBI SRA                                               | SAMEA4028819* | ✓ |
| Perciformes | Scorpaenidae       | <i>Sebastes nudus</i>             | See NCBI SRA                                               | SAMN10490952* |   |
| Perciformes | Scorpaenidae       | <i>Sebastes rubrivinctus</i>      | See NCBI SRA                                               | SAMN02981552* |   |
| Perciformes | Scorpaenidae       | <i>Sebastes schlegelii</i>        | See NCBI SRA                                               | SAMN10490953* | ✓ |
| Perciformes | Scorpaenidae       | <i>Sebastes steindachneri</i>     | See NCBI SRA                                               | SAMN03579458* | ✓ |
| Perciformes | Scorpaenidae       | <i>Taenianotus triacanthus</i>    | Pers. Coll.: M.Alfaro,<br>Alfaro-889                       | SAMN05915130  | ✓ |
| Perciformes | Bembridae          | <i>Bembras japonicus</i>          | ASIZPO 910626                                              | SAMN22935896  |   |
| Perciformes | Bembridae          | <i>Parabembras curtus</i>         | ASIZPO 910628                                              | SAMN22936259  |   |
| Perciformes | Triglidae          | <i>Prionotus evolans</i>          | YPM ICH 017358                                             | SAMN22936315  | ✓ |
| Perciformes | Triglidae          | <i>Pterygotrigla hemisticta</i>   | ASIZP 091046                                               | SAMN22936329  |   |
| Perciformes | Anoplopomatidae    | <i>Anoplopoma fimbria</i>         | See NCBI SRA                                               | SAMN02144194* | ✓ |
| Perciformes | Anoplopomatidae    | <i>Erilepis zonifer</i>           | YPM ICH 026411                                             | SAMN22936051  |   |

|             |                 |                                      |                                             |               |   |
|-------------|-----------------|--------------------------------------|---------------------------------------------|---------------|---|
| Perciformes | Zaniolepididae  | <i>Oxylebius pictus</i>              | UW 113229                                   | SAMN22936256  | ✓ |
| Perciformes | Zaniolepididae  | <i>Zaniolepis frenata</i>            | UW 119888                                   | SAMN22936444  | ✓ |
| Perciformes | Zaniolepididae  | <i>Zaniolepis latipinnis</i>         | FMNH 121496                                 | SAMN22936445  | ✓ |
| Perciformes | Hexagrammidae   | <i>Hexagrammos decagrammus</i>       | INHS 45417                                  | SAMN22936096  | ✓ |
| Perciformes | Trichodontidae  | <i>Trichodon trichodon</i>           | UW 117635                                   | SAMN22936421  | ✓ |
| Perciformes | Cyclopteridae   | <i>Eumicrotremus orbis</i>           | Pers. Coll.:<br>P.Wainwright, PW2499        | SAMN22936065  | ✓ |
| Perciformes | Liparidae       | <i>Liparis mucosus</i>               | n.v.                                        | SAMN22936147  | ✓ |
| Perciformes | Liparidae       | <i>Paraliparis meganchus</i>         | YPM ICH 022466                              | SAMN22936265  | ✓ |
| Perciformes | Liparidae       | <i>Pseudoliparis</i> sp.             | See NCBI SRA                                | SAMN10662039* |   |
| Perciformes | Rhamphocottidae | <i>Ereunias grallator</i>            | Pers. Coll.: M.Miya 01-054                  | SAMN22936050  |   |
| Perciformes | Rhamphocottidae | <i>Rhamphocottus richardsoni</i>     | Pers. Coll.:<br>P.Wainwright, PW2440        | SAMN22936339  |   |
| Perciformes |                 | <i>Scorpaenichthys marmoratus</i>    | Pers. Coll.:<br>P.Wainwright, PW222:<br>B04 | SAMN22936366  | ✓ |
| Perciformes | Agonidae        | <i>Aspidophoroides monopterygius</i> | YPM ICH 020685                              | SAMN22935871  | ✓ |
| Perciformes | Agonidae        | <i>Blepsias cirrhosus</i>            | Pers. Coll.:<br>P.Wainwright, PW2441        | SAMN22935905  | ✓ |
| Perciformes | Agonidae        | <i>Hemitripteris bolini</i>          | UW 151146                                   | SAMN22936093  | ✓ |
| Perciformes | Agonidae        | <i>Stellerina xyosterna</i>          | n.v.                                        | SAMN22936393  | ✓ |
| Perciformes | Cottidae        | <i>Cottus carolinae</i>              | YPM ICH 021076                              | SAMN22935992  | ✓ |
| Perciformes | Cottidae        | <i>Cottus rhenanus</i>               | See NCBI SRA<br>KUIT 3570, MCZ              | SAMN04145896* |   |
| Perciformes | Psychrolutidae  | <i>Cottunculus thomsonii</i>         | 159183                                      | SAMN22935991  | ✓ |
| Perciformes | Psychrolutidae  | <i>Malacocottus zonorus</i>          | KUIT 2319, KUI 28057                        | SAMN22936183  | ✓ |
| Perciformes | Psychrolutidae  | <i>Myoxocephalus aenaeus</i>         | YPM ICH 021194                              | SAMN22936214  | ✓ |
| Perciformes | Psychrolutidae  | <i>Myoxocephalus scorpius</i>        | See NCBI SRA                                | SAMEA4028818* | ✓ |
| Perciformes | Psychrolutidae  | <i>Triglops murrayi</i>              | YPM ICH 020694                              | SAMN22936433  | ✓ |
| Perciformes |                 | <i>Hypoptychus dybowskii</i>         | NSMT-P72827                                 | SAMN22936111  |   |
| Perciformes |                 | <i>Aulichthys japonicus</i>          | NSMT-P72829                                 | SAMN22935878  | ✓ |
| Perciformes | Gasterosteidae  | <i>Gasterosteus islandicus</i>       | YFTC 16641, n.v.                            | SAMN22936070  | ✓ |
| Perciformes | Gasterosteidae  | <i>Pungitius pungitius</i>           | See NCBI SRA                                | SAMN05210078* | ✓ |
| Perciformes | Gasterosteidae  | <i>Spinachia spinachia</i>           | YFTC 16669, n.v.                            | SAMN22936391  | ✓ |
| Perciformes | Bathymasteridae | <i>Bathymaster caeruleofasciatus</i> | UW 150110                                   | SAMN22935891  | ✓ |
| Perciformes | Bathymasteridae | <i>Bathymaster leurolepis</i>        | UW 48567                                    | SAMN22935892  | ✓ |
| Perciformes | Bathymasteridae | <i>Bathymaster signatus</i>          | UW 119600                                   | SAMN22935893  | ✓ |
| Perciformes | Bathymasteridae | <i>Rathbunella hypoplecta</i>        | n.v.                                        | SAMN22936333  |   |
| Perciformes | Bathymasteridae | <i>Ronquilus jordani</i>             | UW 116967                                   | SAMN22936343  | ✓ |
| Perciformes |                 | <i>Cebidichthys violaceus</i>        | INHS 45421                                  | SAMN22935939  | ✓ |
| Perciformes | Stichaeidae     | <i>Alectrias alectrolophus</i>       | UW 47876                                    | SAMN22935843  | ✓ |
| Perciformes | Stichaeidae     | <i>Anoplarchus insignis</i>          | UW 47871                                    | SAMN22935860  | ✓ |
| Perciformes | Stichaeidae     | <i>Anoplarchus purpurescens</i>      | UW 151344                                   | SAMN22936442  | ✓ |

|             |                        |                                   |                                              |              |   |
|-------------|------------------------|-----------------------------------|----------------------------------------------|--------------|---|
| Perciformes | Stichaeidae            | <i>Bryozoichthys lysimus</i>      | UW 150624                                    | SAMN22935917 | ✓ |
| Perciformes | Stichaeidae            | <i>Bryozoichthys marjorius</i>    | UW 150104                                    | SAMN22935918 | ✓ |
| Perciformes | Stichaeidae            | <i>Chirolophis decoratus</i>      | UW 119212                                    | SAMN22935976 | ✓ |
| Perciformes | Stichaeidae            | <i>Chirolophis japonicus</i>      | UW 47908                                     | SAMN22935977 |   |
| Perciformes | Stichaeidae            | <i>Chirolophis snyderi</i>        | UW 150723                                    | SAMN22935978 |   |
| Perciformes | Stichaeidae            | <i>Ernogrammus hexagrammus</i>    | UW 47891                                     | SAMN22936052 | ✓ |
| Perciformes | Stichaeidae            | <i>Eumesogrammus praecisus</i>    | UW 150174                                    | SAMN22936064 | ✓ |
| Perciformes | Stichaeidae            | <i>Phytichthys chirus</i>         | UW 151660                                    | SAMN22936296 |   |
| Perciformes | Stichaeidae            | <i>Scytalina cerdale</i>          | YPM ICH 026410                               | SAMN22936369 |   |
| Perciformes | Stichaeidae            | <i>Stichaeopsis nana</i>          | UW 47889                                     | SAMN22936396 |   |
| Perciformes | Stichaeidae            | <i>Stichaeus grigorjewi</i>       | UW 47895                                     | SAMN22936397 | ✓ |
| Perciformes | Stichaeidae            | <i>Stichaeus nozawai</i>          | UW 47894                                     | SAMN22936398 | ✓ |
| Perciformes | Stichaeidae            | <i>Stichaeus punctatus</i>        | UW 150124                                    | SAMN22936399 | ✓ |
| Perciformes | Stichaeidae            | <i>Xiphister atropurpureus</i>    | UW 151673                                    | SAMN22936440 |   |
| Perciformes | Stichaeidae            | <i>Xiphister mucosus</i>          | UW 151678                                    | SAMN22936441 | ✓ |
| Perciformes | <i>Cryptacanthodes</i> | <i>Cryptacanthodes aleutensis</i> | UW 48737                                     | SAMN22935996 |   |
| Perciformes | <i>Cryptacanthodes</i> | <i>Cryptacanthodes giganteus</i>  | UW 48792                                     | SAMN22936016 |   |
| Perciformes | <i>Cryptacanthodes</i> | <i>Cryptacanthodes maculatus</i>  | YPM ICH 020687                               | SAMN22935996 | ✓ |
| Perciformes | Lumpenidae             | <i>Acantholumpenus mackayi</i>    | UW 150276                                    | SAMN22935830 | ✓ |
| Perciformes | Lumpenidae             | <i>Anisarchus medius</i>          | UW 49373                                     | SAMN22935858 | ✓ |
| Perciformes | Lumpenidae             | <i>Anisarchus medius</i>          | UW 152055                                    | SAMN22936154 |   |
| Perciformes | Lumpenidae             | <i>Leptoclinus maculatus</i>      | UW 49369                                     | SAMN22936141 | ✓ |
| Perciformes | Lumpenidae             | <i>Leptoclinus maculatus</i>      | UW 151205                                    | SAMN22936153 | ✓ |
| Perciformes | Lumpenidae             | <i>Lumpenella longirostris</i>    | UW 151000                                    | SAMN22936152 | ✓ |
| Perciformes | Lumpenidae             | <i>Lumpenus sagitta</i>           | UW 150616                                    | SAMN22936155 | ✓ |
| Perciformes | Lumpenidae             | <i>Poroclinus rothrocki</i>       | UW 150577                                    | SAMN22936310 | ✓ |
| Perciformes |                        | <i>Zaprora silenus</i>            | UW 152655                                    | SAMN22936446 | ✓ |
| Perciformes |                        | <i>Zaprora silenus</i>            | UW 150107                                    | SAMN22936447 |   |
| Perciformes | Opisthocentridae       | <i>Askoldia variegata</i>         | UW 44508                                     | SAMN22935870 |   |
| Perciformes | Opisthocentridae       | <i>Opisthocentrus ocellatus</i>   | UW 44935                                     | SAMN22936242 | ✓ |
| Perciformes | Opisthocentridae       | <i>Opisthocentrus tenuis</i>      | UW 47877                                     | SAMN22936243 | ✓ |
| Perciformes | Opisthocentridae       | <i>Opisthocentrus zonope</i>      | UW 47885                                     | SAMN22936244 | ✓ |
| Perciformes | Opisthocentridae       | <i>Pholidapus dybowskii</i>       | UW 47882                                     | SAMN22936241 |   |
| Perciformes |                        | <i>Ptilichthys goodiei</i>        | Pers. Coll.:<br>P. Wainwright, PCW<br>2416   | SAMN22936330 | ✓ |
| Perciformes | Pholidae               | <i>Apodichthys flavidus</i>       | UW 151663                                    | SAMN22935867 | ✓ |
| Perciformes | Pholidae               | <i>Pholis clemensi</i>            | UW 47872                                     | SAMN22936291 |   |
| Perciformes | Pholidae               | <i>Pholis laeta</i>               | UW 43793                                     | SAMN22936292 |   |
| Perciformes | Pholidae               | <i>Pholis ornata</i>              | Pers. Coll.:<br>P. Wainwright, PW244:<br>B27 | SAMN22936293 | ✓ |

|                  |                   |                                      |                                  |              |     |
|------------------|-------------------|--------------------------------------|----------------------------------|--------------|-----|
| Perciformes      | Pholidae          | <i>Pholis ornata</i>                 | UW 151676                        | SAMN22936294 |     |
| Perciformes      | Pholidae          | <i>Rhodymenichthys dolichogaster</i> | UW 44516                         | SAMN22936340 | ✓   |
| Perciformes      |                   | <i>Gymnoclinus cristulatus</i>       | UW 44509                         | SAMN22936084 |     |
| Perciformes      | Neozoarcidae      | <i>Neozoarces steindachneri</i>      | UW 47875                         | SAMN22936227 |     |
| Perciformes      | Anarhichadidae    | <i>Anarhichas orientalis</i>         | UW 150194                        | SAMN22935855 | ✓   |
| Perciformes      | Anarhichadidae    | <i>Anarhichas orientalis</i>         | UW 111905                        | SAMN22935854 |     |
| Perciformes      | Anarhichadidae    | <i>Anarrhichthys ocellatus</i>       | UW 49014                         | SAMN22935856 |     |
| Perciformes      | Zoarcidae         | <i>Bothrocara brunneum</i>           | UW 150525                        | SAMN22935908 | ✓   |
| Perciformes      | Zoarcidae         | <i>Bothrocara molle</i>              | UW 111363                        | SAMN22935909 | ✓   |
| Perciformes      | Zoarcidae         | <i>Bothrocara pusillum</i>           | UW 151315                        | SAMN22935910 | ✓   |
| Perciformes      | Zoarcidae         | <i>Bothrocara zestum</i>             | UW 150975                        | SAMN22935911 |     |
| Perciformes      | Zoarcidae         | <i>Gymnelus viridis</i>              | UW 150119                        | SAMN22936083 | ✓   |
| Perciformes      | Zoarcidae         | <i>Lycenchelys camchatica</i>        | UW 119335                        | SAMN22936157 | ✓   |
| Perciformes      | Zoarcidae         | <i>Lycenchelys crotalinus</i>        | UW 118611                        | SAMN22936158 | ✓   |
| Perciformes      | Zoarcidae         | <i>Lycodapus fierasfer</i>           | UW 115137                        | SAMN22936159 | ✓   |
| Perciformes      | Zoarcidae         | <i>Lycodapus mandibularis</i>        | UW 152155                        | SAMN22936160 | ✓   |
| Perciformes      | Zoarcidae         | <i>Lycodes akuugun</i>               | UW 117198                        | SAMN22936161 |     |
| Perciformes      | Zoarcidae         | <i>Lycodes beringi</i>               | UW 150976                        | SAMN22936162 | ✓   |
| Perciformes      | Zoarcidae         | <i>Lycodes brevipes</i>              | UW 151235                        | SAMN22936163 | ✓   |
| Perciformes      | Zoarcidae         | <i>Lycodes concolor</i>              | UW 150529                        | SAMN22936164 | ✓   |
| Perciformes      | Zoarcidae         | <i>Lycodes cortezianus</i>           | UW 115164                        | SAMN22936165 | ✓   |
| Perciformes      | Zoarcidae         | <i>Lycodes diapterus</i>             | YFTC 13952, n.v.                 | SAMN22936166 | ✓   |
| Perciformes      | Zoarcidae         | <i>Lycodes diapterus</i>             | UW 119963                        | SAMN22936167 |     |
| Perciformes      | Zoarcidae         | <i>Lycodes mucosus</i>               | UW 152426                        | SAMN22936168 |     |
| Perciformes      | Zoarcidae         | <i>Lycodes pacificus</i>             | UW 119472                        | SAMN22936170 | ✓   |
| Perciformes      | Zoarcidae         | <i>Lycodes pacificus</i>             | UW 113585                        | SAMN22936169 |     |
| Perciformes      | Zoarcidae         | <i>Lycodes palearis</i>              | UW 152045                        | SAMN22936171 | ✓   |
| Perciformes      | Zoarcidae         | <i>Lycodes polaris</i>               | UW 152421                        | SAMN22936172 | ✓   |
| Perciformes      | Zoarcidae         | <i>Lycodes raridens</i>              | UW 152485                        | SAMN22936173 | ✓   |
| Perciformes      | Zoarcidae         | <i>Lycodes turneri</i>               | UW 150133                        | SAMN22936174 | ✓   |
| Perciformes      | Zoarcidae         | <i>Puzanovia rubra</i>               | UW 150349                        | SAMN22936332 |     |
| Perciformes      | Zoarcidae         | <i>Zoarces elongatus</i>             | UW 44917                         | SAMN22936452 | ✓   |
| Centrarchiformes | <i>Percalates</i> | <i>Percalates colonorum</i>          | Pers. Coll.: Peter<br>Unmack     | SAMN22936279 | ✓   |
| Centrarchiformes | Girellidae        | <i>Girella nigricans</i>             | Pers. Coll.: Giacomo<br>Bernardi | SAMN22936077 | ✓ ✓ |
| Centrarchiformes | Scorpididae       | <i>Medialuna californiensis</i>      | YFTC 21006, n.v.                 | SAMN22936190 | ✓   |
| Centrarchiformes | Scorpididae       | <i>Scorpis georgiana</i>             | Pers. Coll.: JP Hobbs            | SAMN22936367 | ✓   |
| Centrarchiformes | <i>Dichistius</i> | <i>Dichistius capensis</i>           | SAIAB 87252                      | SAMN22936022 |     |
| Centrarchiformes | <i>Dichistius</i> | <i>Dichistius multifasciatus</i>     | SAIAB 86789                      | SAMN22936023 |     |
| Centrarchiformes | Microcanthidae    | <i>Microcanthus strigatus</i>        | Pers. Coll.: JP Hobbs            | SAMN22936195 |     |



|                  |                       |                                     |                                              |               |   |
|------------------|-----------------------|-------------------------------------|----------------------------------------------|---------------|---|
| Centrarchiformes | Microcanthidae        | <i>Tilodon sexfasciatus</i>         | Pers. Coll.: JP Hobbs                        | SAMN22936413  |   |
| Centrarchiformes | <i>Oplegnathus</i>    | <i>Oplegnathus conwayi</i>          | SIO 05-48                                    | SAMN22936246  |   |
| Centrarchiformes | <i>Oplegnathus</i>    | <i>Oplegnathus fasciatus</i>        | See NCBI SRA                                 | SAMN07331350* | ✓ |
| Centrarchiformes | <i>Oplegnathus</i>    | <i>Oplegnathus peaolopesi</i>       | SAIAB 86857                                  | SAMN22936247  |   |
| Centrarchiformes | Kyphosidae            | <i>Kyphosus sectatrix</i>           | YPM ICH 024907                               | SAMN22936125  | ✓ |
| Centrarchiformes | Kyphosidae            | <i>Kyphosus vaigiensis</i>          | NMND 403373                                  | SAMN22936126  | ✓ |
| Centrarchiformes | <i>Kuhlia</i>         | <i>Kuhlia marginata</i>             | UF 162616                                    | SAMN22936122  | ✓ |
| Centrarchiformes | <i>Kuhlia</i>         | <i>Kuhlia rupestris</i>             | KUIT 5666, SAIAB<br>86171                    | SAMN22936123  | ✓ |
| Centrarchiformes | Terapontidae          | <i>Bidyanus bidyanus</i>            | Pers. Coll.: Peter<br>Unmack                 | SAMN22935904  | ✓ |
| Centrarchiformes | Terapontidae          | <i>Hephaestus fuliginosus</i>       | Pers. Coll.: Peter<br>Unmack                 | SAMN22936094  | ✓ |
| Centrarchiformes | Terapontidae          | <i>Scortum barcoo</i>               | Pers. Coll.: Peter<br>Unmack                 | SAMN22936368  |   |
| Centrarchiformes | Terapontidae          | <i>Terapon jarbua</i>               | Pers. Coll.: Peter<br>Unmack                 | SAMN22936408  | ✓ |
| Centrarchiformes |                       | <i>Enoplosus armatus</i>            | P. Wainwright, PW 3119<br>Pers. Coll.:       | SAMN22936048  | ✓ |
| Centrarchiformes | Percichthyidae        | <i>Maccullochella peelii</i>        | P. Wainwright, PW 1633<br>Pers. Coll.: Peter | SAMN22936176  | ✓ |
| Centrarchiformes | Percichthyidae        | <i>Nannoperca australis</i>         | Unmack<br>Pers. Coll.: Peter                 | SAMN22936219  |   |
| Centrarchiformes | Percichthyidae        | <i>Percilia gillissi</i>            | Unmack<br>Pers. Coll.: Peter                 | SAMN22936280  |   |
| Centrarchiformes | Percichthyidae        | <i>Percilia irwini</i>              | Unmack                                       | SAMN22936281  |   |
| Centrarchiformes | Sinipercidae          | <i>Coreoperca herzi</i>             | YPM ICH 026803                               | SAMN22935987  | ✓ |
| Centrarchiformes | Sinipercidae          | <i>Siniperca chuatzii</i>           | YPM ICH 023856<br>Pers. Coll.:               | SAMN22936381  | ✓ |
| Centrarchiformes | Centrarchidae         | <i>Elassoma okefenokee</i>          | P. Wainwright, PW667:<br>FL18                | SAMN22936040  | ✓ |
| Centrarchiformes | Centrarchidae         | <i>Elassoma zonatum</i>             | YPM ICH 021245                               | SAMN22936041  | ✓ |
| Centrarchiformes | Centrarchidae         | <i>Enneacanthus chaetodon</i>       | UF 236219                                    | SAMN22936046  | ✓ |
| Centrarchiformes | Centrarchidae         | <i>Micropterus salmoides</i>        | YPM ICH 023651<br>KUIT 224, USNM             | SAMN05915084  | ✓ |
| Centrarchiformes | Cirrhitidae           | <i>Amblycirrhitis pinos</i>         | 349043<br>KUIT 684, USNM                     | SAMN22935848  | ✓ |
| Centrarchiformes | Cirrhitidae           | <i>Cirrhitichthys falco</i>         | 334280                                       | SAMN22935983  | ✓ |
| Centrarchiformes | Latridae              | <i>Chirodactylus brachydactylus</i> | KUIT 6471                                    | SAMN22935975  | ✓ |
| Centrarchiformes | Latridae              | <i>Latridopsis fosteri</i>          | YFTC 24241, n.v.                             | SAMN22936135  |   |
| Centrarchiformes | Latridae              | <i>Latris lineata</i>               | SAMA ABTC 102988                             | SAMN22936136  |   |
| Centrarchiformes | <i>Chironemus</i>     | <i>Chironemus bicornis</i>          | FMNH 107336<br>Pers. Coll.: Chris            | SAMN22935979  | ✓ |
| Centrarchiformes | <i>Cheilodactylus</i> | <i>Cheilodactylus fasciatus</i>     | Burridge                                     | SRX5100538    | ✓ |
| Centrarchiformes | <i>Aplodactylus</i>   | <i>Aplodactylus arctidens</i>       | NMV A 24857<br>Pers. Coll.: Chris            | SAMN22935866  | ✓ |
| Centrarchiformes | <i>Aplodactylus</i>   | <i>Aplodactylus lophodon</i>        | Burridge                                     | SRR8285884    | ✓ |
| Labriformes      | Uranoscopidae         | <i>Astroscoptes y graecum</i>       | KUIT 16, KUI 22957                           | SAMN22935873  | ✓ |
| Labriformes      | Uranoscopidae         | <i>Kathetostoma averruncus</i>      | KUIT 464, KUI 28152<br>Pers. Coll.:          | SAMN22936121  | ✓ |
| Labriformes      | Ammodytidae           | <i>Ammodytes hexapterus</i>         | P. Wainwright, PW2451                        | SAMN22935851  | ✓ |

|             |               |                                |                                             |               |   |   |
|-------------|---------------|--------------------------------|---------------------------------------------|---------------|---|---|
| Labriformes | Pinguipedidae | <i>Parapercis hexoptalma</i>   | KUIT 6766, SAIAB<br>77885                   | SAMN22936266  | ✓ | ✓ |
| Labriformes |               | <i>Cheimarrichthys fosteri</i> | See NCBI SRA                                | SAMN05915051  | ✓ |   |
| Labriformes | Leptoscopidae | <i>Crapatalus munroi</i>       | CSIRO H 7106-01                             | SAMN22935993  |   |   |
| Labriformes | Leptoscopidae | <i>Lesueurina platycephala</i> | CSIRO H 7106-03                             | SAMN22936143  |   |   |
| Labriformes |               | <i>Centrogenys vaigiensis</i>  | LSUMZ 16511                                 | SAMN22935941  | ✓ |   |
| Labriformes |               | <i>Centrogenys vaigiensis</i>  | LSUMZ 16559                                 | SAMN22935942  |   | ✓ |
| Labriformes |               | <i>Centrogenys vaigiensis</i>  | LSUMZ 16559                                 | SAMN22935942  |   |   |
| Labriformes | Labridae      | <i>Achoerodus viridis</i>      | Pers. Coll.: D.Bellwood<br>M507, n.v.       | SAMN22935838  |   |   |
| Labriformes | Labridae      | <i>Bodianus rufus</i>          | Pers. Coll.: D.Bellwood<br>M383, n.v.       | SAMN22935906  |   |   |
| Labriformes | Labridae      | <i>Bolbometopon muricatum</i>  | Pers. Coll.: D.Bellwood<br>Choat_SIO1, n.v. | SAMN22935907  | ✓ |   |
| Labriformes | Labridae      | <i>Calotomus spinidens</i>     | Pers. Coll.: H.Choat<br>G2118, n.v.         | SAMN22935923  | ✓ |   |
| Labriformes | Labridae      | <i>Cetoscarus bicolor</i>      | Pers. Coll.: H.Choat<br>G113, n.v.          | SAMN22935947  | ✓ |   |
| Labriformes | Labridae      | <i>Cheilinus fasciatus</i>     | Pers. Coll.: D.Bellwood<br>M215, n.v.       | SAMN22935967  | ✓ |   |
| Labriformes | Labridae      | <i>Cheilio inermis</i>         | Pers. Coll.: D.Bellwood<br>M1187, n.v.      | SAMN22935968  | ✓ |   |
| Labriformes | Labridae      | <i>Chlorurus japanensis</i>    | Pers. Coll.: H.Choat<br>PFC5870, n.v.       | SAMN22935980  | ✓ |   |
| Labriformes | Labridae      | <i>Choerodon anchorago</i>     | Pers. Coll.: D.Bellwood<br>M12, n.v.        | SAMN22935981  | ✓ |   |
| Labriformes | Labridae      | <i>Coris atlantica</i>         | Pers. Coll.: D.Bellwood<br>M1692, n.v.      | SAMN22935988  |   |   |
| Labriformes | Labridae      | <i>Coris gaimard</i>           | Pers. Coll.: D.Bellwood<br>M1359, n.v.      | SAMN22935989  | ✓ |   |
| Labriformes | Labridae      | <i>Epibulus insidiator</i>     | Pers. Coll.:<br>P.Wainwright, PW1897B       | SAMN05915062  | ✓ |   |
| Labriformes | Labridae      | <i>Halichoeres poeyi</i>       | Pers. Coll.: P.Wainwright,<br>PW46          | SAMN05915071  | ✓ |   |
| Labriformes | Labridae      | <i>Halichoeres radiatus</i>    | CAS HRA01                                   | SAMN05915072  | ✓ |   |
| Labriformes | Labridae      | <i>Heteroscarus acroptilus</i> | Pers. Coll.: D.Bellwood<br>M492, n.v.       | SAMN22936236  |   |   |
| Labriformes | Labridae      | <i>Hipposcarus harid</i>       | Pers. Coll.: H.Choat<br>PFC6379, n.v.       | SAMN22936102  | ✓ |   |
| Labriformes | Labridae      | <i>Labrichthys unilineatus</i> | Pers. Coll.: D.Bellwood<br>M254, n.v.       | SAMN22936128  | ✓ |   |
| Labriformes | Labridae      | <i>Labrus bergylta</i>         | See NCBI SRA                                | SAMEA3939555* | ✓ |   |
| Labriformes | Labridae      | <i>Lachnolaimus maximus</i>    | Pers. Coll.: D.Bellwood<br>M397, n.v.       | SAMN22936129  | ✓ | ✓ |
| Labriformes | Labridae      | <i>Pseudodax moluccanus</i>    | Pers. Coll.: D.Bellwood<br>M62, n.v.        | SAMN22936322  | ✓ |   |
| Labriformes | Labridae      | <i>Scarus flavipectoralis</i>  | Pers. Coll.: H.Choat<br>G228, n.v.          | SAMN22936352  | ✓ |   |
| Labriformes | Labridae      | <i>Scarus taeniopterus</i>     | Pers. Coll.: H.Choat<br>G754, n.v.          | SAMN22936353  | ✓ | ✓ |
| Labriformes | Labridae      | <i>Sparisoma radians</i>       | Pers. Coll.: H.Choat<br>A10, n.v.           | SAMN22936383  | ✓ |   |
| Labriformes | Labridae      | <i>Symphodus melops</i>        | See NCBI SRA                                | SAMEA4028821* | ✓ |   |
| Labriformes | Labridae      | <i>Thalassoma ballieui</i>     | CAS TBA-04                                  | SAMN05915134  | ✓ |   |
| Labriformes | Labridae      | <i>Wetmorella albofasciata</i> | Pers. Coll.: D.Bellwood<br>M288, n.v.       | SAMN22936439  | ✓ |   |

|                  |                      |                                  |                                                 |               |     |
|------------------|----------------------|----------------------------------|-------------------------------------------------|---------------|-----|
| Acropomatiformes | <i>Ostracoberyx</i>  | <i>Ostracoberyx dorygenys</i>    | ASIZPO 911526                                   | SAMN22936253  |     |
| Acropomatiformes | Acropomatidae        | <i>Acropoma japonica</i>         | YPM ICH 010066                                  | SAMN22935840  | ✓   |
| Acropomatiformes | Acropomatidae        | <i>Doederleinia berycoides</i>   | NMV Z 6813                                      | SAMN22936033  |     |
| Acropomatiformes | <i>Scombrops</i>     | <i>Scombrops boops</i>           | YFTC 24186, n.v.                                | SAMN22936360  |     |
| Acropomatiformes | <i>Scombrops</i>     | <i>Scombrops gilberti</i>        | YFTC 24191, n.v.                                | SAMN22936361  |     |
| Acropomatiformes | <i>Scombrops</i>     | <i>Scombrops gilberti</i>        | YFTC 24192, n.v.                                | SAMN22936362  |     |
| Acropomatiformes | <i>Scombrops</i>     | <i>Scombrops gilberti</i>        | YFTC 24193, n.v.                                | SAMN22936363  |     |
| Acropomatiformes | <i>Symphysanodon</i> | <i>Symphysanodon berryi</i>      | YPM ICH 028303                                  | SAMN22936402  | ✓   |
| Acropomatiformes | <i>Symphysanodon</i> | <i>Symphysanodon octoactinus</i> | USNM 406214                                     | SAMN22936403  | ✓   |
| Acropomatiformes | Epigonidae           | <i>Brinkmannella carpenteri</i>  | YPM ICH 028297                                  | SAMN22935915  |     |
| Acropomatiformes | Howellidae           | <i>Howella atlantica</i>         | YPM ICH 028408                                  | SAMN22936108  |     |
| Acropomatiformes | Howellidae           | <i>Howella brodiei</i>           | YPM ICH 027798                                  | SAMN22936109  |     |
| Acropomatiformes | <i>Polyprion</i>     | <i>Polyprion americanus</i>      | AMS I.42844-002                                 | SAMN22936307  | ✓   |
| Acropomatiformes | <i>Glaucosoma</i>    | <i>Glaucosoma hebraicum</i>      | YFTC 18186, n.v.                                | SAMN22936078  |     |
| Acropomatiformes | Pempheridae          | <i>Pempheris schomburgkii</i>    | YPM ICH 24903                                   | SAMN05915096  | ✓   |
| Acropomatiformes | <i>Lateolabrax</i>   | <i>Lateolabrax japonicus</i>     | YFTC 25777, n.v.                                | SAMN22936133  | ✓   |
| Acropomatiformes | <i>Lateolabrax</i>   | <i>Lateolabrax japonicus</i>     | See NCBI SRA                                    | SAMN07680090* |     |
| Acropomatiformes | <i>Lateolabrax</i>   | <i>Lateolabrax latus</i>         | KAUM 51068                                      | SAMN22936134  |     |
| Acropomatiformes | <i>Stereolepis</i>   | <i>Stereolepis gigas</i>         | SIO 03-74                                       | SAMN22936395  | ✓   |
| Acropomatiformes | <i>Banjos</i>        | <i>Banjos banjos</i>             | ASIZPO 801399                                   | SAMN22935886  | ✓   |
| Acropomatiformes | Pentacerotidae       | <i>Pentaceros japonicus</i>      | ASIZD 0800699                                   | SAMN22936277  |     |
| Acropomatiformes | Pentacerotidae       | <i>Pseudopentaceros wheeleri</i> | UW 116954                                       | SAMN22936324  |     |
| Acropomatiformes | Bathyclupeidae       | <i>Neobathyclupea argentea</i>   | YPM ICH 028270                                  | SAMN22935889  |     |
| Acropomatiformes | Bathyclupeidae       | <i>Neobathyclupea gracilis</i>   | NMV A 25118-003                                 | SAMN22935890  |     |
| Acropomatiformes | <i>Champsodon</i>    | <i>Champsodon sechellensis</i>   | SAIAB 84026                                     | SAMN22935951  |     |
| Acropomatiformes | <i>Champsodon</i>    | <i>Champsodon snyderi</i>        | ASIZPO 910951                                   | SAMN22935952  |     |
| Acropomatiformes | Creediidae           | <i>Limnichthys</i> sp.           | KUIT 782                                        | SAMN22936145  |     |
| Acropomatiformes | Creediidae           | <i>Tewara cranwellae</i>         | NMNZ P.044479/TS1                               | SAMN22936411  |     |
| Acropomatiformes | Hemerocoetidae       | <i>Enigmapercis</i> sp.          | NSMT-P 114722                                   | SAMN22936045  | ✓   |
| Acropomatiformes | Hemerocoetidae       | <i>Osopsaron formosensis</i>     | NSMT-P 77318                                    | SAMN22936250  | ✓   |
| Acropomatiformes | Hemerocoetidae       | <i>Pteropsaron evolans</i>       | NSMT-P 77317                                    | SAMN22936328  |     |
| Euperciformes    | Gerreidae            | <i>Eucinostomus jonesii</i>      | YPM ICH 24864                                   | SAMN22936063  | ✓ ✓ |
| Euperciformes    | Gerreidae            | <i>Gerres cinereus</i>           | YPM ICH 24843                                   | SAMN22936072  | ✓   |
| Euperciformes    | Moronidae            | <i>Dicentrarchus labrax</i>      | Pers. Coll.: F.J. Sanchez Vazques, U. of Murica | SAMN22936019  | ✓   |
| Euperciformes    | Moronidae            | <i>Morone saxatilis</i>          | YPM ICH 018448                                  | SAMN22936210  | ✓   |
| Euperciformes    | Sillaginidae         | <i>Sillago chondropus</i>        | Pers. Coll.: W.L.Smith<br>KUIT 6745, SAIAB      | SAMN22936379  |     |
| Euperciformes    | Sillaginidae         | <i>Sillago sihama</i>            | 77085                                           | SAMN22936380  | ✓   |
| Euperciformes    | <i>Drepane</i>       | <i>Drepane punctata</i>          | ROM 69918<br>KUIT 7072, SAIAB                   | SAMN22936036  | ✓   |
| Euperciformes    | Ehippididae          | <i>Platax orbicularis</i>        | 77666                                           | SAMN22936297  | ✓   |

|               |                 |                                   |                                                                   |               |   |   |
|---------------|-----------------|-----------------------------------|-------------------------------------------------------------------|---------------|---|---|
| Euperciformes | Dinopercidae    | <i>Dinoperca petersi</i>          | SAIAB 81789                                                       | SAMN22936026  | ✓ |   |
| Euperciformes | Haemulidae      | <i>Haemulon album</i>             | CAS HAL01                                                         | SAMN05915068  | ✓ |   |
| Euperciformes | Haemulidae      | <i>Haemulon flavolineatum</i>     | CAS HFG04                                                         | SAMN05915069  | ✓ |   |
| Euperciformes | Haemulidae      | <i>Haemulon parra</i>             | CAS HPA01                                                         | SAMN05915070  | ✓ |   |
| Euperciformes | Sciaenidae      | <i>Collichthys lucidus</i>        | See NCBI SRA                                                      | SAMN10225518* | ✓ |   |
| Euperciformes | Sciaenidae      | <i>Larimichthys crocea</i>        | See NCBI SRA                                                      | SAMN10434301* | ✓ |   |
| Euperciformes | Sciaenidae      | <i>Micropogonias undulatus</i>    | YPM ICH 023546                                                    | SAMN05915083  | ✓ |   |
| Euperciformes | Sciaenidae      | <i>Miichthys miuy</i>             | See NCBI SRA                                                      | SAMN02486174* | ✓ |   |
| Euperciformes | Sciaenidae      | <i>Nibea albiflora</i>            | See NCBI SRA                                                      | SAMEA1067819* | ✓ |   |
| Euperciformes | Sciaenidae      | <i>Pareques acuminatus</i>        | CAS PAC20                                                         | SAMN05915094  | ✓ |   |
| Euperciformes | Monodactylidae  | <i>Monodactylus sebae</i>         | YPM ICH 020540                                                    | SAMN22936205  | ✓ |   |
| Euperciformes | Lobotidae       | <i>Hapalogenys dampieriensis</i>  | NMV Z 6535                                                        | SAMN22936086  | ✓ |   |
| Euperciformes | Lobotidae       | <i>Lobotes surinamensis</i>       | Pers. Coll.:<br>P.Wainwright, PW2610<br>KUIT 7270, SAIAB<br>99238 | SAMN22936148  | ✓ |   |
| Euperciformes | Emmelichthyidae | <i>Erythrocles schlegelii</i>     | CAS LGO01                                                         | SAMN22936053  | ✓ |   |
| Euperciformes | Lutjanidae      | <i>Lutjanus goreensis</i>         | CAS LGO01                                                         | SAMN05915081  | ✓ |   |
| Euperciformes | Malacanthidae   | <i>Caulolatilus princeps</i>      | SIO 08-66                                                         | SAMN22935937  | ✓ |   |
| Euperciformes | Malacanthidae   | <i>Malacanthus plumieri</i>       | Pers. Coll.:<br>P.Wainwright, PW1198                              | SAMN22936182  | ✓ |   |
| Euperciformes | Pomacanthidae   | <i>Centropyge flavissima</i>      | YPM ICH 026532                                                    | SAMN22935944  | ✓ |   |
| Euperciformes | Pomacanthidae   | <i>Chaetodontoplus melanosoma</i> | Pers. Coll.:<br>P.Wainwright, PW643<br>Pers. Coll.:               | SAMN22935950  | ✓ | ✓ |
| Euperciformes | Pomacanthidae   | <i>Holacanthus passer</i>         | P.Wainwright, PW642                                               | SAMN22936104  | ✓ | ✓ |
| Euperciformes | Pomacanthidae   | <i>Pomacanthus paru</i>           | CAS PPA01                                                         | SAMN05915105  | ✓ |   |
| Euperciformes | Leiognathidae   | <i>Gazza minuta</i>               | YFTC 18187, n.v.                                                  | SAMN22936071  | ✓ | ✓ |
| Euperciformes | Leiognathidae   | <i>Karalla daura</i>              | LSUMZ 8791                                                        | SAMN22936120  | ✓ |   |
| Euperciformes | Leiognathidae   | <i>Leiognathus equula</i>         | LSUMZ 8683                                                        | SAMN22936137  | ✓ | ✓ |
| Euperciformes | Leiognathidae   | <i>Secutor nuconius</i>           | LSUMZ 8682                                                        | SAMN22936370  | ✓ |   |
| Euperciformes | Chaetodontidae  | <i>Chaetodon kleinii</i>          | Pers. Coll.:<br>P.Wainwright, PW2291B                             | SAMN05915049  | ✓ |   |
| Euperciformes | Chaetodontidae  | <i>Chaetodon leucopleura</i>      | See NCBI SRA                                                      | SAMN09765312  | ✓ |   |
| Euperciformes | Chaetodontidae  | <i>Chaetodon melapterus</i>       | See NCBI SRA                                                      | SAMN09765325  | ✓ |   |
| Euperciformes | Chaetodontidae  | <i>Chaetodon ocellatus</i>        | CAS CAC01                                                         | SAMN05915050  | ✓ |   |
| Euperciformes | Chaetodontidae  | <i>Chaetodon trichrous</i>        | See NCBI SRA                                                      | SAMN09765350  | ✓ | ✓ |
| Euperciformes | Chaetodontidae  | <i>Chaetodon trifascialis</i>     | See NCBI SRA                                                      | SAMN09765353  | ✓ |   |
| Euperciformes | Chaetodontidae  | <i>Chaetodon unimaculatus</i>     | See NCBI SRA                                                      | SAMN09765358  | ✓ |   |
| Euperciformes | Chaetodontidae  | <i>Chaetodon vagabundus</i>       | See NCBI SRA                                                      | SAMN09765361  | ✓ |   |
| Euperciformes | Chaetodontidae  | <i>Chaetodon xanthurus</i>        | See NCBI SRA                                                      | SAMN09765364  | ✓ |   |
| Euperciformes | Chaetodontidae  | <i>Forcipiger longirostris</i>    | See NCBI SRA                                                      | SAMN09765373  | ✓ | ✓ |
| Euperciformes | Chaetodontidae  | <i>Heniochus acuminatus</i>       | See NCBI SRA                                                      | SAMN09765375  | ✓ |   |
| Euperciformes | Chaetodontidae  | <i>Heniochus diphreutes</i>       | See NCBI SRA                                                      | SAMN09765376  | ✓ |   |
| Euperciformes | Chaetodontidae  | <i>Prognathodes aculeatus</i>     | See NCBI SRA                                                      | SAMN09765385  | ✓ | ✓ |

|               |                |                                |                                             |               |   |
|---------------|----------------|--------------------------------|---------------------------------------------|---------------|---|
| Euperciformes | Chaetodontidae | <i>Prognathodes marcellae</i>  | See NCBI SRA<br>KUIT 3882, MCZ              | SAMN09765386  | ✓ |
| Euperciformes |                | <i>Luvarus imperialis</i>      | 159566                                      | SAMN22936156  | ✓ |
| Euperciformes |                | <i>Zanclus cornutus</i>        | Pers. Coll.:<br>P.Wainwright, PW1782B       | SAMN22936443  | ✓ |
| Euperciformes | Acanthuridae   | <i>Acanthurus bahianus</i>     | ANSP 191513                                 | SAMN05915021  | ✓ |
| Euperciformes | Acanthuridae   | <i>Acanthurus bariene</i>      | Pers. Coll.: M.Alfaro,<br>Alfaro-909        | SAMN05915022  |   |
| Euperciformes | Acanthuridae   | <i>Acanthurus chirurgus</i>    | Pers. Coll.: D.Bellwood<br>M1523, n.v.      | SAMN22935832  | ✓ |
| Euperciformes | Acanthuridae   | <i>Acanthurus coeruleus</i>    | Pers. Coll.: D.Bellwood<br>M284, n.v.       | SAMN22935833  | ✓ |
| Euperciformes | Acanthuridae   | <i>Acanthurus lineatus</i>     | Pers. Coll.: D.Bellwood<br>M579, n.v.       | SAMN22935834  | ✓ |
| Euperciformes | Acanthuridae   | <i>Acanthurus nigricans</i>    | Pers. Coll.: D.Bellwood<br>M309, n.v.       | SAMN22935835  | ✓ |
| Euperciformes | Acanthuridae   | <i>Acanthurus nigrofuscus</i>  | Pers. Coll.: D.Bellwood<br>M1452, n.v.      | SAMN22935836  | ✓ |
| Euperciformes | Acanthuridae   | <i>Acanthurus olivaceus</i>    | Pers. Coll.: M.Alfaro,<br>Alfaro-878        | SAMN05915023  | ✓ |
| Euperciformes | Acanthuridae   | <i>Acanthurus pyroferus</i>    | Pers. Coll.: M.Alfaro,<br>Alfaro-907        | SAMN05915024  | ✓ |
| Euperciformes | Acanthuridae   | <i>Acanthurus triostegus</i>   | Pers. Coll.: D.Bellwood<br>M677, n.v.       | SAMN22935837  | ✓ |
| Euperciformes | Acanthuridae   | <i>Ctenochaetus striatus</i>   | Pers. Coll.: D.Bellwood<br>M747, n.v.       | SAMN22935998  | ✓ |
| Euperciformes | Acanthuridae   | <i>Ctenochaetus truncatus</i>  | Pers. Coll.: D.Bellwood<br>M310, n.v.       | SAMN22935999  |   |
| Euperciformes | Acanthuridae   | <i>Naso elegans</i>            | Pers. Coll.: D.Bellwood<br>M1206, n.v.      | SAMN22936220  |   |
| Euperciformes | Acanthuridae   | <i>Naso unicornis</i>          | Pers. Coll.: M.Alfaro,<br>Alfaro-mv010.12   | SAMN05915088  | ✓ |
| Euperciformes | Acanthuridae   | <i>Paracanthurus hepatus</i>   | Pers. Coll.: D.Bellwood<br>M1432, n.v.      | SAMN22936260  | ✓ |
| Euperciformes | Acanthuridae   | <i>Prionurus biafraensis</i>   | Pers. Coll.: D.Bellwood<br>M1695, n.v.      | SAMN22936316  | ✓ |
| Euperciformes | Acanthuridae   | <i>Zebrasoma desjardini</i>    | Pers. Coll.: D.Bellwood<br>M1454, n.v.      | SAMN22936448  |   |
| Euperciformes | Acanthuridae   | <i>Zebrasoma flavescens</i>    | Pers. Coll.: D.Bellwood<br>M2031, n.v.      | SAMN22936449  | ✓ |
| Euperciformes | Acanthuridae   | <i>Zebrasoma rostratum</i>     | Pers. Coll.: D.Bellwood<br>M2030, n.v.      | SAMN22936450  |   |
| Euperciformes | Callanthiidae  | <i>Callanthias australis</i>   | NMNZ P.052282/TS2                           | SAMN22935922  |   |
| Euperciformes | Nemipteridae   | <i>Parascalopsis eriomma</i>   | SAIAB 80609                                 | SAMN22936268  | ✓ |
| Euperciformes | Nemipteridae   | <i>Scolopsis ghanam</i>        | SAIAB 80378                                 | SAMN22936355  |   |
| Euperciformes | Nemipteridae   | <i>Scolopsis vosmeri</i>       | SAIAB 80713                                 | SAMN22936356  | ✓ |
| Euperciformes | Lethrinidae    | <i>Lethrinus erythropterus</i> | Pers. Coll.:<br>P.Wainwright, PW2049B       | SAMN22936144  | ✓ |
| Euperciformes | Lethrinidae    | <i>Monotaxis grandoculis</i>   | Pers. Coll.:<br>P.Wainwright, PW2159B       | SAMN22936208  | ✓ |
| Euperciformes | Sparidae       | <i>Calamus calamus</i>         | Pers. Coll.:<br>P.Wainwright, PW102:<br>960 | SAMN22935921  | ✓ |
| Euperciformes | Sparidae       | <i>Pagrus major</i>            | See NCBI SRA                                | SAMD00076252* | ✓ |
| Euperciformes | Sparidae       | <i>Sparus aurata</i>           | See NCBI SRA                                | SAMN09603368* | ✓ |
| Euperciformes | Sparidae       | <i>Spicara australis</i>       | SAIAB 81795                                 | SAMN22936389  |   |
| Euperciformes | Sparidae       | <i>Spicara smaris</i>          | SAIAB 81064                                 | SAMN22936390  | ✓ |

|                   |                    |                                    |                                                                                                                                     |               |     |
|-------------------|--------------------|------------------------------------|-------------------------------------------------------------------------------------------------------------------------------------|---------------|-----|
| Euperciformes     | Sparidae           | <i>Spondyllosoma cantharus</i>     | See NCBI SRA                                                                                                                        | SAMEA4028822* | ✓   |
| Euperciformes     | Sparidae           | <i>Stenotomus chrysops</i>         | YPM ICH 017360                                                                                                                      | SAMN22936394  |     |
| Euperciformes     | <i>Siganus</i>     | <i>Siganus spinus</i>              | KUIT 4159<br>Pers. Coll.:                                                                                                           | SAMN22936377  | ✓   |
| Euperciformes     | <i>Siganus</i>     | <i>Siganus vulpinus</i>            | P.Wainwright, PW1601                                                                                                                | SAMN22936378  | ✓   |
| Euperciformes     | Scatophagidae      | <i>Scatophagus argus</i>           | YPM ICH 020538                                                                                                                      | SAMN22936354  | ✓   |
| Euperciformes     | Priacanthidae      | <i>Priacanthus arenatus</i>        | KUIT 1132, KUI 27012                                                                                                                | SAMN22936314  | ✓   |
| Euperciformes     | Cepolidae          | <i>Cepola schlegelii</i>           | ASIZPO 800615                                                                                                                       | SAMN22935946  | ✓   |
| Euperciformes     | Cepolidae          | <i>Owstonia tosaensis</i>          | ASIZPO 801455                                                                                                                       | SAMN22936254  |     |
| Euperciformes     | Caproidae          | <i>Antigonia capros</i>            | YPM ICH 25915                                                                                                                       | SAMN05915030  | ✓   |
| Tetraodontiformes |                    | <i>Triodon macropterus</i>         | Pers. Coll.: W.L. Smith<br>Pers. Coll.:                                                                                             | SAMN22936434  |     |
| Tetraodontiformes | Aracnidae          | <i>Aracana aurita</i>              | P.Wainwright, PW1285                                                                                                                | SAMN22935868  | ✓   |
| Tetraodontiformes | Ostraciidae        | <i>Lactophrys bicaudalis</i>       | YPM ICH 24800                                                                                                                       | SAMN22936131  | ✓   |
| Tetraodontiformes | Triacanthodidae    | <i>Triacanthodes ethiops</i>       | SAIAB 82125                                                                                                                         | SAMN22936419  | ✓   |
| Tetraodontiformes | Triacanthidae      | <i>Triacanthus biaculeatus</i>     | NSMT 59287<br>Pers. Coll.:                                                                                                          | SAMN22936420  | ✓   |
| Tetraodontiformes | Balistidae         | <i>Balistes capriscus</i>          | P.Wainwright, PW2623<br>Pers. Coll.:                                                                                                | SAMN05915036  | ✓   |
| Tetraodontiformes | Monacanthidae      | <i>Acreichthys tomentosus</i>      | P.Wainwright, PW1740B                                                                                                               | SAMN22935839  |     |
| Tetraodontiformes | Monacanthidae      | <i>Aluterus monoceros</i>          | YPM ICH 027566                                                                                                                      | SAMN22935846  | ✓   |
| Tetraodontiformes | Molidae            | <i>Masturus lanceolatus</i>        | KUIT 5252, n.v.                                                                                                                     | SAMN22936189  |     |
| Tetraodontiformes | Molidae            | <i>Mola mola</i>                   | YFTC 13718<br>Pers. Coll.:                                                                                                          | SAMN22936202  |     |
| Tetraodontiformes | Diodontidae        | <i>Chilomycterus schoepfi</i>      | P.Wainwright, PW1225                                                                                                                | SAMN22935973  | ✓   |
| Tetraodontiformes | Diodontidae        | <i>Cylichthys orbicularis</i>      | SAIAB 190092<br>KUIT 7189, SAIAB                                                                                                    | SAMN22936010  |     |
| Tetraodontiformes | Diodontidae        | <i>Diodon liturosus</i>            | 78248<br>Pers. Coll.: M.Alfaro,<br>Alfaro-491                                                                                       | SAMN22936027  | ✓ ✓ |
| Tetraodontiformes | Tetraodontidae     | <i>Canthigaster figueiredoi</i>    |                                                                                                                                     | SAMN05915041  | ✓   |
| Tetraodontiformes | Tetraodontidae     | <i>Canthigaster margaritata</i>    | CAS LR03                                                                                                                            | SAMN05915042  |     |
| Tetraodontiformes | Tetraodontidae     | <i>Canthigaster rostrata</i>       | CAS CRO42                                                                                                                           | SAMN05915043  | ✓   |
| Tetraodontiformes | Tetraodontidae     | <i>Dichotomyctere nigroviridis</i> | See NCBI SRA<br>Pers. Coll.: M.Alfaro,<br>Alfaro-666                                                                                | SAMEA3138311* |     |
| Tetraodontiformes | Tetraodontidae     | <i>Pao suvattii</i>                |                                                                                                                                     | SAMN05915133  |     |
| Tetraodontiformes | Tetraodontidae     | <i>Takifugu bimaculatus</i>        | See NCBI SRA                                                                                                                        | SAMN10524747* | ✓   |
| Tetraodontiformes | Tetraodontidae     | <i>Takifugu flavidus</i>           | See NCBI SRA                                                                                                                        | SAMN10077091* |     |
| Tetraodontiformes | Tetraodontidae     | <i>Takifugu rubripes</i>           | See NCBI SRA<br>Pers. Coll.: J.Moore,<br>JAM99-109<br>Pers. Coll.: M.Alfaro,<br>Alfaro-1152<br>Pers. Coll.: M.Alfaro,<br>Alfaro-961 | SAMEA3138310* | ✓   |
| Lophiiformes      | Lophiidae          | <i>Lophius gastrophysus</i>        |                                                                                                                                     | SAMN22936149  | ✓   |
| Lophiiformes      | Ogcocephalidae     | <i>Ogcocephalus radiatus</i>       |                                                                                                                                     | SAMN05915090  | ✓   |
| Lophiiformes      | Antennariidae      | <i>Antennarius striatus</i>        |                                                                                                                                     | SAMN05915029  | ✓   |
| Lophiiformes      | Antennariidae      | <i>Antennarius striatus</i>        | See NCBI SRA                                                                                                                        | SAMEA4028823* |     |
| Lophiiformes      | Brachionichthyidae | <i>Brachionichthys australis</i>   | CSIRO H 4465-01                                                                                                                     | SAMN22935913  |     |
| Lophiiformes      | Tetrabrachiidae    | <i>Tetrabrachium ocellatum</i>     | UW A50                                                                                                                              | SAMN22936409  | ✓   |
| Lophiiformes      | Tetrabrachiidae    | <i>Tetrabrachium ocellatum</i>     | UW A67                                                                                                                              | SAMN22936410  |     |

|              |                 |                                 |                          |              |   |
|--------------|-----------------|---------------------------------|--------------------------|--------------|---|
| Lophiiformes | Chaunacidae     | <i>Chaunax stigmaeus</i>        | KUIT 8225, MCZ<br>166061 | SAMN22935965 |   |
| Lophiiformes | Chaunacidae     | <i>Chaunax suttkusi</i>         | KUIT 8159, MCZ<br>166070 | SAMN22935966 | ✓ |
| Lophiiformes | Chaunacidae     | <i>Chaunax</i> sp.              | UW 25870                 | SAMN22935964 |   |
| Lophiiformes | Caulophrynidae  | <i>Caulophryne pelagica</i>     | NMNZ P.043296/TS3        | SAMN22935938 |   |
| Lophiiformes | Gigantactinidae | <i>Gigantactis ios</i>          | MCZ 163303               | SAMN22936074 |   |
| Lophiiformes | Gigantactinidae | <i>Gigantactis vanhoeffeni</i>  | YPM ICH 027791           | SAMN22936075 |   |
| Lophiiformes |                 | <i>Neoceratias spinifer</i>     | UW D17                   | SAMN22936222 |   |
| Lophiiformes | Linophrynidae   | <i>Haplophryne mollis</i>       | NMNZ P.041209/TS3        | SAMN22936087 |   |
| Lophiiformes | Ceratiidae      | <i>Cryptopsaras couesii</i>     | YPM ICH 25702            | SAMN05915058 | ✓ |
| Lophiiformes | Oneirodidae     | <i>Chaenophryne longiceps</i>   | YPM ICH 25647            | SAMN22935949 |   |
| Lophiiformes | Oneirodidae     | <i>Dolopichthys karsteni</i>    | KUIT 5926, MCZ<br>165969 | SAMN22936034 |   |
| Lophiiformes | Oneirodidae     | <i>Lasiognathus intermedius</i> | YPM ICH 25927            | SAMN22936132 |   |
| Lophiiformes | Diceratiidae    | <i>Bufoeratias thele</i>        | UW D6                    | SAMN22935919 |   |
| Lophiiformes | Diceratiidae    | <i>Diceratias pileatus</i>      | UW D7                    | SAMN22936020 |   |
| Lophiiformes | Diceratiidae    | <i>Diceratias</i> sp.           | UW D27                   | SAMN22936021 |   |
| Lophiiformes | Himantolophidae | <i>Himantolophus albinares</i>  | KUIT 5264, MCZ<br>161521 | SAMN22936097 |   |
| Lophiiformes | Himantolophidae | <i>Himantolophus sagamius</i>   | SIO 02-2                 | SAMN22936098 |   |
| Lophiiformes | Melanocetidae   | <i>Melanocetus johnsonii</i>    | UW 115879                | SAMN22936192 | ✓ |
| Lophiiformes | Melanocetidae   | <i>Melanocetus murrayi</i>      | YPM ICH 027583           | SAMN22936193 | ✓ |

Institutional Abbreviations: AMNH, American Museum of Natural History, New York; AMS, Australian Museum, Sydney; ANSP, Academy of Natural Sciences, Philadelphia; ASIZ, Academia Sinica, Biodiversity Research Museum, Taipei; CAS, California Academy of Sciences, San Francisco; CBM, Natural History Museum and Institute, Chiba; CSIRO, Commonwealth Scientific and Industrial Research Organisation, Division of Marine and Atmospheric Research, Australian National Fish Collection, Hobart; CUMV, Cornell University Museum of Vertebrates, Ithaca; FAKU, Kyoto University Museum, Kyoto University, Yoshida, Sakyo; FMNH, Field Museum of Natural History, Chicago; FRLM, Fish Collection of the Fisheries Research Laboratory, Mie University, Wagu, Shima; HUMZ, The Hokkaido University Museum, Sapporo; INHS, Illinois Natural History Survey, Champaign; KAUM, Kagoshima University Museum, Korimoto; KUI, University of Kansas Biodiversity Institute, Lawrence; KUIT University of Kansas Biodiversity Institute Ichthyology Tissue Collection, Lawrence; LACM, Natural History Museum of Los Angeles County, Los Angeles; LBP, Laboratório de Biologia e Genética de Peixes, Departamento de Morfologia, Universidade Estadual Paulista “Júlio de Mesquita Filho”, Campus de Rio Claro, São Paulo; LSUMZ, Louisiana Museum of Natural History, Baton Rouge; MCZ, Museum of Comparative Zoology, Harvard University, Cambridge, Massachusetts; MNCN, Museo Nacional de Ciencias Naturales (CSIC), Madrid; MNHN, Museo Nacional de Historia Natural,

Zoología, Santiago; NCSM, North Carolina Museum of Natural Sciences, Raleigh; NMND, National Museum of Natural History, New Delhi; NMNZ, Museum of New Zealand Te Papa Tongarewa, Wellington; NMV, Museum Victoria, Melbourne; NSMT, National Museum of Nature and Science, Ueno Park, Tokyo; NTM, Museums and Art Galleries of the Northern Territory, Darwin; OCF-P, Okinawa Churashima Foundation, Japan; ORIUT, University of Tokyo, Ocean Research Institute, Tokyo; QM, Queensland Museum, Centre for Biodiversity, Brisbane; ROM, Royal Ontario Museum, Department of Natural History, Toronto; SAIAB, South African Institute for Aquatic Biodiversity, Grahamstown; SAMA, South Australian Museum, Adelaide; SIO, Scripps Institution of Oceanography, Marine Vertebrate Collection, University of California, San Diego, La Jolla; SLU, Southeastern Louisiana University, Museum of Biology, Hammond; SNFR, Seikai National Fisheries Research Institute, Nagasaki; UF, University of Florida, Florida Museum of Natural History, Gainesville; USNM, National Museum of Natural History, Smithsonian Institution, Department of Vertebrate Zoology, Washington, D.C.; UT, University of Tennessee, Department of Ecology and Evolutionary Biology, David A. Etnier Ichthyological Collection, Knoxville; UW, University of Washington, Burke Museum of Natural History and Culture, Seattle; YFTC, Yale Fish Tissue Collection, Department of Ecology and Evolutionary Biology, Yale University, New Haven; YPM, Yale University, Peabody Museum of Natural History, New Haven; ZMUB, Universitetsmuseet i Bergen, Bergen, Hordaland; ZMUC, Zoological Museum, University of Copenhagen, Copenhagen.



**Supplementary Table 2: Summary of TOPD pairwise comparisons of tree topologies inferred using different methods.**

|                                        | 702-taxon trees | 1,084-taxon trees               |                                |                                |
|----------------------------------------|-----------------|---------------------------------|--------------------------------|--------------------------------|
| Multiple-partition vs IQ-TREEsingle*   |                 | IQ-TREEsingle* vs IQ-TREEmulti† | IQ-TREEsingle* vs RAxML        | IQ-TREEmulti† vs RAxML         |
| <i>Acanthistius cinctus</i>            |                 | <i>Acanthistius cinctus</i>     | <i>Acanthistius cinctus</i>    | <i>Apogon affinis</i>          |
| <i>Arripis trutta</i>                  |                 | <i>Acanthurus triostegus</i>    | <i>Acanthurus triostegus</i>   | <i>Astrapogon stellatus</i>    |
| <i>Chloroscombrus orqueta</i>          |                 | <i>Icosteus aenigmaticus</i>    | <i>Apogon affinis</i>          | <i>Cryptopsaras couesii</i>    |
| <i>Icosteus aenigmaticus</i>           |                 |                                 | <i>Astrapogon stellatus</i>    | <i>Ectodus descampsii</i>      |
| <i>Lycodes concolor</i>                |                 |                                 | <i>Cryptopsaras couesii</i>    | <i>Haplotaxodon microlepis</i> |
| <i>Pomatomus saltatrix</i>             |                 |                                 | <i>Ectodus descampsii</i>      | <i>Nomorhamphus celebensis</i> |
| <i>Pseudanthias squamipinnis</i>       |                 |                                 | <i>Haplotaxodon microlepis</i> | <i>Phaeoptyx pigmentaria</i>   |
| <i>Selaroides leptolepis</i>           |                 |                                 | <i>Icosteus aenigmaticus</i>   | <i>Xenentodon cancila</i>      |
| <i>Sillago sihama</i>                  |                 |                                 | <i>Nomorhamphus celebensis</i> | <i>Zenarchopterus dispar</i>   |
|                                        |                 |                                 | <i>Phaeoptyx pigmentaria</i>   |                                |
|                                        |                 |                                 | <i>Xenentodon cancila</i>      |                                |
|                                        |                 |                                 | <i>Zenarchopterus dispar</i>   |                                |
| <b>Robinson-Foulds split distances</b> | 0.033           | 0.006                           | 0.012                          | 0.007                          |
| <b># Disagreeing Splits / Total</b>    | 46 / 1398       | 14 / 2212                       | 26 / 2212                      | 16 / 2212                      |
| <b>Nodal distance</b>                  | 1.05            | 0.49                            | 0.61                           | 0.51                           |

\*IQ-TREEsingle = tree resulting from an IQ-TREE analysis using an unpartitioned alignment

† “IQ-TREEmulti = tree resulting from an IQ-TREE analysis using the ModelFinder Plus option

Columns list taxa with different phylogenetic positions among the compared trees. Robinson-Foulds split distances, the number of disagreeing splits, and nodal distances are provided at the bottom of each column. All RAxML-ng analyses were performed on multiple-partition alignments that were partitioned with PartionFinder2. The topologies of the 702-taxon trees inferred using multiple-partition alignments in IQ-TREE and RAxML-ng were identical.

**Supplementary Table 3: Classification of Acanthomorpha.** The number of species in each taxonomic order is offered in the second column. Though every family is classified in an order, not every family is classified in a suborder or superfamily.

| Order            | Number of species | Suborder-Superfamily | Family                                                                                                                                                                                                                                                                 |
|------------------|-------------------|----------------------|------------------------------------------------------------------------------------------------------------------------------------------------------------------------------------------------------------------------------------------------------------------------|
| Polymixiiformes  | 10                |                      | Polymixiidae                                                                                                                                                                                                                                                           |
| Percopsiformes   | 12                |                      | Amblyopsidae<br>Aphredoderidae<br>Percopsidae                                                                                                                                                                                                                          |
| Zeiformes        | 33                |                      | Cyttidae<br>Grammicolepididae<br>Oreosomatidae<br>Parazenidae<br>Zeidae<br>Zeniontidae                                                                                                                                                                                 |
| Stylephoriformes | 1                 |                      | Stylephoridae                                                                                                                                                                                                                                                          |
| Gadiformes       | 615               |                      | Bathygadidae<br>Bregmacerotidae<br>Eulichthyidae<br>Gadidae<br>Gaidropsaridae<br>Lotidae<br>Lyconidae<br>Macrouridae<br>Macruronidae<br>Melanonidae<br>Merlucciidae<br>Moridae<br>Muraenolepididae<br>Phycidae<br>Ranicipitidae<br>Steindachneriidae<br>Trachyrincidae |
| Lampriformes     | 29                |                      |                                                                                                                                                                                                                                                                        |

|                            |       |           |                     |
|----------------------------|-------|-----------|---------------------|
|                            |       |           | Lampridae           |
|                            |       |           | Lophotidae          |
|                            |       |           | Radiicephalidae     |
|                            |       |           | Regalecidae         |
|                            |       |           | Trachipteridae      |
|                            |       |           | Veliferidae         |
| Trachichthyiformes         | 66    |           |                     |
|                            |       |           | Anomalopidae        |
|                            |       |           | Anoplogasteridae    |
|                            |       |           | Diretmidae          |
|                            |       |           | Monocentridae       |
|                            |       |           | Trachichthyidae     |
| Beryciformes               | 211   |           |                     |
|                            |       |           | Holocentridae       |
|                            |       |           | Rondeletiidae       |
|                            |       |           | Stephanoberycidae   |
|                            |       |           | Barbourisiidae      |
|                            |       |           | Cetomimidae         |
|                            |       |           | Berycidae           |
|                            |       |           | Melamphaidae        |
|                            |       |           | Gibberichthyidae    |
|                            |       |           | Hispidoberycidae    |
| Ophidiiformes              | 545   |           |                     |
|                            |       |           | Bythitidae          |
|                            |       |           | Dinematichthyidae   |
|                            |       |           | Ophidiidae          |
| Batrachoidiformes          | 84    |           |                     |
|                            |       |           | Batrachoididae      |
| Gobiiformes<br>(=Gobiaria) | 2,638 |           |                     |
|                            |       | Gobioidei | Rhyacichthyidae     |
|                            |       | Gobioidei | Odontobutidae       |
|                            |       | Gobioidei | Butidae             |
|                            |       | Gobioidei | Eleotridae          |
|                            |       | Gobioidei | Milyeringidae       |
|                            |       | Gobioidei | Thalasseleotrididae |
|                            |       | Gobioidei | Oxudercidae         |
|                            |       | Gobioidei | Gobiidae            |

Scombriformes  
(=Pelagiaria)

285

Trichonotidae  
Kurtidae  
Apogonidae

Amarsipidae  
Ariommatidae  
Arripidae  
Bramidae  
Caristiidae  
Centrolophidae  
Chiasmodontidae  
Gempylidae  
Icosteidae  
Lepidocybidae  
Nomeidae  
Pomatomidae  
Scombridae  
Scombrolabracidae  
Stromateidae  
Tetragonuridae  
Trichiuridae

Syngnathiformes  
(=Syngnatharia)

674

Syngnathoidei  
Syngnathoidei  
Syngnathoidei  
Syngnathoidei  
Syngnathoidei  
Syngnathoidei  
Callionymoidei  
Callionymoidei

Aulostomidae  
Centriscidae  
Macroramphosidae  
Fistularidae  
Solenostomidae  
Syngnathidae  
Callionymidae  
Draconettidae  
Mullidae  
Pegasidae  
Dactylopteridae

Blenniiformes  
(=Ovalentaria)

5,865

|                               |                  |
|-------------------------------|------------------|
| Blennioidei                   | Blenniidae       |
| Blennioidei                   | Chaenopsidae     |
| Blennioidei                   | Clinidae         |
| Blennioidei                   | Dactyloscopidae  |
| Blennioidei                   | Gobiesocidae     |
| Blennioidei                   | Labrisomidae     |
| Blennioidei                   | Tripterygiidae   |
| Atherinoidei-Belonoidea       | Adrianichthyidae |
| Atherinoidei-Belonoidea       | Belonidae        |
| Atherinoidei-Belonoidea       | Exocoetidae      |
| Atherinoidei-Belonoidea       | Hemiramphidae    |
| Atherinoidei-Cyprinodontoidea | Anablepidae      |
| Atherinoidei-Cyprinodontoidea | Aphaniidae       |
| Atherinoidei-Cyprinodontoidea | Aplocheilidae    |
| Atherinoidei-Cyprinodontoidea | Rivulidae        |
| Atherinoidei-Cyprinodontoidea | Cyprinodontidae  |
| Atherinoidei-Cyprinodontoidea | Fluviphylacidae  |
| Atherinoidei-Cyprinodontoidea | Fundulidae       |
| Atherinoidei-Cyprinodontoidea | Goodeidae        |
| Atherinoidei-Cyprinodontoidea | Nothobranchiidae |
| Atherinoidei-Cyprinodontoidea | Pantanodontidae  |
| Atherinoidei-Cyprinodontoidea | Poeciliidae      |
| Atherinoidei-Cyprinodontoidea | Profundulidae    |
| Atherinoidei-Cyprinodontoidea | Procatopodidae   |
| Atherinoidei-Cyprinodontoidea | Valenciidae      |
| Atherinoidei-Atherinoidea     | Atherinidae      |
| Atherinoidei-Atherinoidea     | Atherinopsidae   |
| Atherinoidei-Atherinoidea     | Atherionidae     |
| Atherinoidei-Atherinoidea     | Bedotiidae       |
| Atherinoidei-Atherinoidea     | Dentatherinidae  |
| Atherinoidei-Atherinoidea     | Isonidae         |
| Atherinoidei-Atherinoidea     | Melanotaeniidae  |
| Atherinoidei-Atherinoidea     | Phallostethidae  |
| Atherinoidei-Atherinoidea     | Pseudomugilidae  |
| Atherinoidei-Atherinoidea     | Telmatherinidae  |
| Cichloidei                    | Cichlidae        |

|                  |       |                         |                  |
|------------------|-------|-------------------------|------------------|
|                  |       | Cichloidei              | Pholidichthyidae |
|                  |       |                         | Ambassidae       |
|                  |       |                         | Embiotocidae     |
|                  |       |                         | Grammatidae      |
|                  |       |                         | Mugilidae        |
|                  |       |                         | Opistognathidae  |
|                  |       |                         | Plesiopidae      |
|                  |       |                         | Polycentridae    |
|                  |       |                         | Pomacentridae    |
|                  |       |                         | Pseudochromidae  |
|                  |       |                         | Congrogadidae    |
|                  |       |                         | Plesiopidae      |
| Synbranchiformes | 400   |                         |                  |
| (=Anabantaria)   |       |                         |                  |
|                  |       | Synbranchoidei          | Indostomidae     |
|                  |       | Synbranchoidei          | Synbranchidae    |
|                  |       | Synbranchoidei          | Chaudhuriidae    |
|                  |       | Synbranchoidei          | Mastacembelidae  |
|                  |       | Anabantoidei            | Anabantidae      |
|                  |       | Anabantoidei            | Helostomatidae   |
|                  |       | Anabantoidei            | Osphronemidae    |
|                  |       | Anabantoidei            | Channidae        |
|                  |       | Anabantoidei            | Badidae          |
|                  |       | Anabantoidei            | Nandidae         |
|                  |       | Anabantoidei            | Pristolepididae  |
| Carangiformes    | 1,100 |                         |                  |
| (=Carangaria)    |       |                         |                  |
|                  |       | Carangoidei-Carangoidea | Carangidae       |
|                  |       | Carangoidei-Carangoidea | Trachinotidae    |
|                  |       | Carangoidei-Carangoidea | Coryphaenidae    |
|                  |       | Carangoidei-Carangoidea | Echeneidae       |
|                  |       | Carangoidei-Carangoidea | Rachycentridae   |
|                  |       | Carangoidei-Xiphoidea   | Istiophoridae    |
|                  |       | Carangoidei-Xiphoidea   | Xiphiidae        |
|                  |       | Carangoidei             | Leptobramidae    |
|                  |       | Carangoidei             | Menidae          |
|                  |       | Carangoidei             | Nemastiidae      |

|                                 |                  |
|---------------------------------|------------------|
| Carangoidei                     | Toxotidae        |
| Pleuronectoidei                 | Psettodidae      |
| Pleuronectoidei-Pleuronectoidea | Achiridae        |
| Pleuronectoidei-Pleuronectoidea | Achiropsettidae  |
| Pleuronectoidei-Pleuronectoidea | Bothidae         |
| Pleuronectoidei-Pleuronectoidea | Citharidae       |
| Pleuronectoidei-Pleuronectoidea | Cyclopsettidae   |
| Pleuronectoidei-Pleuronectoidea | Cynoglossidae    |
| Pleuronectoidei-Pleuronectoidea | Oncopteridae     |
| Pleuronectoidei-Pleuronectoidea | Paralichthyidae  |
| Pleuronectoidei-Pleuronectoidea | Paralichthodidae |
| Pleuronectoidei-Pleuronectoidea | Pleuronectidae   |
| Pleuronectoidei-Pleuronectoidea | Poecilopsettidae |
| Pleuronectoidei-Pleuronectoidea | Rhombosoleidae   |
| Pleuronectoidei-Pleuronectoidea | Samaridae        |
| Pleuronectoidei-Pleuronectoidea | Scophthalmidae   |
| Pleuronectoidei-Pleuronectoidea | Soleidae         |

Centropomidae  
Lactariidae  
Polynemidae  
Sphyraenidae

Perciformes

3,192

|                |                  |
|----------------|------------------|
| Percoidei      | Percidae         |
| Percoidei      | Trachinidae      |
| Percoidei      | Niphonidae       |
|                | Epinephelidae    |
|                | Grammistidae     |
|                | Liopropomatidae  |
|                | Serranidae       |
|                | Anthiadidae      |
|                | Bembropidae      |
|                | Percophidae      |
| Notothenioidei | Bovichtidae      |
| Notothenioidei | Pseudaphritidae  |
| Notothenioidei | Eleginopsidae    |
| Notothenioidei | Artedidraconidae |
| Notothenioidei | Bathydraconidae  |
| Notothenioidei | Channichthyidae  |

|                |                    |
|----------------|--------------------|
| Notothenioidei | Harpagiferidae     |
| Notothenioidei | Nototheniidae      |
| Scorpaenoidei  | Platycephalidae    |
| Scorpaenoidei  | Bembridae          |
| Scorpaenoidei  | Congiopodidae      |
| Scorpaenoidei  | Neosebastidae      |
| Scorpaenoidei  | Hoplichthyidae     |
| Scorpaenoidei  | Normanichthyidae   |
| Scorpaenoidei  | Synanceiidae       |
| Scorpaenoidei  | Triglidae          |
| Scorpaenoidei  | Scorpaenidae       |
| Scorpaenoidei  | Anoplopomatidae    |
| Scorpaenoidei  | Hexagrammidae      |
| Scorpaenoidei  | Zaniolepididae     |
| Scorpaenoidei  | Trichodontidae     |
| Scorpaenoidei  | Cyclopteridae      |
| Scorpaenoidei  | Liparidae          |
| Scorpaenoidei  | Scorpaenichthyidae |
| Scorpaenoidei  | Agonidae           |
| Scorpaenoidei  | Cottidae           |
| Scorpaenoidei  | Psychrolutidae     |
| Scorpaenoidei  | Rhamphocottidae    |
| Scorpaenoidei  | Anarhichadidae     |
| Scorpaenoidei  | Bathymasteridae    |
| Scorpaenoidei  | Cryptacanthodidae  |
| Scorpaenoidei  | Pholidae           |
| Scorpaenoidei  | Ptilichthyidae     |
| Scorpaenoidei  | Scytalinidae       |
| Scorpaenoidei  | Stichaeidae        |
| Scorpaenoidei  | Zaproridae         |
| Scorpaenoidei  | Eulophiidae        |
| Scorpaenoidei  | Opisthocentridae   |
| Scorpaenoidei  | Lumpenidae         |
| Scorpaenoidei  | Neozoarcidae       |
| Scorpaenoidei  | Zoarcidae          |
| Scorpaenoidei  | Aulorhynchidae     |
| Scorpaenoidei  | Gasterosteidae     |
| Scorpaenoidei  | Hypoptychidae      |



Centrarchiformes

299

Aplodactylidae  
Centrarchidae  
Cheilodactylidae  
Chironemidae  
Cirrhitidae  
Dichistiidae  
Enoplosidae  
Girellidae  
Kuhliidae  
Kyphosidae  
Microcanthidae  
Scorpididae  
Latridae  
Oplegnathidae  
Percichthyidae  
Sinipercidae  
Terapontidae

Labriformes

757

Labroidei  
Labroidei  
Uranoscopoidei  
Uranoscopoidei  
Uranoscopoidei  
Uranoscopoidei  
Uranoscopoidei

Labridae  
Centrogenyidae  
Uranoscopidae  
Cheimarrichthyidae  
Pinguipedidae  
Ammodytidae  
Leptoscopidae

Acropomatiformes

308

Acropomatidae  
Banjosidae  
Bathyclupeidae  
Champsodontidae  
Creediidae  
Dinolestidae  
Epigonidae  
Glaucosomatidae  
Hemerocoetidae  
Howellidae  
Lateolabracidae

Leptoscopidae  
 Malakichthyidae  
 Ostracoberycidae  
 Pempheridae  
 Pentacerotidae  
 Polyprionidae  
 Stereolepidae  
 Scombropidae  
 Synagropidae  
 Symphysanodontidae

Acanthuriformes 2,350

Acanthuroidei Acanthuridae  
 Acanthuroidei Zanclidae  
 Acanthuroidei Luvaridae  
 Gerreidae  
 Moronidae  
 Sillaginidae  
 Drepaneidae  
 Ephippidae  
 Dinopercidae  
 Haemulidae  
 Sciaenidae  
 Monodactylidae  
 Lobotidae  
 Emmelichthyidae  
 Lutjanidae  
 Malacanthidae  
 Pomacanthidae  
 Leiognathidae  
 Chaetodontidae  
 Callanthiidae  
 Lethrinidae  
 Nemipteridae  
 Sparidae  
 Siganidae  
 Scatophagidae  
 Priacanthidae  
 Cepolidae

|                 |                    |
|-----------------|--------------------|
|                 | Caproidae          |
| Lophioidei      | Antennariidae      |
| Lophioidei      | Brachionichthyidae |
| Lophioidei      | Caulophrynidae     |
| Lophioidei      | Centrophrynidae    |
| Lophioidei      | Ceratiidae         |
| Lophioidei      | Chaunacidae        |
| Lophioidei      | Diceratiidae       |
| Lophioidei      | Gigantactinidae    |
| Lophioidei      | Himantolophidae    |
| Lophioidei      | Linophrynidae      |
| Lophioidei      | Lophichthyidae     |
| Lophioidei      | Lophiidae          |
| Lophioidei      | Melanocetidae      |
| Lophioidei      | Neoceratiidae      |
| Lophioidei      | Ogcocephalidae     |
| Lophioidei      | Oneirodidae        |
| Lophioidei      | Tetrabrachiidae    |
| Tetraodontoidei | Aracanidae         |
| Tetraodontoidei | Balistidae         |
| Tetraodontoidei | Diodontidae        |
| Tetraodontoidei | Molidae            |
| Tetraodontoidei | Monacanthidae      |
| Tetraodontoidei | Ostraciidae        |
| Tetraodontoidei | Tetraodontidae     |
| Tetraodontoidei | Triacanthidae      |
| Tetraodontoidei | Triacanthodidae    |
| Tetraodontoidei | Triodontidae       |

---

**Supplementary Table 4: Divergence date estimates in millions of years (Mya) and 95% Highest Posterior Density (HPD) credible intervals for major acanthomorph clades, generated using six alignments of 30 UCE loci in BEAST.** Estimates from the 702-taxon and 1,084-taxon time trees are both represented. All stem and crown ages are calculated from median node heights.

| Clade                 | # of Taxa | Loci Set      | Stem Age (Mya) | Stem 95% HPD (Mya) | Crown Age (Mya) | Crown 95% HPD (Mya) |
|-----------------------|-----------|---------------|----------------|--------------------|-----------------|---------------------|
| <b>Lampriformes</b>   | 1,084     | 30 loci set A | 131.28         | [112.28, 145.67]   | 58.09           | [55.84, 69.71]      |
|                       |           | 30 loci set B | 134.87         | [117.46, 147.27]   | 57.83           | [55.82, 67.74]      |
|                       |           | 30 loci set C | 133.75         | [116.00, 146.56]   | 58.15           | [55.82, 72.19]      |
|                       | 702       | 30 loci set D | 133.07         | [115.53, 145.96]   | 57.90           | [55.83, 69.38]      |
|                       |           | 30 loci set E | 137.30         | [123.25, 147.73]   | 57.99           | [55.81, 69.90]      |
|                       |           | 30 loci set F | 137.28         | [119.55, 152.47]   | 57.90           | [55.81, 69.26]      |
| <i>Polymixia</i>      | 1,084     | 30 loci set A | 96.79          | [93.96, 108.22]    |                 |                     |
|                       |           | 30 loci set B | 98.33          | [93.99, 120.28]    |                 |                     |
|                       |           | 30 loci set C | 97.52          | [93.96, 112.48]    |                 |                     |
|                       | 702       | 30 loci set D | 97.16          | [93.94, 111.95]    |                 |                     |
|                       |           | 30 loci set E | 96.69          | [93.92, 108.91]    |                 |                     |
|                       |           | 30 loci set F | 96.77          | [93.93, 109.90]    |                 |                     |
| <b>Percopsiformes</b> | 1,084     | 30 loci set A | 96.79          | [93.96, 108.22]    | 53.54           | [40.12, 72.36]      |
|                       |           | 30 loci set B | 98.33          | [93.99, 120.28]    | 53.04           | [38.36, 71.85]      |
|                       |           | 30 loci set C | 97.52          | [93.96, 112.48]    | 54.02           | [39.34, 75.18]      |
|                       | 702       | 30 loci set D | 97.16          | [93.94, 111.95]    | 36.57           | [34.12, 51.86]      |
|                       |           | 30 loci set E | 96.69          | [93.92, 108.91]    | 36.34           | [34.12, 46.72]      |
|                       |           | 30 loci set F | 96.77          | [93.93, 109.90]    | 36.40           | [34.12, 47.56]      |
| <b>Zeiformes</b>      | 1,084     | 30 loci set A | 105.92         | [88.81, 122.96]    | 49.98           | [37.33, 72.02]      |
|                       |           | 30 loci set B | 109.87         | [94.35, 129.43]    | 54.86           | [38.88, 77.00]      |
|                       |           | 30 loci set C | 109.41         | [94.58, 125.37]    | 50.10           | [37.46, 66.39]      |
|                       | 702       | 30 loci set D | 108.97         | [92.86, 124.77]    | 50.09           | [36.68, 72.93]      |
|                       |           | 30 loci set E | 112.40         | [97.33, 127.83]    | 52.23           | [36.27, 73.79]      |
|                       |           | 30 loci set F | 110.89         | [87.82, 127.33]    | 54.95           | [40.48, 79.84]      |
| <i>Stylephorus</i>    | 1,084     | 30 loci set A | 88.48          | [72.87, 105.39]    |                 |                     |
|                       |           | 30 loci set B | 92.97          | [75.31, 112.39]    |                 |                     |
|                       |           | 30 loci set C | 94.55          | [79.52, 110.80]    |                 |                     |
|                       | 702       | 30 loci set D | 94.04          | [78.07, 110.29]    |                 |                     |
|                       |           | 30 loci set E | 97.74          | [82.02, 113.36]    |                 |                     |
|                       |           | 30 loci set F | 93.74          | [73.39, 112.47]    |                 |                     |

|                           |       |               |        |                  |        |                  |
|---------------------------|-------|---------------|--------|------------------|--------|------------------|
| <b>Gadiformes</b>         | 1,084 | 30 loci set A | 88.48  | [72.87, 105.39   | 77.01  | [61.50, 92.18]   |
|                           |       | 30 loci set B | 92.97  | [75.31,112.39]   | 79.22  | [63.54, 97.57]   |
|                           |       | 30 loci set C | 94.55  | [79.52, 110.80]  | 81.29  | [65.42, 97.97]   |
|                           | 702   | 30 loci set D | 94.04  | [78.07, 110.29]  | 87.13  | [71.95, 103.23]  |
|                           |       | 30 loci set E | 97.74  | [82.02, 113.36]  | 84.64  | [68.98, 99.22]   |
|                           |       | 30 loci set F | 93.74  | [73.39, 112.47]  | 80.19  | [60.80, 99.93]   |
| <b>Trachichthyiformes</b> | 1,084 | 30 loci set A | 137.42 | [129.12, 147.30] | 46.58  | [24.68, 75.50]   |
|                           |       | 30 loci set B | 136.40 | [127.79, 144.74] | 42.47  | [24.82, 72.22]   |
|                           |       | 30 loci set C | 138.07 | [129.74, 145.62] | 44.99  | [25.20, 78.24]   |
|                           | 702   | 30 loci set D | 138.73 | [129.73, 147.16] | 46.53  | [20.28, 78.59]   |
|                           |       | 30 loci set E | 138.45 | [129.72, 147.34] | 46.02  | [23.89, 77.49]   |
|                           |       | 30 loci set F | 138.55 | [125.63, 151.42] | 51.89  | [27.55, 90.99]   |
| <b>Beryciformes</b>       | 1,084 | 30 loci set A | 132.91 | [123.97, 143.13] | 100.57 | [98.23, 107.44]  |
|                           |       | 30 loci set B | 132.29 | [122.95, 141.24] | 100.35 | [98.28, 107.45]  |
|                           |       | 30 loci set C | 133.93 | [126.23, 141.83] | 100.57 | [98.35, 107.08]  |
|                           | 702   | 30 loci set D | 134.77 | [126.10, 144.04] | 100.69 | [98.18, 108.19]  |
|                           |       | 30 loci set E | 134.80 | [125.53, 143.44] | 100.70 | [98.18, 108.29]  |
|                           |       | 30 loci set F | 134.23 | [116.61, 148.64] | 100.69 | [98.17, 108.06]  |
| <b>Ophidiiformes</b>      | 1,084 | 30 loci set A | 126.76 | [116.96, 135.68] | 84.50  | [59.31, 111.29]  |
|                           |       | 30 loci set B | 126.31 | [117.66, 135.78] | 88.86  | [66.89, 115.30]  |
|                           |       | 30 loci set C | 127.63 | [120.65, 136.57] | 92.32  | [65.49, 115.42]  |
|                           | 702   | 30 loci set D | 128.36 | [119.08, 137.65] | 85.49  | [57.95, 115.91]  |
|                           |       | 30 loci set E | 127.61 | [117.49, 137.46] | 83.87  | [58.20, 110.70]  |
|                           |       | 30 loci set F | 127.09 | [105.34, 141.44] | 80.24  | [53.46, 114.16]  |
| <b>Batrachoididae</b>     | 1,084 | 30 loci set A | 121.85 | [113.37, 130.94] | 49.09  | [25.28, 76.27]   |
|                           |       | 30 loci set B | 121.66 | [111.66, 130.20] | 50.84  | [29.93, 78.15]   |
|                           |       | 30 loci set C | 123.25 | [114.82, 130.23] | 43.56  | [23.91, 70.03]   |
|                           | 702   | 30 loci set D | 123.43 | [114.13, 133.12] | 43.41  | [19.20, 76.30]   |
|                           |       | 30 loci set E | 123.23 | [113.51, 133.45] | 43.46  | [18.07, 75.89]   |
|                           |       | 30 loci set F | 121.76 | [104.77, 139.03] | 50.55  | [27.08, 83.20]   |
| <b>Gobiiformes</b>        | 1,084 | 30 loci set A | 117.81 | [108.89, 126.63] | 109.64 | [98.88, 119.95]  |
|                           |       | 30 loci set B | 118.22 | [107.12, 126.70] | 111.01 | [99.69, 121.14]  |
|                           |       | 30 loci set C | 119.73 | [111.67, 127.22] | 112.57 | [103.28, 121.44] |
|                           | 702   | 30 loci set D | 119.80 | [110.41, 129.24] | 111.76 | [100.58, 122.53] |
|                           |       | 30 loci set E | 119.71 | [108.92, 129.01] | 111.91 | [99.63, 122.86]  |
|                           |       | 30 loci set F | 117.80 | [97.66, 132.04]  | 110.32 | [94.89, 124.32]  |

|                         |       |               |        |                  |        |                 |
|-------------------------|-------|---------------|--------|------------------|--------|-----------------|
| <b>Syngnathiformes</b>  | 1,084 | 30 loci set A | 110.30 | [101.51, 120.65] | 104.59 | [95.01, 114.75] |
|                         |       | 30 loci set B | 110.65 | [97.59, 119.08]  | 104.49 | [93.39, 114.84] |
|                         |       | 30 loci set C | 111.82 | [101.46, 120.96] | 105.30 | [92.93, 115.32] |
|                         | 702   | 30 loci set D | 109.82 | [99.69, 119.86]  | 102.66 | [91.04, 112.38] |
|                         |       | 30 loci set E | 109.64 | [98.89, 119.71]  | 101.48 | [88.91, 111.90] |
|                         |       | 30 loci set F | 107.73 | [87.68, 122.92]  | 98.93  | [80.57, 113.81] |
| <b>Scombriformes</b>    | 1,084 | 30 loci set A | 110.30 | [101.51, 120.65] | 65.83  | [59.72, 74.36]  |
|                         |       | 30 loci set B | 110.65 | [97.59, 119.08]  | 68.10  | [61.74, 79.89]  |
|                         |       | 30 loci set C | 111.82 | [101.46, 120.96] | 66.96  | [60.70, 76.91]  |
|                         | 702   | 30 loci set D | 109.82 | [99.69, 119.86]  | 63.99  | [58.44, 71.70]  |
|                         |       | 30 loci set E | 109.64 | [98.89, 119.71]  | 64.74  | [59.56, 70.85]  |
|                         |       | 30 loci set F | 107.73 | [87.68, 122.92]  | 63.05  | [58.28, 69.03]  |
| <b>Blenniiformes</b>    | 1,084 | 30 loci set A | 105.90 | [96.11, 115.30]  | 96.20  | [86.23, 105.98] |
|                         |       | 30 loci set B | 107.22 | [96.59, 118.94]  | 96.77  | [84.99, 108.06] |
|                         |       | 30 loci set C | 106.45 | [95.78, 117.40]  | 95.84  | [83.69, 106.66] |
|                         | 702   | 30 loci set D | 107.79 | [97.99, 120.19]  | 98.25  | [88.06, 109.92] |
|                         |       | 30 loci set E | 104.16 | [93.40, 114.87]  | 93.99  | [83.25, 104.93] |
|                         |       | 30 loci set F | 102.17 | [87.07, 117.66]  | 90.17  | [78.27, 104.02] |
| <b>Synbranchiformes</b> | 1,084 | 30 loci set A | 98.87  | [87.37, 110.69]  | 86.89  | [73.15, 100.03] |
|                         |       | 30 loci set B | 99.34  | [86.57, 113.26]  | 85.96  | [72.16, 98.73]  |
|                         |       | 30 loci set C | 98.46  | [85.78, 111.44]  | 88.14  | [75.77, 102.19] |
|                         | 702   | 30 loci set D | 99.93  | [85.23, 111.97]  | 87.17  | [72.00, 101.38] |
|                         |       | 30 loci set E | 95.32  | [81.12, 108.53]  | 81.86  | [66.73, 96.64]  |
|                         |       | 30 loci set F | 97.98  | [78.90, 112.10]  | 83.95  | [66.38, 100.05] |
| <b>Carangiformes</b>    | 1,084 | 30 loci set A | 98.87  | [87.37, 110.69]  | 75.72  | [66.44, 86.53]  |
|                         |       | 30 loci set B | 99.34  | [86.57, 113.26]  | 73.94  | [65.91, 85.40]  |
|                         |       | 30 loci set C | 98.46  | [85.78, 111.44]  | 73.12  | [65.15, 85.06]  |
|                         | 702   | 30 loci set D | 99.93  | [85.23, 111.97]  | 75.66  | [65.74, 88.17]  |
|                         |       | 30 loci set E | 95.32  | [81.12, 108.53]  | 73.30  | [64.89, 83.24]  |
|                         |       | 30 loci set F | 97.98  | [78.90, 112.10]  | 71.38  | [63.27, 81.47]  |
| <b>Perciformes</b>      | 1,084 | 30 loci set A | 93.73  | [81.70, 107.69]  | 66.86  | [55.18, 78.00]  |
|                         |       | 30 loci set B | 87.35  | [77.09, 101.56]  | 58.70  | [48.42, 71.23]  |
|                         |       | 30 loci set C | 86.31  | [76.71, 99.62]   | 61.77  | [51.99, 71.14]  |
|                         | 702   | 30 loci set D | 86.27  | [76.37, 98.52]   | 63.53  | [52.65, 77.01]  |
|                         |       | 30 loci set E | 87.27  | [76.89, 100.23]  | 59.84  | [48.61, 71.50]  |
|                         |       | 30 loci set F | 88.41  | [77.47, 104.10]  | 59.33  | [49.69, 72.02]  |

|                         |       |               |        |                  |        |                  |
|-------------------------|-------|---------------|--------|------------------|--------|------------------|
| <b>Centrarchiformes</b> | 1,084 | 30 loci set A | 83.17  | [75.26, 92.76]   | 53.26  | [35.65, 78.06]   |
|                         |       | 30 loci set B | 80.67  | [73.27, 90.20]   | 50.84  | [35.00, 77.08]   |
|                         |       | 30 loci set C | 80.55  | [73.40, 89.02]   | 78.34  | [59.02, 88.96]   |
|                         | 702   | 30 loci set D | 81.63  | [73.63, 91.51]   | 54.56  | [36.97, 79.62]   |
|                         |       | 30 loci set E | 80.75  | [73.11, 89.16]   | 61.09  | [38.33, 84.46]   |
|                         |       | 30 loci set F | 82.97  | [73.07, 93.94]   | 46.08  | [31.65, 71.94]   |
| <b>Labriformes</b>      | 1,084 | 30 loci set A | 81.03  | [73.25, 89.30]   | 76.07  | [66.21, 86.95]   |
|                         |       | 30 loci set B | 78.81  | [71.72, 87.07]   | 76.55  | [67.89, 85.94]   |
|                         |       | 30 loci set C | 79.34  | [72.06, 87.16]   | 75.25  | [65.80, 84.60]   |
|                         | 702   | 30 loci set D | 79.91  | [72.33, 88.93]   | 74.89  | [64.69, 85.59]   |
|                         |       | 30 loci set E | 79.06  | [71.80, 86.93]   | 76.45  | [73.11, 89.16]   |
|                         |       | 30 loci set F | 81.47  | [71.92, 91.68]   | 77.08  | [66.51, 88.21]   |
| <b>Acropomatiformes</b> | 1,084 | 30 loci set A | 80.09  | [73.10, 88.58]   | 46.53  | [32.55, 60.96]   |
|                         |       | 30 loci set B | 77.12  | [70.67, 84.95]   | 47.39  | [33.95, 65.12]   |
|                         |       | 30 loci set C | 78.32  | [71.11, 85.72]   | 46.24  | [33.17, 59.99]   |
|                         | 702   | 30 loci set D | 78.83  | [71.72, 87.89]   | 23.78  | [14.06, 35.85]   |
|                         |       | 30 loci set E | 77.45  | [70.87, 85.19]   | 22.06  | [13.60, 33.15]   |
|                         |       | 30 loci set F | 80.07  | [70.93, 89.84]   | 21.41  | [12.44, 31.76]   |
| <b>Acanthuriformes</b>  | 1,084 | 30 loci set A | 80.09  | [73.10, 88.58]   | 78.52  | [72.01, 86.64]   |
|                         |       | 30 loci set B | 77.12  | [70.67, 84.95]   | 75.78  | [69.13, 82.30]   |
|                         |       | 30 loci set C | 78.32  | [71.11, 85.72]   | 76.51  | [70.12, 84.05]   |
|                         | 702   | 30 loci set D | 78.83  | [71.72, 87.89]   | 76.39  | [69.95, 84.70]   |
|                         |       | 30 loci set E | 77.45  | [70.87, 85.19]   | 75.97  | [69.71, 83.28]   |
|                         |       | 30 loci set F | 80.07  | [70.93, 89.84]   | 78.16  | [69.59, 87.49]   |
| <b>Percomorpha</b>      | 1,084 | 30 loci set A | 132.91 | [123.97, 143.13] | 126.76 | [116.96, 135.68] |
|                         |       | 30 loci set B | 132.29 | [122.95, 141.24] | 126.31 | [117.66, 135.78] |
|                         |       | 30 loci set C | 133.93 | [126.23, 141.83] | 127.63 | [120.65, 136.57] |
|                         | 702   | 30 loci set D | 134.77 | [126.10, 144.04] | 128.36 | [119.08, 137.65] |
|                         |       | 30 loci set E | 134.80 | [125.53, 143.44] | 127.61 | [117.49, 137.46] |
|                         |       | 30 loci set F | 134.23 | [116.61, 148.64] | 127.09 | [105.34, 141.44] |

## References

- 1 Harrington, R. C. *et al.* Phylogenomic analysis of carangimorph fishes reveals flatfish asymmetry arose in a blink of the evolutionary eye. *BMC Evol. Biol.* **16**, 224, doi:10.1186/s12862-016-0786-x (2016).
- 2 Longo, S. J. *et al.* Phylogenomic analysis of a rapid radiation of misfit fishes (Syngnathiformes) using ultraconserved elements. *Mol. Phylogenet. Evol.* **113**, 33-48, doi:https://doi.org/10.1016/j.ympev.2017.05.002 (2017).
- 3 Alfaro, M. E. *et al.* Explosive diversification of marine fishes at the Cretaceous–Palaeogene boundary. *Nature Ecology & Evolution* **2**, 688-696, doi:10.1038/s41559-018-0494-6 (2018).
- 4 DiBattista, J. D. *et al.* Ice ages and butterflyfishes: Phylogenomics elucidates the ecological and evolutionary history of reef fishes in an endemism hotspot. *Ecology and Evolution* **8**, 10989-11008, doi:10.1002/ece3.4566 (2018).
- 5 Friedman, M. *et al.* A phylogenomic framework for pelagiarian fishes (Acanthomorpha: Percomorpha) highlights mosaic radiation in the open ocean. *Proceedings of the Royal Society B: Biological Sciences* **286**, 20191502, doi:10.1098/rspb.2019.1502 (2019).
- 6 Eschmeyer, W. N. & Fricke, R. (California Academy of Sciences (<http://research.calacademy.org/research/ichthyology/catalog/fishcatmain.asp>), San Francisco, 2021).
- 7 Near, T. J. *et al.* Resolution of ray-finned fish phylogeny and timing of diversification. *Proc. Nat. Acad. Sci. USA* **109**, 13698-13703, doi:10.1073/Pnas.1206625109 (2012).
- 8 Hughes, L. C. *et al.* Comprehensive phylogeny of ray-finned fishes (Actinopterygii) based on transcriptomic and genomic data. *Proc. Nat. Acad. Sci. USA*, doi:10.1073/pnas.1719358115 (2018).
- 9 Glenn, T. C. *et al.* Adapterama I: universal stubs and primers for 384 unique dual-indexed or 147,456 combinatorially-indexed Illumina libraries (iTru & iNext). *PeerJ* **7**, e7755, doi:10.7717/peerj.7755 (2019).
- 10 Faircloth, B. C. PHYLUCE is a software package for the analysis of conserved genomic loci. *Bioinformatics* **32**, 786-788, doi:10.1093/bioinformatics/btv646 (2016).
- 11 Faircloth, B. C. *et al.* Ultraconserved elements anchor thousands of genetic markers spanning multiple evolutionary timescales. *Syst. Biol.* **61**, 717-726, doi:10.1093/sysbio/sys004 (2012).
- 12 Bolger, A. M., Lohse, M. & Usadel, B. Trimmomatic: a flexible trimmer for Illumina sequence data. *Bioinformatics* **30**, 2114-2120 (2014).
- 13 Grabherr, M. G. *et al.* Full-length transcriptome assembly from RNA-Seq data without a reference genome. *Nat Biotechnol* **29**, 644-652, doi:10.1038/nbt.1883 (2011).
- 14 Katoh, K. & Standley, D. M. MAFFT multiple sequence alignment software Version 7: improvements in performance and usability. *Mol. Biol. Evol.* **30**, 772-780, doi:10.1093/molbev/mst010 (2013).
- 15 Capella-Gutiérrez, S., Silla-Martínez, J. M. & Gabaldón, T. trimAl: a tool for automated alignment trimming in large-scale phylogenetic analyses. *Bioinformatics* **25**, 1972-1973, doi:10.1093/bioinformatics/btp348 (2009).



- 16 Nguyen, L. T., Schmidt, H. A., von Haeseler, A. & Minh, B. Q. IQ-TREE: A fast and effective stochastic algorithm for estimating maximum likelihood phylogenies. *Mol. Biol. Evol.* **32**, 268-274, doi:10.1093/molbev/msu300 (2015).
- 17 Kozlov, A. M., Darriba, D., Flouri, T., Morel, B. & Stamatakis, A. RAxML-NG: a fast, scalable and user-friendly tool for maximum likelihood phylogenetic inference. *Bioinformatics* **35**, 4453-4455, doi:10.1093/bioinformatics/btz305 (2019).
- 18 Minh, B. Q., Nguyen, M. A. T. & von Haeseler, A. Ultrafast Approximation for Phylogenetic Bootstrap. *Mol. Biol. Evol.* **30**, 1188-1195, doi:10.1093/molbev/mst024 (2013).
- 19 Kalyaanamoorthy, S., Minh, B. Q., Wong, T. K. F., von Haeseler, A. & Jermiin, L. S. ModelFinder: fast model selection for accurate phylogenetic estimates. *Nat Methods* **14**, 587-589 (2017).
- 20 Lanfear, R., Frandsen, P. B., Wright, A. M., Senfeld, T. & Calcott, B. PartitionFinder 2: New methods for selecting partitioned models of evolution for molecular and morphological phylogenetic analyses. *Mol. Biol. Evol.* **34**, 772-773, doi:10.1093/molbev/msw260 (2017).
- 21 Puigbò, P., Garcia-Vallvé, S. & McInerney, J. O. TOPD/FMTS: a new software to compare phylogenetic trees. *Bioinformatics* **23**, 1556-1558, doi:10.1093/bioinformatics/btm135 (2007).
- 22 Robinson, D. F. & Foulds, L. R. Comparison of phylogenetic trees. *Math. Biosci.* **53**, 131-147 (1981).
- 23 Steel, M. A. & Penny, D. Distributions of tree comparison metrics: Some new results. *Syst. Biol.* **42**, 126-141. (1993).
- 24 Zhang, C., Rabiee, M., Sayyari, E. & Mirarab, S. ASTRAL-III: polynomial time species tree reconstruction from partially resolved gene trees. *BMC Bioinf.* **19**, 153, doi:10.1186/s12859-018-2129-y (2018).
- 25 Mai, U. & Mirarab, S. TreeShrink: fast and accurate detection of outlier long branches in collections of phylogenetic trees. *Bmc Genomics* **19**, 272, doi:10.1186/s12864-018-4620-2 (2018).
- 26 Ane, C., Larget, B., Baum, D. A., Smith, S. D. & Rokas, A. Bayesian estimation of concordance among gene trees. *Mol. Biol. Evol.* **24**, 412-426, doi:10.1093/molbev/msl170 (2007).
- 27 Ronquist, F. *et al.* MrBayes 3.2: efficient Bayesian phylogenetic inference and model choice across a large model space. *Syst. Biol.* **61**, 539-542, doi:10.1093/sysbio/sys029 (2012).
- 28 Bouckaert, R. *et al.* BEAST 2: a software platform for Bayesian evolutionary analysis. *Plos Comput Biol* **10**, e1003537, doi:10.1371/journal.pcbi.1003537 (2014).
- 29 Oliveros, C. H. *et al.* Earth history and the passerine superradiation. *Proceedings of the National Academy of Sciences* **116**, 7916, doi:10.1073/pnas.1813206116 (2019).
- 30 Rambaut, A., Drummond, A. J., Xie, D., Baele, G. & Suchard, M. A. Posterior summarization in Bayesian phylogenetics using Tracer 1.7. *Syst. Biol.* **67**, 901-904, doi:10.1093/sysbio/syy032 (2018).
- 31 Drummond, A. J. & Rambaut, A. BEAST: Bayesian evolutionary analysis by sampling trees. *BMC Evol. Biol.* **7**, 214 (2007).

- 32 Drummond, A. J., Suchard, M. A., Xie, D. & Rambaut, A. Bayesian phylogenetics with BEAUti and the BEAST 1.7. *Mol. Biol. Evol.* **29**, 1969-1973, doi:10.1093/molbev/mss075 (2012).
- 33 Höhna, S., May, M. R. & Moore, B. R. TESS: an R package for efficiently simulating phylogenetic trees and performing Bayesian inference of lineage diversification rates. *Bioinformatics* **32**, 789-791, doi:10.1093/bioinformatics/btv651 (2016).
- 34 Rabosky, D. L. Automatic detection of key innovations, rate shifts, and diversity-dependence on phylogenetic trees. *PLOS One* **9**, e89543, doi:10.1371/journal.pone.0089543 (2014).
- 35 Rabosky, D. L., Donnellan, S. C., Grundler, M. & Lovette, I. J. Analysis and visualization of complex macroevolutionary dynamics: an example from Australian scincid lizards. *Syst. Biol.* **63**, 610-627 (2014).
- 36 Price, S. A. *et al.* Building a body shape morphospace of teleostean fishes. *Integ. Comp. Biol.* **59**, 716-730, doi:10.1093/icb/icz115 (2019).
- 37 Revell, L. J. phytools: an R package for phylogenetic comparative biology (and other things). *Methods Ecol Evol* **3**, 217-223, doi:10.1111/j.2041-210X.2011.00169.x (2012).
- 38 Harmon, L. J., Weir, J. T., Brock, C. D., Glor, R. E. & Challenger, W. GEIGER: investigating evolutionary radiations. *Bioinformatics* **24**, 129-131, doi:10.1093/bioinformatics/btm538 (2008).
- 39 Davesne, D. *et al.* Early fossils illuminate character evolution and interrelationships of Lampridiformes (Teleostei, Acanthomorpha). *Zool. J. Linn. Soc.* **172**, 475-498 (2014).
- 40 Delbarre, D. J., Davesne, D. & Friedman, M. Anatomy and relationships of *Aipichthys pretiosus* and '*Aipichthys*' *nuchalis* (Acanthomorpha: Lampridomorpha), with a review of Late Cretaceous relatives of oarfishes and their allies. *J Syst Palaeontol* **14**, 545-567 (2016).
- 41 Ogg, J. G. & Hinnov, L. A. in *The Geologic Time Scale 2012* Vol. 2 (eds F. Gradstein, J. Ogg, M.D. Schmitz, & G.M. Ogg) 793-853 (Elsevier, 2012).
- 42 Patterson, C. A review of Mesozoic acanthopterygian fishes, with special reference to those of the English Chalk. *Phil. Trans. R. Soc. B* **247**, 213-482 (1964).
- 43 Patterson, C. An overview of the early fossil record of acanthomorphs. *Bull. Mar. Sci.* **52**, 29-59 (1993).
- 44 Owen, E. in *Fossils of the Chalk. Palaeontological Association Field Guides to Fossils: Number 2* (ed A.B. Smith) 9-14 (Oxford University Press, 1987).
- 45 Friedman, M., Beckett, H. T., Close, R. A. & Johanson, Z. The English Chalk and London Clay: two remarkable British bony fish <em>&lt;/em>Lagerstätten</em>. *Geological Society, London, Special Publications* **430**, 165, doi:10.1144/SP430.18 (2016).
- 46 Rosen, D. E. & Patterson, C. The structure and relationships of the paracanthopterygian fishes. *Bull. Amer. Mus. Nat. Hist.* **141**, 357-474 (1969).
- 47 Murray, A. M. & Wilson, M. V. H. in *Mesozoic fishes 2 - systematics and fossil record* (eds G. Arratia & H.-P. Schultze) 397-411 (Verlag Dr. Friedrich Pfeil, 1999).
- 48 Armbruster, J. W., Niemiller, M. L. & Hart, P. B. Morphological evolution of the Cave-, Spring-, and Swampfishes of the Amblyopsidae (Percopsiformes). *Copeia* **104**, 763-777, doi:10.1643/CI-15-339 (2016).

- 49 Evanoff, E., McIntosh, W. C. & Murphey, P. C. Stratigraphic summary and  $^{40}\text{Ar}/^{39}\text{Ar}$  geochronology of the Florissant Formation, Colorado. *Proc. Denver Mus. Nature Sci. Series 4, no. 1*, 1-16 (2001).
- 50 Danil'chenko, P. G. Kostistye ryby Maikopskikh otlozhenii Kavkaza [Bony fishes of the Maikop deposits of the Caucasus]. *Trudy Paleon. Inst.* **78**, 1-208. [In Russian] (1960).
- 51 Baciu, D.-S., Bannikov, A. F. & Tyler, J. C. Revision of the fossil fishes of the family Zeidae (Zeiformes). *Boll. Mus. Storia Nat. Verona, Geol. Paleon. Preist.* **29**, 95-128 (2005).
- 52 Santini, F., Tyler, J. C., Bannikov, A. F. & Baciu, D. S. A phylogeny of extant and fossil buckler dory fishes, family Zeidae (Zeiformes, Acanthomorpha). *Cybium* **30**, 99-107 (2006).
- 53 Jones, R. W. & Simmons, M. D. A review of the stratigraphy of Eastern Paratethys (Oligocene-Holocene), with particular emphasis on the Black Sea. *AAPG Mem.* **68**, 39-52 (1997).
- 54 Luterbacher, H. P. *et al.* in *A geologic time scale 2004* (eds F. Gradstein, J. Ogg, & A. Smith) 384-408 (Cambridge University Press, 2004).
- 55 Danil'chenko, P. G. in *Ocherki po filogenii i sistematike iskopayemykh ryb i beschelyustnykh [Outlines on the phylogeny and systematics of fossil fishes and agnathans]* (ed D.V. Obruchev) 113-156. [In Russian] (Nauka, 1968).
- 56 Bannikov, A. F. Review of fossil Lampridiformes (Teleostei) finds with a description of a new Lophotidae genus and species from the Oligocene of the northern Caucasus. *Paleontol. J.* **33**, 68-76 (1999).
- 57 Bannikov, A. F. & Parin, N. N. The list of marine fishes from Cenozoic (Upper Paleocene-middle Miocene) localities in southern European Russia and adjacent countries. *J. Ichthyol.* **37**, 150-155 (1997).
- 58 Patterson, C. New Cretaceous berycoid fishes from the Lebanon. *Bull. Brit. Mus. (Nat. Hist.) Geol.* **14**, 69-109 (1967).
- 59 Zehren, S. J. The comparative osteology and phylogeny of the Beryciformes. *Evolutionary Monogr.* **1**, 1-389 (1979).
- 60 Sorbini, L. Gli Holocentridae di Monte Bolca. I: *Eoholocentrum*, nov. gen., *Eoholocentrum macrocephalum* (de Blainville) (Pisces-Actinopterygii). *Stud. Ric. Giacom. Terz. Bolca* **2**, 205-228 (1975).
- 61 Sorbini, L. Gli Holocentridae di Monte Bolca. II: *Tenuicentrum pattersoni* nov. gen. nov. sp. Nuovi dati a favore dell'origine monofiletica dei beryciformi (Pisces). *Stud. Ric. Giacom. Terz. Bolca* **2**, 456-472 (1975).
- 62 Sorbini, L. Gli Holocentridae di Monte Bolca. III. *Berybolcensis leptacanthus* (Agassiz). *Stud. Ric. Giacom. Terz. Bolca* **4**, 19-35 (1979).
- 63 Stewart, J. D. *Taxonomy, paleoecology, and stratigraphy of the halecostome-inoceramid associations of the North American Upper Cretaceous epicontinental seaway*, University of Kansas, (1984).
- 64 Papazzoni, C., Carnevale, G., Fornaciari, E., Giusberti, L. & Trevisani, E. 29-36 (2014).
- 65 Papazzoni, C. A. & Trevisani, E. Facies analysis, palaeoenvironmental reconstruction, and biostratigraphy of the "Pesciara di Bolca" (Verona, northern Italy): An early Eocene *Fossil-Lagerstätte*. *Palaeogeogr. Palaeoclimat. Palaecol.* **242**, 21-35 (2006).

- 66 Sorbini, L. The Cretaceous fishes of Nardò. I°. Order Gasterosteiformes (Pisces). *Boll. Mus. Civ. Stor. Nat. Verona* **8**, 1-27 (1981).
- 67 Orr, J. W. *Phylogenetic relationships of gasterosteiform fishes (Teleostei: Acanthomorpha)*, University of Washington, (1995).
- 68 Pietsch, T. W. Evolutionary relationships of the sea moths (Teleostei: Pegasidae) with a classification of the gasterosteiform families. *Copeia* **1978**, 517-529 (1978).
- 69 Medizza, F. & Sorbini, L. in *I vertebrati fossili italiani—Catalogo dell Mostra* 131-134 (Museo Civico di Storia Naturale, 1980).
- 70 Blot, J. La faune ichthyologique des gisements du Monte Bolca (Province de Vérone, Italie). Catalogue systématique présentat l'état actuel des recherches concernant cette faune. *Bull. Mus. nation. d'Hist. nat., Paris, 4e serie, sec. C* **2**, 339-396 (1980).
- 71 Doiuchi, R. & Nakabo, T. Molecular phylogeny of the stromateoid fishes (Teleostei : Perciformes) inferred from mitochondrial DNA sequences and compared with morphology-based hypotheses. *Mol. Phylogenet. Evol.* **39**, 111-123 (2006).
- 72 Carnevale, G. & Bannikov, A. F. Description of a new stromateoid fish from the Miocene of St. Eugene, Algeria. *Acta Palaeontol Pol* **51**, 489-497 (2006).
- 73 Horn, M. H. Systematic Status and Aspects of the Ecology of the Elongate Ariommid Fishes (Suborder Stromateoidei) in the Atlantic. *Bull. Mar. Sci.* **22**, 537-558 (1972).
- 74 Bannikov, A. F. An new species of stromateoid fishes (Perciformes) the Lower Oligocene of the Caucasus. *Paleontol. J.* **22**, 107-112 (1988).
- 75 Bannikov, A. Morphology and phylogeny of fossil stromateoid fishes (Perciformes). *Geobios* **28**, Supplement 2, 177-181 (1995).
- 76 Doiuchi, R., Sato, T. & Nakabo, T. Phylogenetic relationships of the stromateoid fishes (Perciformes). *Ichthyol. Res.* **51**, 202-212 (2004).
- 77 Carnevale, G. Fossil fishes from the Serravallian (Middle Miocene) of Torricella Peligna, Italy. *Palaeontographia Italica* **91**, 1-67 (2007).
- 78 Santini, F., Carnevale, G. & Sorenson, L. First molecular scombrid timetree (Percomorpha: Scombridae) shows recent radiation of tunas following invasion of pelagic habitat. *Ital. J. Zool.* **80**, 210-221, doi:Doi 10.1080/11250003.2013.775366 (2013).
- 79 Arambourg, C. Resultats scientifiques de la mission C. Arambourg en Syrie et en Iran (1938–1939). II. Les poissons Oligocène de l'Iran. *Notes Mém. Moyen-Orient* **8**, 1-210 (1967).
- 80 Matsui, T. Review of mackerel genera *Scomber* and *Rastrelliger* with description of a new species of *Rastrelliger*. *Copeia* **1967**, 71-83 (1967).
- 81 Monsch, K. A. Revision of the scombroid fishes from the Cenozoic of England. *T Roy Soc Edin-Earth* **95**, 445-489 (2005).
- 82 Monsch, K. A. The PhyloCode, or alternative nomenclature: Why it is not beneficial to palaeontology, either. *Acta Palaeontol Pol* **51**, 521-524 (2006).
- 83 Collette, B. B. & Russo, J. L. Morphology, systematics, and biology of the Spanish Mackerels (*Scomberomorus*, Scombridae). *Fish. Bull.* **82**, 545-692 (1984).
- 84 Leriche, M. Les poissons éocènes de la Belgique. *Memoirs of the Royal Belgian Museum of Natural Sciences* **3**, 49-228 (1905).
- 85 Monsch, K. A. & Bannikov, A. F. New taxonomic synopses and revision of the scombroid fishes (Scombroidei, Perciformes), including billfishes, from the Cenozoic of territories of the former USSR. *Earth Env Sci T R So* **102**, 253-300, doi:Doi 10.1017/S1755691011010085 (2011).

- 86 Bannikov, A. F. Fossil scombrids of the USSR. *Trudy Paleon. Inst.* **210**, 1-111 (1985).
- 87 Murray, A. M. & Thewissen, J. G. M. Eocene actinopterygian fishes from Pakistan, with the description of a new genus and species of channid (Channiformes). *J. Vert. Paleo.* **28**, 41-52 (2008).
- 88 Gingerich, P. D. Stratigraphic and micropaleontological constraints on the middle Eocene age of the mammal-bearing Kuldana Formation of Pakistan. *J. Vert. Paleo.* **23**, 643-651, doi:Doi 10.1671/2409 (2003).
- 89 Rabosky, D. L. *et al.* An inverse latitudinal gradient in speciation rate for marine fishes. *Nature*, doi:10.1038/s41586-018-0273-1 (2018).
- 90 Bannikov, A. The systematic composition of the Eocene actinopterygian fish fauna from Monte Bolca, northern Italy, as known to date. *St. Ric. Giac. Terz. Bolca* **15** (2014).
- 91 Carnevale, G., Bannikov, A., Marramà, G., Tyler, J. C. & Zorzin, R. in *The Bolca Fossil-Lagerstätten: A window into the Eocene World* (eds C. Andrea Papazzoni *et al.*) 37-63 (Rendiconti della Società Paleontologica Italiana, 2014).
- 92 Johnson, G. D. Scombroid phylogeny: an alternative hypothesis. *Bull. Mar. Sci.* **39**, 1-41 (1986).
- 93 Near, T. J. *et al.* Phylogeny and tempo of diversification in the superradiation of spiny-rayed fishes. *Proc. Nat. Acad. Sci. USA* **110**, 12738-12743, doi:10.1073/pnas.1304661110 (2013).
- 94 Friedman, M. & Johnson, G. D. A new species of *Mene* (Perciformes: Menidae) from the Paleocene of South America, with notes on paleoenvironment. *J. Vert. Paleo.* **25**, 770-783 (2005).
- 95 Bonde, N. A distinct fish fauna in the basal ashseries of the Fur/Ølst Formation (U. Paleocene, Denmark). *Aarhus Geoscience* **6**, 33-48 (1997).
- 96 Anthonissen, D. E. & Ogg, J. G. in *The Geologic Time Scale 2012* (eds F. Gradstein, J. Ogg, M.D. Schmitz, & G.M. Ogg) 1083-1127 (Elsevier, 2012).
- 97 Smith-Vaniz, W. F. in *Ontogeny and systematics of fishes* (eds H.G. Moser *et al.*) 522-530 (Allen Press, 1984).
- 98 Eastman, C. R. Descriptions of Bolca fishes. *Bull. Mus. Comp. Zool.* **46**, 1-36 (1904).
- 99 Gushiken, S. Phylogenetic relationships of the perciform genera of the family Carangidae. *Jap. J. Ich.* **34**, 443-461 (1988).
- 100 Friedman, M., Johanson, Z., Harrington, R. C., Near, T. J. & Graham, M. R. An early fossil remora (Echeneoidea) reveals the evolutionary assembly of the adhesion disc. *Proc. R. Soc. B* **280**, 20131200, doi:10.1098/rspb.2013.1200 (2013).
- 101 Micklich, N. R. New information on the fish fauna of the Frauenweiler fossil site. *Ital. J. Zool.* **65**, 169-184 (1998).
- 102 O'Toole, B. Phylogeny of the species of the superfamily Echeneoidea (Perciformes : Carangoidei: Echeneidae, Rachycentridae, and Coryphaenidae), with an interpretation of echeneid hitchhiking behaviour. *Can. J. Zool.* **80**, 596-623 (2002).
- 103 Bannikov, A. F. Fossil carangids and apolectids of the USSR. *Trudy Paleon. Inst.* **244**, 1-106 (1990).
- 104 Friedman, M. The evolutionary origin of flatfish asymmetry. *Nature* **454**, 209-212 (2008).
- 105 Chanet, B. A cladistic reappraisal of the fossil flatfishes record consequences on the phylogeny of the Pleuronectiformes (Osteichthyes: Teleostei). *Ann. Sci. nat., Zool., Paris 13e Sér.* **18** (1997).

- 106 Chanet, B. *Eubuglossus eocenicus* (Woodward 1910) from the Upper Lutetian of Egypt, one of the oldest soleids (Teleostei, Pleuronectiformes). *Neu. Jahrbuch Geolo. Paläon., Monatshefte* **1994**, 391-398 (1994).
- 107 Chapleau, F. & Keast, A. A phylogenetic reassessment of the monophyletic status of the family Soleidae, with comments on the suborder Soleoidei (Pisces, Pleuronectiformes). *Can. J. Zool.* **66**, 2797-2810, doi:DOI 10.1139/z88-408 (1988).
- 108 Baciú, D. S. & Chanet, B. Les poissons plats fossils (Teleostei: Pleuronectiformes) de l'Oligocène de Piatra Neamt (Roumanie). *Oryctos* **4**, 17-38 (2002).
- 109 Sakamoto, K., Uyeno, T. & Micklich, N. *Oligopleuronectes germanicus* gen. et sp. nov., an Oligocene pleuronectid flatfish from Frauenweiler, S-Germany. *Bulletin of the National Science Museum Series C (Geology & Paleontology)* **30**, 89-94 (2004).
- 110 Cooper, J. A. & Chapleau, F. Phylogenetic status of *Paralichthodes algoensis* (Pleuronectiformes: Paralichthodidae). *Copeia* **1998**, 477-481. (1998).
- 111 Carnevale, G., Bannikov, A. F., Landini, W. & Sorbini, C. Volhynian (early Sarmatian sensu lato) fishes from Tsurevsky, North Caucasus, Russia. *J. Paleontol.* **80**, 684-699, doi:Doi 10.1666/0022-3360(2006)80[684:Vesslf]2.0.Co;2 (2006).
- 112 Chanet, B. & Sorbini, C. A male fish *Bothus podas* (Delaroche, 1809) (Pleuronectiformes: Bothidae) in the Pliocene of the Marecchia river (Italy). *Bollettino della Societa Paleontologica Italiana* **40**, 345-350 (2001).
- 113 Murray, A. M. Eocene cichlid fishes from Tanzania, East Africa. *J. Vert. Paleo.* **20**, 651-664 (2000).
- 114 Murray, A. M. The oldest fossil cichlids (Teleostei: Perciformes): Indication of a 45 million-year-old species flock. *Proc. R. Soc. B* **268**, 679-684. (2001).
- 115 Murray, A. M. The fossil record and biogeography of the Cichlidae (Actinopterygii: Labroidei). *Biol. J. Linn. Soc.* **74**, 517-532 (2001).
- 116 Harrison, T. *et al.* in *Eocene biodiversity: Unusual occurrences and rarely sampled habitats* (ed G.F. Gunnell) 39-74 (Kluwer Academic/Plenum Publishers, 2001).
- 117 Benton, M. J. *et al.* Constraints on the timescale of animal evolutionary history. *Palaeontologia Electronica* **18** (2015).
- 118 Bannikov, A., Parin, N. V. & Pinna, J. *Rhamphexocoetus volans*, gen. et sp. nov. a new beloniform fish (Beloniformes, Exocoetidei) from the lower Eocene of Italy. *J. Ichthyol.* **25(2)**, 150-155 (1985).
- 119 Rosen, D. E. The relationships and taxonomic position of the halfbeaks, killifishes, silversides and their relatives. *Bull. Amer. Mus. Nat. Hist.* **127**, 217-268 (1964).
- 120 Rosen, D. E. & Parenti, L. R. Relationships of *Oryzias* and the groups of atherinomorph fishes. *Amer. Mus. Novit.* **2719**, 1-25 (1981).
- 121 Collette, B. B., McGowen, G. E., Parin, N. V. & Mito, S. in *Ontogeny and systematics of fishes* (eds H.G. Moser *et al.*) 335-354 (American Society of Ichthyologists and Herpetologists, 1984).
- 122 Bellwood, D. R. & Schultz, O. A review of the fossil record of parrotfishes (Labroidei: Scaridae) with a description of a new *Calatomus* species from the Middle Miocene (Badenian) of Austria. *Ann. Naturhist. Mus. Wien* **92**, 55-71 (1991).
- 123 Bannikov, A. F. & Tyler, J. C. Phylogenetic revision of the fish families Luvaridae and †Kushlukiidae (Acanthuroidei), with a new genus and two new species of Eocene luvarids. *Smithson. Contrib. Paleobiol.* **81**, 1-45 (1995).

- 124 Blot, J. & Tyler, J. C. New genera and species of fossil surgeon fishes and their relatives (Acanthuroidei, Teleostei) from the Eocene of Monte Bolca, Italy, with application of the Blot Formula to both fossil and recent forms. *St. Ric. Giac. Terz. Bolca* **6**, 13-92 (1990).
- 125 Tyler, J. C. & Bannikov, A. F. Relationships of the fossil and recent genera of rabbitfishes (Acanthuroidei: Siganidae). *Smithson. Contrib. Paleobiol.* **84**, 1-35 (1997).
- 126 Micklich, N. R., Tyler, J. C., Johnson, G. D., Swidnicka, E. & Bannikov, A. F. First fossil records of the tholichthys larval stage of butterfly fishes (Perciformes, Chaetodontidae), from the Oligocene of Europe. *Palaontol. Z.* **83**, 479-497 (2009).
- 127 Carnevale, G. Morphology and biology of the Miocene butterflyfish *Chaetodon ficheuri* (Teleostei: Chaetodontidae). *Zool. J. Linn. Soc.* **146**, 251-267 (2006).
- 128 Blum, S. D. *The osteology and phylogeny of the Chaetodontidae (Teleostei: Perciformes)*, University of Hawaii, (1988).
- 129 Krijgsman, W., Hilgen, F. J., Raffi, I., Sierro, F. J. & Wilson, D. S. Chronology, causes and progression of the Messinian salinity crisis. *Nature* **400**, 652-655 (1999).
- 130 Hilgen, F. J. *et al.* Extending the astronomical (polarity) time scale into the Miocene. *Earth Planet. Sci. Lett.* **136**, 495-510 (1995).
- 131 Carnevale, G. The first fossil ribbonfish (Teleostei, Lampridiformes, Trachipteridae). *Geol. Mag.* **141**, 573-582 (2004).
- 132 Yabumoto, Y. & Uyeno, T. A new Miocene ponyfish of the genus *Leiognathus* (Pisces, Leiognathidae). *Bull. Nat. Sci. Mus., Tokyo Ser. C* **20**, 67-77 (1994).
- 133 Yabumoto, Y. & Uyeno, T. *Euleiognathus*, a new genus proposed for the Miocene ponyfish, *Leiognathus tottori* Yabumoto and Uyeno 1994 (Perciformes: Leiognathidae) from Japan. *Ichthyol. Res.* **58**, 19-23 (2011).
- 134 Chakrabarty, P. & Sparks, J. S. Diagnoses for *Leiognathus* Lacepede 1802, *Equula* Cuvier 1815, *Equulites* Fowler 1904, *Eubleekeria* Fowler 1904, and a new ponyfish genus (Teleostei: Leiognathidae). *Amer. Mus. Novit.*, 1-11 (2008).
- 135 Yamashita, T. & Kimura, S. A new species, *Gazza squamiventralis*, from the East Coast of Africa (Perciformes: Leiognathidae). *Ichthyol. Res.* **48**, 161-166 (2001).
- 136 Sparks, J. S. & Chakrabarty, P. Description of a new genus of ponyfishes (Teleostei: Leiognathidae), with a review of the current generic-level composition of the family. *Zootaxa* **3947**, 181-190 (2015).
- 137 Sparks, J. S., Dunlap, P. V. & Smith, W. L. Evolution and diversification of a sexually dimorphic luminescent system in ponyfishes (Teleostei: Leiognathidae), including diagnoses for two new genera. *Cladistics* **21**, 305-327 (2005).
- 138 Gill, A. C. & Michalski, S. Osteological evidence for monophyly of the Leiognathidae (Teleostei: Acanthomorpha: Acanthuriformes). *Zootaxa; Vol 4732, No 3: 13 Feb. 2020* DOI - 10.11646/zootaxa.4732.3.4 (2020).
- 139 Lourens, L., Hilgen, F., Shackleton, N. J., Laskar, J. & Wilson, D. in *A geologic time scale 2004* (eds F. Gradstein, J. Ogg, & A. Smith) 409-440 (Cambridge University Press, 2004).
- 140 Santini, F. & Tyler, J. C. A phylogeny of the families of fossil and extant tetraodontiform fishes (Acanthomorpha, Tetraodontiformes), Upper Cretaceous to recent. *Zool. J. Linn. Soc.* **139**, 565-617 (2003).
- 141 Bannikov, A. F. & Tyler, J. C. A new genus and species of triggerfish from the Middle Eocene of the northern Caucasus, the earliest member of the Balistidae (Tetraodontiformes). *Paleontol. J.* **42**, 615-620 (2008).

- 142 Carnevale, G. & Pietsch, T. W. An Eocene frogfish from Monte Bolca, Italy: The earliest  
known skeletal record for the family. *Palaeontology* **52**, 745-752 (2009).
- 143 Pietsch, T. W. The osteology and relationships of the anglerfish genus *Tetrabrachium*  
with comments on lophiiform classification. *Fish. Bull.* **79**, 387-419 (1981).
- 144 Pietsch, T. W. in *Ontogeny and systematics of fishes* (eds H.G. Moser *et al.*) 320-325  
(American Society of Ichthyologists and Herpetologists, 1984).
- 145 Alda, F., Ludt, W. B., Elías, D. J., McMahan, C. D. & Chakrabarty, P. Comparing  
ultraconserved elements and exons for phylogenomic analyses of Middle American  
cichlids: when data agree to disagree. *Genome Biol Evol* **13**, doi:10.1093/gbe/evab161  
(2021).
- 146 Meiklejohn, K. A., Faircloth, B. C., Glenn, T. C., Kimball, R. T. & Braun, E. L. Analysis  
of a rapid evolutionary radiation using ultraconserved elements: evidence for a bias in  
some multispecies coalescent methods. *Syst. Biol.* **65**, 612-627,  
doi:10.1093/sysbio/syw014 (2016).
- 147 McCormack, J. E. *et al.* A phylogeny of birds based on over 1,500 loci collected by target  
enrichment and high-throughput sequencing. *Plos One* **8**, doi:ARTN e54848  
DOI 10.1371/journal.pone.0054848 (2013).
- 148 Lambert, S. M., Reeder, T. W. & Wiens, J. J. When do species-tree and concatenated  
estimates disagree? An empirical analysis with higher-level scincid lizard phylogeny.  
*Mol. Phylogenet. Evol.* **82**, 146-155, doi:https://doi.org/10.1016/j.ympev.2014.10.004  
(2015).
- 149 Betancur-R, R. *et al.* Phylogenetic classification of bony fishes. *BMC Evol. Biol.* **17**, 162,  
doi:10.1186/s12862-017-0958-3 (2017).
- 150 Greenwood, P. H., Rosen, D. E., Weitzman, S. H. & Myers, G. S. Phyletic studies of  
teleostean fishes, with a provisional classification of living forms. *Bull. Amer. Mus. Nat.  
Hist.* **131**, 341-455 (1966).
- 151 Nelson, J. S., Grande, T. C. & Wilson, M. V. H. *Fishes of the world*. 5th edn, (John  
Wiley & Sons, Inc., 2016).
- 152 Betancur-R, R. *et al.* The tree of life and a new classification of bony fishes. *PLOS Cur.  
Tree of Life* **2013**, doi:10.1371/currents.tol.53ba26640df0ccaee75bb165c8c26288 (2013).
- 153 Li, B. *et al.* RNF213, a new nuclear marker for acanthomorph phylogeny. *Mol.  
Phylogenet. Evol.* **50**, 345-363 (2009).
- 154 Wainwright, P. C. *et al.* The evolution of pharyngognathy: a phylogenetic and functional  
appraisal of the pharyngeal jaw key innovation in labroid fishes and beyond. *Syst. Biol.*  
**61**, 1001-1027, doi:10.1093/sysbio/sys060 (2012).
- 155 Malmstrøm, M. *et al.* Evolution of the immune system influences speciation rates in  
teleost fishes. *Nat Genet* **48**, 1204-1210, doi:10.1038/ng.3645  
<http://www.nature.com/ng/journal/v48/n10/abs/ng.3645.html#supplementary-information>  
(2016).
- 156 Johnson, G. D. & Patterson, C. Percomorph phylogeny: a survey of acanthomorphs and a  
new proposal. *Bull. Mar. Sci.* **52**, 554-626 (1993).
- 157 Roa-Varón, A. *et al.* Confronting sources of systematic error to resolve historically  
contentious relationships: a case study using gadiform fishes (Teleostei,  
Paracanthopterygii, Gadiformes). *Syst. Biol.*, doi:10.1093/sysbio/syaa095 (In press).



- 158 Dornburg, A. *et al.* New insights on the sister lineage of percomorph fishes with an anchored hybrid enrichment dataset. *Mol. Phylogenet. Evol.* **110**, 27-38, doi:<https://doi.org/10.1016/j.ympev.2017.02.017> (2017).
- 159 Fricke, R., Eschmeyer, W. N. & Fong, J. D. *Eschmeyer's Catalog of Fishes: species by family/subfamily*, <<http://researcharchive.calacademy.org/research/ichthyology/catalog/SpeciesByFamily.a.sp>> (2021).
- 160 Gill, F., Donsker, D. & Rasmussen, P. *IOC World Bird List (v10.2)*, (2020).
- 161 Burgin, C. J., Colella, J. P., Kahn, P. L. & Upham, N. S. How many species of mammals are there? *J. Mammal.* **99**, 1-14, doi:10.1093/jmammal/gyx147 (2018).
- 162 Uetz, P., Freed, P. & Hošek, J. *The Reptile Database*, <http://www.reptile-database.org> accessed December 2020, (2020).
- 163 Jordan, D. S. A classification of fishes including families and genera as far as known. *Stanford University Publications University Series Biological Sciences* **3**, 77-243 (1923).
- 164 Nelson, J. S. *Fishes of the world, 4th edition*. (John Wiley, 2006).
- 165 Smith, W. L. & Craig, M. T. Casting the percomorph net widely: the importance of broad taxonomic sampling in the search for the placement of serranid and percid fishes. *Copeia* **2007**, 35-55 (2007).
- 166 Nelson, G. in *The hierarchy of life: molecules and morphology in phylogenetic analysis* (eds B. Fernholm, K. Bremer, & H. Jörnvall) 325-336 (Elsevier, 1989).
- 167 Møller, P. R., Knudsen, S. W., Schwarzhans, W. & Nielsen, J. G. A new classification of viviparous brotulas (Bythitidae) – with family status for Dinematchthyidae – based on molecular, morphological and fossil data. *Mol. Phylogenet. Evol.* **100**, 391-408, doi:<http://dx.doi.org/10.1016/j.ympev.2016.04.008> (2016).
- 168 Campbell, M. A. *et al.* Evolutionary affinities of the unfathomable Parabrotulidae: molecular data indicate placement of *Parabrotula* within the family Bythitidae, Ophidiiformes. *Mol. Phylogenet. Evol.* **109**, 337-342, doi:<https://doi.org/10.1016/j.ympev.2017.02.004> (2017).
- 169 Evseenko, S. A., Gordeeva, N. V., Bolshakova, Y. Y. & Kobylansky, S. H. Morphology and molecular phylogenetic relationships of *Barathronus multidentis* (Ophidiiformes: Bythitidae). *Cybium: international journal of ichthyology* **42**, 137-141 (2018).
- 170 Miya, M., Satoh, T. R. & Nishida, M. The phylogenetic position of toadfishes (order Batrachoidiformes) in the higher ray-finned fish as inferred from partitioned Bayesian analysis of 102 whole mitochondrial genome sequences. *Biol. J. Linn. Soc.* **85**, 289-306 (2005).
- 171 Smith, W. L. & Wheeler, W. C. Venom evolution widespread in fishes: a phylogenetic road map for the bioprospecting of piscine venoms. *J. Hered.* **97**, 206-217 (2006).
- 172 Thacker, C. E. Phylogeny of Gobioidae and placement within Acanthomorpha, with a new classification and investigation of diversification and character evolution. *Copeia* **2009**, 93-104 (2009).
- 173 Chakrabarty, P., Davis, M. P. & Sparks, J. S. The first record of a trans-oceanic sister-group relationship between obligate vertebrate troglobites. *Plos One* **7** (2012).
- 174 Kuang, T. *et al.* Phylogenomic analysis on the exceptionally diverse fish clade Gobioidae (Actinopterygii: Gobiiformes) and data-filtering based on molecular clocklikeness. *Mol. Phylogenet. Evol.* **128**, 192-202, doi:<https://doi.org/10.1016/j.ympev.2018.07.018> (2018).

- 175 McCraney, W. T., Thacker, C. E. & Alfaro, M. E. Supermatrix phylogeny resolves goby lineages and reveals unstable root of Gobiaria. *Mol. Phylogenet. Evol.* **151**, 106862, doi:https://doi.org/10.1016/j.ympev.2020.106862 (2020).
- 176 Thacker, C. E. *et al.* Molecular phylogeny of Percomorpha resolves *Trichonotus* as the sister lineage to Gobioidae (Teleostei: Gobiiformes) and confirms the polyphyly of Trachinoidei. *Mol. Phylogenet. Evol.* **93**, 172-179, doi:https://doi.org/10.1016/j.ympev.2015.08.001 (2015).
- 177 Orrell, T. M., Collette, B. B. & Johnson, G. D. Molecular data support separate scombroid and xiphioid clades. *Bull. Mar. Sci.* **79**, 505-519 (2006).
- 178 Song, H. Y. *et al.* Mitogenomic circumscription of a novel percomorph fish clade mainly comprising "Syngnathoidae" (Teleostei). *Gene* **542**, 146-155, doi:10.1016/j.gene.2014.03.040 (2014).
- 179 Gosline, W. A. A reinterpretation of the teleostean fish order Gobiesociformes. *Proc. California Acad. Sci.* **38**, 363-381 (1970).
- 180 Nelson, J. S. *Fishes of the world, 3rd edition*. 3rd edn, (Wiley, 1994).
- 181 Springer, V. G. & Johnson, G. D. Study of the dorsal gill-arch musculature of teleostome fishes, with special reference to the Actinopterygii. *Bull. Biol. Soc. Wash.* **11**, 1-260 (2004).
- 182 Wiley, E. O. & Johnson, G. D. in *Origin and phylogenetic interrelationships of teleosts* (eds J.S. Nelson, H.-P. Schultz, & M.V.H. Wilson) 123-182 (Verlag Dr. Friedrich Pfeil, 2010).
- 183 Johnson, G. D. Percomorph phylogeny: progress and problems. *Bull. Mar. Sci.* **52**, 3-28 (1993).
- 184 Kim, B.-J. Comparative anatomy and phylogeny of the family Mullidae (Teleostei: Perciformes). *Memoirs of the Graduate School of Fisheries Sciences, Hokkaido University* **49**, 1-74 (2002).
- 185 Parenti, L. R. Relationships of atherinomorph fishes (Teleostei). *Bull. Mar. Sci.* **52**, 170-196. (1993).
- 186 Reznick, D. N., Furness, A. I., Meredith, R. W. & Springer, M. S. The origin and biogeographic diversification of fishes in the family Poeciliidae. *PLOS ONE* **12**, e0172546, doi:10.1371/journal.pone.0172546 (2017).
- 187 Bragança, P. H. N., Amorim, P. F. & Costa, W. J. E. M. Pantanodontidae (Teleostei, Cyprinodontiformes), the sister group to all other cyprinodontoid killifishes as inferred by molecular data. *Zoosystematics and Evolution* **94**, 137-145 (2018).
- 188 Pohl, M., Milvertz, F., Meyer, A. & Vences, M. Multigene phylogeny of cyprinodontiform fishes suggests continental radiations and a rogue taxon position of Pantanodon. *Vertebrate Zoology* **65**, 37-44 (2015).
- 189 Parenti, L. R. A phylogenetic and biogeographic analysis of cyprinodontiform fishes (Teleostei: Atherinomorpha). *Bull. Amer. Mus. Nat. Hist.* **168**, 335-557 (1981).
- 190 Costa, W. J. E. M. in *Phylogeny and classification of Neotropical fishes* (eds L.R. Malabarba *et al.*) 537-560 (EDIPUCRS, 1998).
- 191 Lovejoy, N. R. Reinterpreting recapitulation: Systematics of needlefishes and their allies (Teleostei : Beloniformes). *Evolution* **54**, 1349-1362 (2000).
- 192 Lovejoy, N. R., Iranpour, M. & Collette, B. B. Phylogeny and jaw ontogeny of beloniform fishes. *Integ. Comp. Biol.* **44**, 366-377, doi:Doi 10.1093/Icb/44.5.366 (2004).

- 193 Dasilao, J. C. & Sasaki, K. Phylogeny of the flyingfish family Exocoetidae (Teleostei, Beloniformes). *Ichthyol. Res.* **45**, 347-353, doi:10.1007/BF02725187 (1998).
- 194 Bloom, D. D., Unmack, P. J., Gosztonyi, A. E., Piller, K. R. & Lovejoy, N. R. It's a family matter: molecular phylogenetics of Atheriniformes and the polyphyly of the surf silversides (Family: Notocheiridae). *Mol. Phylogenet. Evol.* **62**, 1025-1030 (2012).
- 195 Campanella, D. *et al.* Multi-locus fossil-calibrated phylogeny of Atheriniformes (Teleostei, Ovalentaria). *Mol. Phylogenet. Evol.* **86**, 8-23, doi:https://doi.org/10.1016/j.ympev.2015.03.001 (2015).
- 196 Dyer, B. S. & Chernoff, B. Phylogenetic relationships among atheriniform fishes (Teleostei: Atherinomorpha). *Zool. J. Linn. Soc.* **117**, 1-69 (1996).
- 197 Liem, K. F. & Greenwood, P. H. A functional-approach to the phylogeny of the pharyngognath teleosts. *Am. Zool.* **21**, 83-101 (1981).
- 198 Kaufman, L. & Liem, K. F. Fishes of the suborder Labroidei (Pisces: Perciformes): phylogeny, ecology, and evolutionary significance. *Breviora* **472**, 1-19 (1982).
- 199 Springer, V. G. & Orrell, T. M. Appendix: phylogenetic analysis of 147 families of acanthomorph fishes based primarily on dorsal gill-arch muscles and skeleton. - In: Springer, V.G. & Johnson, G.D. Study of the dorsal gill-arch musculature of teleostome fishes, with special reference to the Actinopterygii. *Bull. Biol. Soc. Wash.* **11**, 236-260 (2004).
- 200 Rosen, D. E. & Patterson, C. On Müller's and Cuvier's concepts of pharyngognath and labyrinth fishes and the classification of percomorph fishes, with an atlas of percomorph dorsal gill arches. *Amer. Mus. Novit.* **2983**, 1-57 (1990).
- 201 Collins, R. A., Britz, R. & Rüber, L. Phylogenetic systematics of leaffishes (Teleostei: Polycentridae, Nandidae). *J. Zool. Syst. Evol. Res.* **53**, 259-272, doi:10.1111/jzs.12103 (2015).
- 202 Lundberg, J. G. in *Biological Relationships between Africa and South America* (ed P. Goldblatt) 156-199 (Yale University Press, 1993).
- 203 Lavoué, S. Origins of Afrotropical freshwater fishes. *Zool. J. Linn. Soc.* **188**, 345-411, doi:10.1093/zoolinnean/zlz039 (2020).
- 204 Stiassny, M. L. J. What are grey mullets? *Bull. Mar. Sci.* **52**, 197-219. (1993).
- 205 Stiassny, M. L. J. Notes on the anatomy and relationships of the bedotiid fishes of Madagascar, with a taxonomic revision of the genus *Rheocles* (Atherinomorpha: Bedotiidae). *Amer. Mus. Novit.* **2979**, 1-33 (1990).
- 206 Lin, H. C. & Hastings, P. A. Phylogeny and biogeography of a shallow water fish clade (Teleostei: Blenniiformes). *BMC Evol. Biol.* **13**, doi:Unsp 210 Doi 10.1186/1471-2148-13-210 (2013).
- 207 Kawahara, R. *et al.* Interrelationships of the 11 gasterosteiform families (sticklebacks, pipefishes, and their relatives): a new perspective based on whole mitogenome sequences from 75 higher teleosts. *Mol. Phylogenet. Evol.* **46**, 224-236 (2008).
- 208 Mabuchi, K., Miya, M., Azuma, Y. & Nishida, M. Independent evolution of the specialized pharyngeal jaw apparatus in cichlid and labrid fishes. *BMC Evol. Biol.* **7**, - (2007).
- 209 Britz, R. & Johnson, G. D. "Paradox Lost": Skeletal ontogeny of *Indostomus paradoxus* and its significance for the phylogenetic relationships of Indostomidae (Teleostei, Gasterosteiformes). *Amer. Mus. Novit.* **3383**, 1-43 (2002).

- 210 Travers, R. A. A review of the Mastacembeloidei, a suborder of synbranchiform teleost fishes. Part II: Phylogenetic analysis. *Bull. Br. Mus. Nat. Hist. (Zool.)* **47**, 83-150 (1984).
- 211 Gosline, W. A. The suborders of perciform fishes. *Proceedings of the United States National Museum* **124**, 1-78 (1968).
- 212 Datovo, A., de Pinna, M. C. C. & Johnson, G. D. The infrabranchial musculature and Its bearing on the phylogeny of percomorph fishes (Osteichthyes: Teleostei). *Plos One* **9**, e110129, doi:10.1371/journal.pone.0112600 (2014).
- 213 Li, C. H., Ricardo, B. R., Smith, W. L. & Ortí, G. Monophyly and interrelationships of snook and barramundi (Centropomidae *sensu* Greenwood) and five new markers for fish phylogenetics. *Mol. Phylogenet. Evol.* **60**, 463-471 (2011).
- 214 Sanciangco, M. D., Carpenter, K. E. & Betancur-R, R. Phylogenetic placement of enigmatic percomorph families (Teleostei: Percomorphaceae). *Mol. Phylogenet. Evol.* **94**, Part B, 565-576, doi:http://dx.doi.org/10.1016/j.ympev.2015.10.006 (2016).
- 215 Girard, M. G., Davis, M. P. & Smith, W. L. The phylogeny of carangiform fishes: morphological and genomic investigations of a new fish clade. *Copeia* **108**, 265-298, doi:10.1643/CI-19-320 (2020).
- 216 Smith, W. L., Stern, J. H., Girard, M. G. & Davis, M. P. Evolution of venomous cartilaginous and ray-finned fishes. *Integ. Comp. Biol.* **56**, 950-961, doi:10.1093/icb/icw070 (2016).
- 217 Chen, W.-J., Bonillo, C. & Lecointre, G. Repeatability of clades as a criterion of reliability: a case study for molecular phylogeny of Acanthomorpha (Teleostei) with larger number of taxa. *Mol. Phylogenet. Evol.* **26**, 262-288 (2003).
- 218 Dettai, A. & Lecointre, G. In search of notothenioid (Teleostei) relatives. *Antarctic Sci.* **16**, 71-85 (2004).
- 219 Miya, M. *et al.* Major patterns of higher teleostean phylogenies: a new perspective based on 100 complete mitochondrial DNA sequences. *Mol. Phylogenet. Evol.* **26**, 121-138, doi:10.1016/S1055-7903(02)00332-9 (2003).
- 220 Matschiner, M., Hanel, R. & Salzburger, W. On the origin and trigger of the notothenioid adaptive radiation. *Plos One* **6**, e18911 (2011).
- 221 Lautredou, A.-C. *et al.* New nuclear markers and exploration of the relationships among Serraniformes (Acanthomorpha, Teleostei): the importance of working at multiple scales. *Mol. Phylogenet. Evol.* **67**, 140-155 (2013).
- 222 Johnson, G. D. *Niphon spinosus*: A primitive epinepheline serranid, with comments on the monophyly and intrarelationships of the Serranidae. *Copeia*, 777-787 (1983).
- 223 Johnson, G. D. *Niphon spinosus*, a primitive epinepheline serranid: corroborative evidence from the larvae. *Jap. J. Ich.* **35**, 7-18 (1988).
- 224 Johnson, G. D. in *Ontogeny and systematics of fishes* (eds H.G. Moser *et al.*) 464-498 (American Society of Ichthyologists and Herpetologists, 1984).
- 225 Near, T. J. *et al.* Identification of the notothenioid sister lineage illuminates the biogeographic history of an Antarctic adaptive radiation. *BMC Evol. Biol.* **15**, 109, doi:10.1186/s12862-015-0362-9 (2015).
- 226 Smith, W. L., Elizabeth, E. & Clara, R. Phylogeny and taxonomy of flatheads, scorpionfishes, sea robins, and stonefishes (Percomorpha: Scorpaeniformes) and the evolution of the lachrymal saber. *Copeia* **106**, 94-119, doi:10.1643/CG-17-669 (2018).

- 227 Clardy, T. R. *Phylogenetic systematics of the prickleback family Stichaeidae (Cottiformes: Zoarcidae) using morphological data* Ph.D. thesis, The College of William & Mary, (2014).
- 228 Kwun, H. J. & Kim, J.-K. Molecular phylogeny and new classification of the genera *Eulophias* and *Zoarchias* (PISCES, Zoarcoidei). *Mol. Phylogenet. Evol.* **69**, 787-795, doi:https://doi.org/10.1016/j.ympev.2013.06.025 (2013).
- 229 Radchenko, O. A. The system of the suborder Zoarcoidei (Pisces, Perciformes) as inferred from molecular genetic data. *Russian Journal of Genetics* **51**, 1096-1112, doi:10.1134/S1022795415100130 (2015).
- 230 Near, T. J. *et al.* Nuclear gene-inferred phylogenies resolve the relationships of the enigmatic Pygmy Sunfishes, *Elassoma* (Teleostei: Percomorpha). *Mol. Phylogenet. Evol.* **63**, 388-395, doi:10.1016/j.ympev.2012.01.011 (2012).
- 231 Chen, W.-J., Lavoué, S., Beheregaray, L. B. & Mayden, R. L. Historical biogeography of a new antitropical clade of temperate freshwater fishes. *J. Biogeogr.* **41**, 1806-1818, doi:10.1111/jbi.12333 (2014).
- 232 Greenwood, P. H. A revised familial classification for certain cirrhitoid genera (Teleostei, Percoidae Cirrhitidae), with comments on the group's monophyly and taxonomic ranking. *Bull. Nat. Hist. Mus. Lond. (Zool.)* **61**, 1-10 (1995).
- 233 Burrige, C. P. & Smolenski, A. J. Molecular phylogeny of the Cheilodactylidae and Latridae (Perciformes: Cirrhitidae) with notes on taxonomy and biogeography. *Mol. Phylogenet. Evol.* **30**, 118-127 (2004).
- 234 Kimura, K., Imamura, H. & Kawai, T. Comparative morphology and phylogenetic systematics of the families Cheilodactylidae and Latridae (Perciformes: Cirrhitidae), and proposal of a new classification. *Zootaxa* **4536**, doi:10.11646/zootaxa.4536.1.1 (2018).
- 235 Ludt, W. B., Burrige, C. P. & Chakrabarty, P. A taxonomic revision of Cheilodactylidae and Latridae (Centrarchiformes: Cirrhitidae) using morphological and genomic characters. *Zootaxa* **4585**, doi:10.11646/zootaxa.4585.1.7 (2019).
- 236 McDowall, R. M. Relationships and taxonomy of the New Zealand torrent fish, *Cheimarrichthys fosteri* Haast (Pisces: Mugiloididae). *Journal of the Royal Soc NZ* **3**, 199-217 (1973).
- 237 Pietsch, T. W. Phylogenetic relationships of trachinoid fishes of the family Uranoscopidae. *Copeia* **1989**, 253-303 (1989).
- 238 Pietsch, T. W. & Zabatien, C. P. Osteology and interrelationships of the sand lances (Teleostei: Ammodytidae). *Copeia* **1990**, 78-100 (1990).
- 239 Imamura, H. & Matsuura, K. Redefinition and phylogenetic relationships of the family Pinguipedidae (Teleostei : Perciformes). *Ichthyol. Res.* **50**, 259-269 (2003).
- 240 McDowall, R. M. Biogeography of the New Zealand torrentfish, *Cheimarrichthys fosteri* (Teleostei : Pinguipedidae): a distribution driven mostly by ecology and behaviour. *Envir. Biol. Fishes* **58**, 119-131 (2000).
- 241 Last, P. R. in *FAO species identification guide for fishery purposes: The living marine resources of the Western Central Pacific, Volume 6. Bony fishes part 4 (Labridae to Latimeriidae)* (eds K.E. Carpenter & V.H. Niem) 3517 (FAO, 2001).
- 242 Davis, M. P., Sparks, J. S. & Smith, W. L. Repeated and widespread evolution of bioluminescence in marine fishes. *PLoS ONE* **11**, e0155154, doi:10.1371/journal.pone.0155154 (2016).

- 243 Prokofiev, A. M. Osteology and some other morphological characters of *Howella sherborni*, with a discussion of the systematic position of the genus (Perciformes, Percoidei). *J. Ichthyol.* **47**, 413-426 (2007).
- 244 Patterson, C. & Rosen, D. E. in *Papers on the systematics of gadiform fishes* Vol. 32 *Natural History Museum of Los Angeles County Science Series* (ed D.M. Cohen) 5-36 (Natural History Museum of Los Angeles County, 1989).
- 245 Chanet, B. *et al.* Evidence for a close phylogenetic relationship between the teleost orders Tetraodontiformes and Lophiiformes based on an analysis of soft anatomy. *Cybium* **37**, 179-198 (2013).
- 246 Baldwin, C. C. The phylogenetic significance of colour patterns in marine teleost larvae. *Zool. J. Linn. Soc.* **168**, 496-563 (2013).
- 247 Winterbottom, R. The familial phylogeny of the Tetraodontiformes (Acanthopterygii: Pisces) as evidenced by their myology. *Smithson. Contrib. Zool.* **No. 155**, 1-201 (1974).
- 248 Leis, J. M. in *Ontogeny and systematics of fishes* (eds H.G. Moser *et al.*) 459-463 (American Society of Ichthyologists and Herpetologists, 1984).
- 249 Holcroft, N. I. A molecular analysis of the interrelationships of tetraodontiform fishes (Acanthomorpha : Tetraodontiformes). *Mol. Phylogenet. Evol.* **34**, 525-544 (2005).
- 250 Alfaro, M. E., Santini, F. & Brock, C. D. Do reefs drive diversification in marine teleosts? Evidence from the pufferfish and their allies (Order Tetraodontiformes). *Evolution* **61**, 2104-2126 (2007).
- 251 Yamanoue, Y. *et al.* Phylogenetic position of tetraodontiform fishes within the higher teleosts: Bayesian inferences based on 44 whole mitochondrial genome sequences. *Mol. Phylogenet. Evol.* **45**, 89-101 (2007).
- 252 Santini, F., Sorenson, L. & Alfaro, M. E. A new phylogeny of tetraodontiform fishes (Tetraodontiformes, Acanthomorpha) based on 22 loci. *Mol. Phylogenet. Evol.* **69**, 177-187, doi:Doi 10.1016/J.Ympev.2013.05.014 (2013).
- 253 Arcila, D., Pyron, R. A., Tyler, J. C., Orti, G. & Betancur-R, R. An evaluation of fossil tip-dating versus node-age calibrations in tetraodontiform fishes (Teleostei: Percomorphaceae). *Mol. Phylogenet. Evol.* **82**, 131-145 (2015).
- 254 Arcila, D. & Tyler, J. C. Mass extinction in tetraodontiform fishes linked to the Palaeocene-Eocene thermal maximum. *Proc. R. Soc. B* **284** (2017).
- 255 Miya, M. *et al.* Evolutionary history of anglerfishes (Teleostei: Lophiiformes): a mitogenomic perspective. *BMC Evol. Biol.* **10** (2010).
- 256 Pietsch, T. W. & Orr, J. W. Phylogenetic relationships of deep-sea anglerfishes of the suborder Ceratioidei (Teleostei: Lophiiformes) based on morphology. *Copeia* **2007**, 1-34 (2007).
- 257 Derouen, V., Ludt, W. B., Ho, H.-C. & Chakrabarty, P. Examining evolutionary relationships and shifts in depth preferences in batfishes (Lophiiformes: Ogcocephalidae). *Mol. Phylogenet. Evol.* **84**, 27-33, doi:https://doi.org/10.1016/j.ympev.2014.12.011 (2015).
- 258 Swann, J. B., Holland, S. J., Petersen, M., Pietsch, T. W. & Boehm, T. The immunogenetics of sexual parasitism. *Science* **369**, 1608, doi:10.1126/science.aaz9445 (2020).
- 259 Pietsch, T. W. *Oceanic anglerfishes extraordinary diversity in the deep sea.* (University of California Press, 2009).

- 260 Lanfear, R. Calculating and interpreting gene- and site-concordance factors in  
phylogenomics. [http://www.robertlanfear.com/blog/files/concordance\\_factors.html](http://www.robertlanfear.com/blog/files/concordance_factors.html)  
(2018).
- 261 Minh, B. Q., Hahn, M. W. & Lanfear, R. New methods to calculate concordance factors  
for phylogenomic datasets. *Mol. Biol. Evol.* **37**, 2727-2733, doi:10.1093/molbev/msaa106  
(2020).
- 262 de la Estrella, M., Forest, F., Wieringa, J. J., Fougère-Danezan, M. & Bruneau, A.  
Insights on the evolutionary origin of Detarioideae, a clade of ecologically dominant  
tropical African trees. *New Phytologist* **214**, 1722-1735,  
doi:<https://doi.org/10.1111/nph.14523> (2017).
- 263 Jetz, W. & Pyron, R. A. The interplay of past diversification and evolutionary isolation  
with present imperilment across the amphibian tree of life. *Nature Ecology & Evolution*  
**2**, 850-858, doi:10.1038/s41559-018-0515-5 (2018).
- 264 Thomson, R. C., Spinks, P. Q. & Shaffer, H. B. A global phylogeny of turtles reveals a  
burst of climate-associated diversification on continental margins. *Proceedings of the  
National Academy of Sciences* **118**, e2012215118, doi:10.1073/pnas.2012215118 (2021).
- 265 Condamine, F. L., Nel, A., Grandcolas, P. & Legendre, F. Fossil and phylogenetic  
analyses reveal recurrent periods of diversification and extinction in dictyopteran insects.  
*Cladistics* **36**, 394-412, doi:<https://doi.org/10.1111/cla.12412> (2020).
- 266 May, M. R., Höhna, S. & Moore, B. R. A Bayesian approach for detecting the impact of  
mass-extinction events on molecular phylogenies when rates of lineage diversification  
may vary. *Methods Ecol Evol* **7**, 947-959, doi:<https://doi.org/10.1111/2041-210X.12563>  
(2016).
- 267 Moore, B. R., Höhna, S., May, M. R., Rannala, B. & Huelsenbeck, J. P. Critically  
evaluating the theory and performance of Bayesian analysis of macroevolutionary  
mixtures. *Proceedings of the National Academy of Sciences* **113**, 9569-9574 (2016).
- 268 Rabosky, D. L., Mitchell, J. S. & Chang, J. Is BAMM Flawed? Theoretical and Practical  
Concerns in the Analysis of Multi-Rate Diversification Models. *Syst. Biol.* **66**, 477-498  
(2017).
- 269 Venditti, C., Meade, A. & Pagel, M. Multiple routes to mammalian diversity. *Nature* **479**,  
393-396, doi:Doi 10.1038/Nature10516 (2011).
- 270 Chang, J., Rabosky, D. L. & Alfaro, M. E. Estimating Diversification Rates on  
Incompletely Sampled Phylogenies: Theoretical Concerns and Practical Solutions. *Syst.  
Biol.* **69**, 602-611, doi:10.1093/sysbio/syz081 (2020).
- 271 Louca, S. & Pennell, M. W. Extant timetrees are consistent with a myriad of  
diversification histories. *Nature* **580**, 502-505, doi:10.1038/s41586-020-2176-1 (2020).
